# Supplementary material for: Heat Shock Factor 1 forms nuclear condensates and restructures the yeast genome before activating target genes
Source: eLife. 2024 Oct 15;12:RP92464. doi: 10.7554/eLife.92464 (PMC11479590; doi:10.7554/eLife.92464)
Supplement: Figure 1—source data 1. [file elife-92464-fig1-data1.xlsx]

## Sheet: Fig. 1A
Figure 1A Source Data
OD600
	NS		HS		ES
Hrs	replicate 1	replicate 2	replicate 1	replicate 2	replicate 1	replicate 2
0	0.393	0.405	0.298	0.322	0.2985	0.322
0.166			0.38	0.377	0.279	0.255
0.333			0.391	0.401	0.337	0.347
0.866			0.466	0.494	0.346	0.37
1.1	0.597	0.644
1.533			0.557	0.589	0.368	0.388
1.66	0.75	0.803
1.866			0.624	0.646	0.379	0.401
2.6			0.78	0.828	0.395	0.424
3.05			0.895	0.93	0.408	0.43

## Sheet: Fig. 1B
Figure 1B Source Data
Colony Forming Units
Time	Stress	Sample	Colony count	% of NS
0 min	NS	replicate 1	3188	100
		replicate 2	3435	100
10 min	ES	replicate 1	3113	97.6474
		replicate 2	2791	81.2518
	HS	replicate 1	2979	93.4442
		replicate 2	2587	75.313
20 min	ES	replicate 1	2768	86.8256
		replicate 2	2807	81.7176
	HS	replicate 1	2769	86.857
		replicate 2	2737	79.6798
60 min	ES	replicate 1	2416	75.7842
		replicate 2	2669	77.7001
	HS	replicate 1	2503	78.5132
		replicate 2	2590	75.4003
120 min	ES	replicate 1	2279	71.4868
		replicate 2	2549	74.2067
	HS	replicate 1	3330	104.454
		replicate 2	3549	103.319
180 min	ES	replicate 1	2366	74.2158
		replicate 2	2403	69.9563
	HS	replicate 1	3715	116.531
		replicate 2	3576	104.105

## Sheet: Fig. 1E HS-Hsp104 foci
Heat Shock (39°C) Hsp104 foci per cell
0 min				2.5 min		10 min		15 min		30 min		60 min		90 min
replicate 1	replicate 2	replicate 3	replicate 4	replicate 1	replicate 2	replicate 1	replicate 2	replicate 1	replicate 2	replicate 1	replicate 2	replicate 1	replicate 2	replicate 1	replicate 2
13	14	14	5	29	10	17	22	25	16	23	24	15	26	22	20
7	11	5	5	19	4	17	20	25	7	28	18	23	12	18	17
9	15	19	6	12	18	9	24	18	21	16	18	24	12	15	22
13	16	9	3	11	12	12	26	22	8	20	23	38	16	28	34
10	14	5	1	17	8	11	19	25	11	13	14	46	7	35	12
12	21	12	3	16	10	8	12	12	16	13	22	8	11	22	7
10	12	3	6	16	9	15	19	12	18	20	10	10	18	15	25
5	15	10	2	13	11	18	24	13	17	24	17	11	18	21	14
4	21	5	2	10	14	18	17	14	21	11	13	12	3	23	20
15	8	9	6	15	10	11	9	17	10	18	9	13	16	10	16
9	5	3	10	7	14	14	15	17	16	16	13	25	15	13	24
7	18	5	3	14	10	10	25	10	9	10	5	8	8	27	30
9	18	3	5	14	8	8	12	10	16	10	24	8	13	10	29
19	10	10	5	7	11	8	20	18	12	12	12	11	24	14	9
4	15	13	5	12	15	8	20	15	14	10	11	3	22	16	13
8	8	2	2	11	6	9	18	18	8	9	13	8	11	16	10
10	10	2	6	21	11	13	21	13	18	18	15	16	4	19	16
0	6	9	12	4	10	7	21	20	16	18	14	8	9	20	12
10	16	6	2	8	11	14	11	20	15	4	19	7	8	13	19
13	17	4	8	6	12	13	21	20	21	12	13	32	6	10	12
6	10	5	3	8	7	15	25	22	14	10	12	6	8	21	9
11	10	11	2	16	6	5	8	5	19	24	10	15	10	17	18
8	8	2	1	8	10	12	13	7	8	15	6	25	6	28	3
13	14	1	3	8	10	7	18	6	9	11	4	7	10	17	20
8	5	4	3	11	11	6	14	7	13	18	9	9	15	15	17
7	11	3	4	8	14	12	18	8	5	6	6	12	7	31	8
11	5	5	4	10	11	7	19	11	15	6	6	8	11	10	19
5	19	7	4	6	11	15	24	10	14	3	8	20	13	8	10
18	18	9	3	16	5	5	10	3	9	5	2	12	8	7	7
10	9	6	2	5	12	9	10	14	18	7	16	21	10	22	14
4	13	2	1	7	9	5	24	16	12	9	7	9	10	8	20
11	10	5	1	9	6	3	10	10	9	12	14	11	10	16	7
6	9	4	1	6	8	7	19	5	11	8	14	13	15	8	13
6	8	7	1	5	6	5	7	12	16	5	14	21	17	7	15
2	8	6	4	8	14	6	21	19	13	11	17	22	7	2	25
5	11	7	1	7	9	4	17	8	16	2	4	17	13	9	20
5	10	11	2	16	8	5	11	5	9	7	10	6	5	12	12
4	4	2	0	6	11	5	15	10	13	11	8	14	5	5	11
9	10	1	2	4	9	1	25	12	10	9	18	9	31	7	13
5	13	4	2	8	9	9	11	8	9	5	12	9	23	9	17
8	2	8	1	3	5	1	14	3	14	12	14	3	6	9	24
8	8	2	3	7	7	6	16	7	12	7	6	7	9	22	11
4	14	9	2	11	17	8	11	5	12	6	10	4	19	10	12
5	13	4	8	9	13	9	9	6	15	9	13	28	4	13	12
6	6	3	4	11	8	11	16	6	14	10	18	4	12	6	12
8	8	5	2	7	7	4	14	10	24	10	5	2	7	11	9
6	12	2	4	12	10	8	10	8	13	8	17	13	7	15	21
6	17	2	3	4	3	3	22	6	12	9	18	1	7	4	20
6	11	9	3	3	9	4	4	6	3	8	6	20	6	11	16
7	10	2	2	5	6	10	16	6	5	12	4	10	7	13	15
8	5	3	4	4	8	6	15	7	15	8	15	11	7	10	10
7	9	7	2	8	8	2	8	9	10	4	16	7	8	7	14
7	5	4	2	3	6	5	13	5	19	2	6	12	10	18	10
1	5	2	1	10	12	3	9	13	13	6	8	18	9	6	15
10	7	4	2	8	9	5	16	7	15	6	15	5	15	4	12
5	4	8	6	1	10	7	17	5	12	7	19	9	11	8	13
3	3	5	0	2	11	1	13	7	9	8	5	4	17	7	11
8	9	3	2	2	9	4	10	6	10	6	5	8	8	19	0
4	11	2	2	3	9	3	17	5	9	9	14	8	12	15	10
4	14	5	3	3	4	2	11	5	10	4	7	3	9	8	5
8	8	3	3	6	6	5	15	3	10	6	7	5	17	9	7
7	10	4	4	2	10	3	8	6	10	3	11	6	10	20	4
7	12	7	1	2	7	6	13	4	8	7	9	10	20	7	8
6	9	3	2	1	6	2	15	6	6	8	6	8	10	14	12
14	8	5	3	4	11	9	14	9	16	6	11	17	8	25	16
3	8	4	4	6	6	1	10	4	10	3	3	17	9	11	6
6	11	3	1	3	7	3	17	3	11	8	13	6	4	10	14
1	3	5	1	1	11	6	8	7	9	7	6	6	6	3	6
2	10	2	5	4	6	4	9	4	15	3	7	12	4	7	8
11	5	7	3	5	7	5	15	6	4	4	3	6	14	6	7
2	5	7	1	2	8	6	12	6	7	6	5	7	17	9	10
5	6	9	2	5	4	1	7	3	13	3	3	14	16	6	14
3	10	10	0	6	6	1	10	4	10	3	10	14	2	6	7
3	15	4	5	10	10	3	10	2	7	2	9	9	11	15	15
3	6	2	6	3	5	3	16	7	6	4	8	2	12	7	14
9	4	1	6	7	2	3	9	2	14	5	8	12	8	15	6
5	10	2	0	4	6	3	8	7	12	2	9	5	5	6	8
7	6	4	1	2	5	1	7	7	16	5	8	6	3	3	8
7	12	4	1	3	6	5	17	1	6	2	7	16	12	3	5
7	14	1	1	6	7	6	8	2	9	4	5	8	14	8	10
5	5	7	5	4	6	7	18	5	14	5	8	18	9	13	15
4	4	6	2	7	5	3	4	2	13	3	8	13	3	18	19
7	7	7	1	3	7	7	15	4	5	3	11	6	4	10	8
3	9	4	4	3	9	3	13	2	3	4	5	5	21	6	15
3	4	8	1	8	9	4	13	3	9	6	6	7	7	14	16
3	9	4	0	5	7	1	8	5	17	5	9	14	3	6	5
3	1	2	3	4	3	3	17	6	16	3	3	13	4	6	6
3	5	7	3	1	10	4	8	5	11	4	7	14	10	9	10
3	4	1	6	1	1	6	16	6	6	4	6	13	5	4	9
2	4	1	1	3	6	1	7	1	5	5	4	4	4	12	7
8	8	4	2	6	6	0	6	2	6	3	4	7	5	8	11
2	13	2	1	4	1	2	4	3	2	4	14	2	4	7	8
2	1	4	2	3	7	4	9	6	9	2	6	4	6	5	17
2	14	2	1	4	4	1	10	2	10	2	7	4	12	5	6
2	0	3	6	1	2	0	12	5	4	4	14	4	4	8	15
1	11	2	1	6	7	2	6	3	8	1	4	4	5	10	7
2	8	3	3	7	7	1	11	2	10	9	6	11	5	10	18
6	8	0	2	5	3	1	5	7	7	6	5	4	9	2	6
1	8	3	5	3	2	4	11	3	10	8	14	14	12	6	7
4	9	3	5	7	3	3	17	4	9	6	8	6	8	6	7
1	2	5	0	2	6	4	7	6	7	3	5	3	5	5	6
0	5	6	2	3	8	2	8	3	7	2	7	10	6	9	5
2	7	4	2	2	2	4	18	8	6	3	6	3	11	2	5
1	0	2	1	1	5	3	8	4	3	3	8	3	8	4	6
2	3	2	0	2	5	3	9	2	7	3	7	5	6	3	4
5	6	2	2	5	3	6	11	4	5	3	7	14	10	7	10
2	1	0	1	2	6	1	11	1	6	2	5	0	9	3	7
3	3	7	2	0	3	3	7	0	9	1	3	3	11	3	4
2	7	2	2	2	5	3	5	3	9	4	1	9	6	7	11
5	2	3	2	4	1	2	9	4	6	3	5	8	7	7	6
1	3	3	1	3	5	0	11	2	10	4	5	9	7	3	4
1	3	2	0	5	1	1	8	3	6	0	7	8	6	6	9
1	2	5	0	3	5	0	9	2	5	4	5	1	3	3	5
5	8	3	3	2	7		10	1	9	2	6	1	5	6	4
0	6	5	0	3	2		7		10		7	4	8	2	8
2	2	1	2	4	0		6		8		5	7	5	3	4
1	6	5	0	6	4		11		4		3	10	5	7	1
5	5	4	3	3	3		10		11		6	1	2	6	14
2	3	1	1	2	4		10		9		5	11	6	3	7
1	5	3	0	4	1		10		6		2	5	12	4	15
2	7	1	1	2	8		12		5		3	2	5	3	3
2	2	6	3	3	7		11		3		7	7	14	2	2
2	2	4	2	3	5		5		8		3	5	6	4	11
2	4	4	1		5		4		6		7	13	4	4	3
2	10	2	2		3		5		7		2	9	3	2	7
3	4	2	1		4		3		8		6	6	6	4	7
2	5	2	2		3		13		7		10	3	3	4	7
1	5	2	0		5		3		9		3	0	1	4	9
3	11	2	2		3		8		7		9	8	6	1	5
4	5	1	1		3		4		10		3	4	8	2	7
1	3	0	1		2		12		4		4	9	3	1	6
1	1	5	0		4		7		3		7	4	5	1	7
0	1	4	1		1		9		6		1	5	4	4	3
2	3	2	2		3		6		4		8	5	6	2	5
3	6	6	2		7		20		8		6	3	3	4	7
0	4	3	1		3		6		6		9	9	10	1	5
3	3	3	1		5		5		5		5	2	6	1	5
1	6	1	1		2		7		2		12	0	4	1	3
0	3	5	2		3		8		5		2	5	2	5	4
0	5	1	0		4		4		9		4	0	2	0	2
1	5	1	2		5		6		8		6	7	5	3	5
2	6	3	2		2		5		0		8	7	4	2	0
2	2	2	0		4		12		4		5	2	3		9
1	4	0	1		0		5		4		3	5	6		1
1	6	1	0		6		8		6		1	5	4		7
0	2	2	1		8		9		8		4	1	5		5
2	1	0	2		1		7		2		1	2	2		3
	5	2	0		4		15		8		2	3	0		3
	8	2	0		1		7		5		3	8	4		9
	2	0	0		3		10		7		9	7	5		1
	3	2	0		3		4		4		3	9	10		9
	9	2	2		0		2		6		4	5	6		7
	3	2	0		2		4		5		3	1	2		9
	3	0	2		7		8		3		7	4	6		13
	7	1	2		3		3		3		5	4	6		2
	2	2	0		0		3		7		3	5	3		7
	2	1	0		5		2		1		3	3	2		0
	6	2	0		3		5		6		6	0	6		6
	2	0	0		3		7		5		1	5	4		3
	2	2	0		7		3		2		6	3	5		2
	6	2	1		5		10		7		7	0	12		7
	3	1	0		2		7		5		4	2	2		3
	1	1	0		2		5		4		4	8	9		8
	3	3	0		2		7		5		3		3		2
	3	2	1		4		6		6		4		3		6
	4	3	0		2		2		5		4		0		3
	3	4	0		1		5		6		2		4		1
	2		2		1		4		4		3		2		2
	2		1		2		1		1		1		4		2
	5		1		3		6		3		2		3		10
	4		1		3		5		1		2		5		3
	2		0		2		6		3		1		4		4
	2		2		2		7		6		4		3		3
	1		0		4		6		3		1		1		4
	3		0		4		8		0		5		4		3
	0		2		1		5		5		2		3		6
			4		3		5		2		3		4		0
			0		2		2		4		3		5		8
			0		1		0		3		1		5		3
					3		6		2		2		3		4
							3		0		3		11		3
							3		3		1		4		4
							1		0		5		8		4
							3		1		1		1		4
							2		2		3		5		4
							2		1		3		3		3
							3		6		4		4		2
									3		1		6		3
									3		2		3		7
									1		2		2		1
									2		3		3		4
									3		1		4		7
									1		4		1		7
									6		3		1		2
									1		0		3		5
									2		6		5		4
											7		3		3
											5		4		10
											1		3		5
											0		3		6
											2		2		2
													3		0
													1		5
													3		4
													4		1
													3		5
													1		2
													3		3
													5		2
													2		1
													4		4
													3		5
													1		3
													1		4
													3		5
													2		3
													4		3
													1		2
													1		2
													1		2
													2		1
													0		1
													2		0
													3		1
													1
													2
													0
													0
													1
													0
													2
													3
													1
													2
													2
													0
													0
													0
													0
													2
													1
													1
													2
													0
													2
													0
													0
													2
													3
													1
													0
													5

## Sheet: Fig. 1E ES-Hsp104 foci
Ethanol stress (8.5%) Hsp104 foci per cell
0 min				2.5 min		10 min		15 min		30 min		60 min		90 min		120 min		150 min		180 min
replicate 1	replicate 2	replicate 3	replicate 4	replicate 1	replicate 2	replicate 1	replicate 2	replicate 1	replicate 2	replicate 1	replicate 2	replicate 1	replicate 2	replicate 1	replicate 2	replicate 1	replicate 2	replicate 1	replicate 2	replicate 1	replicate 2
14	5	13	14	38	13	1	24	34	31	31	48	29	22	40	30	16	26	24	22		29
5	5	7	11	22	22	8	29	20	26	16	32	31	27	8	33	23	29	9	26		42
19	6	9	15	12	19	18	37	32	30	36	26	26	33	25	30	15	21	22	24		24
9	3	13	16	17	21	26	29	18	25	23	33	31	14	17	21	27	37	11	29		27
5	1	10	14	20	25	9	19	16	27	25	25	30	16	17	25	33	24	37	21		21
12	3	12	21	14	18	14	27	23	27	22	33	9	19	43	30	29	29	18	28		19
3	6	10	12	16	14	0	31	19	23	25	25	22	29	32	38	17	25	32	20		35
10	2	5	15	14	13	11	26	26	24	31	33	17	28	28	15	35	22	35	22		17
5	2	4	21	22	20	6	28	32	30	40	33	24	17	37	27	23	25	21	19		16
9	6	15	8	12	30	6	21	17	30	32	32	16	27	28	29	19	19	28	22		28
3	10	9	5	9	15	11	16	25	39	25	29	8	23	13	35	29	30	22	26		28
5	3	7	18	16	7	14	19	27	37	17	18	28	25	25	21	25	26	21	14		24
3	5	9	18	14	17	8	16	17	26	36	26	25	11	27	20	20	15	13	23		22
10	5	19	10	20	11	16	28	27	11	23	30	28	16	12	25	25	18	22	15		17
13	5	4	15	9	10	11	19	26	16	17	20	23	31	37	23	14	20	21	22		24
2	2	8	8	15	7	2	25	19	28	32	20	34	38	22	21	13	9	25	18		27
2	6	10	10	14	12	8	19	16	23	28	21	11	11	32	18	14	15	22	20		21
9	12	0	6	19	8	8	20	23	40	25	20	27	20	24	27	16	16	14	26		20
6	2	10	16	13	6	4	25	21	29	18	24	27	30	25	20	15	15	18	12		12
4	8	13	17	16	18	5	15	8	17	26	27	18	21	17	24	15	19	19	24		23
5	3	6	10	17	15	10	15	22	30	20	15	15	18	14	24	8	17	12	27		29
11	2	11	10	10	13	11	15	20	34	13	33	30	30	31	25	23	20	18	19		16
2	1	8	8	15	17	16	28	7	15	23	24	29	27	16	29	25	14	17	30		18
1	3	13	14	18	5	15	16	18	18	28	26	27	18	24	13	20	20	17	15		18
4	3	8	5	9	24	18	33	21	22	16	32	21	20	23	12	16	24	15	13		17
3	4	7	11	19	13	4	19	14	15	22	26	24	27	17	36	34	19	9	25		14
5	4	11	5	7	14	4	13	17	14	12	30	14	30	9	16	11	13	21	14		22
7	4	5	19	12	20	6	24	8	28	24	14	19	24	26	20	12	20	28	21		21
9	3	18	18	20	21	11	13	29	22	3	21	26	11	20	16	22	15	7	17		17
6	2	10	9	9	9	11	17	18	32	30	29	22	22	25	19	26	9	25	11		19
2	1	4	13	6	5	7	19	13	19	24	26	14	4	14	11	14	31	19	20		17
5	1	11	10	8	33	9	21	13	23	27	35	23	21	11	15	20	25	16	16		16
4	1	6	9	10	7	3	20	9	20	18	16	6	22	29	24	22	22	22	19		13
7	1	6	8	7	12	7	34	7	27	19	12	27	25	11	22	14	20	21	11		10
6	4	2	8	21	26	10	17	25	22	26	20	27	22	24	12	18	25	7	14		14
7	1	5	11	17	11	4	29	13	29	17	18	14	18	20	12	10	10	17	16		15
11	2	5	10	4	22	4	26	16	17	29	28	17	15	13	8	7	13	14	26		10
2	0	4	4	5	24	4	23	10	28	13	14	14	25	22	16	17	20	18	25		15
1	2	9	10	6	11	1	22	13	21	7	25	19	31	18	19	4	15	16	15		17
4	2	5	13	12	11	12	17	19	23	12	21	12	22	8	21	21	22	25	11		22
8	1	8	2	6	12	5	17	16	18	20	13	11	11	25	20	13	9	10	21		20
2	3	8	8	3	8	5	15	20	19	16	23	9	22	20	23	23	12	26	23		10
9	2	4	14	8	6	13	12	11	22	13	25	16	21	14	20	10	20	7	20		12
4	8	5	13	6	13	4	15	15	19	4	14	23	14	10	15	15	25	3	18		17
3	4	6	6	7	18	0	15	7	24	6	27	24	22	11	24	14	15	15	6		14
5	2	8	8	11	9	4	23	10	22	10	15	13	15	7	20	3	16	9	13		15
2	4	6	12	8	10	2	18	13	19	24	15	5	17	22	26	15	14	17	13		13
2	3	6	17	2	20	8	24	20	22	13	21	11	28	24	16	12	17	20	10		12
9	3	6	11	11	15	4	16	6	11	19	20	8	20	19	13	22	11	17	24		16
2	2	7	10	4	7	3	24	11	23	24	11	15	16	13	12	17	8	20	23		19
3	4	8	5	14	17	3	11	4	19	13	22	19	18	15	12	14	21	16	4		19
7	2	7	9	9	16	5	9	10	13	19	22	5	9	19	18	10	19	21	15		16
4	2	7	5	7	10	2	16	6	16	10	24	16	21	17	14	11	13	9	20		20
2	1	1	5	8	11	6	21	7	12	17	19	17	16	12	12	8	17	7	15		11
4	2	10	7	7	7	3	13	1	11	11	25	12	36	8	12	12	15	10	8		17
8	6	5	4	11	13	3	11	15	12	13	26	12	19	4	25	7	17	5	12		16
5	0	3	3	4	6	3	10	10	13	8	26	8	15	10	13	10	14	13	16		15
3	2	8	9	6	19	1	14	7	21	9	13	10	26	13	12	11	7	7	8		21
2	2	4	11	5	16	3	9	16	20	2	19	6	25	13	17	4	14	12	10		18
5	3	4	14	10	3	4	20	4	6	15	10	8	21	10	15	2	11	20	16		25
3	3	8	8	11	9	6	5	7	39	10	15	4	11	12	23	3	20	13	8		22
4	4	7	10	10	12	0	24	14	16	16	17	8	14	8	10	7	14	20	8		17
7	1	7	12	5	12	5	12	10	16	14	16	6	7	8	20	10	21	7	17		17
3	2	6	9	3	20	0	17	3	27	7	13	10	9	10	18	5	25	4	16		19
5	3	14	8	4	8	2	20	3	21	12	19	12	21	10	21	12	12	7	14		9
4	4	3	8	4	7	0	11	4	19	7	17	13	18	3	16	13	11	4	18		16
3	1	6	11	6	5	3	26	10	25	14	20	5	23	14	14	11	8	8	11		18
5	1	1	3	4	14	0	11	18	18	6	13	1	15	4	15	1	19	14	25		22
2	5	2	10	3	6	1	10	12	16	7	18	8	24	12	13	8	13	11	11		21
7	3	11	5	3	14	0	20	8	16	14	15	11	17	10	10	15	17	10	9		8
7	1	2	5	6	1	0	21	5	10	6	24	5	20	10	13	7	17	6	23		13
9	2	5	6	7	19	1	3	9	11	5	11	6	10	4	14	10	13	7	17		12
10	0	3	10	4	9	3	13	2	13	9	21	9	20	8	17	4	9	5	22		17
4	5	3	15	8	10	0	21	9	16	3	22	7	29	16	9	7	10	10	18		14
2	6	3	6	3	4	0	3	3	13	7	12	3	16	11	21	4	19	8	14		15
1	6	9	4	3	9	4	7	8	18	3	23	7	16	12	15	2	9	7	19		14
2	0	5	10	6	11		13	11	14	10	13	0	15	9	20	8	11	9	15		10
4	1	7	6	2	13		11	7	12	5	22	8	14	6	21	7	6	1	22		13
4	1	7	12	2	6		18	10	15	6	14	1	15	11	19	10	20	8	8		15
1	1	7	14	2	14		12	8	15	2	17		23	6	6	4	18	5	17		13
7	5	5	5	5	5		15	11	11	3	19		20	6	15	7	17	4	12		21
6	2	4	4	1	7		21	3	17	1	14		9	6	15	1	8	6	19		21
7	1	7	7	3	5		9	5	16	1	18		20	5	11	5	10	6	13		17
4	4	3	9	4	10		11	0	17	0	16		6	6	14	2	16	7	20		15
8	1	3	4		16		13	3	16	3	15		22	9	17	2	12	6	14		14
4	0	3	9		4		15	3	13		21		23	9	10	5	17	10	12		14
2	3	3	1		18		16	3	14		7		14	7	8	2	9	7	14		15
7	3	3	5		13		9	0	24		14		7	3	17	8	7	9	15		15
1	6	3	4		9		10	4	12		19		18	2	18	4	13	4	22		18
1	1	2	4		8		10	6	17		21		5	3	12	2	16	10	11		14
4	2	8	8		7		10	3	6		12		8	9	10	2	13	3	10		11
2	1	2	13		5		15	5	15		11		25		16		17	5	10		16
4	2	2	1		8		19		17		18		26		12		21	3	18		14
2	1	2	14		19		18		13		19		5		17		10	3	16		13
3	6	2	0		12		12		11		21		13		9		16	4	14		14
2	1	1	11		10		12		20		17		17		7		18	2	20		13
3	3	2	8		6		11		15		19		12		11		21		17		9
0	2	6	8		8		9		18		20		12		9		10		14		20
3	5	1	8		13		1		20		10		22		13		14		19		14
3	5	4	9		2		10		9		18		21		13		10		10		16
5	0	1	2		14		11		10		15		15		16		17		11		11
6	2	0	5		9		6		19		17		20		16		7		16		12
4	2	2	7		9		10		14		23		12		21		15		12		10
2	1	1	0		8		9		6		21		20		12		12		16		12
2	0	2	3		2		4		10		14		8		19		17		6		3
2	2	5	6		7		14		8		17		7		19		19		7		14
0	1	2	1		8		14		11		16		9		18		18		15		15
7	2	3	3		4		24		12		12		6		12		5		8		7
2	2	2	7		6		5		15		22		15		15		16		12		10
3	2	5	2		12		14		8		15		10		11		10		18		11
3	1	1	3		16		6		11		20		13		13		6		3		15
2	0	1	3		5		18		18		7		17		7		15		12		17
5	0	1	2		3		10		22		15		17		11		12		5		13
3	3	5	8		8		19		15		3		3		16		12		17		9
5	0	0	6		11		14		16		10		20		17		12		10		15
1	2	2	2		4		19		13		17		20		16		16		16		13
5	0	1	6		6		11		16		14		14		14		12		16		11
4	3	5	5		4		19		22		22		11		8		16		13		8
1	1	2	3		9		16		13		2		21		10		4		7		11
3	0	1	5		11		18		23		13		10		5		10		6		8
1	1	2	7		12		11		12		16		6		13		16		13		17
6	3	2	2		10		11		17		8		11		4		4		14		11
4	2	2	2		4		8		20		8		6		10		6		11		18
4	1	2	4		6		14		14		13		14		9		11		8		17
2	2	2	10		7		15		10		6		11		8		10		14		4
2	1	3	4		4		9		18		8		17		8		10		7		11
2	2	2	5		11		7		12		11		13		9		17		8		5
2	0	1	5		2		14		13		14		9		14		6		9		12
2	2	3	11		4		9		9		14		9		19		20		12		11
1	1	4	5		9		12		9		11		6		13		20		6		4
0	1	1	3		7		11		17		12		15		5		9		5		10
5	0	1	1		27		3		9		7		4		8		15		13		14
4	1	0	1		12		6		11		21		8		19		8		9		10
2	2	2	3		12		10		8		17		11		7		13		10		9
6	2	3	6		10		3		6		16		4		13		6		14		9
3	1	0	4		6		10		11		14		7		7		10		11		11
3	1	3	3		12		19		13		4		5		11		9		12		10
1	1	1	6		7		17		2		12		7		7		9		8		14
5	2	0	3		5		10		6		11		3		13		4		9		19
1	0	0	5		12		8		4		10		9		12		8		6		10
1	2	1	5		7		5		9		8		11		7		11		7		12
3	2	2	6		1		9		7		6		18		7		13		6		10
2	0	2	2		7		6		12		6		11		7		15		10		13
0	1	1	4		2		6		16		13		9		15		6		11		13
1	0	1	6		6		7		5		10		9		8		10		8		5
2	1	0	2		5		3		18		11		9		8		15		10		12
0	2	2	1		1		6		14		14		8		13		5		6		12
2	0		5		1		13		19		12		8		4		4		8		10
2	0		8		5		3		7		10		3		14		8		6		9
0	0		2		5		11		7		12		6		8		14		3		9
2	0		3		4		8		6		9		15		6		6		5		16
2	2		9		6		9		10		4		11		5		11		8		12
2	0		3		6		8		10		9		9		10		11		10		9
0	2		3		4		9		6		5		9		7		12		16		7
1	2		7		6		11		11		5		9		8		15		11		3
2	0		2		2		11		15		13		10		14		10		10		16
1	0		2		5		6		4		14		6		3		9		7		8
2	0		6		4		7		10		14		8		17		18		10		4
0	0		2		6		4		12		13		6		9		10		13		4
2	0		2		7		1		13		1		10		3		9		10		9
2	1		6		7		8		10		14		13		4		6		11		5
1	0		3		2		7		13		11		7		12		11		8		13
1	0		1		8		9		8		3		8		19		11		8		4
3	0		3		5		3		16		8		11		9		7		11		9
2	1		3		2		11		15		10		6		15		7		7		11
3	0		4		1		3		7		11		4		12		10		9		13
4	0		3		7		12		7		12		7		2		7		12		4
	2		2		6		13		15		9		4		14		5		9		6
	1		2		6		10		16		10		11		8		10		11		10
	1		5		8		6		10		6		12		13		4		1		7
	1		4		7		7		11		6		7		7		5		6		6
	0		2		9		7		13		5		15		5		10		7		9
	2		2		7		6		9		11		2		5		7		11		9
	0		1		4		11		11		9		5		5		8		10		9
	0		3		3		5		3		3		8		3		11		6		11
	2		0		6		7		8		7		11		13		4		2		5
	4				1		7		14		9		5		11		5		10		5
	0				5		14		4		8		7		12		13		6		9
	0				3		8		5		5		9		1		8		7		11
					3		2		8		1		3		11		5		7		4
					6		7		3		2		7		9		3		10		10
					8		1		7		13		5		10		8		4		8
					11		8		7		9		4		7		4		7		11
					2		12		9		4		5		8		3		10		5
					2		5		11		10		1		5		2		3		8
					6		7		10		6		2		9		5		3		6
					3		7		8		6		7		6		7		5		5
					3		8		9		6		5		14		2		6		6
					4		7		5		5		2		6		6		2		8
					5		6		7		11		9		9		7		1		7
					4		7		4		5		0		12		2		7		7
					2		12		2		6		4		7		5		2		8
					1		10		1		9		9		1		1		7		9
					1		3		1		4		1		9		3		2		8
					5		10		8		1		3		4		4		5		6
					4		5		3		2		10		5		6		7		7
					1		1		7		4		9		5		5		5		5
					6		6		3		5		3		5		8		5		3
					3		4		6		5		3		5		3		5		5
					1		3		5		6		7		7		5		3		4
					8		5		7		7		6		1		6		4		9
					1		12		4		7		6		12		7		5		8
					5		7		6		5		1		5		3		1		7
					0		5		8		5		6		7		3		4		6
					7		6		5		7		4		4		2		6		3
					0		2		10		2		5		3		4		9		4
					5		6		4		2		2		5		7		4		8
					1		8		10		0		3		7		1		9		7
					2		7		0		0		0		3		8		6		7
					1		0		1		2		0		3		3		0		7
					2		2		5		6		9		9		2		4		2
					0		2		6		4		4		5		7		8		6
					1		4		10		2		1		4		5		5		2
					3		1		5				2		4		3		2		1
					2		0		6				7		1		8		4		5
					2		0		3				5		4		3		0
					3		2		5						4		3		2
					0		2		3						7		7		5
					3		6		7						4				3
					2		3		4						7
					1		5		3						7
					2		4		5						1
					3		3		0						1
					5		1		2						4
					0		5								3
					1		8								3
							0
							4

## Sheet: Fig. 1E HS-Hsp104 foci vol
Heat Shock (39°C) Hsp104 foci vol (µm^3)
0				2.5		10		15		30		60		90
A:Y1	A:Y2	A:Y3	A:Y4	B:Y1	B:Y2	C:Y1	C:Y2	D:Y1	D:Y2	E:Y1	E:Y2	F:Y1	F:Y2	G:Y1	G:Y2
0.0190134	0.031689	0.084503		0.0335103	0.0147883	0.0335103	0.0443645	0.0232386	0.0274639	0.0042253	0.0063379	0.0063379	0.0042253	0.0335103	0.135205
0.0335103	0.0335103	0.0274639		0.0823906	0.211256	0.0335103	0.0335103	0.0084505	0.0335103	0.0063379	0.0190134	0.0042253	0.0335103	0.0105631	0.0359142
0.139429	0.0335103	0.0169009		0.0335103	0.0084505	0.0335103	0.0063379	0.0335103	0.0126757	0.0063379	0.0380269	0.0042253	0.0335103	0.0335103	0.422509
0.0335103	0.0335103	0.47321	0.0190134	0.0335103	0.0335103	0.0739403	0.0295765	0.0335103	0.0335103	0.0042253	0.0105631	0.0042253	0.0042253	0.124642	0.166893
0.0084505	0.152105	0.0063379	0.583067	0.103516	0.0335103	0.0063379	0.0335103	0.0211261	0.0084505	0.0126757	0.0335103	0.0063379	0.0042253	0.0063379	0.24717
0.0084505	0.0335103	0.0992913	0.0084505	0.0335103	0.0335103	0.135205	0.0335103	0.0169009	0.0190134	0.0335103	0.0335103	0.0335103	0.0042253	0.0443645	0.0042253
0.0335103	0.0335103	0.0084505	0.0654902	0.0335103	0.0335103	0.0335103	0.0042253	0.0633778	0.0335103	0.0084505	0.0042253	0.0042253	0.0084505	0.0654902	0.0335103
0.0335103	0.175343	0.0359142	0.0338017	0.0335103	0.0335103	0.0335103	0.0295765	0.0253514	0.0335103	0.0042253	0.0335103	0.0335103	0.0084505	0.0105631	0.084503
0.0335103	0.0063379	0.321108	0.464759	0.0335103	0.338008	0.0335103	0.111967	0.14788	0.0042253	0.0063379	0.0042253	0.0335103	0.0335103	0.0335103	0.15633
0.143654	0.061265	0.471097	0.0718279	0.0335103	0.0084505	0.0335103	0.0126757	0.0147883	0.0084505	0.0335103	0.0335103	0.0042253	0.0359142	0.0190134	0.403497
0.0335103	0.0335103	0.0335103	0.583067	0.0232386	0.0084505	0.0211261	0.0084505	0.0232386	0.0084505	0.0084505	0.0105631	0.0042253	0.160555	0.0063379	0.202806
0.031689	0.0190134	0.031689	0.0338017	0.0335103	0.0549274	0.0042253	0.0335103	0.0063379	0.0063379	0.0335103	0.0042253	0.0169009	0.0335103	0.0147883	0.0335103
0.0063379	0.0335103	0.0335103	0.160555	0.0147883	0.0335103	0.0335103	0.0042253	0.0063379	0.0105631	0.0063379	0.0063379	0.0335103	0.0042253	0.0335103	0.0335103
0.0335103	0.0042253	0.0887282	0.137317	0.0359142	0.0633778	0.0042253	0.0042253	0.0443645	0.0335103	0.0042253	0.0126757	0.0335103	0.264069	0.0760529	0.0232386
0.0992913	0.0042253	0.0190134	0.215481	0.0063379	0.0335103	0.0335103	0.0335103	0.0126757	0.0335103	0.0084505	0.0335103	0.0335103	0.0042253	0.0042253	0.0190134
0.0335103	0.0190134	0.0676026	0.0335103	0.0335103	0.0335103	0.0335103	0.0063379	0.0042253	0.0042253	0.0335103	0.0335103	0.0335103	0.0464771	0.0335103	0.0190134
0.0335103	0.0211261	0.0105631	0.270407	0.276745	0.0335103	0.0335103	0.0042253	0.0084505	0.0042253	0.0380269	0.0335103	0.0335103	0.0042253	0.061265	0.0335103
0.0190134	0.0335103	0.15633	0.521797	0.0335103	0.0084505	0.0335103	0.0335103	0.0335103	0.0042253	0.0042253	0.0335103	0.0335103	0.0359142	0.0084505	0.81121
0.0335103	0.0443645	0.0338017	0.5725	0.0335103	0.0335103	0.0335103	0.0464771	0.0335103	0.0042253	0.0105631	0.0042253	0.0335103	0.105629	0.0335103	0.0190134
0.0042253	0.0335103	0.114079	0.0335103	0.0335103	0.183793	0.0335103	0.0169009	0.0042253	0.0335103	0.0042253	0.0335103	0.0335103	0.128867	0.137317	0.188018
0.0335103	0.0335103	0.0697152	0.289421	0.0335103	0.0335103	0.0335103	0.137317	0.0042253	0.0042253	0.0126757	0.0295765	0.0335103	0.0126757	0.090841	0.120417
0.0335103	0.0105631	0.0823906	0.0929534	0.0802782	0.0063379	0.0335103	0.0042253	0.0335103	0.0042253	0.0084505	0.095066	0.0335103	0.0084505	0.0335103	0.0042253
0.0335103	0.251394	0.120417	0.0570397	0.0335103	0.0042253	0.0335103	0.0063379	0.0335103	0.0274639	0.0042253	0.0295765	0.0335103	0.0063379	0.109854	0.0335103
0.0335103	0.0335103	0.0823906	0.369696	0.0335103	0.0063379	0.0042253	0.0063379	0.0335103	0.084503	0.0063379	0.329558	0.0042253	0.0335103	0.0190134	0.0042253
0.0335103	0.0335103	0.217594	0.0464771	0.0335103	0.0147883	0.0335103	0.249282	0.0042253	0.0549274	0.0232386	0.0063379	0.0253514	0.0335103	0.0760529	0.0063379
0.274632	0.0335103	0.0063379	0.0929534	0.0042253	0.0335103	0.0042253	0.0335103	0.0485898	0.0042253	0.0105631	0.0084505	0.0295765	0.0042253	0.0335103	0.0063379
0.0335103	0.0335103	0.0335103	0.0570397	0.0063379	0.0528147	0.0335103	0.0147883	0.0335103	0.0335103	0.105629	0.177455	0.0335103	0.0042253	0.0042253	0.0335103
0.504897	0.0335103	0.0335103	0.0654902	0.0335103	0.0335103	0.0335103	0.0335103	0.0335103	0.0063379	0.0105631	0.293645	0.0042253	0.0335103	0.0335103	0.0042253
0.0335103	0.0335103	0.0718279	0.116192	0.0042253	0.0147883	0.0335103	0.0335103	0.0335103	0.0169009	0.0335103	0.0063379	0.0042253	0.0042253	0.0549274	0.0190134
0.0211261	0.0335103	0.120417	0.0253514	0.0063379	0.0063379	0.0335103	0.0126757	0.0063379	0.0718279	0.0335103	0.183793	0.0211261	0.0335103	0.0169009	0.0126757
0.0335103	0.0335103	0.369696	0.832339	0.0335103	0.0126757	0.253507	0.0042253	0.0335103	0.0063379	0.0295765	0.0676026	0.0676026	0.0063379	0.0147883	0.0443645
0.0042253	0.0401393	0.0105631	0.0359142	0.0042253	0.0335103	0.0335103	0.0190134	0.0042253	0.0105631	0.0042253	0.137317	0.0335103	0.0126757	0.0335103	0.299982
0.135205	0.0335103	0.0697152	0.0549274	0.0105631	0.0042253	0.0042253	0.0084505	0.031689	0.0042253	0.0335103	0.192244	0.0335103	0.0335103	0.0126757	0.0485898
0.29787	0.0335103	0.0335103	0.042252	0.0335103	0.0335103	0.0335103	0.0211261	0.0335103	0.215481	0.0169009	0.454197	0.0042253	0.0335103	0.0084505	0.149993
0.0063379	0.0335103	0.17323	0.0718279	0.0335103	0.118304	0.0335103	0.0335103	0.0887282	0.0274639	0.0335103	0.0697152	0.0042253	0.0335103	0.0549274	0.0274639
0.031689	0.0335103	0.0549274	0.0654902	0.0042253	0.0274639	0.0335103	0.126754	0.188018	0.0084505	0.0042253	0.0232386	0.0084505	0.0335103	0.0147883	0.0335103
0.0147883	0.0335103	0.0335103	0.226044	0.0042253	0.0335103	0.0063379	0.0802782	0.0380269	0.0335103	0.0335103	0.0084505	0.0335103	0.0335103	0.0063379	0.0295765
0.133092	0.0335103	0.555598	0.0105631	0.0063379	0.245057	0.0549274	0.031689	0.268294	0.0335103	0.0042253	0.0992913	0.0042253	0.0084505	0.0084505	0.0335103
0.0335103	0.0739403	0.637984	0.0549274	0.0335103	0.0042253	0.0335103	0.0147883	0.0084505	0.0105631	0.0335103	0.0063379	0.0042253	0.0335103	0.0335103	0.0335103
0.0335103	0.0335103	0.0042253	0.16478	0.0335103	0.0335103	0.0042253	0.101404	0.0335103	0.0335103	0.0042253	0.0105631	0.0335103	0.0335103	0.0042253	0.0335103
0.0295765	0.0335103	0.0718279	0.0169009	0.0335103	0.0335103	0.211256	0.0295765	0.0335103	0.0335103	0.0335103	0.0335103	0.0084505	0.0335103	0.0335103	0.0335103
0.0335103	0.0042253	0.0169009	0.0760529	0.0084505	0.0633778	0.0042253	0.17323	0.0335103	0.0042253	0.0042253	0.0295765	0.0042253	0.0063379	0.650664	0.0063379
0.359134	0.0335103	0.0676026	0.830222	0.0335103	0.0335103	0.0335103	0.0105631	0.0105631	0.0335103	0.0464771	0.0084505	0.0335103	0.0042253	0.0335103	0.0063379
0.0697152	0.0335103	0.0126757	0.354909	0.0335103	0.141542	0.0654902	0.0335103	0.335896	0.0063379	0.0760529	0.0335103	0.0335103	0.0253514	0.109854	0.0042253
0.0335103	0.0147883	0.105629	0.0126757	0.0335103	0.0063379	0.0126757	0.0042253	0.0105631	0.0718279	0.0169009	0.122529	0.0335103	0.0063379	0.0042253	0.0359142
0.0084505	0.084503	0.0591524	0.228156	0.0335103	0.0739403	0.0335103	0.0335103	0.0335103	0.0335103	0.0335103	0.042252	0.0335103	0.0335103	0.257732	0.061265
0.0335103	0.0335103	0.192244	0.0507022	0.0335103	0.0335103	0.0335103	0.0084505	0.128867	0.0335103	0.0335103	0.0335103	0.0335103	0.0335103	0.0063379	0.118304
0.0335103	0.0084505	0.0126757	0.0760529	0.0335103	0.0042253	0.0335103	0.0335103	0.0335103	0.0042253	0.0443645	0.0335103	0.0063379	0.0335103	0.211256	0.0335103
0.0126757	0.0335103	0.116192	0.095066	0.0335103	0.0335103	0.0063379	0.0042253	0.0042253	0.0335103	0.0335103	0.0335103	0.0335103	0.0335103	0.346458	0.090841
0.0042253	0.0401393	0.200693	0.60207	0.0335103	0.0335103	0.0335103	0.0380269	0.0042253	0.0063379	0.0335103	0.090841	0.0335103	0.0335103	0.285195	0.0335103
0.18168	0.0528147	0.918943	0.0253514	0.0042253	0.0042253	0.0063379	0.0549274	0.0335103	0.0063379	0.0042253	0.0042253	0.0335103	0.0335103	0.0335103	0.234494
0.0042253	0.0335103	0.0105631	0.0359142	0.0335103	0.0335103	0.0335103	0.0105631	0.0105631	0.0335103	0.0169009	0.0042253	0.0335103	0.0084505	0.0042253	0.0126757
0.0042253	0.0335103	0.0084505	0.095066	0.0335103	0.0147883	0.0335103	0.0169009	0.0211261	0.0042253	0.0335103	0.0335103	0.0335103	0.0042253	0.0335103	0.0929534
0.264069	0.0335103	0.0335103	0.0739403	0.0335103	0.371808	0.0335103	0.0380269	0.0359142	0.0335103	0.0335103	0.0335103	0.0335103	0.0335103	0.0528147	0.175343
0.0126757	0.845005	0.0147883	0.0781655	0.0335103	0.0335103	0.0335103	0.122529	0.0992913	0.0335103	0.0823906	0.031689	0.135205	0.095066	0.0335103	0.0105631
0.0507022	0.0401393	0.0802782	0.0802782	0.0335103	0.0443645	0.0335103	0.0335103	0.0335103	0.0063379	0.13098	0.0335103	0.118304	0.0042253	0.0084505	0.0232386
0.061265	0.0042253	0.0359142	0.291532	0.266182	0.0335103	0.0335103	0.0335103	0.0169009	0.0802782	0.0507022	0.0042253	0.0380269	0.0335103	0.0084505	0.0084505
0.0335103	0.0084505	0.312658	0.259844	0.0335103	0.0335103	0.160555	0.185906	0.0042253	0.0335103	0.0126757	0.0335103	0.0570397	0.0063379	0.0335103	0.0443645
0.107741	0.0335103	0.0335103	0.0887282	0.0084505	0.0335103	0.0295765	0.031689	0.0335103	0.0335103	0.0676026	0.0335103	0.109854	0.0760529	0.0084505	0.0335103
0.50701	0.0335103	0.0042253	0.0866157	0.0335103	0.0084505	0.0063379	0.0063379	0.0335103	0.0335103	0.0335103	0.0211261	0.0697152	0.0295765	0.0042253	0.0335103
0.0063379	0.18168	0.287308	0.217594	0.0335103	0.0084505	0.084503	0.0084505	0.0335103	0.0335103	0.0063379	0.0042253	0.397159	0.0042253	0.0335103	0.0232386
0.0335103	0.0042253	0.357021	0.0549274	0.0335103	0.0232386	0.0335103	0.0507022	0.0042253	0.0063379	0.0338017	0.0338017	0.0697152	0.0063379	0.0295765	0.0335103
0.0253514	0.0335103	0.0084505	0.0697152	0.283083	0.0126757	0.0971787	0.084503	0.0335103	0.0335103	0.0042253	0.24717	0.0335103	0.0335103	0.13098	0.0063379
0.0887282	0.0335103	0.0335103	0.111967	0.0335103	0.261957	0.0211261	0.0335103	0.0063379	0.0063379	0.0823906	0.0335103	0.0528147	0.0042253	0.0084505	0.109854
0.0359142	0.318996	0.0591524	0.545043	0.0335103	0.0042253	0.042252	0.0063379	0.0654902	0.0335103	0.118304	0.0253514	0.0380269	0.0335103	0.0335103	0.0335103
0.120417	0.0042253	0.0335103	0.0802782	0.0063379	0.0063379	0.0063379	0.0335103	0.0211261	0.0335103	0.0042253	0.0042253	0.0105631	0.0169009	0.0084505	0.0295765
0.0464771	0.0781655	0.0126757	0.111967	0.0485898	0.0084505	0.0338017	0.0063379	0.0063379	0.0338017	0.0042253	0.0063379	0.158443	0.0042253	0.0169009	0.0335103
0.0190134	0.0084505	0.25562	0.27252	0.0335103	0.0253514	0.0335103	0.0063379	0.0126757	0.0232386	0.0042253	0.0169009	0.0507022	0.0042253	0.0063379	0.0676026
0.0633778	0.0335103	0.0063379	0.0866157	0.0335103	0.0335103	0.0063379	0.0335103	0.0295765	0.0335103	0.0063379	0.0105631	0.0169009	0.291532	0.0042253	0.0169009
0.0232386	0.200693	0.487998	0.0718279	0.0335103	0.0042253	0.0335103	0.0464771	0.0335103	0.0654902	0.0274639	0.0147883	0.236606	0.0042253	0.0105631	0.116192
0.0335103	0.0335103	0.392934	0.0485898	0.0335103	0.0042253	0.0781655	0.0443645	0.116192	0.0084505	0.0042253	0.0232386	0.166893	0.0126757	0.0335103	0.179568
0.0335103	0.274632	0.0697152	0.111967	0.0335103	0.0084505	0.0335103	0.0126757	0.0084505	0.0211261	0.0335103	0.348571	0.0042253	0.0335103	0.0063379	0.0169009
0.665445	0.0147883	0.0570397	0.120417	0.061265	0.166893	0.0042253	0.0211261	0.0335103	0.0335103	0.0335103	0.0042253	0.0042253	0.236606	0.0335103	0.090841
0.0335103	0.0718279	0.154217	0.14788	0.0335103	0.0169009	0.0335103	0.0274639	0.0084505	0.293645	0.0335103	0.0274639	0.0335103	0.223931	0.0335103	0.0866157
0.0335103	0.0147883	0.0335103	0.160555	0.0335103	0.0147883	0.0042253	0.0570397	0.0335103	0.0042253	0.0042253	0.0295765	0.0654902	0.0105631	0.0335103	0.14788
0.0335103	0.0335103	0.0042253	0.213369	0.0335103	0.392934	0.0042253	0.0485898	0.0105631	0.0335103	0.0126757	0.175343	0.0084505	0.0063379	0.0042253	0.0063379
0.0253514	0.0570397	0.114079	0.318996	0.0042253	0.0147883	0.0335103	0.0335103	0.0063379	0.0084505	0.0063379	0.0335103	0.0169009	0.105629	0.0335103	0.0126757
0.0063379	0.0359142	0.0718279	0.0654902	0.114079	0.0042253	0.0063379	0.0335103	0.0781655	0.0063379	0.0063379	0.107741	0.0211261	0.0147883	0.0042253	0.0335103
0.0335103	0.17323	0.0063379	0.382371	0.0335103	0.0063379	0.0335103	0.0105631	0.0211261	0.0105631	0.0335103	0.0335103	0.0335103	0.0253514	0.0084505	0.0147883
0.031689	0.0335103	0.194356	0.0232386	0.0335103	0.0063379	0.0338017	0.0126757	0.0335103	0.0169009	0.0063379	0.0335103	0.0042253	0.109854	0.0335103	0.0335103
0.0169009	0.0335103	0.128867	0.0929534	0.0335103	0.0866157	0.0063379	0.101404	0.0335103	0.0105631	0.0084505	0.0105631	0.0105631	0.24717	0.0335103	0.0335103
0.0335103	0.0335103	0.0335103	0.378147	0.0929534	0.0042253	0.0042253	0.0485898	0.0042253	0.0887282	0.0147883	0.0063379	0.0335103	0.0380269	0.0084505	0.0105631
0.0042253	0.103516	0.0063379	0.0507022	0.0485898	0.0335103	0.0105631	0.0042253	0.0335103	0.0253514	0.0335103	0.0335103	0.0042253	0.0042253	0.0042253	0.0042253
0.0335103	0.0335103	0.105629	0.0042253	0.0169009	0.0084505	0.0126757	0.0084505	0.0335103	0.0042253	0.0335103	0.175343	0.0042253	0.0335103	0.0335103	0.0063379
0.240832	0.0335103	0.0401393	0.705593	0.0335103	0.0169009	0.0042253	0.0335103	0.0335103	0.042252	0.0105631	0.042252	0.0718279	0.547143	0.0147883	0.0335103
0.183793	0.0042253	0.0042253	0.0528147	0.0042253	0.0335103	0.0335103	0.0063379	0.0335103	0.0042253	0.0335103	0.310545	0.0335103	0.253507	0.0190134	0.101404
0.0335103	0.0042253	0.424622	0.111967	0.0063379	0.0335103	0.0335103	0.031689	0.0105631	0.13098	0.0335103	0.0042253	0.0335103	0.0781655	0.0169009	0.0042253
0.0105631	0.200693	0.0485898	0.128867	0.0084505	0.0335103	0.0335103	0.095066	0.0335103	0.0063379	0.0105631	0.0380269	0.0063379	0.380258	0.0335103	0.0253514
0.0211261	0.0380269	0.0335103	0.133092	0.0335103	0.0335103	0.0335103	0.0063379	0.0335103	0.0063379	0.0335103	0.0971787	0.0335103	0.0274639	0.0042253	0.166893
0.0335103	0.0063379	0.0169009	0.18168	0.0063379	0.084503	0.0335103	0.0335103	0.0147883	0.0042253	0.0335103	0.0105631	0.0042253	0.492223	0.0335103	0.0335103
0.0169009	0.536585	0.0084505	0.238719	0.0042253	0.0335103	0.0335103	0.0084505	0.0338017	0.0063379	0.0335103	0.0338017	0.0335103	0.0063379	0.0335103	0.259844
0.0335103	0.0338017	0.0042253	0.0528147	0.0042253	0.0169009	0.0335103	0.0335103	0.0335103	0.0992913	0.0126757	0.0335103	0.0335103	0.0335103	0.0105631	0.0042253
0.0335103	0.0335103	0.103516	0.090841	0.0042253	0.101404	0.0335103	0.0126757	0.0042253	0.16478	0.0335103	0.0084505	0.0042253	0.0335103	0.0676026	0.327445
0.0042253	0.175343	0.0063379	0.139429	0.0401393	0.0992913	0.0335103	0.0063379	0.0232386	0.0443645	0.0042253	0.0084505	0.0335103	0.0335103	0.0335103	0.0190134
0.0335103	0.0335103	0.0654902	0.259844	0.0335103	0.0335103	0.0335103	0.0335103	0.0211261	0.0464771	0.031689	0.031689	0.0084505	0.0887282	0.0335103	0.0084505
0.0169009	0.031689	1.29286	0.0443645	0.0335103	0.0126757	0.0042253	0.0126757	0.0042253	0.0335103	0.0335103	0.0335103	0.0063379	0.0633778	0.0464771	0.0063379
0.202806	0.0335103	0.109854	0.0253514	0.0591524	0.0126757	0.0335103	0.0042253	0.0335103	0.0042253	0.0335103	0.0335103	0.0126757	0.179568	0.0335103	0.0042253
0.042252	0.511236	0.232381	0.526021	0.304208	0.0042253	0.0335103	0.0823906	0.0042253	0.0126757	0.128867	0.0823906	0.0042253	0.0169009	0.0126757	0.0335103
1.05414	0.0335103	0.160555	0.0335103	0.0232386	0.0147883	0.0549274	0.0042253	0.0335103	0.0063379	0.0042253	0.0147883	0.0063379	0.0507022	0.0335103	0.0190134
0.0335103	0.0335103	0.329558	0.0211261	0.0063379	0.0063379	0.0084505	0.0866157	0.0105631	0.0042253	0.0042253	0.0971787	0.0335103	0.0335103	0.0760529	0.0232386
0.0335103	0.0335103	0.0992913	0.090841	0.141542	0.124642	0.0335103	0.0335103	0.0190134	0.0042253	0.0084505	0.143654	0.0063379	0.0335103	0.0335103	0.0084505
0.126754	0.278857	0.111967	0.0335103	0.0335103	0.0253514	0.0042253	0.0042253	0.0335103	0.0063379	0.031689	0.0042253	0.0042253	0.0063379	0.0126757	0.0126757
0.101404	0.0335103	0.0042253	0.0485898	0.0335103	0.0063379	0.0335103	0.0063379	0.0335103	0.0335103	0.0335103	0.133092	0.0335103	0.0485898	0.0042253	0.0335103
0.0042253	0.0335103	0.0335103	0.18168	0.0042253	0.0105631	0.0443645	0.0335103	0.0335103	0.0335103	0.0335103	0.0084505	0.0335103	0.0190134	0.0084505	0.0866157
0.061265	0.0211261	0.0126757	0.43096	0.0084505	0.0169009	0.0335103	0.0147883	0.0335103	0.0335103	0.0042253	0.0335103	0.0335103	0.0335103	0.27252	0.0042253
0.0335103	0.538695	0.0042253	0.175343	0.0147883	0.0042253	0.0335103	0.126754	0.0253514	0.0335103	0.031689	0.135205	0.0042253	0.0063379	0.954872	0.0042253
0.352795	0.0338017	0.217594	0.392934	0.0042253	0.0147883	0.0042253	0.0105631	0.0042253	0.0042253	0.0338017	0.0063379	0.325333	0.0335103	0.139429	0.0147883
0.0549274	0.0335103	0.0042253	0.0528147	0.031689	0.0335103	0.0335103	0.0359142	0.101404	0.0335103	0.0063379	0.0335103	0.101404	0.0335103	0.0866157	0.0147883
0.0335103	0.0335103	0.090841	0.171118	0.0335103	0.0063379	0.0335103	0.0253514	0.0335103	0.0063379	0.0042253	0.0335103	0.0105631	0.0335103	0.0338017	0.18168
0.124642	0.0464771	0.0335103	0.443635	0.0335103	0.0105631	0.0335103	0.0105631	0.0335103	0.0042253	0.0211261	0.0042253	0.0042253	0.0063379	0.133092	0.0190134
0.0084505	0.0274639	0.733059	0.420397	0.0335103	0.0126757	0.0335103	0.183793	0.0126757	0.0335103	0.0335103	0.0335103	0.145767	0.0042253	0.061265	0.0335103
0.0147883	0.0359142	0.0335103	0.0654902	0.0042253	0.0105631	0.0335103	0.0760529	0.0084505	0.0335103	0.0335103	0.0335103	0.0781655	0.0063379	0.0528147	0.0335103
0.0335103	0.0992909	0.0190134	0.204918	0.0042253	0.0042253	0.0335103	0.0335103	0.0335103	0.0335103	0.0335103	0.0126757	0.0042253	0.0335103	0.0190134	0.114079
0.0126757	0.0190134	0.251394	0.0443645	0.0042253	0.0335103	0.0126757	0.0335103	0.0147883	0.0335103	0.0084505	0.0063379	0.0823906	0.0335103	0.232381	0.342233
0.0335103	0.0335103	0.293645	0.141542	0.0042253	0.0063379	0.0063379	0.0169009	0.0084505	0.0084505	0.0042253	0.0190134	0.190131	0.0335103	0.0485898	0.0042253
0.475323	0.0335103	0.0274639	0.0126757	0.0335103	0.0042253	0.0335103	0.0335103	0.0084505	0.122529	0.0335103	0.0338017	0.0335103	0.0042253	0.0169009	0.0105631
0.0063379	0.061265	0.642204	0.0105631	0.0335103	0.0335103	0.0169009	0.0335103	0.0335103	0.0105631	0.0335103	0.0781655	0.0335103	0.0042253	0.095066	0.0063379
0.0335103	0.0335103	0.0335103	0.0718279	0.0335103	0.0335103	0.0335103	0.0063379	0.0335103	0.0211261	0.0335103	0.0042253	0.0335103	0.0335103	0.0042253	0.217594
0.192244	0.0335103	0.0211261	0.768956	0.0335103	0.0105631	0.0335103	0.0253514	0.0063379	0.0335103	0.0042253	0.0760529	0.0105631	0.259844	0.0190134	0.171118
0.0169009	0.0633774	0.16478	0.371808	0.0335103	0.0063379	0.0464771	0.185906	0.0335103	0.0335103	0.0063379	0.0042253	0.0335103	0.0338017	0.0380269	0.0105631
0.0335103	0.0105631	0.48166	0.0697152	0.0042253	0.0169009	0.0335103	0.0042253	0.0335103	0.0335103	0.0335103	0.0295765	0.0335103	0.0335103	0.0335103	0.084503
0.211256	0.0253512	0.116192	0.154217	0.0042253	0.095066	0.0335103	0.0063379	0.0105631	0.0335103	0.0335103	0.0190134	0.0084505	0.0335103	0.0335103	0.0084505
0.0335103	0.0443645	0.13098	0.0084505	0.0335103	0.0105631	0.0335103	0.0063379	0.0335103	0.0335103	0.0335103	0.0335103	0.0335103	0.0084505	0.0105631	0.0335103
0.0335103	0.0401393	1.13444	0.183793	0.0335103	0.0126757	0.0549274	0.105629	0.0335103	0.0335103	0.0335103	0.0335103	0.0105631	0.0126757	0.0335103	0.0335103
0.0126757	0.0335103	0.0359142	0.0929534	0.0042253	0.460534	0.0335103	0.0042253	0.0485898	0.0042253	0.0084505	0.0063379	0.0042253	0.0401393	0.0295765	0.0147883
0.0335103	0.0335103	0.249282	0.0992913	0.0084505	0.0633778	0.0335103	0.145767	0.0274639	0.0169009	0.0042253	0.0042253	0.0042253	0.0253514	0.0335103	0.188018
0.0335103	0.0335103	0.120417	0.0654902	0.120417	0.0549274	0.0443645	0.0063379	0.0274639	0.0042253	0.0335103	0.0380269	0.0042253	0.0335103	0.0105631	0.0063379
0.0335103	0.061265	0.0676026	0.234494	0.0335103	0.0105631	0.0105631	0.0084505	0.0169009	0.0126757	0.0042253	0.154217	0.0335103	0.0169009	0.0335103	0.0063379
0.0485898	0.0335103	0.0335103	0.0781655	0.0335103	0.0401393	0.135205	0.0147883	0.0971787	0.0042253	0.0274639	0.0823906	0.0335103	0.0335103	0.0335103	0.090841
0.0042253	0.0126757	0.207031	0.0443645	0.0335103	0.0105631	0.0335103	0.0084505	0.333783	0.0084505	0.0335103	0.0464771	0.0105631	0.0380269	0.0335103	0.447859
0.0335103	0.0760529	0.0232386	0.0549274	0.0335103	0.175343	0.0042253	0.15633	0.0335103	0.0063379	0.0335103	0.128867	0.0335103	0.0335103	0.0335103	0.0335103
0.0760529	0.0359142	0.209143	0.0253514	0.179568	0.0084505	0.0335103	0.0169009	0.0063379	0.162668	0.0169009	0.0042253	0.0335103	0.0042253	0.0359142	0.0063379
0.0335103	0.0335103	0.0063379	0.0549274	0.0335103	0.0147883	0.0084505	0.570385	0.0063379	0.0335103	0.0929534	0.0335103	0.0335103	0.0335103	0.0063379	0.388709
0.0335103	0.0335103	0.15633	0.120417	0.0335103	0.0042253	0.0335103	0.17323	0.0105631	0.0335103	0.031689	0.0042253	0.0335103	0.0335103	0.152105	0.18168
0.376034	0.0335103	0.160555	0.245057	0.0335103	0.0335103	0.0063379	0.443635	0.0084505	0.0063379	0.0823906	0.0042253	0.0335103	0.0335103	0.0084505	0.166893
0.0042253	0.278857	0.0042253	0.192244	0.0042253	0.0042253	0.0126757	0.133092	0.0335103	0.0570397	0.0042253	0.0126757	0.0042253	0.0335103	0.0084505	0.084503
0.143654	0.0084505	0.0507022	0.251394	0.0126757	0.0335103	0.0335103	0.177455	0.0335103	0.0232386	0.0084505	0.0084505	0.0126757	0.0335103	0.0042253	0.0253514
0.0211261	0.0335103	0.0654902	0.149993	0.128867	0.291532	0.0335103	0.0084505	0.0338017	0.128867	0.042252	0.0042253	0.0335103	0.0335103	0.0335103	0.382371
0.0335103	0.0042253	0.458422	0.17323	0.0633778	0.0335103	0.0335103	0.0335103	0.0335103	0.0042253	0.0042253	0.139429	0.0335103	0.0084505	0.0335103	0.0739403
0.0063379	0.0335103	0.0570397	0.090841	0.0042253	0.0042253	0.0063379	0.0823906	0.0335103	0.0105631	0.0042253	0.0335103	0.0042253	0.0335103	0.0126757	0.371808
0.0190134	0.0211261	0.0335103	0.116192	0.0084505	0.0042253	0.0781655	0.0335103	0.0335103	0.0042253	0.0335103	0.0105631	0.0105631	0.0042253	0.0042253	0.0253514
0.0084505	0.0335103	0.274632	0.061265	0.0335103	0.0063379	0.0335103	0.0654902	0.0335103	0.0063379	0.0335103	0.0253514	0.0042253	0.0335103	0.0169009	0.0335103
0.0335103	0.0335103	0.0084505	0.310545	0.0335103	0.0992913	0.0335103	0.139429	0.0190134	0.0335103	0.0169009	0.0335103	0.0335103	0.0676026	0.0335103	0.13098
0.0042253	0.549265	0.0274639	0.114079	0.0335103	0.0887282	0.0335103	0.399271	0.0338017	0.0105631	0.0063379	0.0253514	0.0084505	0.0335103	0.0335103	0.266182
0.139429	0.0042253	0.0335103	0.0063379	0.0042253	0.031689	0.0063379	0.678131	0.0084505	0.0232386	0.0485898	0.0359142	0.0335103	0.0042253	0.0676026	0.17323
0.312658	0.0335103	0.424622	0.185906	0.0335103	0.0042253	0.0335103	0.266182	0.0335103	0.0063379	0.477435	0.061265	0.0335103	0.0823906	0.0105631	0.245057
0.0105631	0.0335103	0.0971787	0.914721	0.0084505	0.0063379	0.0335103	0.0042253	0.0063379	0.0335103	0.0335103	0.0084505	0.0335103	0.0338017	0.0274639	0.604193
0.143654	0.0335103	0.166893	0.475322	0.0042253	0.0335103	0.0335103	0.219706	0.0335103	0.0084505	0.0335103	0.0335103	0.0169009	0.0335103	0.0042253	0.716148
0.0485898	0.289419	0.0633778	0.0485898	0.101404	0.149993	0.0335103	0.061265	0.0063379	0.0335103	0.0335103	0.0335103	0.0063379	0.0084505	0.0211261	0.266182
0.204918	0.0335103	0.318996	0.483773	0.0335103	0.0042253	0.0335103	0.0335103	0.0063379	0.0063379	0.0335103	0.042252	0.0335103	0.0211261	0.0105631	0.0063379
0.0063379	0.0335103	0.749956	0.0654902	0.0063379	0.0274639	0.0105631	0.0211261	0.0063379	0.0335103	0.0063379	0.0380269	0.0335103	0.0126757	0.0335103	0.0084505
0.0126757	0.0507022	0.0380269	0.18168	0.0335103	0.0190134	0.0335103	0.0335103	0.0084505	0.042252	0.0335103	0.031689	0.0042253	0.0169009	0.0335103	0.401384
0.454197	0.0335103	0.0126757	0.0190134	0.0063379	0.0190134	0.0335103	0.0042253	0.0781655	0.031689	0.0147883	0.0253514	0.0042253	0.090841	0.0335103	0.0232386
0.0335103	0.633764	0.31477	0.418284	0.0335103	0.0335103	0.0335103	0.0335103	0.0063379	0.0401393	0.0084505	0.0190134	0.0335103	0.468985	0.0211261	0.386597
0.0335103	0.0253512	0.0063379	0.342233	0.0063379	0.0401393	0.0042253	0.0335103	0.0042253	0.0169009	0.0335103	0.16478	0.0335103	0.0084505	0.0190134	0.251394
0.0335103	0.0335103	0.13098	0.139429	0.0335103	0.352795	0.0335103	0.0335103	0.0335103	0.0335103	0.0042253	0.0335103	0.0335103	0.0335103	0.0295765	0.105629
0.17323	0.0253512	0.0190134	0.139429	0.0335103	0.0084505	0.0335103	0.0335103	0.0169009	0.0335103	0.0335103	0.0169009	0.0042253	0.0335103	0.0042253	0.192244
0.0335103	0.0335103	0.0971787	0.0992913	0.0335103	0.0335103	0.0335103	0.0042253	0.0063379	0.0063379	0.0042253	0.0274639	0.0042253	0.0063379	0.0802782	0.0380269
0.0335103	0.487998	0.0359142	0.0992913	0.0335103	0.0380269	0.0042253	0.0084505	0.0126757	0.0295765	0.0335103	0.0105631	0.0335103	0.0147883	0.0335103	0.128867
0.0274639	0.0335103	0.031689	0.209143	0.0335103	0.17323	0.0063379	0.0335103	0.0042253	0.0105631	0.0084505	0.0823906	0.0335103	0.042252	0.0335103	0.682358
0.0335103	0.0335103	0.0549274	0.0401393	0.0335103	0.031689	0.0042253	0.0063379	0.0335103	0.0380269	0.0633778	0.0126757	0.0042253	0.0147883	0.0190134	0.179568
0.0739403	0.0335103	0.152105	0.0507022	0.0063379	0.0042253	0.107741	0.0042253	0.0335103	0.200693	0.0335103	0.0126757	0.0063379	0.0676026	0.0147883	0.211256
0.0335103	0.0335103	0.0042253	0.105629	0.0739403	0.0485898	0.0335103	0.0211261	0.0042253	0.0084505	0.0063379	0.0084505	0.0335103	0.0042253	0.0335103	0.162668
0.0335103	0.0335103	0.215481	0.0042253	0.0232386	0.107741	0.0335103	0.0335103	0.0105631	0.0380269	0.0063379	0.0335103	0.0335103	0.223931	0.306321	0.154217
0.0042253	0.0335103	0.190131	0.143654	0.0335103	0.0335103	0.0335103	0.31477	0.0084505	0.111967	0.031689	0.0335103	0.0042253	0.0063379	0.0042253	0.095066
0.238719	0.0335103	0.0570397	0.25562	0.0335103	0.0401393	0.0042253	0.0335103	0.0063379	0.0147883	0.0042253	0.0335103	0.0042253	0.0335103	0.042252	0.105629
0.0335103	0.0335103	0.316883	0.380258	0.177455	0.0042253	0.0335103	0.114079	0.0335103	0.152105	0.0042253	0.0063379	0.0042253	0.15633	0.0335103	0.0549274
0.0042253	0.0335103	0.143654	0.0190134	0.0063379	0.0335103	0.0335103	0.0232386	0.0335103	0.0274639	0.0042253	0.0591524	0.0063379	0.0042253	0.0063379	0.166893
0.095066	0.0042253	0.0147883	0.0549274	0.0335103	0.0335103	0.0126757	0.061265	0.0335103	0.0335103	0.0335103	0.0335103	0.0335103	0.0335103	0.0084505	0.194356
0.111967	0.133092	0.836561	0.0063379	0.0335103	0.0147883	0.0633778	0.0084505	0.0335103	0.0335103	0.0335103	0.0866157	0.0335103	0.0042253	0.0232386	0.0295765
0.0570397	0.0335103	0.0169009	0.0781655	0.0335103	0.095066	0.0042253	0.0084505	0.0335103	0.095066	0.0335103	0.0190134	0.0335103	0.0335103	0.137317	0.0335103
0.0335103	0.0335103	0.0042253	0.0971787	0.0335103	0.0126757	0.0042253	0.0676026	0.0147883	0.25562	0.0335103	0.0042253	0.0042253	0.0105631	0.0042253	0.0718279
0.365471	0.0335103	0.042252	0.984434	0.0042253	0.192244	0.0126757	0.0063379	0.0042253	0.0335103	0.0335103	0.0335103	0.0335103	0.0335103	0.0105631	0.0084505
0.0190134	0.0063379	0.215481	0.0971787	0.0335103	0.0335103	0.0335103	0.0335103	0.0335103	0.0335103	0.0335103	0.0063379	0.031689	0.0084505	0.0063379	0.133092
0.0335103	0.0633774	0.0042253	0.0866157	0.0042253	0.0549274	0.0084505	0.0042253	0.0274639	0.0335103	0.0063379	0.0335103	0.0335103	0.0295765	0.0084505	0.177455
0.0253514	0.0335103	0.152105	0.031689	0.0042253	0.0190134	0.0084505	0.0335103	0.0335103	0.0105631	0.0042253	0.0335103	0.0042253	0.0063379	0.0335103	0.352795
0.17323	0.0335103	0.0335103	0.13098	0.0335103	0.0084505	0.0335103	0.0338017	0.0335103	0.0063379	0.0335103	0.0274639	0.031689	0.0274639	0.0335103	0.0147883
0.0335103	0.0335103	0.0335103	0.0042253	0.101404	0.0063379	0.278858	0.0335103	0.0335103	0.185906	0.0063379	0.0063379	0.0063379	0.0042253	0.0380269	0.0042253
0.0335103	0.0422517	0.0335103	0.0380269	0.0338017	0.0335103	0.0335103	0.0335103	0.0063379	0.0335103	0.0126757	0.166893	0.0042253	0.0063379	0.0335103	0.166893
0.0335103	0.0335103	0.386597	0.0971787	0.0335103	0.0084505	0.0401393	0.0042253	0.0105631	0.0335103	0.0401393	0.0084505	0.0335103	0.0633778	0.0335103	0.306321
0.0335103	0.530255	0.0335103	0.403497	0.0335103	0.0760529	0.0211261	0.0042253	0.0063379	0.0063379	0.0042253	0.0760529	0.0464771	0.0335103	0.0335103	0.0335103
0.109854	0.0335103	0.0335103	0.0338017	0.0335103	0.0105631	0.0335103	0.0042253	0.061265	0.0211261	0.0063379	0.0147883	0.0042253	0.0063379	0.278858	0.0335103
0.0335103	0.0528147	0.0335103	0.0295765	0.0335103	0.0253514	0.0335103	0.0335103	0.0042253	0.0042253	0.0335103	0.0063379	0.0335103	0.0063379	0.0042253	0.299982
0.0549274	0.0042253	0.0633778	0.190131	0.0042253	0.207031	0.194356	0.0190134	0.0232386	0.0335103	0.0335103	0.0126757	0.0084505	0.0485898	0.0042253	0.58728
0.0335103	0.0042253	0.128867	0.249282	0.0335103	0.0042253	0.0063379	0.0335103	0.0042253	0.0335103	0.0335103	0.0105631	0.0335103	0.0802782	0.0042253	0.031689
0.0335103	0.0335103	0.0335103	0.0401393	0.0335103	0.0126757	0.0042253	0.363359	0.0042253	0.0335103	0.0335103	0.0105631	0.0335103	0.0105631	0.0335103	0.51546
0.0042253	0.0042253	0.17323	0.18168	0.0335103	0.232381	0.0335103	0.0335103	0.0042253	0.0335103	0.0042253	0.0063379	0.0335103	0.308433	0.0042253	0.0063379
0.0335103	0.0063379	0.0042253	0.0105631	0.0335103	0.0335103	0.0633778	0.0633778	0.0084505	0.0232386	0.0042253	0.135205	0.0335103	0.0992913	0.0335103	0.0335103
0.0335103	0.221819	0.0232386	0.103516	0.0335103	0.0084505	0.0105631	0.545043	0.0570397	0.0042253	0.0335103	0.0063379	0.0084505	0.226044	0.0042253	0.122529
0.251394	0.0422517	0.0380269	0.0443645	0.0335103	0.0063379	0.0063379	0.0401393	0.0335103	0.162668	0.0335103	0.0335103	0.0335103	0.0190134	0.0335103	0.137317
0.0335103	0.0335103	0.0971787	0.0866157	0.0105631	0.0335103	0.0335103	0.0190134	0.0335103	0.0335103	0.0971787	0.0126757	0.0042253	0.188018	0.0105631	0.526021
0.0126757	0.0338017	0.756281	0.0802782	0.0335103	0.0335103	0.0335103	0.0169009	0.0126757	0.061265	0.0042253	0.0063379	0.0042253	0.0654902	0.0042253	0.0718279
0.0335103	0.0654902	0.190131	0.504897	0.0335103	0.0105631	0.0084505	0.0169009	0.0335103	0.0464771	0.0147883	0.0335103	0.0335103	0.0063379	0.0335103	0.0781655
0.0335103	0.0335103	0.0823906	0.221819	0.042252	0.143654	0.0042253	0.0042253	0.031689	0.0335103	0.0335103	0.0335103	0.0084505	0.124642	0.084503	0.289421
0.0042253	0.0105631	0.0570397	0.042252	0.0042253	0.0335103	0.118304	0.0063379	0.0042253	0.0335103	0.0147883	0.0063379	0.0042253	0.526021	0.0042253	0.135205
0.0335103	0.120417	0.135205	0.154217	0.0335103	0.0335103	0.0335103	0.0084505	0.0063379	0.0147883	0.0042253	0.0042253	0.0063379	0.357021	0.103516	0.245057
0.0042253	0.0295765	0.169005	0.606304	0.0042253	0.0335103	0.154217	0.0042253	0.0147883	0.0084505	0.0274639	0.0126757	0.0042253	0.0485898	0.0335103	0.0335103
0.101404	0.0570397	0.0802782	0.111967	0.0335103	0.0063379	0.0335103	0.0335103	0.0042253	0.0335103	0.0084505	0.0105631	0.0335103	0.0105631	0.0335103	0.232381
0.0335103	0.0084505	0.223931	0.0739403	0.0335103	0.0105631	0.0084505	0.0335103	0.0335103	0.0335103	0.0335103	0.0335103	0.0335103	0.158443	0.0335103	0.232381
0.0335103	0.0105631	0.114079	0.0507022	0.0335103	0.0042253	0.0042253	0.0147883	0.0335103	0.0335103	0.0063379	0.0126757	0.0335103	0.0211261	0.0335103	0.0063379
0.0335103	0.0485894	0.0823906	0.042252	0.0126757	0.0335103	0.0591524	0.0084505	0.0211261	0.0335103	0.0335103	0.0335103	0.0335103	0.0335103	0.0126757	0.409835
0.0335103	0.0781655	0.175343	0.084503	0.0335103	0.226044	0.0335103	0.0042253	0.0335103	0.0105631	0.0169009	0.0084505	0.0147883	0.0042253	0.0335103	0.344345
0.0063379	0.177455	0.0359142	0.329558	0.230269	0.0232386	0.0335103	0.0232386	0.0063379	0.0335103	0.0169009	0.0190134	0.0335103	0.0063379	0.0335103	0.283083
0.0335103	0.0335103	0.179568	0.169005	0.109854	0.0105631	0.0633778	0.0335103	0.0063379	0.0507022	0.0063379	0.0042253	0.0042253	0.0464771	0.0335103	0.0232386
0.0335103	0.0464771	0.756281	0.280969	0.0335103	0.0335103	0.0042253	0.0335103	0.0105631	0.0084505	0.226044	0.0063379	0.0335103	0.0335103	0.0338017	0.0335103
0.0105631	0.0274639	0.137317	0.276745	0.0063379	0.149993	0.0335103	0.0464771	0.0042253	0.0335103	0.0126757	0.0335103	0.0335103	0.0335103	0.0335103	0.0335103
0.0335103	0.0464771	0.84291	0.154217	0.0335103	0.194356	0.0335103	0.204918	0.0335103	0.0335103	0.0335103	0.0042253	0.0042253	0.0063379	0.0253514	0.0063379
0.0739403	0.0335103	0.0335103	0.122529	0.0084505	0.0570397	0.0335103	0.0105631	0.0335103	0.0654902	0.0169009	0.0063379	0.0335103	0.0042253	0.259844	0.0190134
0.0335103	0.0380269	0.16478	0.137317	0.0190134	0.061265	0.0335103	0.103516	0.0335103	0.0335103	0.0169009	0.0335103	0.0335103	0.0063379	0.0253514	0.756281
0.0335103	0.0380269	0.185906	0.090841	0.0335103	0.185906	0.0335103	0.0042253	0.0335103	0.0335103	0.0335103	0.0042253	0.0335103	0.0063379	0.0042253	0.0335103
0.0335103	0.0169009	0.101404	0.0295765	0.0335103	0.242945	0.0335103	0.0591524	0.0335103	0.0063379	0.0718279	0.0042253	0.0335103	0.0676026	0.0105631	0.0335103
0.0335103	0.0443645	0.158443	0.166893	0.0335103	0.0147883	0.0063379	0.0718279	0.0295765	0.0359142	0.0335103	0.0126757	0.0042253	0.0084505	0.0063379	0.090841
0.0335103	0.149993	0.109854	0.378147	0.0335103	0.0042253	0.0335103	0.111967	0.0063379	0.0359142	0.0697152	0.0063379	0.0335103	0.0105631	0.0335103	0.0126757
0.0335103	0.0591524	0.0335103	0.0126757	0.0335103	0.350683	0.0335103	0.042252	0.0335103	0.0147883	0.084503	0.0335103	0.0335103	0.0126757	0.0335103	0.0335103
0.0084505	0.0335103	0.0211261	0.0443645	0.0335103	0.0169009	0.0335103	0.0464771	0.0335103	0.0169009	0.0169009	0.0335103	0.0335103	0.0335103	0.124642	0.0335103
0.0063379	0.0335103	0.141542	0.0042253	0.171118	0.0633778	0.0335103	0.0971787	0.0335103	0.0084505	0.0063379	0.0063379	0.0084505	0.0507022	0.0335103	0.0335103
0.0335103	0.0654902	0.152105	0.0739403	0.0042253	0.084503	0.0335103	0.295758	0.090841	0.0084505	0.0335103	0.0211261	0.0335103	0.0063379	0.0042253	0.0335103
0.209143	0.0335103	0.0105631	0.521797	0.0042253	0.0335103	0.0335103	0.0335103	0.0507022	0.0335103	0.0335103	0.0084505	0.0335103	0.0190134	0.0042253	0.0042253
0.0335103	0.0042253	0.137317	0.13098	0.185906	0.0335103	0.0335103	0.0063379	0.114079	0.0335103	0.0335103	0.422509	0.0335103	0.0211261	0.221819	0.0335103
0.0042253	0.690807	0.0760529	0.509122	0.0335103	0.0105631	0.0084505	0.0335103	0.0042253	0.0042253	0.0335103	0.0084505	0.0042253	0.0084505	0.0084505	0.0042253
0.0335103	0.0147883	0.221819	0.0084505	0.401384	0.0169009	0.0335103	0.109854	0.0335103	0.0335103	0.0335103	0.0084505	0.0084505	0.0084505	0.0335103	0.0042253
0.0335103	0.0335103	0.158443	0.0823906	0.0335103	0.0718279	0.0063379	0.0335103	0.0063379	0.0335103	0.0211261	0.0335103	0.0335103	0.0063379	0.0295765	0.0335103
0.0335103	0.0335103	0.124642	0.43096	0.0335103	0.0042253	0.160555	0.0190134	0.0042253	0.0042253	0.0042253	0.0211261	0.0335103	0.0971787	0.0169009	0.0335103
0.0335103	0.0253512	0.0063379	0.0823906	0.0105631	0.0335103	0.0042253	0.0042253	0.0335103	0.0042253	0.0335103	0.0042253	0.0042253	0.0169009	0.251394	0.0549274
0.376034	0.0335103	0.0528147	0.109854	0.0084505	0.0335103	0.0042253	0.0042253	0.0063379	0.0335103	0.0335103	0.0335103	0.0063379	0.0063379	0.0063379	0.0042253
0.0042253	0.0253512	0.378147	0.141542	0.0335103	0.542916	0.0084505	0.0042253	0.0063379	0.0147883	0.139429	0.0335103	0.0211261	0.0126757	0.0507022	0.0781655
0.0335103	0.0335103	0.114079	0.0718279	0.0971787	0.354909	0.0335103	0.0147883	0.0147883	0.0335103	0.0253514	0.0335103	0.0042253	0.0042253	0.251394	0.15633
0.0042253	0.0147883	0.0126757	0.0971787	0.0335103	0.0232386	0.0147883	0.657003	0.0042253	0.152105	0.0335103	0.0126757	0.0063379	0.0042253	0.0105631	0.14788
0.0335103	0.0253512	0.0042253	0.24717	0.314771	0.0042253	0.0335103	0.0802782	0.0190134	0.0042253	0.0190134	0.137317	0.042252	0.0063379	0.766847	0.367584
0.0992913	1.04991	0.576728	0.0760529	0.0335103	0.0335103	0.0335103	0.0232386	0.0084505	0.0042253	0.0570397	0.0335103	0.0042253	0.0335103	0.618966	0.428847
0.0335103	0.0802782	0.0335103	0.111967	0.0295765	0.0084505	0.0274639	0.228156	0.0042253	0.137317	0.0042253	0.0063379	0.0042253	0.0335103	0.103516	0.0042253
0.139429	0.0335103	0.302095	0.133092	0.0042253	0.0274639	0.0335103	0.0126757	0.0042253	0.0147883	0.0335103	0.0335103	0.0335103	0.0063379	0.0105631	1.01401
0.0335103	0.0697152	0.0335103	0.139429	0.0335103	0.179568	0.0335103	0.0760529	0.0063379	0.0042253	0.0042253	0.0335103	0.0335103	0.0485898	0.109854	0.031689
0.0042253	0.0295765	0.0042253	0.0992913	0.0335103	0.0126757	0.0335103	1.0457	0.107741	0.0169009	0.0335103	0.0042253	0.0335103	0.240832	0.0591524	0.0338017
0.0335103	0.194356	0.0654902	0.145767	0.0335103	0.528135	0.234494	0.0654902	0.0042253	0.0042253	0.0335103	0.25562	0.0335103	0.0063379	0.209143	0.0042253
0.0338017	0.462647	0.530255	0.215481	0.0169009	0.0042253	0.0654902	0.0591524	0.139429	0.0338017	0.0042253	0.0190134	0.0335103	0.270407	0.0802782	0.0147883
0.0335103	0.0335103	0.276745	0.15633	0.0335103	0.0335103	0.0063379	0.0253514	0.0042253	0.031689	0.0335103	0.042252	0.0042253	0.0274639	0.0232386	0.604193
0.0335103	0.0380269	0.114079	0.0992913	0.0335103	0.0335103	0.0760529	0.0211261	0.0042253	0.0335103	0.0335103	0.0126757	0.0042253	0.0042253	0.0063379	0.152105
0.0335103	0.0084505	0.285195	0.0295765	0.0335103	0.0190134	0.0063379	0.0253514	0.0401393	0.0063379	0.0335103	0.0084505	0.0084505	0.0042253	0.0335103	0.126754
0.0335103	0.0105631	0.0335103	0.0443645	0.0335103	0.0042253	0.0042253	0.0401393	0.0063379	0.0335103	0.0335103	0.0211261	0.0335103	0.230269	0.0084505	0.162668
0.0063379	0.0338017	0.111967	0.084503	0.0126757	0.0063379	0.0126757	0.0335103	0.0274639	0.0063379	0.0084505	0.0084505	0.0335103	0.0507022	0.0042253	0.169005
0.0335103	0.0335103	0.0485898	0.107741	0.0335103	0.0253514	0.0335103	0.0063379	0.0274639	0.0042253	0.0042253	0.0084505	0.0042253	0.0105631	0.0126757	0.441523
0.0866157	1.09218	0.200693	0.454197	0.0335103	0.0335103	0.0335103	0.0335103	0.0042253	0.0042253	0.0042253	0.0335103	0.0063379	0.266182	0.111967	0.0992913
0.0335103	0.0591524	0.0760529	0.0359142	0.0335103	0.0718279	0.0335103	0.361247	0.107741	0.0042253	0.0335103	0.0335103	0.0549274	0.0147883	0.0359142	0.0042253
0.0147883	0.0105631	0.137317	0.0697152	0.0335103	0.0063379	0.0042253	0.0042253	0.0042253	0.0063379	0.0042253	0.061265	0.0335103	0.0105631	0.0042253	0.528135
0.0335103	0.0295765	0.437297	0.139429	0.0335103	0.0335103	0.0335103	0.0084505	0.0335103	0.0464771	0.0042253	0.084503	0.0335103	0.0401393	0.0654902	0.0335103
0.0084505	0.0335103	0.0464771	0.285195	0.0335103	0.0063379	0.0335103	0.0042253	0.0253514	0.0105631	0.0335103	0.0335103	0.0335103	0.0335103	0.0232386	0.0335103
0.0335103	0.0084505	0.107741	1.01824	0.103516	0.293645	0.0042253	0.0335103	0.0401393	0.0335103	0.0335103	0.133092	0.0335103	0.0105631	0.162668	0.0042253
0.0335103	0.0335103	0.0335103	0.135205	0.0335103	0.0042253	0.0335103	0.0063379	0.0335103	0.0274639	0.0063379	0.0335103	0.0335103	0.363359	0.183793	0.0335103
0.109854	0.120417	0.0401393	0.061265	0.0063379	0.0335103	0.0042253	0.378147	0.0063379	0.0147883	0.0335103	0.0335103	0.0105631	0.43096	0.0084505	0.084503
0.0042253	0.0335103	0.090841	0.299982	0.0443645	0.0335103	0.0335103	0.0443645	0.0084505	0.0335103	0.0063379	0.0063379	0.0335103	0.278858	0.0063379	0.14788
0.0335103	0.0042253	0.0380269	0.462647	0.120417	0.0335103	0.0335103	0.084503	0.0169009	0.0528147	0.0335103	0.0335103	0.0335103	0.232381	0.0042253	0.0335103
0.0042253	0.0335103	0.0084505	0.238719	0.0105631	0.0335103	0.0335103	0.158443	0.0105631	0.0042253	0.0443645	0.103516	0.122529	0.0084505	0.0335103	0.0126757
0.0718279	0.0335103	0.0190134	0.0676026	0.109854	0.0042253	0.0335103	0.0335103	0.0126757	0.0335103	0.0591524	0.0190134	0.0802782	0.084503	0.0105631	0.0507022
0.0042253	0.0335103	0.196468	0.388709	0.0335103	0.0335103	0.0063379	0.122529	0.0042253	0.0335103	0.0335103	0.0992913	0.0147883	0.061265	0.0063379	0.0335103
0.0464771	0.0063379	0.0654902	0.302095	0.0359142	0.0042253	0.0084505	0.158443	0.175343	0.0335103	0.0359142	0.0042253	0.0147883	0.0335103	0.217594	0.0169009
0.0335103	0.0335103	0.0401393	0.0992913	0.0335103	0.135205	0.0335103	0.16478	0.0105631	0.143654	0.0190134	0.0042253	0.0253514	0.101404	0.0335103	0.261957
0.280969	0.245057	0.126754	0.0485898	0.0485898	0.0335103	0.0335103	0.031689	0.042252	0.0335103	0.0169009	0.0335103	0.0335103	0.122529	0.0335103	0.0335103
0.0335103	0.0335103	0.111967	0.179568	0.0105631	0.0335103	0.0084505	0.0169009	0.120417	0.0549274	0.0335103	0.0042253	0.0570397	0.350683	0.0042253	0.0232386
0.234494	0.0042253	0.443635	0.583067	0.0190134	0.0335103	0.0335103	0.0084505	0.0084505	0.0528147	0.0253514	0.0335103	0.0335103	0.0042253	0.0063379	0.0042253
0.0401393	0.0335103	0.158443	0.0591524	0.0063379	0.0335103	0.0042253	0.0105631	0.492223	0.0169009	0.0042253	0.0042253	0.0718279	0.166893	0.0549274	0.0718279
0.0063379	0.0335103	0.196468	0.0887282	0.0338017	0.0335103	0.0105631	0.0335103	0.0147883	0.0042253	0.0042253	0.236606	0.409835	0.257732	0.0549274	0.0190134
0.0147883	0.0147883	0.0549274	0.090841	0.126754	0.0084505	0.0335103	0.0042253	0.0169009	0.0063379	0.0084505	0.149993	0.0084505	0.0401393	0.215481	0.0335103
0.0042253	0.0335103	0.211256	0.141542	0.0335103	0.139429	0.0335103	0.0084505	0.0042253	0.0335103	0.0042253	0.0866157	0.0335103	0.0335103	0.0760529	0.0042253
0.0335103	0.0169009	0.0335103	0.0697152	0.0335103	0.0335103	0.0253514	0.0335103	0.0253514	0.0147883	0.190131	0.0464771	0.0042253	0.0443645	0.64433	0.109854
0.042252	0.0335103	0.031689	0.0335103	0.0063379	0.0084505	0.0042253	0.0335103	0.0274639	0.0335103	0.0063379	0.0042253	0.0335103	0.0084505	0.145767	0.0335103
0.0335103	0.0335103	0.513347	0.264069	0.0105631	0.274632	0.0335103	0.0042253	0.0274639	0.0338017	0.0063379	0.0335103	0.0335103	0.166893	0.0335103	0.0485898
0.0760529	0.0507022	0.124642	0.0802782	0.0084505	0.0335103	0.0335103	0.0063379	0.0335103	0.0335103	0.0335103	0.0190134	0.0042253	0.49011	0.437297	0.133092
0.0335103	0.0335103	0.0063379	0.175343	0.0335103	0.0802782	0.0084505	0.0335103	0.177455	0.0042253	0.0274639	0.0443645	0.0042253	0.0169009	0.204918	0.0211261
0.0126757	0.0507022	0.095066	0.0739403	0.219707	0.0335103	0.0063379	0.0084505	0.0190134	0.0335103	0.0042253	0.24717	0.0042253	0.16478	0.0335103	0.0443645
0.158443	0.0335103	0.0084505	0.0485898	0.114079	0.0335103	0.0335103	0.0335103	0.0335103	0.0042253	0.0126757	0.0042253	0.0335103	0.0042253	0.0335103	0.0042253
0.0190134	0.0380269	0.32322	0.283083	0.0335103	0.0335103	0.226044	0.17323	0.0335103	0.0335103	0.0126757	0.0063379	0.0335103	0.0084505	0.287308	0.0335103
0.0335103	0.0335103	0.185906	0.204918	0.278858	0.0063379	0.101404	0.0042253	0.031689	0.0335103	0.0169009	0.0042253	0.0126757	0.0105631	0.0335103	0.0295765
0.0887282	0.061265	0.0335103	0.479548	0.0570397	0.0335103	0.0335103	0.0335103	0.0190134	0.0335103	0.177455	0.0401393	0.0042253	0.0335103	0.0335103	0.0169009
0.0528147	0.0971787	0.299982	0.0485898	0.0126757	0.0335103	0.0042253	0.0042253	0.116192	0.0335103	0.0147883	0.0335103	0.0335103	0.0126757	0.0105631	0.137317
0.0063379	0.0335103	0.0042253	0.316883	0.0042253	0.0335103	0.160555	0.0335103	0.0084505	0.0063379	0.152105	0.0042253	0.0335103	0.0190134	0.0335103	0.0335103
0.0335103	0.0295765	0.384484	0.0866157	0.0042253	0.0929534	0.0760529	0.061265	0.629545	0.0697152	0.179568	0.0084505	0.0042253	0.0335103	0.0335103	0.0042253
0.0335103	0.0335103	0.095066	0.0549274	0.0335103	0.0335103	0.0190134	0.0126757	0.0335103	0.0211261	0.0042253	0.0063379	0.0335103	0.0042253	0.0335103	0.0105631
0.0042253	0.0335103	0.0042253	0.283083	0.0335103	0.0105631	0.0063379	0.0042253	0.0105631	0.0335103	0.0335103	0.0335103	0.0335103	0.0335103	0.0042253	0.0335103
0.0042253	0.0335103	0.061265	0.101404	0.0042253	0.16478	0.128867	0.0335103	0.190131	0.0335103	0.0335103	0.0147883	0.0335103	0.0335103	0.0338017	0.0063379
0.215481	0.278857	0.0335103	0.0676026	0.0126757	0.0042253	0.0335103	0.0126757	0.0335103	0.0042253	0.0042253	0.0335103	0.0335103	0.0335103	0.0802782	0.0335103
0.0105631	0.0335103	0.0063379	0.149993	0.0126757	0.0929534	0.0190134	0.0335103	0.0042253	0.0063379	0.0042253	0.0063379	0.0335103	0.0335103	0.0528147	0.0105631
0.0335103	0.0335103	0.266182	0.0335103	0.0335103	0.0147883	0.0335103	0.0042253	0.0084505	0.0063379	0.0335103	0.0335103	0.0335103	0.0147883	0.120417	0.0063379
0.0335103	0.0549274	0.143654	0.166893	0.0528147	0.0105631	0.0042253	0.0063379	0.0335103	0.0042253	0.109854	0.0335103	0.0105631	0.0335103	0.0335103	0.0126757
0.0335103	0.0253512	0.902044	0.439409	0.0335103	0.0147883	0.0335103	0.0335103	0.0169009	0.0042253	0.0507022	0.0042253	0.192244	0.0335103	0.0335103	0.0823906
0.0169009	0.0485894	0.0063379	0.207031	0.0335103	0.0105631	0.0335103	0.0335103	0.0335103	0.0063379	0.0084505	0.0335103	0.0335103	0.0042253	0.0042253	0.0105631
0.0335103	0.266182	0.399271	0.0971787	0.0335103	0.0126757	0.0084505	0.0042253	0.0335103	0.0169009	0.0335103	0.0084505	0.105629	0.0295765	0.0253514	0.0169009
0.0335103	0.0335103	0.359134	0.0929534	0.0042253	0.0063379	0.0274639	0.0063379	0.0105631	0.0335103	0.0042253	0.0335103	0.223931	0.0042253	0.0211261	0.0042253
0.0335103	0.116192	0.135205	0.418284	0.0335103	0.530255	0.0295765	0.0063379	0.0335103	0.0335103	0.0335103	0.0335103	0.0443645	0.0084505	0.0335103	0.0335103
0.0335103	0.0335103	0.162668	0.133092	0.209143	0.0063379	0.0929534	0.0335103	0.0654902	0.0063379	0.0063379	0.0042253	0.0528147	0.0105631	0.0335103	0.0335103
0.204918	0.0335103	0.107741	0.0380269	0.0042253	0.0042253	0.0697152	0.0042253	0.0335103	0.0335103	0.0084505	0.0654902	0.061265	0.0335103	0.0380269	0.0335103
0.0654902	0.0335103	0.312658	0.249282	0.0335103	0.0042253	0.0084505	0.0335103	0.0169009	0.0335103	0.0676026	0.0335103	0.0335103	0.0335103	0.0126757	0.0335103
0.0335103	0.0335103	0.0042253	0.141542	0.0335103	0.0042253	0.122529	0.0042253	0.0335103	0.0335103	0.0063379	0.169005	0.0042253	0.0063379	0.0042253	0.0507022
0.0042253	0.468985	0.109854	0.111967	0.0335103	0.0335103	0.090841	0.0335103	0.0866157	0.0335103	0.236606	0.139429	0.0335103	0.0335103	0.0335103	0.0570397
0.0335103	0.0335103	0.0063379	0.428847	0.0335103	0.0042253	0.0147883	0.0042253	0.0401393	0.0335103	0.15633	0.0084505	0.0335103	0.0042253	0.0335103	0.371808
0.0253514	0.0335103	0.0866157	0.0866157	0.0335103	0.0063379	0.0042253	0.0084505	0.0295765	0.0063379	0.177455	0.0042253	0.0042253	0.0042253	0.0335103	0.293645
0.49011	0.0042253	0.0063379	0.31477	0.614743	0.0335103	0.228156	0.0335103	0.0335103	0.0335103	0.0335103	0.0042253	0.0063379	0.0335103	0.0335103	0.105629
0.0335103	0.0105631	0.190131	0.188018	0.042252	0.0084505	0.0253514	0.0335103	0.0211261	0.0147883	0.0105631	0.0335103	0.0063379	0.0042253	0.278858	0.204918
0.0335103	0.0063379	1.02246	0.223931	0.0063379	0.0126757	0.0338017	0.0042253	0.0591524	0.0042253	0.122529	0.0335103	0.0335103	0.0105631	0.0528147	0.0126757
0.0335103	0.261957	0.190131	0.0760529	0.0335103	0.0335103	0.0042253	0.0335103	0.0190134	0.0335103	0.219707	0.0084505	0.24717	0.0042253	0.401384	0.257732
0.0335103	0.0335103	0.443635	0.0507022	0.042252	0.183793	0.14788	0.0335103	0.0126757	0.0335103	0.0335103	0.0042253	0.0190134	0.0274639	0.568276	0.0359142
0.0549274	0.122529	0.084503	0.15633	0.0042253	0.0335103	0.0232386	0.0063379	0.0929534	0.0042253	0.0211261	0.0335103	0.0105631	0.0295765	0.0591524	0.133092
0.437297	0.0084505	0.249282	0.14788	0.0335103	0.0084505	0.0063379	0.0335103	0.0633778	0.0335103	0.114079	0.0042253	0.031689	0.0042253	0.0971787	0.0042253
0.0063379	0.0549274	0.31477	0.107741	0.0042253	0.0105631	0.0929534	0.0190134	0.209143	0.0335103	0.0549274	0.0169009	0.0335103	0.0335103	0.0169009	0.103516
0.0335103	0.0335103	0.202806	0.312658	0.0105631	0.103516	0.105629	0.0633778	0.0591524	0.0042253	0.0802782	0.0335103	0.0169009	0.0042253	0.207031	0.061265
0.0335103	0.0147883	0.0335103	0.424622	0.14788	0.0084505	0.061265	0.0335103	0.141542	0.0042253	0.0042253	0.0335103	0.0335103	0.0335103	0.0084505	0.0063379
0.0335103	0.0335103	1.04358	0.449973	0.0335103	0.0232386	0.0063379	0.0190134	0.0084505	0.0335103	0.116192	0.0063379	0.0169009	0.0335103	0.0084505	0.0335103
0.0335103	0.0335103	0.0335103	0.264069	0.0335103	0.0401393	0.0335103	0.0063379	0.0042253	0.0335103	0.0063379	0.0335103	0.0042253	0.0335103	0.0105631	0.107741
0.0335103	0.0147883	0.0335103	0.042252	0.0335103	0.0042253	0.0169009	0.0084505	0.0633778	0.0760529	0.0084505	0.0295765	0.0105631	0.0063379	0.335896	0.0380269
0.0169009	0.0335103	0.139429	0.154217	0.0105631	0.0335103	0.0042253	0.0084505	0.342233	0.0697152	0.0335103	0.0063379	0.0211261	0.0126757	0.352795	0.223931
0.0335103	0.095066	0.965415	0.0971787	0.0042253	0.0335103	0.0169009	0.0042253	0.0084505	0.0126757	0.0042253	0.0084505	0.0335103	0.0335103	0.0105631	0.395046
0.0335103	0.0335103	0.0335103	0.0464771	0.0063379	0.0042253	0.0718279	0.0042253	0.095066	0.0335103	0.0105631	0.0335103	0.15633	0.0335103	0.17323	0.0063379
0.0042253	0.0591524	0.202806	0.287308	0.0802782	0.403497	0.0760529	0.0042253	0.293645	0.0105631	0.031689	0.0063379	0.0042253	0.0169009	0.0253514	0.335896
0.335896	0.371808	0.0042253	0.0359142	0.0335103	0.0591524	0.0335103	0.0042253	0.0549274	0.0335103	0.0335103	0.0335103	0.196468	0.0084505	0.126754	0.042252
0.0335103	0.0335103	0.0084505	0.485885	0.0335103	0.0570397	0.0335103	0.0464771	0.228156	0.0335103	0.120417	0.0359142	0.0042253	0.0335103	0.304207	0.175343
0.0335103	0.0147883	0.183793	0.0485898	0.0190134	0.0802782	0.0335103	0.0042253	0.061265	0.0063379	0.095066	0.0335103	0.0042253	0.042252	0.401384	0.741505
0.0126757	0.0042253	0.042252	0.031689	0.0042253	0.0335103	0.0274639	0.0169009	0.0147883	0.0063379	0.242945	0.0042253	0.0760529	0.0335103	0.409835	0.0528147
0.0335103	0.583067	0.538695	0.061265	0.0335103	0.0335103	0.0126757	0.0359142	0.0335103	0.0105631	0.0126757	0.0335103	0.0401393	0.0335103	0.25562	0.0866157
0.0335103	0.0802782	0.0380269	0.0042253	0.0335103	0.0335103	0.0335103	0.0335103	0.238719	0.0063379	0.0464771	0.0169009	0.183793	0.0042253	0.0232386	0.401384
0.0335103	0.0335103	0.0528147	0.741505	0.0335103	0.0274639	0.0232386	0.369696	0.0549274	0.145767	0.0760529	0.0232386	0.0335103	0.0063379	0.238719	0.253507
0.0335103	0.576728	0.0335103	0.152105	0.0507022	0.0126757	0.0042253	0.0190134	0.0084505	0.0042253	0.0042253	0.0042253	0.0335103	0.0335103	0.0042253	0.411946
0.0042253	0.107741	0.0335103	0.209143	0.0063379	0.0084505	0.0211261	0.0084505	0.0190134	0.0335103	0.0443645	0.0335103	0.0190134	0.0147883	0.042252	0.0274639
0.0335103	0.0380269	0.251394	0.154217	0.0084505	0.031689	0.0126757	0.0042253	0.0274639	0.0042253	0.105629	0.0335103	0.0570397	0.0335103	0.0528147	0.0335103
0.0485898	0.0063379	0.0042253	0.392934	0.0063379	0.0335103	0.0274639	0.0253514	0.0042253	0.0335103	0.0335103	0.0335103	0.0338017	0.0335103	0.285195	0.0063379
0.0335103	0.0084505	0.0401393	0.0443645	0.0190134	0.0401393	0.350683	0.0335103	0.0084505	0.0335103	0.0063379	0.0335103	0.0335103	0.0335103	0.194356	0.492223
0.031689	0.266182	0.359134	0.238719	0.0335103	0.0105631	0.158443	0.0335103	0.0126757	0.0335103	0.111967	0.0335103	0.0084505	0.0335103	0.0654902	0.0781655
0.0335103	0.0335103	0.665445	0.0760529	0.0335103	0.392934	0.242945	0.0335103	0.101404	0.0190134	0.0190134	0.0274639	0.0633778	0.0380269	0.0335103	0.042252
0.0335103	0.0335103	0.0335103	0.118304	0.0335103	0.0335103	0.0147883	0.0335103	0.0335103	0.0335103	0.268294	0.0676026	0.0147883	0.0335103	0.221819	0.338008
0.0485898	0.0335103	0.0084505	0.0401393	0.0042253	0.0335103	0.0232386	0.325333	0.16478	0.17323	0.0232386	0.0633778	0.0105631	0.0335103	0.118304	0.0042253
0.0335103	0.0253512	0.090841	0.158443	0.0335103	0.0335103	0.0335103	0.0335103	0.166893	0.0190134	0.0042253	0.0274639	0.0063379	0.0063379	0.137317	0.992881
0.0335103	0.0335103	0.0335103	0.200693	0.185906	0.0253514	0.0042253	0.0335103	0.109854	0.0335103	0.0335103	0.0042253	0.0335103	0.0335103	0.0654902	0.0042253
0.401384	0.0335103	0.0335103	0.194356	0.0335103	0.0042253	0.0929534	0.0126757	0.359134	0.031689	0.0042253	0.0380269	0.0169009	0.0042253	0.0063379	0.185906
0.0042253	0.0335103	0.0380269	0.158443	0.162668	0.0042253	0.0359142	0.0335103	0.0549274	0.302095	0.0335103	0.0042253	0.0084505	0.0169009	0.0063379	0.0338017
0.0335103	0.0335103	0.500673	0.0401393	0.0084505	0.109854	0.031689	0.0232386	0.111967	0.0739403	0.0401393	0.0084505	0.0042253	0.0063379	0.0042253	0.0147883
0.0042253	0.424622	0.0335103	0.464759	0.0042253	0.0335103	0.0084505	0.0147883	0.0802782	0.0084505	0.0063379	0.0335103	0.0190134	0.0335103	0.0211261	0.43096
0.0042253	0.0063379	0.0042253	0.0464771	0.0063379	0.0105631	0.0063379	0.0126757	0.194356	0.0042253	0.0169009	0.0335103	0.0335103	0.0042253	0.0063379	0.0063379
0.0570397	0.0335103	0.0042253	0.0676026	0.0105631	0.0042253	0.0335103	0.0105631	0.0063379	0.0335103	0.0084505	0.0335103	0.0169009	0.0042253	0.101404	0.0147883
0.0335103	0.0105631	0.0335103	0.0654902	0.0042253	0.0274639	0.0335103	0.0147883	0.0042253	0.061265	0.14788	0.0335103	0.0335103	0.0335103	0.0084505	0.105629
0.424622	0.386596	0.0335103	0.0887282	0.0063379	0.0042253	0.0485898	0.0335103	0.0335103	0.207031	0.0274639	0.0739403	0.0295765	0.0126757	0.0335103	0.69925
0.0335103	0.0335103	0.585179	0.0866157	0.0042253	0.0335103	0.166893	0.0335103	0.0147883	0.0042253	0.274632	0.0126757	0.0335103	0.0335103	0.0211261	0.0823906
0.0335103	0.0042253	0.0211261	0.124642	0.314771	0.342233	0.0443645	0.0335103	0.0063379	0.0335103	0.0147883	0.0335103	0.0084505	0.0335103	0.29787	0.0084505
0.162668	0.0335103	0.0401393	0.031689	0.0335103	0.0042253	0.0380269	0.0697152	0.0105631	0.0335103	0.0802782	0.0380269	0.0401393	0.0335103	0.0380269	0.357021
0.0042253	0.084503	0.135205	0.0887282	0.0042253	0.0335103	0.0335103	0.0335103	0.0570397	0.0042253	0.213369	0.0084505	0.042252	0.0335103	0.179568	0.0211261
0.0335103	0.0335103	0.0633778	0.236606	0.234494	0.0335103	0.0211261	0.0147883	0.114079	0.0335103	0.0335103	0.135205	0.342233	0.0042253	0.0063379	0.276745
0.0335103	0.0335103	0.0802782	0.0528147	0.0335103	0.0042253	0.0992913	0.0232386	0.0866157	0.0335103	0.0063379	0.0147883	0.0042253	0.0335103	0.15633	0.0084505
0.0335103	0.0335103	0.0063379	0.0633778	0.0335103	0.0335103	0.0335103	0.0802782	0.0190134	0.0335103	0.0335103	0.0335103	0.0169009	0.0335103	0.0485898	0.0063379
0.0274639	0.0338017	1.09639	0.0274639	0.304208	0.0042253	0.133092	0.0253514	0.118304	0.0335103	0.0823906	0.0335103	0.0971787	0.0042253	0.135205	0.654886
0.0335103	0.0335103	0.0401393	0.371808	0.238719	0.0335103	0.0335103	0.0169009	0.0042253	0.0042253	0.0042253	0.0335103	0.042252	0.0335103	0.0335103	0.202806
0.0169009	0.0335103	0.0335103	0.0295765	0.0147883	0.0042253	0.0042253	0.0335103	0.327445	0.0084505	0.0739403	0.0335103	0.0190134	0.0335103	0.0335103	0.226044
0.0335103	0.0335103	0.0042253	0.0126757	0.0169009	0.137317	0.0823906	0.0042253	0.0528147	0.0335103	0.0042253	0.0335103	0.0126757	0.0042253	0.0295765	0.589402
0.0042253	0.0335103	0.0063379	0.0591524	0.0211261	0.0335103	0.0063379	0.0335103	0.133092	0.0063379	0.0105631	0.0335103	0.27252	0.0084505	0.0335103	0.042252
0.0335103	0.0760529	0.0335103	0.357021	0.0633778	0.031689	0.0335103	0.0063379	0.0232386	0.0147883	0.118304	0.0335103	0.0887282	0.0335103	0.213369	0.0105631
0.105629	0.0335103	0.0126757	0.14788	0.0084505	0.0126757	0.0084505	0.0335103	0.0126757	0.0335103	0.0063379	0.0335103	0.154217	0.0335103	0.316883	0.0718279
0.0042253	0.0464771	0.111967	0.0781655	0.0105631	0.0084505	0.0147883	0.0126757	0.0169009	0.0335103	0.0042253	0.0335103	0.0335103	0.0042253	0.0063379	0.0335103
0.0042253	1.11964	0.0042253	0.196468	0.0253514	0.0335103	0.0295765	0.0084505	0.0063379	0.0335103	0.0169009	0.0507022	0.0042253	0.0042253	0.549265	0.0335103
0.0335103	0.0335103	0.327445	0.175343	0.0335103	0.0063379	0.0126757	0.0042253	0.251394	0.0126757	0.0063379	0.0335103	0.0253514	0.0063379	0.0335103	0.0335103
0.0760529	0.0042253	0.185906	0.145767	0.0126757	0.0063379	0.0147883	0.0335103	0.0063379	0.0335103	0.0335103	0.0042253	0.0335103	0.0335103	0.0335103	0.0335103
0.0147883	0.0147883	0.0063379	0.158443	0.0042253	0.0042253	0.0063379	0.0084505	0.409835	0.0335103	0.0335103	0.0042253	0.084503	0.0042253	0.0295765	0.0335103
0.0823906	0.0084505	0.0063379	0.0063379	0.0335103	0.0084505	0.0335103	0.0401393	0.171118	0.0042253	0.0760529	0.095066	0.0190134	0.0335103	0.0211261	0.0147883
0.0335103	0.0335103	0.175343	0.0335103	0.0335103	0.0126757	0.0380269	0.0335103	0.042252	0.0802782	0.0211261	0.253507	0.0359142	0.0105631	0.0042253	0.105629
0.0105631	0.0335103	0.253507	0.0042253	0.0335103	0.0335103	0.0211261	0.084503	0.116192	0.0042253	0.0042253	0.103516	0.0781655	0.0335103	0.0063379	0.0126757
0.0338017	0.0335103	0.354909	0.0063379	0.0042253	0.190131	0.0359142	0.0335103	0.0105631	0.0335103	0.0063379	0.0971787	0.0063379	0.0042253	0.0063379	0.0335103
0.107741	0.49011	0.0654902	0.0042253	0.0335103	0.0335103	0.0147883	0.0042253	0.13098	0.0042253	0.0042253	0.0126757	0.0507022	0.0126757	0.0401393	0.0042253
0.0190134	0.0760529	0.0335103	0.0338017	0.0335103	0.0042253	0.0105631	0.0063379	0.0042253	0.0105631	0.0335103	0.0335103	0.175343	0.0126757	0.0335103	0.0063379
0.0335103	0.395046	0.0335103	0.331671	0.0063379	0.0335103	0.0190134	0.274632	0.111967	0.0654902	0.0335103	0.0676026	0.118304	0.0335103	0.0190134	0.0929534
0.0335103	0.0335103	0.143654	0.0760529	0.291532	0.538695	0.0697152	0.0042253	0.0528147	0.0063379	0.0063379	0.0338017	0.361247	0.0042253	0.0042253	0.061265
0.0335103	0.200693	0.17323	0.532365	0.0042253	0.0042253	0.0042253	0.215481	0.606304	0.0042253	0.0335103	0.0042253	0.0335103	0.0335103	0.0084505	0.0528147
0.0335103	0.0042253	0.090841	0.0359142	0.0335103	0.0042253	0.0063379	0.0042253	0.042252	0.0335103	0.0335103	0.25562	0.090841	0.0335103	0.0084505	0.0335103
0.17323	0.0335103	0.462647	0.114079	0.0335103	0.0335103	0.0335103	0.0485898	0.0063379	0.0335103	0.0335103	0.0063379	0.133092	0.0063379	0.0042253	0.090841
0.0335103	0.0335103	0.0549274	0.0654902	0.0042253	0.0169009	0.0042253	0.0507022	0.0190134	0.0042253	0.0042253	0.0169009	0.0084505	0.0063379	0.0338017	0.441523
0.0335103	0.0335103	0.0971787	0.084503	0.0335103	0.0042253	0.0335103	0.0335103	0.0147883	0.0042253	0.0063379	0.0464771	0.0253514	0.0042253	0.0485898	0.0654902
0.0063379	0.0335103	0.0042253	0.249282	0.0335103	0.0335103	0.0485898	0.0335103	0.0274639	0.0105631	0.0335103	0.0676026	0.238719	0.0169009	0.0335103	0.0042253
0.0126757	0.257732	0.0335103	0.226044	0.0335103	0.0105631	0.0335103	0.0335103	0.0335103	0.0042253	0.0549274	0.0335103	0.0063379	0.0335103	0.0335103	0.0126757
0.101404	0.0335103	0.0253514	0.135205	0.0105631	0.0335103	0.0335103	0.0335103	0.0335103	0.0126757	0.0042253	0.0338017	0.0147883	0.0063379	0.354909	0.0105631
0.7246	0.0335103	0.0105631	0.0802782	0.0335103	0.0063379	0.0335103	0.0335103	0.0084505	0.0335103	0.0042253	0.0169009	0.0992913	0.141542	0.0823906	0.0443645
0.0485898	0.0335103	0.0335103	0.0335103	0.0063379	0.0335103	0.0335103	0.0042253	0.0654902	0.0335103	0.0335103	0.0042253	0.0253514	0.0063379	0.0760529	0.211256
0.0570397	0.0401393	0.0802782	0.166893	0.0211261	0.0335103	0.0084505	0.0042253	0.0063379	0.0335103	0.0042253	0.0042253	0.0335103	0.0084505	0.152105	0.859808
0.0211261	0.0335103	0.0126757	0.0401393	0.0295765	0.141542	0.0654902	0.0335103	0.321108	0.0335103	0.0253514	0.0335103	0.0335103	0.0042253	0.095066	0.0105631
0.0335103	0.0295765	0.276745	0.107741	0.0781655	0.0335103	0.0335103	0.0335103	0.0335103	0.0335103	0.0105631	0.0063379	0.0063379	0.120417	0.0335103	0.0063379
0.0335103	0.0335103	0.511236	0.361247	0.0335103	0.0126757	0.0335103	0.0042253	0.14788	0.0084505	0.031689	0.0464771	0.0739403	0.0335103	0.122529	0.502785
0.0335103	0.0126757	0.0739403	0.135205	0.0084505	0.0485898	0.0335103	0.0335103	0.0084505	0.0335103	0.188018	0.0335103	0.0335103	0.0781655	0.179568	0.24717
0.0335103	0.754175	0.0211261	0.321108	0.0063379	0.0335103	0.0335103	0.0084505	0.0335103	0.0335103	0.0063379	0.0063379	0.0084505	0.348571	0.0380269	0.120417
0.0335103	0.0335103	0.0042253	0.0105631	0.0335103	0.0042253	0.0335103	0.0063379	0.0147883	0.0335103	0.13098	0.061265	0.0105631	0.109854	0.318996	0.266182
0.0126757	0.0335103	0.0063379	0.348571	0.485885	0.16478	0.0335103	0.0084505	0.0335103	0.0042253	0.0274639	0.0335103	0.0335103	0.0335103	0.0126757	0.0380269
0.0335103	0.0335103	0.948532		0.0335103	0.0042253	0.0335103	0.0335103	0.0335103	0.0335103	0.0084505	0.0335103	0.0126757	0.0042253	0.145767	0.0335103
0.0335103	0.0042253	0.230269		0.0169009	0.0335103	0.0335103	0.0335103	0.0335103	0.0335103	0.0190134	0.0063379	0.0335103	0.0084505	0.0335103	0.0253514
0.0335103	0.0084505	0.0190134		0.509122	0.0253514	0.0042253	0.0042253	0.0359142	0.0335103	0.0274639	0.0042253	0.0335103	0.090841	0.116192	0.0335103
0.0380269	0.0485894	0.158443		0.0042253	0.090841	0.312658	0.0232386	0.0063379	0.0335103	0.416172	0.0063379	0.0042253	0.0338017	0.0105631	0.0335103
0.0232386	0.0335103	0.061265		0.0335103	0.171118	0.0169009	0.0335103	0.0335103	0.0063379	0.0063379	0.0042253	0.0126757	0.0401393	0.0335103	0.0929534
0.0335103	0.0232386	0.0042253		0.0126757	0.0190134	0.0781655	0.0042253	0.0335103	0.0084505	0.0335103	0.0042253	0.0335103	0.0335103	0.0063379	0.376034
0.0232386	0.0401393	0.0887282		0.0232386	0.0335103	0.0042253	0.0147883	0.0147883	0.0335103	0.0063379	0.0335103	0.0126757	0.0042253	0.0126757	0.185906
0.0335103	0.0335103	0.0464771		0.0063379	0.0063379	0.0335103	0.0042253	0.0084505	0.0335103	0.0335103	0.0063379	0.0335103	0.107741	0.0802782	0.0335103
0.0335103	0.0335103	0.823895		0.0335103	0.0335103	0.0063379	0.0147883	0.0063379	0.0781655	0.0335103	0.0211261	0.0335103	0.0232386	0.061265	0.0042253
0.0335103	0.0190134	0.0335103		0.327445	0.0084505	0.0084505	0.0126757	0.090841	0.107741	0.0147883	0.0042253	0.0335103	0.0335103	0.31477	0.0401393
0.0335103	0.0335103	0.299982		0.0042253	0.348571	0.0335103	0.0190134	0.0084505	0.15633	0.0169009	0.0338017	0.0676026	0.0190134	0.0335103	0.0507022
0.0335103	0.0380269	0.169005		0.0042253	0.0335103	0.0169009	0.0084505	0.0042253	0.0359142	0.0335103	0.0084505	0.0105631	0.0042253	0.0190134	0.0084505
0.0335103	0.0380269	0.0570397		0.0335103	0.0335103	0.0042253	0.0190134	0.0042253	0.0335103	0.095066	0.0335103	0.0335103	0.0335103	0.0042253	0.0335103
0.0549274	0.0147883	0.116192		0.0335103	0.0147883	0.0147883	0.0274639	0.0335103	0.0084505	0.0338017	0.0042253	0.0335103	0.0335103	0.321108	0.0042253
0.0042253	0.0335103	0.0126757		0.0042253	0.0335103	0.0335103	0.0084505	0.0335103	0.0211261	0.0042253	0.0063379	0.0654902	0.0335103	0.0866157	0.0335103
0.0335103	0.0063379	1.0626		0.0042253	0.0335103	0.0335103	0.084503	0.0042253	0.0105631	0.0570397	0.0042253	0.0335103	0.0335103	0.0335103	0.0063379
0.0335103	0.137317	0.500673		0.0335103	0.0335103	0.0042253	0.0335103	0.0335103	0.0084505	0.0063379	0.0335103	0.0063379	0.0084505	0.0507022	0.0335103
0.0042253	0.0507022	0.0338017		0.0063379	0.0335103	0.0126757	0.16478	0.0042253	0.0335103	0.0295765	0.0335103	0.0549274	0.122529	0.0338017	0.0169009
0.0464771	0.0335103	0.0866157		0.0335103	0.169005	0.0335103	0.0126757	0.0042253	0.0335103	0.0042253	0.0335103	0.0464771	0.0042253	0.333783	0.0718279
0.0335103	0.242944	0.80699		0.0084505	0.0335103	0.0335103	0.0335103	0.0042253	0.0042253	0.0335103	0.0335103	0.0063379	0.0335103	0.0169009	0.0335103
0.226044	0.0335103	0.397159		0.0335103	0.114079	0.0335103	0.0335103	0.0335103	0.0335103	0.0126757	0.0335103	0.0169009	0.15633	0.0084505	0.177455
0.0335103	0.0105631	0.711917		0.0335103	0.0335103	0.0335103	0.0063379	0.0335103	0.0042253	0.0042253	0.0126757	0.0335103	0.0697152	0.0971787	0.0063379
0.0335103	0.0335103	0.141542		0.0063379	0.0042253	0.0063379	0.0335103	0.122529	0.0335103	0.0063379	0.0295765	0.0335103	0.0335103	0.0359142	0.0718279
0.0335103	0.188018	0.0528147		0.0063379	0.204918	0.095066	0.0042253	0.591512	0.0042253	0.0084505	0.0335103	0.0042253	0.0335103	0.0335103	0.0338017
0.0295765	0.0654902	0.0359142		0.0063379	0.0042253	0.0042253	0.0335103	0.135205	0.0042253	0.0042253	0.0335103	0.0063379	0.118304	0.0042253	0.274632
0.0335103	0.0084505	0.111967		0.0063379	0.0084505	0.0335103	0.0335103	0.0295765	0.090841	0.0063379	0.0335103	0.0063379	0.0359142	0.0335103	0.492223
0.0549274	0.0042253	0.0633778		0.0147883	0.0042253	0.0335103	0.0335103	0.0443645	0.0063379	0.0335103	0.0335103	0.0084505	0.0335103	0.0335103	0.0295765
0.0335103	0.0105631	0.0464771		0.0335103	0.242945	0.0042253	0.0335103	0.0295765	0.145767	0.0147883	0.0042253	0.0190134	0.0295765	0.0335103	0.0126757
0.0042253	0.0335103	0.0676026		0.0042253	0.40561	0.0335103	0.0335103	0.0042253	0.0042253	0.0274639	0.0335103	0.0042253	0.0084505	0.061265	0.107741
0.162668	0.0464771	0.0126757		0.0335103	0.133092	0.0335103	0.0335103	0.0042253	0.0190134	0.0335103	0.0697152	0.0169009	0.0802782	0.0105631	0.0528147
0.0380269	0.0570397	0.0549274		0.0338017	0.0063379	0.0335103	0.0063379	0.0887282	0.0211261	0.0042253	0.0335103	0.0042253	0.0063379	0.0335103	0.0232386
0.0042253	0.0335103	0.0147883		0.0549274	0.0823906	0.0335103	0.143654	0.0042253	0.0063379	0.0105631	0.0929534	0.0335103	0.14788	0.0105631	0.0335103
0.0781655	0.0335103	0.0253514		0.0084505	0.0190134	0.0335103	0.0335103	0.0380269	0.0042253	0.0169009	0.0335103	0.0042253	0.0274639	0.0335103	0.0718279
0.338008	0.0380269	0.0274639		0.0335103	0.0042253	0.0335103	0.0063379	0.0042253	0.0042253	0.0335103	0.0464771	0.160555	0.0274639	0.0042253	0.0042253
0.0380269	0.0335103	0.0887282		0.177455	0.0042253	0.0335103	0.0335103	0.0105631	0.0042253	0.0063379	0.0718279	0.109854	0.0335103	0.105629	0.15633
0.0335103	0.0335103	0.0464771		0.0359142	0.0570397	0.0335103	0.0084505	0.0084505	0.0338017	0.0335103	0.0190134	0.061265	0.0335103	0.061265	0.0929534
0.0147883	0.0335103	0.0211261		0.0335103	0.0042253	0.0335103	0.0335103	0.0042253	0.0063379	0.0718279	0.0697152	0.0718279	0.0335103	0.188018	0.0126757
0.0335103	0.0697152	0.266182		0.0335103	0.0676026	0.0063379	0.0042253	0.0802782	0.0063379	0.0335103	0.0105631	0.0042253	0.0335103	0.103516	0.084503
0.236606	0.0042253	0.0443645		0.0335103	0.0042253	0.0335103	0.0654902	0.0232386	0.0335103	0.0042253	0.0063379	0.143654	0.0335103	0.0147883	0.0335103
0.105629	0.0591524	0.0549274		0.0042253	0.0190134	0.0335103	0.283083	0.0126757	0.0335103	0.0042253	0.0335103	0.0929534	0.0084505	0.285195	0.0335103
0.0335103	0.0190134	0.141542		0.0335103	0.251394	0.0335103	0.0084505	0.0063379	0.0335103	0.0063379	0.0335103	0.0528147	0.0335103	0.234494	0.0335103
0.0335103	0.0335103	0.0274639		0.0169009	0.0335103	0.0335103	0.0042253	0.0042253	0.0335103	0.0042253	0.0676026	0.219706	0.0042253	0.0169009	0.0335103
0.0042253	0.0253512	0.0042253		0.0528147	0.0126757	0.0042253	0.511236	0.0063379	0.179568	0.0335103	0.0929534	0.0359142	0.031689	0.0042253	0.101404
0.0335103	0.0335103	0.0232386		0.325333	0.0126757	0.0335103	0.0211261	0.0335103	0.0232386	0.0335103	0.0335103	0.0105631	0.0232386	0.253507	0.0190134
0.0335103	0.0335103	0.116192		0.14788	0.0105631	0.0335103	0.0739403	0.0253514	0.0169009	0.0335103	0.116192	0.40561	0.0676026	0.0105631	0.0335103
0.371808	0.0335103	0.111967		0.0335103	0.0335103	0.0335103	0.0929534	0.0335103	0.0042253	0.0063379	0.0042253	0.0380269	0.0042253	0.0105631	0.0929534
0.0042253	0.0335103	0.149993		0.0760529	0.0063379	0.0105631	0.0929534	0.0211261	0.0528147	0.0823906	0.0042253	0.0338017	0.0335103	0.346458	0.0063379
0.43096	0.0335103	0.310545		0.0042253	0.16478	0.0335103	0.0570397	0.41406	0.0485898	0.103516	0.0042253	0.0105631	0.0042253	0.0335103	0.0335103
0.0335103	0.551376	0.0190134		0.0063379	0.219706	0.0802782	0.0253514	0.0105631	0.0760529	0.0042253	0.0063379	0.0570397	0.177455	0.0335103	0.0042253
0.0335103	0.0335103	0.126754		0.0190134	0.0042253	0.0335103	0.0380269	0.0042253	0.0126757	0.0063379	0.183793	0.0063379	0.0190134	0.0042253	0.0063379
0.0335103	0.0042253	0.0335103		0.0190134	0.0335103	0.0335103	0.574603	0.0335103	0.0063379	0.042252	0.0084505	0.0042253	0.0335103	0.0084505	0.0335103
0.084503	0.0335103	0.200693		0.0063379	0.0232386	0.0042253	0.0169009	0.0042253	0.17323	0.0063379	0.0739403	0.306321	0.0335103	0.0042253	0.0063379
0.0676026	0.0335103	0.0335103		0.0042253	0.0126757	0.0335103	0.0335103	0.0169009	0.0335103	0.0335103	0.0335103	0.0335103	0.0335103	0.0063379	0.0335103
0.0335103	0.0335103	0.0591524		0.0042253	0.0676026	0.0335103	0.0464771	0.0105631	0.0335103	0.0380269	0.0335103	0.0063379	0.0190134	0.0335103	0.0335103
0.0335103	0.0335103	0.0718279		0.0335103	0.0335103	0.0335103	0.395046	0.0169009	0.0335103	0.0335103	0.0042253	0.0190134	0.128867	0.0042253	0.107741
0.0335103	0.0042253	0.0232386		0.0042253	0.261957	0.0335103	0.268294	0.0335103	0.0042253	0.0042253	0.0338017	0.0042253	0.0464771	0.114079	0.0253514
0.0335103	0.162668	0.152105		0.0335103	0.0063379	0.0042253	0.0105631	0.0335103	0.031689	0.0126757	0.0485898	0.0084505	0.0335103	0.0042253	0.084503
0.0335103	0.0335103	0.0760529		0.428847	0.0084505	0.0335103	0.0335103	0.0084505	0.0042253	0.0042253	0.0335103	0.0570397	0.0335103	0.0042253	0.0335103
0.0335103	0.0063379	0.0464771		0.0443645	0.0190134	0.0335103	0.0042253	0.0042253	0.0335103	0.0063379	0.0335103	0.0126757	0.0335103	0.0084505	0.0042253
0.139429	0.0335103	0.0802782		0.14788	0.0335103	0.0042253	0.0105631	0.0105631	0.0335103	0.0147883	0.0633778	0.0211261	0.0335103	0.0697152	0.0335103
0.0335103	0.0335103	0.0338017		0.0335103	0.103516	0.031689	0.0169009	0.0335103	0.0063379	0.0485898	0.179568	0.0042253	0.0335103	0.0335103	0.0335103
0.090841	0.0335103	0.519686		0.0105631	0.0335103	0.0335103	0.0042253	0.0335103	0.0126757	0.0042253	0.152105	0.0042253	0.0084505	0.0190134	0.0697152
0.0042253	0.487998	0.0443645		0.0084505	0.0063379	0.0335103	0.0042253	0.0042253	0.0042253	0.0335103	0.0042253	0.0274639	0.0211261	0.0105631	0.0335103
0.0335103	0.0335103	0.0253514		0.0042253	0.0063379	0.0335103	0.0063379	0.0335103	0.0335103	0.0338017	0.139429	0.0335103	0.0335103	0.276745	0.0063379
0.0042253	0.0335103	0.0042253		0.0147883	0.152105	0.0335103	0.0335103	0.0335103	0.0042253	0.0335103	0.0443645	0.0335103	0.0042253	0.0335103	0.0739403
0.0866157	0.0084505	0.162668		0.0042253	0.0042253	0.0190134	0.0739403	0.0335103	0.101404	0.0211261	0.118304	0.0654902	0.103516	0.090841	0.0190134
0.0126757	0.0335103	0.0823906		0.0063379	0.196468	0.0335103	0.135205	0.0042253	0.0084505	0.0335103	0.0971787	0.0335103	0.0169009	0.0042253	0.0335103
0.0042253	0.0464771	0.331671		0.0335103	0.0147883	0.0042253	0.0335103	0.0042253	0.0335103	0.0335103	0.0295765	0.0042253	0.0042253	0.0105631	0.0042253
0.0042253	0.0295765	0.177455		0.0042253	0.0335103	0.0335103	0.0335103	0.0335103	0.0105631	0.0335103	0.0335103	0.0042253	0.289421	0.0335103	0.0335103
0.0335103	0.0295765	0.261957		0.0335103	0.126754	0.0335103	0.0042253	0.0335103	0.0253514	0.0042253	0.0042253	0.0633778	0.0084505	0.207031	0.0042253
0.0887282	0.0335103	0.0823906		0.0335103	0.0335103	0.0335103	0.0084505	0.0063379	0.0335103	0.0063379	0.0042253	0.0232386	0.0335103	0.0063379	0.0042253
0.0084505	0.0359142	0.0887282		0.0335103	0.0042253	0.0335103	0.101404	0.0105631	0.0105631	0.0335103	0.0042253	0.0335103	0.0190134	0.0335103	0.0335103
0.0335103	0.0253512	0.0570397		0.0335103	0.0335103	0.0335103	0.0105631	0.0335103	0.0295765	0.0105631	0.0335103	0.0105631	0.0084505	0.15633	0.116192
0.0042253	0.0335103	0.0380269		0.0232386	0.103516	0.0335103	0.0335103	0.0042253	0.0084505	0.0063379	0.133092	0.0335103	0.0147883	0.0335103	0.0335103
0.280969	0.0232386	0.0253514		0.0335103	0.0084505	0.0335103	0.0253514	0.0335103	0.0274639	0.0335103	0.0633778	0.0169009	0.0274639	0.0084505	0.0335103
0.031689	0.0042253	0.0169009		0.0401393	0.0084505	0.0591524	0.0335103	0.0126757	0.0335103	0.0335103	0.0190134	0.264069	0.0126757	0.0126757	0.0338017
0.0359142	0.0084505	0.0147883		0.0042253	0.0335103	0.0063379	0.0084505	0.0335103	0.0169009	0.0335103	0.0866157	0.0866157	0.0042253	0.0335103	0.0084505
0.855573	0.0084505	0.17323		0.0063379	0.0105631	0.0335103	0.0105631	0.0084505	0.0335103	0.0063379	0.0335103	0.0042253	0.0335103	0.0802782	0.0105631
0.124642	0.0443645	0.0335103		0.27252	0.0335103	0.0335103	0.0335103	0.0338017	0.111967	0.0335103	0.0042253	0.0042253	0.0042253	0.0359142	0.0335103
0.219707	0.0338017	0.823895		0.190131	0.0335103	0.0335103	0.0126757	0.0380269	0.0335103	0.0335103	0.0042253	0.0084505	0.0295765	0.0190134	0.0335103
0.0992913	0.0232386	0.0211261		0.0335103	0.120417	0.0335103	0.0105631	0.0190134	0.0274639	0.0084505	0.0232386	0.0335103	0.0549274	0.0335103	0.0042253
0.0485898	0.0335103	0.111967		0.0335103	0.0335103	0.0063379	0.0042253	0.0335103	0.0335103	0.0042253	0.0485898	0.0042253	0.120417	0.0335103	0.0335103
0.0335103	0.0335103	0.278858		0.0042253	0.0335103	0.0335103	0.0335103	0.0042253	0.0528147	0.0042253	0.0823906	0.0335103	0.0992913	0.0042253	0.0084505
0.0380269	0.0232386	0.031689		0.0042253	0.0335103	0.0335103	0.0169009	0.0147883	0.0591524	0.0084505	0.0676026	0.0335103	0.0338017	0.0739403	0.401384
0.152105	0.0335103	0.198581		0.0335103	0.084503	0.0335103	0.0335103	0.0335103	0.0084505	0.0338017	0.0084505	0.0335103	0.114079	0.0063379	0.0335103
0.204918	0.0335103	0.139429		0.0335103	0.0335103	0.0335103	0.0084505	0.0335103	0.0335103	0.042252	0.109854	0.0335103	0.0654902	0.0147883	0.0335103
0.0335103	0.0042253	0.0253514		0.0042253	0.0042253	0.0105631	0.0042253	0.0063379	0.0335103	0.0126757	0.120417	0.0335103	0.0042253	0.149993	0.0485898
0.031689	0.0464771	0.0084505		0.0485898	0.0063379	0.0335103	0.0042253	0.0335103	0.0084505	0.0401393	0.202806	0.0335103	0.0335103	0.0169009	0.0253514
0.0464771	0.0335103	0.0335103		0.0335103	0.0335103	0.0063379	0.0335103	0.0335103	0.0335103	0.0380269	0.031689	0.0335103	0.0042253	0.0105631	0.0335103
0.0335103	0.0335103	0.49011		0.0335103	0.0335103	0.0335103	0.0042253	0.0190134	0.0335103	0.0335103	0.0169009	0.0169009	0.031689	0.0335103	0.0335103
0.215481	0.130979	0.0335103		0.0335103	0.492223	0.111967	0.0042253	0.0570397	0.0335103	0.0335103	0.0084505	0.0335103	0.188018	0.0084505	0.0335103
0.0528147	0.0335103	0.331671		0.0335103	0.0335103	0.095066	0.0443645	0.0335103	0.0253514	0.0211261	0.0528147	0.0042253	0.109854	0.0211261	0.0063379
0.0169009	0.0147883	0.0084505		0.240832	0.0063379	0.0042253	0.0042253	0.0335103	0.0232386	0.0380269	0.0063379	0.0105631	0.0211261	0.0042253	0.0335103
0.0528147	0.0335103	0.221819		0.0063379	0.0063379	0.0335103	0.0042253	0.0042253	0.0042253	0.219707	0.0063379	0.0211261	0.105629	0.0126757	0.0335103
0.0887282	0.0169009	0.0866157		0.0063379	0.090841	0.0042253	0.0335103	0.0335103	0.0335103	0.0147883	0.0063379	0.0063379	0.0063379	0.0063379	0.0042253
0.566155	0.0570397	0.346458		0.0335103	0.0190134	0.0335103	0.0126757	0.0105631	0.0084505	0.0549274	0.0335103	0.0063379	0.0063379	0.0464771	0.0126757
0.0335103	0.0335103	0.0591524		0.0335103	0.0063379	0.0042253	0.114079	0.0335103	0.0063379	0.103516	0.0042253	0.0084505	0.141542	0.0335103	0.0335103
0.0335103	0.137317	1.20202		0.200693	0.0335103	0.0084505	0.0335103	0.0443645	0.0084505	0.0359142	0.0063379	0.0042253	0.0781655	0.0063379	0.0211261
0.0335103	0.0147883	0.137317		0.0063379	0.352795	0.0335103	0.0042253	0.0335103	0.0042253	0.179568	0.0042253	0.25562	0.0042253	0.0042253	0.0485898
0.0335103	0.145767	0.17323		0.606304	0.0335103	0.0335103	0.0380269	0.0335103	0.0063379	0.0335103	0.0169009	0.0335103	0.0105631	0.0335103	0.0126757
0.169005	0.0253512	0.090841		0.103516	0.0042253	0.0335103	0.0380269	0.0335103	0.0063379	0.0084505	0.0063379	0.0084505	0.0335103	0.0335103	0.0042253
0.0335103	0.0335103	0.0507022		0.0335103	0.0335103	0.0063379	0.0063379	0.0335103	0.162668	0.0274639	0.0335103	0.0063379	0.0295765	0.0335103	0.0105631
0.0335103	0.0335103	0.0105631		0.0335103	0.0335103	0.0042253	0.0084505	0.0335103	0.0063379	0.0274639	0.031689	0.0335103	0.0084505	0.0335103	0.0169009
0.0335103	0.0528147	0.0042253		0.0042253	0.0105631	0.0335103	0.0147883	0.042252	0.0042253	0.0084505	0.0739403	0.0063379	0.0211261	0.0335103	0.0335103
0.350683	0.0528147	0.240832		0.0335103	0.0105631	0.031689	0.0335103	0.0335103	0.0335103	0.0335103	0.344345	0.0084505	0.0042253	0.0042253	0.095066
0.141542	0.0335103	0.0042253		0.0147883	0.0042253	0.0335103	0.0063379	0.13098	0.0335103	0.0042253	0.0042253	0.0084505	0.0335103	0.0084505	0.0042253
0.0335103	0.0335103	0.0335103		0.0147883	0.31477	0.0335103	0.0084505	0.0335103	0.0335103	0.0063379	0.215481	0.0253514	0.0042253	0.0063379	0.0697152
0.0335103	0.0338017	0.0042253		0.0063379	0.0105631	0.031689	0.0063379	0.0042253	0.0335103	0.0335103	0.0335103	0.0335103	0.0042253	0.0147883	0.0105631
0.0739403	0.0335103	0.105629		0.0335103	0.0042253	0.0335103	0.0591524	0.0042253	0.15633	0.0042253	0.0570397	0.0105631	0.0147883	0.0042253	0.0507022
0.179568	0.135205	0.0760529		0.0335103	0.0253514	0.0042253	0.0084505	0.0335103	0.0781655	0.0335103	0.0335103	0.0063379	0.0063379	0.0335103	0.0084505
0.0335103	0.031689	0.0042253		0.0084505	0.137317	0.0335103	0.0042253	0.0335103	0.0335103	0.0380269	0.0335103	0.0274639	0.0335103	0.0335103	0.0335103
0.0335103	0.0335103	0.0485898		0.0335103	0.0335103	0.0335103	0.0335103	0.0042253	0.0992913	0.0335103	0.0274639	0.0042253	0.0335103	0.0042253	0.0253514
0.0232386	0.0335103	0.061265		0.228156	0.0190134	0.0335103	0.0335103	0.0042253	0.17323	0.0126757	0.031689	0.0295765	0.0105631	0.0335103	0.0063379
0.0335103	0.0335103	0.0042253		0.0335103	0.0042253	0.0739403	0.0063379	0.0063379	0.0295765	0.0335103	0.0084505	0.0169009	0.0042253	0.0335103	0.0084505
0.0335103	0.213368	0.0823906		0.0335103	0.0443645	0.0063379	0.0042253	0.0335103	0.0464771	0.0042253	0.0147883	0.0042253	0.0105631	0.0335103	0.0335103
0.257732	0.0335103	0.331671		0.0335103	0.0084505	0.0335103	0.0507022	0.149993	0.103516	0.0105631	0.0401393	0.0190134	0.0335103	0.0335103	0.0335103
0.0335103	0.0335103	0.0718279		0.0335103	0.781628	0.0335103	0.0042253	0.0335103	0.0335103	0.0105631	0.0042253	0.0169009	0.031689	0.0147883	0.0042253
0.0335103	0.0443645	0.0549274		0.0335103	0.0335103	0.0042253	0.0105631	0.0232386	0.0335103	0.0063379	0.0335103	0.0105631	0.0042253	0.137317	0.031689
0.0335103	0.0042253	0.0042253		0.0042253	0.0063379	0.0335103	0.0084505	0.0335103	0.111967	0.0042253	0.0063379	0.0063379	0.0042253	0.0063379	0.0335103
0.0335103	0.0042253	0.0718279		0.0084505	0.0335103	0.0042253	0.0042253	0.0042253	0.0335103	0.0335103	0.0084505	0.0335103	0.154217	0.0335103	0.0147883
0.031689	0.94641	0.0211261		0.0042253	0.0042253	0.0295765	0.0335103	0.0335103	0.0190134	0.0335103	0.0676026	0.0042253	0.0126757	0.0084505	0.0063379
0.0335103	0.0335103	0.0335103		0.0335103	0.0042253	0.14788	0.0992913	0.0126757	0.0084505	0.0335103	0.0042253	0.0042253	0.0380269	0.0211261	0.0084505
0.0335103	0.0063379	0.143654		0.0063379	0.0126757	0.0335103	0.0335103	0.0335103	0.245057	0.0084505	0.0105631	0.0042253	0.0084505	0.302095	0.0335103
0.0335103	0.0335103	0.0464771		0.0549274	0.0335103	0.0335103	0.0042253	0.0335103	0.291532	0.0042253	0.0105631	0.0335103	0.0335103	0.0359142	0.042252
0.0380269	0.0063379	0.122529		0.0042253	0.190131	0.0335103	0.0335103	0.0335103	0.380258	0.0335103	0.0335103	0.0335103	0.0042253	0.101404	0.0274639
0.0335103	0.143654	0.126754		0.0335103	0.0274639	0.0169009	0.0335103	0.0042253	0.0335103	0.0335103	0.0042253	0.0335103	0.0063379	0.0084505	0.0274639
0.0335103	0.0063379	0.0042253		0.0042253	0.0335103	0.0335103	0.0335103	0.0335103	0.0335103	0.0335103	0.0335103	0.0335103	0.0253514	0.0335103	0.105629
0.0335103	0.0084505	0.0739403		0.0335103	0.0929534	0.0335103	0.0126757	0.0169009	0.042252	0.0084505	0.031689	0.0335103	0.0335103	0.0105631	0.133092
0.0335103	1.13444	0.200693		0.0335103	0.0169009	0.0042253	0.0042253	0.0335103	0.0126757	0.0335103	0.0335103	0.0335103	0.0042253	0.0866157	0.0335103
0.221819	0.118304	0.0633778		0.0335103	0.669674	0.0971787	0.0335103	0.0042253	0.0105631	0.0063379	0.105629	0.0042253	0.335896	0.0147883	0.0105631
0.0335103	0.0295765	0.15633		0.0335103	0.084503	0.0335103	0.0232386	0.0211261	0.0169009	0.0335103	0.0338017	0.143654	0.0335103	0.0063379	0.0084505
0.0084505	0.0084505	0.0084505		0.0042253	0.0335103	0.0335103	0.0335103	0.0063379	0.0335103	0.0335103	0.253507	0.0335103	0.0042253	0.0464771	0.111967
0.0335103	0.0335103	0.105629		0.0105631	0.0105631	0.0232386	0.0190134	0.0335103	0.0335103	0.0335103	0.0084505	0.0507022	0.0335103	0.0887282	0.0063379
0.0335103	0.0335103	0.13098		0.0335103	0.0274639	0.0335103	0.0084505	0.0169009	0.0274639	0.0169009	0.0335103	0.120417	0.0063379	0.0335103	0.124642
0.0042253	0.031689	0.118304		0.0042253	0.0042253	0.0042253	0.458422	0.0335103	0.0084505	0.0042253	0.0335103	0.0042253	0.0232386	0.0335103	0.0338017
0.0335103	0.283083	0.0147883		0.0335103	0.261957	0.0042253	0.0335103	0.0335103	0.0063379	0.0335103	0.0335103	0.0697152	0.0147883	0.0335103	0.0274639
0.0042253	0.0335103	0.0335103		0.0335103	0.0295765	0.0126757	0.0084505	0.0335103	0.0335103	0.0063379	0.031689	0.0335103	0.0105631	0.0147883	0.0335103
0.0335103	0.0335103	0.0274639		0.0063379	0.0063379	0.0335103	0.0042253	0.0335103	0.0335103	0.0042253	0.0063379	0.0169009	0.0570397	0.219706	0.042252
0.0335103	0.0335103	0.441523		0.0042253	0.0084505	0.0335103	0.27252	0.0063379	0.0335103	0.0126757	0.0063379	0.0335103	0.0063379	0.0190134	0.0084505
0.0211261	0.0232386	0.0274639		0.122529	0.0633778	0.0190134	0.0335103	0.0126757	0.0084505	0.0335103	0.0084505	0.0335103	0.0169009	0.0190134	0.0126757
0.0335103	0.0335103	0.0335103		0.0084505	0.0042253	0.0063379	0.0084505	0.0042253	0.0335103	0.0591524	0.0335103	0.0211261	0.0929534	0.608419	0.0335103
0.0335103	0.60207	0.111967		0.0105631	0.0126757	0.0335103	0.458422	0.0042253	0.49011	0.0335103	0.0042253	0.0823906	0.0802782	0.0042253	0.0464771
0.0591524	0.0335103	0.109854		0.0335103	0.128867	0.0211261	0.0335103	0.0335103	0.0507022	0.0335103	0.14788	0.0190134	0.0676026	0.0335103	0.0169009
0.0591524	0.0335103	0.232381		0.0335103	0.0335103	0.0126757	0.0084505	0.0042253	0.0335103	0.0042253	0.0335103	0.0042253	0.283083	0.0063379	0.141542
0.0335103	0.122529	0.299982		0.0335103	0.242945	0.0335103	0.228156	0.0335103	0.175343	0.0335103	0.0190134	0.0211261	0.0335103	0.0126757	0.0335103
0.0084505	0.329558	0.0042253		0.0042253	0.0126757	0.0105631	0.0084505	0.0335103	0.0295765	0.0335103	0.0335103	0.061265	0.41406	0.0042253	0.0335103
0.0063379	0.0443645	0.211256		0.0335103	0.200693	0.0063379	0.238719	0.0335103	0.0084505	0.0335103	0.0335103	0.0335103	0.0084505	0.0084505	0.0335103
0.0335103	0.0147883	0.116192		0.0063379	0.0335103	0.0335103	0.0507022	0.0232386	0.0253514	0.0042253	0.0063379	0.0335103	0.090841	0.0042253	0.0676026
0.589402	0.517572	0.373922		0.0335103	0.0335103	0.0335103	0.0335103	0.0042253	0.0105631	0.0042253	0.0042253	0.0335103	0.0190134	0.0042253	0.0126757
0.0295765	0.031689	0.111967		0.0042253	0.0335103	0.0335103	0.0232386	0.0105631	0.0084505	0.0335103	0.0042253	0.0335103	0.122529	0.0335103	0.0042253
0.0718279	0.0335103	0.0335103		0.0042253	0.0335103	0.0507022	0.0084505	0.0335103	0.0042253	0.0105631	0.0105631	0.0042253	0.0042253	0.0335103	0.0211261
0.0063379	0.0335103	0.175343		0.0042253	0.107741	0.202806	0.0335103	0.0335103	0.0211261	0.0335103	0.0042253	0.0042253	0.0147883	0.0042253	0.251394
0.0335103	0.0232386	0.0147883		0.114079	0.0718279	0.0335103	0.0866157	0.223931	0.0697152	0.0063379	0.0126757	0.0042253	0.0105631	0.0335103	0.0126757
0.0335103	0.0335103	0.0443645		0.0063379	0.492223	0.0084505	0.169005	0.0335103	0.0042253	0.107741	0.0126757	0.0042253	0.0274639	0.259844	0.0802782
0.0063379	0.0190134	0.042252		0.0338017	0.0042253	0.0335103	0.0335103	0.0335103	0.0274639	0.0295765	0.0190134	0.0335103	0.0042253	0.0105631	0.0335103
0.0335103	0.0866157	0.0528147		0.0335103	0.0042253	0.0042253	0.0042253	0.0335103	0.0042253	0.0063379	0.0063379	0.0042253	0.0335103	0.0063379	0.0105631
0.0335103	0.0718279	0.0253514		0.084503	0.0443645	0.0042253	0.0211261	0.0335103	0.031689	0.0338017	0.0211261	0.0335103	0.0063379	0.0169009	0.162668
0.0335103	0.0190134	0.0929534		0.0335103	0.0042253	0.0063379	0.0190134	0.0335103	0.388709	0.0253514	0.0401393	0.0190134	0.0063379	0.042252	0.226044
0.0335103	0.0507022	0.859808		0.0335103	0.276745	0.0274639	0.0335103	0.0359142	0.0147883	0.0335103	0.0063379	0.0335103	0.16478	0.0126757	0.0802782
0.124642	0.0335103	0.228156		0.0105631	0.0401393	0.0253514	0.0211261	0.0042253	0.126754	0.0063379	0.14788	0.0335103	0.0253514	0.0126757	0.0169009
0.0126757	0.0335103	0.547143		0.0335103	0.0126757	0.0211261	0.158443	0.0335103	0.090841	0.031689	0.0232386	0.0335103	0.18168	0.0335103	0.0335103
0.0335103	0.0335103	0.120417		0.0335103	0.32322	0.0042253	0.0887282	0.0335103	0.0570397	0.0335103	0.0760529	0.0335103	0.0105631	0.0549274	0.0042253
0.0295765	0.0654902	0.0697152		0.0335103	0.0335103	0.0335103	0.0335103	0.0992913	0.0126757	0.259844	0.0063379	0.0335103	0.061265	0.0042253	0.388709
0.228156	0.0335103	0.0042253		0.0335103	0.0211261	0.0042253	0.0335103	0.0485898	0.0335103	0.0359142	0.0633778	0.0335103	0.0063379	0.0042253	0.0147883
0.0042253	0.031689	0.0992913		0.0042253	0.0147883	0.0335103	0.0042253	0.0739403	0.0335103	0.114079	0.204918	0.0335103	0.177455	0.0335103	0.418284
0.0335103	0.031689	0.109854		0.0063379	0.0335103	0.0042253	0.0802782	0.15633	0.0335103	0.0063379	0.0105631	0.0866157	0.0274639	0.0335103	0.0042253
0.0105631	0.31477	0.128867		0.0335103	0.0528147	0.0335103	0.0105631	0.0042253	0.0211261	0.0335103	0.0335103	0.0063379	0.392934	0.0105631	0.0126757
0.312658	0.0335103	0.0042253		0.042252	0.0190134	0.0126757	0.0105631	0.171118	0.118304	0.0335103	0.0105631	0.0335103	0.0211261	0.120417	0.0401393
0.0042253	0.0335103	0.031689		0.0042253	0.0063379	0.0335103	0.0190134	0.0084505	0.0274639	0.0335103	0.0335103	0.0335103	0.0147883	0.0335103	0.0126757
0.0084505	0.0485894	0.0335103		0.0335103	0.0147883	0.0335103	0.0084505	0.031689	0.0063379	0.0042253	0.0147883	0.0105631	0.0335103	0.0335103	0.194356
0.0335103	0.0338017	0.179568		0.0335103	0.0335103	0.0335103	0.0335103	0.0802782	0.0063379	0.0084505	0.0335103	0.0335103	0.0335103	0.0335103	0.0335103
0.0335103	0.773185	0.462647		0.0042253	0.0335103	0.0335103	0.0335103	0.0147883	0.0105631	0.0042253	0.0335103	0.0063379	0.0570397	0.0335103	0.0464771
0.0042253	0.0380269	0.209143		0.0335103	0.0335103	0.0335103	0.0105631	0.234494	0.0335103	0.0042253	0.0335103	0.0084505	0.107741	0.0042253	0.0253514
0.49856	0.0335103	0.095066		0.0042253	0.202806	0.0335103	0.0335103	0.13098	0.0169009	0.109854	0.0335103	0.0335103	0.166893	0.0335103	0.0211261
0.154217	0.0335103	0.0676026		0.238719	0.0335103	0.0042253	0.0335103	0.177455	0.0274639	0.0335103	0.0335103	0.0042253	0.0335103	0.0063379	0.139429
0.0335103	0.0042253	0.090841		0.0335103	0.0042253	0.0335103	0.0042253	0.0443645	0.228156	0.0359142	0.228156	0.0335103	0.266182	0.0335103	0.116192
0.0063379	0.673903	0.0507022		0.116192	0.061265	0.0042253	0.0042253	0.0802782	0.0084505	0.0063379	0.0084505	0.0335103	0.302095	0.166893	0.259844
0.0335103	0.0335103	0.031689		0.0335103	0.0063379	0.0335103	0.0084505	0.0105631	0.111967	0.0147883	0.0335103	0.456309	0.223931	0.0063379	0.0042253
0.0676026	0.061265	0.0570397		0.0232386	0.183793	0.0335103	0.433073	0.0147883	0.0042253	0.160555	0.0781655	0.107741	0.0084505	0.223931	0.0335103
0.0105631	0.0335103	0.0760529		0.0042253	0.0105631	0.0335103	0.179568	0.0105631	0.0335103	0.0274639	0.0338017	0.0042253	0.0042253	0.169005	0.245057
0.16478	0.0549274	0.0084505		0.0335103	0.0105631	0.0335103	0.0676026	0.0211261	0.0528147	0.0084505	0.0335103	0.0042253	0.0654902	0.0335103	0.0042253
0.0335103	0.0190134	0.0401393		0.171118	0.0126757	0.0335103	0.0042253	0.0042253	0.124642	0.0084505	0.378147	0.0042253	0.0338017	0.0274639	0.0042253
0.0335103	0.0335103	0.0633778		0.0335103	0.0335103	0.0335103	0.0042253	0.0929534	0.0042253	0.0295765	0.207031	0.0335103	0.0063379	0.166893	0.0042253
0.0335103	0.0335103	0.126754		0.0335103	0.0380269	0.0335103	0.240832	0.042252	0.0042253	0.0335103	0.0042253	0.0335103	0.0063379	0.090841	0.0335103
0.0335103	0.0169009	0.0591524		0.0335103	0.0084505	0.0335103	0.352795	0.0295765	0.0549274	0.0042253	0.0147883	0.0335103	0.0105631	0.031689	0.0335103
0.226044	1.34144	0.0676026		0.0042253	0.0887282	0.0335103	0.0190134	0.0335103	0.0253514	0.270407	0.0126757	0.0335103	0.0147883	0.0274639	0.0359142
0.0335103	0.0335103	0.228156		0.0335103	0.0084505	0.0335103	0.606304	0.0335103	0.0335103	0.0633778	0.0485898	0.0335103	0.0126757	0.0335103	0.0335103
0.0211261	0.0335103	0.0335103		0.0335103	0.107741	0.0063379	0.042252	0.0042253	0.0295765	0.0063379	0.215481	0.0335103	0.0042253	0.0335103	0.0126757
0.0335103	0.0335103	0.299982		0.0042253	0.0084505	0.0042253	0.0359142	0.0063379	0.0335103	0.0084505	0.0042253	0.0335103	0.0169009	0.0335103	0.0443645
0.0485898	0.0335103	0.0485898		0.0335103	0.51546	0.0042253	0.232381	0.135205	0.0570397	0.0335103	0.0335103	0.0335103	0.0105631	0.0084505	0.0063379
0.0335103	0.0105631	0.226044		0.0042253	0.0335103	0.0335103	0.190131	0.0335103	0.0105631	0.0335103	0.0335103	0.0335103	0.0126757	0.0274639	0.287308
0.0464771	0.0335103	0.0335103		0.0335103	0.0147883	0.0823906	0.0274639	0.0063379	0.0147883	0.0335103	0.200693	0.0335103	0.266182	0.0335103	0.0335103
0.0335103	0.0190134	0.299982		0.137317	0.0697152	0.0335103	0.0169009	0.0042253	0.0042253	0.0335103	0.0126757	0.0042253	0.15633	0.0232386	0.0253514
0.0042253	0.0295765	0.0464771		0.0335103	0.0190134	0.0063379	0.0105631	0.101404	0.0335103	0.0253514	0.0739403	0.0084505	0.160555	0.0739403	0.0042253
0.084503	0.122529	0.557709		0.0676026	0.0464771	0.0335103	0.207031	0.0335103	0.0105631	0.0335103	0.0042253	0.0042253	0.0739403	0.0335103	0.0335103
0.0335103	0.0591524	0.141542		0.0335103	0.0335103	0.0335103	0.0190134	0.149993	0.0528147	0.0335103	0.061265	0.0335103	0.0211261	0.0084505	0.0335103
0.143654	0.0549274	0.0042253		0.0042253	0.0042253	0.0335103	0.0042253	0.0335103	0.109854	0.0042253	0.0169009	0.0335103	0.0295765	0.0063379	0.0485898
0.0335103	0.0335103	0.137317		0.0335103	0.0063379	0.0126757	0.0335103	0.0042253	0.0335103	0.0335103	0.0063379	0.0335103	0.0063379	0.0335103	0.0335103
0.287308	0.0335103	0.0335103		0.0335103	0.0335103	0.0335103	0.0507022	0.0063379	0.162668	0.0084505	0.0042253	0.0335103	0.141542	0.0335103	0.0042253
0.0232386	0.215481	0.118304		0.0335103	0.137317	0.0335103	0.0335103	0.0042253	0.0063379	0.0042253	0.0042253	0.0042253	0.0274639	0.0335103	0.0464771
0.0063379	0.0105631	0.0335103		0.0335103	0.0335103	0.0335103	0.0063379	0.0335103	0.0335103	0.0042253	0.0335103	0.0335103	0.0253514	0.0042253	0.0042253
0.0084505	1.26328	0.361247		0.268294	0.0823906	0.0335103	0.0169009	0.0042253	0.160555	0.0232386	0.0126757	0.0335103	0.145767	0.0335103	0.0126757
0.0335103	0.0335103	0.0063379		0.0335103	0.0063379	0.0335103	0.40561	0.0042253	0.0105631	0.0401393	0.0211261	0.0335103	0.0335103	0.0335103	0.0274639
0.0169009	0.0335103	0.0549274		0.0335103	0.0042253	0.0335103	0.211256	0.0335103	0.0126757	0.107741	0.0380269	0.0335103	0.606304	0.380258	0.0335103
0.118304	0.0274639	0.0335103		0.0335103	0.0654902	0.0335103	0.0335103	0.0335103	0.0335103	0.0105631	0.0042253	0.0105631	0.0718279	0.0063379	0.0335103
0.105629	0.109854	0.302095		0.0335103	0.0253514	0.0359142	0.135205	0.0105631	0.0676026	0.031689	0.0211261	0.0063379	0.992881	0.0126757	0.27252
0.0335103	0.0335103	0.152105		0.0335103	0.0335103	0.0335103	0.0443645	0.0211261	0.0335103	0.0335103	0.18168	0.0147883	0.0528147	0.280969	0.215481
0.0253514	0.0042253	0.090841		0.0335103	0.0338017	0.0335103	0.0676026	0.0063379	0.120417	0.0335103	0.188018	0.0338017	0.0253514	0.105629	0.0338017
0.0335103	0.0084505	0.0084505		0.0063379	0.0335103	0.0335103	0.228156	0.0335103	0.109854	0.111967	0.0042253	0.0042253	0.0063379	0.0063379	0.718259
0.095066	0.0253512	0.411946		0.0443645	0.0042253	0.0335103	0.49011	0.0443645	0.0335103	0.0335103	0.0528147	0.0335103	0.0335103	0.15633	0.384484
0.0335103	0.166893	0.031689		0.0169009	0.0335103	0.0335103	0.0169009	0.0335103	0.160555	0.0760529	0.0084505	0.0335103	0.236606	0.0042253	1.35202
0.0335103	0.0335103	0.0126757		0.0042253	0.0042253	0.0335103	0.139429	0.0084505	0.0401393	0.0105631	0.114079	0.0335103	0.361247	0.433073	0.0335103
0.0464771	0.0335103	0.464759		0.0335103	0.0084505	0.0335103	0.0335103	0.0105631	0.143654	0.0443645	0.276745	0.0335103	0.17323	0.0042253	1.03936
0.0335103	0.0335103	0.0507022		0.0335103	0.0063379	0.0335103	0.0359142	0.0335103	0.0063379	0.0126757	0.0697152	0.0335103	0.449973	0.0147883	0.0126757
0.661233	0.342233	0.0443645		0.0335103	0.0042253	0.105629	0.221819	0.0042253	0.120417	0.0507022	0.0338017	0.0335103	0.0929534	0.0335103	0.0232386
0.276745	0.0335103	0.0507022		0.0335103	0.0042253	0.0042253	0.0274639	0.124642	0.0042253	0.0335103	0.169005	0.0084505	0.0335103	0.0042253	0.0507022
0.0335103	0.0063379	0.0190134		0.0335103	0.0549274	0.0335103	0.0147883	0.0929534	0.0335103	0.217594	0.0335103	0.0042253	0.0042253	0.435184	0.202806
0.0528147	0.0335103	0.0042253		0.0335103	0.492223	0.0335103	0.0063379	0.0084505	0.0169009	0.0335103	0.0929534	0.0335103	0.528135	0.0274639	0.219706
0.0335103	0.0335103	0.0063379		0.0211261	0.0063379	0.0697152	0.0126757	0.0335103	0.061265	0.0335103	0.116192	0.0042253	0.177455	0.0335103	0.202806
0.0335103	0.0335103	0.0507022		0.211256	0.0105631	0.145767	0.0147883	0.0335103	0.0126757	0.0232386	0.0335103	0.0232386	0.251394	0.0042253	0.0570397
0.0335103	0.0335103	0.526021		0.0063379	0.0063379	0.0042253	0.0401393	0.0335103	0.0169009	0.0929534	0.0169009	0.0335103	0.154217	0.0335103	0.228156
0.0335103	0.0232386	0.0338017		0.120417	0.0295765	0.0335103	0.0042253	0.0042253	0.0253514	0.0063379	0.0232386	0.0084505	0.0084505	0.0335103	0.118304
0.0335103	0.378147	1.1788		0.0335103	0.0084505	0.0335103	0.0253514	0.0042253	0.0105631	0.0654902	0.114079	0.0105631	0.0232386	0.0169009	0.0126757
0.0253514	0.204918	0.0169009		0.0335103	0.230269	0.0335103	0.107741	0.0335103	0.0063379	0.0335103	0.0063379	0.0042253	0.0084505	0.0063379	0.031689
0.0042253	0.0335103	0.0147883		0.0335103	0.0084505	0.0335103	0.105629	0.0335103	0.0063379	0.042252	0.0253514	0.0335103	0.0169009	0.0335103	0.236606
0.0335103	0.124642	0.0338017		0.0401393	0.0063379	0.0335103	0.107741	0.0042253	0.0084505	0.114079	0.0042253	0.0335103	0.095066	0.0042253	0.0042253
0.0295765	0.0335103	0.090841		0.0063379	0.0335103	0.101404	0.228156	0.0042253	0.0126757	0.0126757	0.0335103	0.0042253	0.0335103	0.0211261	0.0335103
0.0335103	0.0335103	0.185906		0.090841	0.169005	0.0335103	0.285195	0.0335103	0.0042253	0.0042253	0.0253514	0.0063379	0.0042253	0.0105631	0.0147883
0.0126757	0.0335103	0.0633778		0.0335103	0.0507022	0.0042253	0.095066	0.0359142	0.0335103	0.0718279	0.031689	0.042252	0.0084505	0.0335103	0.0042253
0.0335103	0.0335103	0.0781655		0.0443645	0.031689	0.0042253	0.0253514	0.0063379	0.0676026	0.0042253	0.185906	0.0042253	0.031689	0.0335103	0.149993
0.166893	0.0335103	0.0084505		0.0335103	0.0084505	0.0335103	0.175343	0.361247	0.213369	0.171118	0.0190134	0.0401393	0.158443	0.0335103	0.276745
0.0335103	0.0335103	0.627416		0.0126757	0.0063379	0.0335103	0.0063379	0.0335103	0.0697152	0.200693	0.0335103	0.0042253	0.114079	0.0105631	0.0443645
0.0443645	0.124642	0.031689		0.084503	0.061265	0.0335103	0.031689	0.0126757	0.0169009	0.0063379	0.0042253	0.0042253	0.0335103	0.0084505	0.0335103
0.0335103	0.0335103	0.14788		0.0335103	0.196468	0.0335103	0.0335103	0.0042253	0.0335103	0.042252	0.15633	0.0063379	0.169005	0.0335103	0.0335103
0.152105	0.291532	0.0718279		0.0335103	0.27252	0.0335103	0.084503	0.221819	0.0042253	0.17323	0.0274639	0.0295765	0.095066	0.107741	0.0042253
0.496448	0.0042253	0.042252		0.0042253	0.327445	0.0335103	0.447859	0.0147883	0.0063379	0.0211261	0.192244	0.0335103	0.299982	0.211256	0.0739403
0.0042253	0.0211261	0.0507022		0.0084505	0.0335103	0.0335103	0.0295765	0.0823906	0.0253514	0.207031	0.126754	0.0335103	0.0549274	0.0084505	0.0443645
0.0295765	0.0084505	0.105629		0.0042253	0.0335103	0.0063379	0.042252	0.0335103	0.0063379	0.0485898	0.0190134	0.0126757	0.0866157	0.107741	0.0295765
0.0335103	0.215481	0.0528147		0.0335103	0.0042253	0.0335103	0.0992913	0.0485898	0.0335103	0.031689	0.160555	0.0335103	0.0042253	0.352795	0.0253514
0.0335103	0.0335103	0.0335103		0.0335103	0.0335103	0.0042253	0.0190134	0.0063379	0.350683	0.0042253	0.061265	0.0335103	0.0190134	0.0335103	0.409835
0.0335103	0.0676026	0.551376		0.0335103	0.0335103	0.0335103	0.0126757	0.0042253	0.0042253	0.0359142	0.101404	0.0335103	0.17323	0.62319	0.0063379
0.0042253	0.0335103	0.0042253		0.0042253	0.0084505	0.0335103	0.0335103	0.0335103	0.0084505	0.0190134	0.160555	0.0335103	0.0335103	0.135205	0.836561
0.0042253	0.0335103	0.0485898		0.0335103	0.0042253	0.0063379	0.0335103	0.0335103	0.0335103	0.084503	0.0063379	0.0335103	0.616861	0.0169009	0.0866157
0.0335103	0.0105631	0.321108		0.0042253	0.0105631	0.0084505	0.0253514	0.0335103	0.0464771	0.0147883	0.0084505	0.0042253	0.13098	0.090841	0.0147883
0.0335103	0.061265	0.0549274		0.299982	0.0042253	0.0335103	0.0335103	0.0042253	0.0042253	0.0697152	0.0591524	0.0335103	0.0992913	0.264069	0.105629
0.0335103	0.0042253	0.18168		0.0042253	0.0042253	0.0042253	0.0802782	0.0335103	0.0335103	0.0190134	0.0335103	0.0335103	0.0485898	0.118304	0.268294
0.0335103	0.369696	0.859808		0.0335103	0.0105631	0.0335103	0.0335103	0.0335103	0.0335103	0.209143	0.0042253	0.0335103	0.0992913	0.0507022	0.0802782
0.209143	0.0335103	0.709818		0.0335103	0.0063379	0.111967	0.0084505	0.0335103	0.0084505	0.0063379	0.0335103	0.0253514	0.0211261	0.133092	0.0485898
0.0335103	0.0335103	0.0654902		0.0335103	0.0042253	0.0335103	0.0063379	0.0042253	0.14788	0.0063379	0.0253514	0.0335103	0.217594	0.0295765	0.0063379
0.0335103	0.0464771	0.236606		0.0335103	0.0042253	0.0105631	0.143654	0.0126757	0.0335103	0.0084505	0.0126757	0.0042253	0.0335103	0.0126757	0.111967
0.118304	0.0781655	0.0147883		0.0335103	0.0063379	0.0042253	0.0380269	0.152105	0.0591524	0.0335103	0.0232386	0.0335103	0.0084505	0.031689	0.0485898
0.0063379	0.0042253	0.0802782		0.0335103	0.0335103	0.0084505	0.0295765	0.0147883	0.0464771	0.031689	0.0295765	0.0335103	0.0335103	0.236606	0.031689
0.0335103	0.0042253	0.864034		0.245057	0.0929534	0.0084505	0.0105631	0.0335103	0.0739403	0.0335103	0.0335103	0.0063379	0.0042253	0.107741	0.109854
0.0485898	0.0335103	0.105629		0.0335103	0.152105	0.084503	0.0063379	0.0335103	0.169005	0.0042253	0.0335103	0.0335103	0.0105631	0.223931	0.259844
0.0335103	0.230269	1.8759		0.0063379	0.0335103	0.0335103	0.0232386	0.0335103	0.0253514	0.116192	0.0042253	0.0335103	0.0335103	0.0335103	0.124642
0.0335103	0.0335103	0.124642		0.141542	0.0335103	0.0335103	0.230269	0.0335103	0.0042253	0.283083	0.0335103	0.0335103	0.0232386	0.0335103	0.0190134
0.0335103	0.0084505	0.580943		0.0042253	0.0042253	0.0335103	0.0443645	0.0042253	0.0232386	0.0338017	0.13098	0.0335103	0.126754	0.0335103	0.0042253
0.221819	0.0485894	0.124642		0.0335103	0.0084505	0.0335103	0.0992913	0.0063379	0.0147883	0.0295765	0.0443645	0.0335103	0.0335103	0.0042253	0.0443645
0.0105631	0.0335103	0.500673		0.0335103	0.0335103	0.0528147	0.0105631	0.0335103	0.0232386	0.0190134	0.0169009	0.0042253	0.0042253	0.0042253	0.061265
0.0335103	0.0335103	0.0697152		0.0335103	0.0042253	0.0335103	0.0126757	0.0335103	0.0084505	0.0190134	0.185906	0.0335103	0.418284	0.0335103	0.0169009
0.0335103	0.15633	0.0443645		0.0335103	0.0335103	0.0335103	0.103516	0.0335103	0.0042253	0.0105631	0.0697152	0.0084505	0.0042253	0.0335103	0.0042253
0.0335103	0.0335103	0.0147883		0.0335103	0.0084505	0.0335103	0.0335103	0.0147883	0.0063379	0.0126757	0.0380269	0.0042253	0.122529	0.0042253	0.0274639
0.0335103	0.0335103	2.19699		0.0335103	0.0335103	0.0084505	0.0654902	0.0042253	0.0042253	0.0126757	0.0335103	0.0335103	0.464759	0.0335103	0.0633778
0.145767	0.0335103	0.200693		0.133092	0.0335103	0.111967	0.0063379	0.25562	0.0211261	0.0232386	0.116192	0.0335103	0.280969	0.0190134	0.251394
0.0654902	0.0335103	0.283083		0.0335103	0.0335103	0.0335103	0.116192	0.042252	0.0335103	0.031689	0.0335103	0.0105631	0.135205	0.0126757	0.0147883
0.185906	0.169005	0.0063379		0.0042253	0.0063379	0.0042253	0.0274639	0.0042253	0.0335103	0.188018	0.0042253	0.192244	0.0528147	0.0335103	0.13098
0.0190134	0.0335103	0.0335103		0.0190134	0.0042253		0.124642	0.0042253	0.0063379	0.0190134	0.236606	0.0063379	0.0485898	0.0335103	0.188018
0.0190134	0.0335103	0.139429		0.0338017	0.194356		0.0063379	0.0335103	0.0335103	0.0335103	0.185906	0.0084505	0.0147883	0.0042253	0.0335103
0.0147883	0.0335103	0.299982		0.0335103	0.0042253		0.149993	0.0359142	0.0335103	0.0295765	0.0190134	0.0063379	0.0190134	0.158443	0.354909
0.0042253	0.0335103	0.0697152		0.0335103	0.135205		0.24717	0.0335103	0.0335103	0.0335103	0.0063379	0.0335103	0.259844	0.0335103	0.0528147
0.0335103	0.111967	0.0359142		0.0338017	0.0042253		0.0042253	0.0335103	0.0042253	0.0063379	0.0084505	0.0063379	0.268294	0.226044	0.0042253
0.0507022	0.0335103	0.477435		0.0335103	0.0063379		0.0380269	0.0063379	0.0335103	0.0042253	0.0042253	0.0335103	0.0335103	0.564056	0.0042253
0.0042253	0.0591524	0.0042253		0.0063379	0.0190134		0.0338017	0.0335103	0.0335103	0.0335103	0.0274639	0.0335103	0.0335103	0.0147883	0.0063379
0.126754	0.0335103	0.042252		0.0335103	0.0335103		0.0063379	0.0718279	0.0084505	0.0063379	0.0126757	0.0084505	0.0781655	0.0335103	0.0063379
0.242945	0.0633774	0.0992913		0.0042253	0.0335103		0.0169009	0.0335103	0.0274639	0.253507	0.0105631	0.0063379	0.344345	0.0190134	0.116192
0.0335103	0.0335103	0.0335103		0.0528147	0.084503		0.0443645	0.0190134	0.0338017	0.0335103	0.0335103	0.0232386	0.154217	0.0335103	0.0359142
0.175343	0.116192	0.0335103		0.0335103	0.0042253		0.0570397	0.0335103	0.0042253	0.0335103	0.0042253	0.042252	0.0654902	0.0042253	0.0718279
0.0335103	0.0042253	0.0335103		0.0654902	0.0335103		0.0335103	0.0190134	0.0335103	0.13098	0.0042253	0.0335103	0.0335103	0.0335103	0.234494
0.0335103	0.0335103	0.0084505		0.0063379	0.0335103		0.0335103	0.0335103	0.0063379	0.0338017	0.0042253	0.0042253	0.0335103	0.0338017	0.0866157
0.0718279	0.0295765			0.0084505	0.0042253		0.0335103	0.0063379	0.0147883	0.0063379	0.0335103	0.0126757	0.0063379	0.0335103	0.0380269
0.0335103	0.0063379			0.0063379	0.0335103		0.0063379	0.0042253	0.0866157	0.0380269	0.0042253	0.0335103	0.0084505	0.0063379	0.042252
0.0335103	0.128867			0.0335103	0.0335103		0.0335103	0.0823906	0.0211261	0.0084505	0.0335103	0.0335103	0.0211261	0.0335103	0.152105
0.0335103	0.0443645			0.0359142	0.0335103		0.0042253	0.0335103	0.0335103	0.47321	0.0105631	0.0147883	0.0063379	0.0042253	0.128867
0.0335103	0.095066			0.0042253	0.0042253		0.0335103	0.0042253	0.0591524	0.0464771	0.0335103	0.0335103	0.0971787	0.0084505	0.042252
0.0335103	0.0335103			0.0295765	0.0042253		0.0335103	0.0335103	0.0105631	0.0528147	0.0169009	0.0335103	0.122529	0.0335103	0.604193
0.0335103	0.0335103			0.0084505	0.0359142		0.0338017	0.0042253	0.0042253	0.0274639	0.521797	0.0232386	0.0295765	0.0042253	0.251394
0.0335103	0.0335103			0.0042253	0.0335103		0.0169009	0.0147883	0.0042253	0.0042253	0.0633778	0.0335103	0.0042253	0.0126757	0.593627
0.0335103	0.152105			0.0063379	0.0718279		0.0295765	0.0335103	0.0335103	0.118304	0.0063379	0.0335103	0.0335103	0.0295765	0.238719
0.160555	0.0042253			0.0335103	0.0042253		0.0335103	0.0335103	0.0063379	0.0335103	0.0591524	0.0335103	0.0591524	0.0042253	0.0507022
0.0335103	0.0295765			0.0042253	0.0335103		0.0335103	0.0084505	0.0042253	0.0335103	0.0147883	0.0084505	0.287308	0.0335103	0.211256
0.314771	0.542916			0.0042253	0.0042253		0.0042253	0.0335103	0.0335103	0.0335103	0.0697152	0.0335103	0.0359142	0.0485898	0.118304
0.0335103	0.0335103			0.0169009	0.0084505		0.0335103	0.0359142	0.031689	0.0063379	0.0042253	0.0335103	0.0063379	0.0084505	0.105629
0.0042253	0.0063379			0.0063379	0.0042253		0.0335103	0.0232386	0.0335103	0.0359142	0.0211261	0.0335103	0.0335103	0.0084505	0.0338017
0.0335103	0.107741			0.0335103	0.0063379		0.0063379	0.0335103	0.0105631	0.0335103	0.031689	0.0042253	0.16478	0.0126757	0.251394
0.0335103	0.0335103			0.0042253	0.397159		0.0335103	0.0335103	0.0274639	0.0211261	0.0697152	0.0084505	0.399271	0.0335103	0.175343
0.0802782	0.0335103			0.0042253	0.0042253		0.0335103	0.0335103	0.0335103	0.0338017	0.0335103	0.0335103	0.103516	0.0335103	0.0335103
0.0295765	0.0335103			0.0335103	0.0335103		0.0190134	0.202806	0.0042253	0.122529	0.0823906	0.0335103	0.0359142	0.0126757	0.0507022
0.175343	0.0335103			0.122529	0.0335103		0.0126757	0.0335103	0.213369	0.103516	0.403497	0.0335103	0.031689	0.0063379	0.0866157
0.0380269	0.0042253			0.0335103	0.0042253		0.0335103	0.0042253	0.0063379	0.0335103	0.105629	0.0063379	0.0887282	0.0042253	0.154217
0.0335103	0.166893			0.0335103	0.0335103		0.0335103	0.0335103	0.0802782	0.0169009	0.325333	0.0335103	0.0084505	0.0335103	0.542916
0.0335103	0.126754			0.0042253	0.0042253		0.310545	0.0335103	0.0063379	0.0335103	0.0335103	0.0335103	0.0485898	0.0063379	0.0063379
0.0335103	0.0335103			0.0335103	0.0570397		0.0335103	0.0042253	0.0232386	0.0084505	0.0274639	0.0335103	0.0380269	0.0335103	0.124642
0.0335103	0.0992909			0.0084505	0.312658		0.0335103	0.0335103	0.0335103	0.0042253	0.0992913	0.0335103	0.0335103	0.0211261	0.0866157
0.0335103	0.204918			0.0335103	0.0084505		0.0042253	0.15633	0.0335103	0.0335103	0.0042253	0.0084505	0.183793	0.0335103	0.0971787
0.0335103	0.0335103			0.0295765	0.0335103		0.0335103	0.135205	0.0335103	0.109854	0.105629	0.0335103	0.0335103	0.0335103	0.0295765
0.190131	0.468985			0.0232386	0.0335103		0.0335103	0.128867	0.0190134	0.0335103	0.0443645	0.0335103	0.0126757	0.0063379	0.0274639
0.0335103	0.0335103			0.0335103	0.101404		0.0232386	0.0042253	0.0335103	0.0084505	0.0335103	0.0335103	0.0591524	0.0042253	0.346458
0.462647	0.0335103			0.213369	0.0063379		0.0335103	0.0190134	0.0335103	0.0042253	0.0335103	0.245057	0.061265	0.192244	0.0063379
0.0335103	0.0335103			0.0335103	0.0335103		0.318996	0.0042253	0.0042253	0.0335103	0.0335103	0.0063379	0.0335103	0.264069	0.0105631
0.0042253	0.0105631			0.0335103	0.0335103		0.0211261	0.0084505	0.0042253	0.0063379	0.0295765	0.042252	0.0211261	0.13098	0.0042253
0.0335103	0.0295765			0.0042253	0.0335103		0.0335103	0.0528147	0.0147883	0.0359142	0.0042253	0.133092	0.0335103	0.41406	0.0042253
0.449973	0.0335103			0.0335103	0.0084505		0.325333	0.310545	0.0063379	0.084503	0.0042253	0.0084505	0.0232386	0.145767	0.422509
0.0591524	0.0335103			0.0335103	0.0335103		0.0633778	0.213369	0.0084505	0.061265	0.0335103	0.0359142	0.0570397	0.0654902	0.213369
0.0335103	0.0335103			0.0380269	0.103516		0.0042253	0.0295765	0.0335103	0.0335103	0.124642	0.0147883	0.061265	0.0335103	0.0042253
0.0335103	0.338008			0.0042253	0.0335103		0.101404	0.0147883	0.0335103	0.0063379	0.0335103	0.0042253	0.0063379	0.0042253	0.0063379
0.0335103	0.0335103			0.0335103	0.0335103		0.0084505	0.0464771	0.0042253	0.0335103	0.18168	0.0335103	0.0335103	0.0380269	0.084503
0.0042253	0.0654902			0.0335103	0.0147883		0.0335103	0.0739403	0.0335103	0.0335103	0.0335103	0.0063379	0.0063379	0.0401393	0.160555
0.0042253	0.0335103			0.0063379	0.268294		0.41406	0.0042253	0.0335103	0.188018	0.0335103	0.0042253	0.0335103	0.555598	0.0338017
0.0528147	0.0335103			0.0084505	0.0042253		0.188018	0.0084505	0.0063379	0.0063379	0.0042253	0.0335103	0.0042253	0.0866157	0.0105631
0.0335103	0.0338017			0.0335103	0.0335103		0.0335103	0.190131	0.0335103	0.0063379	0.0335103	0.0335103	0.0190134	0.591512	0.13098
0.0335103	0.359134			0.042252	0.0335103		0.0042253	0.0084505	0.0338017	0.031689	0.0549274	0.0335103	0.0147883	0.0211261	0.0042253
0.0335103	0.0042253			0.0335103	0.0253514		0.0654902	0.0169009	0.0126757	0.0063379	0.0190134	0.14788	0.126754	0.0464771	0.0232386
0.0335103	0.0190134			0.0335103	0.0105631		0.0147883	0.0042253	0.0042253	0.0063379	0.513347	0.0169009	0.346458	0.0126757	0.454197
0.0335103	0.0042253			0.0335103	0.194356		0.0063379	0.0063379	0.0335103	0.217594	0.0335103	0.139429	0.0126757	0.0335103	0.0042253
0.242945	0.0295765			0.0335103	0.0335103		0.0042253	0.0549274	0.0335103	0.479548	0.0335103	0.0676026	0.350683	0.0335103	0.0063379
0.0335103	0.0335103			0.0335103	0.0063379		0.0147883	0.143654	0.0063379	0.0633778	0.183793	0.0295765	0.234494	0.0042253	0.0063379
0.0335103	0.0335103			0.0105631	0.120417		0.0063379	0.149993	0.0335103	0.0697152	0.0887282	0.0105631	0.0253514	0.0335103	0.0866157
0.042252	0.0063379			0.0063379	0.0528147		0.0105631	0.107741	0.0042253	0.0335103	0.228156	0.0549274	0.145767	0.0042253	0.0335103
0.0274639	0.0335103			0.0335103	0.0253514		0.0169009	0.0335103	0.221819	0.0063379	0.228156	0.487998	0.0084505	0.0335103	0.202806
0.0335103	0.536585			0.0335103	0.0147883		0.0760529	0.321108	0.0169009	0.0105631	0.16478	0.0232386	0.0042253	0.0063379	0.0126757
0.0335103	0.0335103			0.0335103	0.0042253		0.0147883	0.251394	0.270407	0.0042253	0.0335103	0.0335103	0.18168	0.0335103	0.0380269
0.188018	0.0335103			0.0335103	0.0042253		0.0126757	0.0042253	0.143654	0.0335103	0.0042253	0.0335103	0.0084505	0.0335103	0.126754
0.604193	0.342233			0.0042253	0.0335103		1.21681	0.0042253	0.0295765	0.0335103	0.0042253	0.0335103	0.0147883	0.0335103	0.0190134
0.0063379	0.0063379			0.0335103	0.160555		0.0549274	0.0335103	0.226044	0.0335103	0.18168	0.0042253	0.0063379	0.0063379	0.0549274
0.0335103	0.0335103			0.0042253	0.031689		0.0380269	0.0126757	0.139429	0.0335103	0.042252	0.0105631	0.0042253	0.0335103	0.0084505
0.114079	0.0335103			0.0042253	0.0042253		0.295758	0.0063379	0.0063379	0.0335103	0.0063379	0.0084505	0.200693	0.0335103	0.0633778
0.0063379	0.0232386			0.0253514	0.0591524		0.0042253	0.0401393	0.158443	0.0253514	0.103516	0.0063379	0.0335103	0.0335103	0.0042253
0.0042253	0.160555			0.0335103	0.0232386		0.0335103	0.0802782	0.295758	0.204918	0.0335103	0.0335103	0.0335103	0.171118	0.0063379
0.0335103	0.0335103			0.0335103	0.154217		0.031689	0.158443	0.0042253	0.0042253	0.0335103	0.0335103	0.0126757	0.0042253	0.0253514
0.169005	0.0528147			0.0633778	0.0335103		0.0105631	0.084503	0.0063379	0.0063379	0.0042253	0.0335103	0.0063379	0.14788	0.0335103
0.0042253	0.0549274			0.0335103	0.0042253		0.0084505	0.0063379	0.0147883	0.0528147	0.0042253	0.0335103	0.0063379	0.103516	0.0105631
0.0335103	0.179568			0.0335103	0.0335103		0.0335103	0.0063379	0.0126757	0.0232386	0.0063379	0.0335103	0.0042253	0.0335103	0.0866157
0.0063379	0.084503			0.177455	0.0335103		0.513347	0.17323	0.0335103	0.0443645	0.0335103	0.0335103	0.0335103	0.0335103	0.090841
0.0063379	0.0084505			0.0295765	0.0335103		0.0359142	0.0232386	0.101404	0.0042253	0.0063379	0.0335103	0.0232386	0.0335103	0.418284
0.0169009	0.333783			0.0126757	0.0335103		0.221819	0.0335103	0.0105631	0.0335103	0.0335103	0.0335103	0.0697152	0.0042253	0.0126757
0.0335103	0.0507022			0.0042253	0.346458		0.0335103	0.0335103	0.0042253	0.0147883	0.0335103	0.0335103	0.0084505	0.0105631	0.0169009
0.0335103	0.270407			0.0042253	0.0042253		0.0335103	0.0335103	0.0063379	0.0105631	0.0335103	0.0084505	0.0295765	0.111967	0.335896
0.378147	0.0335103			0.0335103	0.0084505		0.0105631	0.0802782	0.0105631	0.0105631	0.0042253	0.0147883	0.128867	0.0084505	0.386597
0.0042253	0.0335103			0.0042253	0.0063379		0.0274639	0.0335103	0.0335103	0.0126757	0.0042253	0.0335103	0.0253514	0.0335103	0.0335103
0.0335103	0.0169009			0.0042253	0.0063379		0.0084505	0.0126757	0.18168	0.0335103	0.0063379	0.0042253	0.0232386	0.0042253	0.084503
0.0335103	0.0335103			0.0335103	0.0359142		0.0084505	0.0042253	0.0042253	0.0335103	0.0335103	0.0105631	0.0335103	0.0126757	0.403497
0.0697152	0.0335103			0.0335103	0.143654		0.0485898	0.0126757	0.0211261	0.0335103	0.0335103	0.0084505	0.232381	0.0042253	0.0359142
0.0335103	0.439409			0.084503	0.0042253		0.0232386	0.0335103	0.0042253	0.0335103	0.0335103	0.0335103	0.0401393	0.0335103	0.0232386
0.18168	0.0335103			0.0335103	0.0084505		0.0126757	0.0697152	0.0253514	0.0169009	0.0335103	0.0147883	0.0359142	0.0105631	0.312658
0.0335103	0.64433			0.0042253	0.0169009		0.0126757	0.0335103	0.0335103	0.0126757	0.0042253	0.0335103	0.0253514	0.0380269	0.0105631
0.120417	0.0335103			0.0042253	0.0063379		0.0335103	0.0338017	0.0084505	0.0063379	0.0063379	0.0335103	0.031689	0.0105631	0.407721
0.0335103	0.0335103			0.0335103	0.0211261		0.0084505	0.0549274	0.0063379	0.118304	0.0335103	0.0335103	0.0335103	0.128867	0.333783
0.0335103	0.0295765			0.0063379	0.568276		0.0063379	0.388709	0.0147883	0.0147883	0.084503	0.0105631	0.0169009	0.101404	0.0992913
0.0232386	0.0570397			0.0335103	0.158443		0.0697152	0.0211261	0.0147883	0.0335103	0.0042253	0.0335103	0.0335103	0.0042253	0.0739403
0.095066	0.236606			0.0335103	0.0335103		0.0335103	0.0232386	0.0063379	0.0335103	0.0232386	0.0335103	0.122529	0.0253514	0.718259
0.0335103	0.0232386			0.0335103	0.0335103		0.0063379	0.0063379	0.0335103	0.0042253	0.0335103	0.0335103	0.0063379	0.0042253	0.253507
0.0042253	0.0335103			0.0335103	0.0042253		0.0105631	0.325333	0.0335103	0.0063379	0.095066	0.0042253	0.0063379	0.0042253	0.0380269
0.0335103	0.031689			0.0042253	0.0335103		0.0042253	0.202806	0.0335103	0.0335103	0.0335103	0.0084505	0.149993	0.0063379	0.0063379
0.0105631	0.0335103			0.0335103	0.133092		0.090841	0.566155	0.0335103	0.0335103	0.0126757	0.0335103	0.0485898	0.0042253	0.0147883
0.0042253	0.0190134			0.242945	0.0063379		0.0042253	0.0126757	0.031689	0.0042253	0.0335103	0.0335103	0.0084505	0.0147883	0.0042253
0.0335103	0.0063379			0.0335103	0.0211261		0.71404	0.0042253	0.0063379	0.0063379	0.0084505	0.0335103	0.0105631	0.0105631	0.0147883
0.0570397	0.0084505			0.0335103	0.0063379		0.0697152	0.179568	0.0335103	0.0063379	0.0042253	0.0042253	0.0105631	0.0063379	0.0335103
0.0335103	0.114079			0.0335103	0.0335103		0.0126757	0.0190134	0.0335103	0.0335103	0.0335103	0.0063379	0.084503	0.0042253	0.0335103
0.407722	0.162668			0.0042253	0.0274639		0.0190134	0.0633778	0.0063379	0.0295765	0.0443645	0.0042253	0.0063379	0.0063379	0.194356
0.0443645	0.0359142			0.0335103	1.18723		0.0232386	0.228156	0.0335103	0.0335103	0.0335103	0.0042253	0.190131	0.0042253	0.0042253
0.101404	0.0274639			0.0335103	0.0335103		0.0335103	0.031689	0.0084505	0.0084505	0.0335103	0.0633778	0.0335103	0.0335103	0.452085
0.0335103	0.0042253			0.0084505	0.0232386		0.0190134	0.0295765	0.0063379	0.0063379	0.0232386	0.0147883	0.0042253	0.0335103	0.608419
0.0335103	0.0105631			0.0335103	0.0169009		0.0042253	0.0042253	0.0084505	0.0335103	0.0232386	0.0042253	0.0335103	0.0126757	0.388709
0.0335103	0.0335103			0.0335103	0.0063379		0.0063379	0.0401393	0.0335103	0.0335103	0.0042253	0.0335103	0.0335103	0.0042253	0.357021
0.0335103	0.0335103			0.0335103	0.0485898		0.0126757	0.0232386	0.0042253	0.0084505	0.0335103	0.0042253	0.0335103	0.0105631	0.359134
0.217594	0.0443645			0.105629	0.0338017		0.0335103	0.0147883	0.0335103	0.0335103	0.0335103	0.101404	0.0063379	0.0063379	0.245057
0.0335103	0.0042253			0.0335103	0.0335103		0.0084505	0.0042253	0.0335103	0.0042253	0.0335103	0.0042253	0.0190134	0.0042253	0.230269
0.0335103	0.0781655			0.0105631	0.0335103		0.0042253	0.0335103	0.0232386	0.0335103	0.0335103	0.0063379	0.0335103	0.0126757	0.0335103
0.0380269	0.0063379			0.0105631	0.0335103		0.0084505	0.0063379	0.0042253	0.0335103	0.0042253	0.0335103	0.0335103	0.0335103	0.0084505
0.0654902	0.0335103			0.0335103	0.0147883		0.0126757	0.0335103	0.0105631	0.0359142	0.0335103	0.0335103	0.0335103	0.0063379	0.659107
0.042252	0.794314			0.0295765	0.0063379		0.0063379	0.0105631	0.0042253	0.0335103	0.0335103	0.0042253	0.0042253	0.0042253	0.633764
0.141542	0.126754			0.0335103	0.0042253		0.0063379	0.0591524	0.0335103	0.0335103	0.031689	0.0063379	0.0063379	0.0335103	0.0274639
0.0359142	0.240832			0.0335103	0.0485898		0.0295765	0.0063379	0.0126757	0.0042253	0.0190134	0.0063379	0.0335103	0.0147883	0.031689
0.0335103	0.0211261			0.0063379	0.0042253		0.0042253	0.0126757	0.0105631	0.0169009	0.0063379	0.0335103	0.0042253	0.0147883	0.192244
0.230269	0.0042253			0.0335103	0.031689		0.107741	0.031689	0.0126757	0.0401393	0.126754	0.0335103	0.0105631	0.0147883	0.0929534
0.0335103	0.0126757			0.0042253	0.0335103		0.171118	0.0633778	0.0147883	0.0211261	0.0042253	0.0335103	0.0042253	0.0335103	0.304207
0.0042253	0.0359142			0.0335103	0.0084505		0.0335103	0.149993	0.0335103	0.0335103	0.0169009	0.0335103	0.0042253	0.0335103	0.661215
0.0335103	0.466872			0.0866157	0.0084505		0.0211261	0.0105631	0.0335103	0.0084505	0.042252	0.0335103	0.0929534	0.0042253	0.0549274
0.0063379	0.0211261			0.0042253	0.0253514		0.105629	0.0359142	0.0063379	0.0335103	0.0126757	0.0042253	0.0335103	0.0105631	0.0335103
0.0042253	0.0335103			0.0335103	0.0042253		0.0866157	0.0335103	0.0105631	0.0335103	0.0105631	0.0335103	0.0335103	0.0335103	0.0084505
0.042252	0.0335103			0.352795	0.0126757		0.0211261	0.0335103	0.0335103	0.0335103	0.0823906	0.0335103	0.0335103	0.0335103	0.0063379
0.0335103	0.0380269			0.0335103	0.0335103		0.283083	0.496448	0.0335103	0.0147883	0.0042253	0.0084505	0.0063379	0.0335103	0.0042253
0.0507022	0.0570397			0.0335103	0.0169009		0.0042253	0.0211261	0.0335103	0.0335103	0.0335103	0.0335103	0.0063379	0.0335103	0.0105631
0.0335103	0.0718279			0.0042253	0.0190134		0.0676026	0.0654902	0.0169009	0.0105631	0.0335103	0.0063379	0.0335103	0.0105631	0.0335103
0.0335103	0.0335103			0.0335103	0.0042253		0.0084505	0.0335103	0.0126757	0.0042253	0.0190134	0.0042253	0.0359142	0.0335103	0.095066
0.0401393	0.0190134			0.0464771	0.0654902		0.0718279	0.0042253	0.0042253	0.0335103	0.0042253	0.0335103	0.0338017	0.0042253	0.0359142
0.0335103	0.0084505			0.0042253	0.0335103		0.0190134	0.0105631	0.0335103	0.0042253	0.0335103	0.0042253	0.0042253	0.0335103	0.0295765
0.0042253	0.0335103			0.0335103	0.0335103		0.0042253	0.0338017	0.0042253	0.0042253	0.0335103	0.0335103	0.122529	0.0335103	0.0633778
0.0335103	1.25907			0.0335103	0.0335103		0.162668	0.0063379	0.194356	0.0147883	0.0335103	0.0084505	0.0169009	0.0063379	0.118304
0.0335103	0.0335103			0.139429	0.0718279		0.0335103	0.0359142	0.0084505	0.0169009	0.0335103	0.0335103	0.0335103	0.0063379	0.141542
0.0042253	0.0335103			0.0274639	0.0443645		0.061265	0.0335103	0.0338017	0.154217	0.0105631	0.0335103	0.0335103	0.0084505	0.310545
0.0063379	0.0335103			0.0335103	0.0549274		0.0042253	0.0335103	0.0335103	0.0866157	0.0335103	0.0042253	0.0232386	0.0335103	0.154217
0.122529	0.0335103			0.0126757	0.0105631		0.0042253	0.0126757	0.0147883	0.0739403	0.0105631	0.0335103	0.0063379	0.0335103	0.388709
0.095066	0.109854			0.0063379	0.0335103		0.0042253	0.0063379	0.0084505	0.0781655	0.0335103	0.0335103	0.0335103	0.0105631	0.0253514
0.105629	0.0253512			0.0295765	0.0063379		0.0105631	0.0335103	0.0042253	0.061265	0.0335103	0.0335103	0.0147883	0.0335103	1.00346
	0.0190134			0.0335103	0.0063379		0.031689	0.0335103	0.0042253	0.0335103	0.0335103	0.0042253	0.0739403	0.0335103	0.137317
	0.183793			0.0335103	0.0105631		0.318996	0.0335103	0.0084505	0.0335103	0.0335103	0.0042253	0.084503	0.0335103	0.540811
	0.0654902			0.0042253	0.101404		0.133092	0.0335103	0.0126757	0.0335103	0.0042253	0.0359142	0.0063379	0.031689	0.0335103
	0.344345			0.0063379	0.0335103		0.0295765	0.0084505	0.0105631	0.0335103	0.213369	0.0105631	0.0335103	0.0335103	0.0335103
	0.0335103			0.0335103	0.207031		0.0697152	0.0084505	0.0335103	0.0042253	0.223931	0.0169009	0.0105631	0.0169009	0.0063379
	0.0042253			0.0335103	0.599969		0.0274639	0.0063379	0.0335103	0.0042253	0.0105631	0.0042253	0.378147	0.0335103	0.162668
	0.0335103			0.0042253	0.0335103		0.0464771	0.0335103	0.0063379	0.0335103	0.5725	0.0042253	0.0084505	0.0335103	0.633764
	0.0335103			0.0084505	0.0654902		0.031689	0.0335103	0.0042253	0.0084505	0.061265	0.0063379	0.0507022	0.0335103	0.0063379
	0.0335103			0.0190134	0.796432		0.0042253	0.0042253	0.0335103	0.0335103	0.118304	0.0042253	0.0105631	0.0335103	0.0335103
	0.0335103			0.0335103	0.0654902		0.139429	0.0084505	0.0042253	0.0335103	0.0781655	0.0335103	0.0042253	0.0335103	0.287308
	0.0335103			0.0380269	0.0335103		0.0084505	0.0063379	0.0063379	0.0335103	0.107741	0.0084505	0.0335103	0.0042253	0.042252
	0.0126757			0.0063379	0.0190134		0.0802782	0.0042253	0.0335103	0.0335103	0.0042253	0.0042253	0.0335103	0.16478	0.171118
	0.177455			0.0042253	0.0105631		0.447859	0.0335103	0.0335103	0.0335103	0.0190134	0.0295765	0.0042253	0.116192	0.16478
	0.0570397			0.107741	0.0105631		0.0126757	0.0063379	0.0335103	0.0335103	0.0274639	0.0335103	0.0126757	0.0335103	0.207031
	0.0042253			0.388709	0.223931		0.090841	0.0084505	0.0335103	0.0042253	0.0126757	0.0105631	0.0084505	0.0335103	0.253507
	0.0528147			0.16478	0.0971787		0.0105631	0.0335103	0.0335103	0.0335103	0.0335103	0.0063379	0.0042253	0.14788	0.0528147
	0.0063379			0.0105631	0.0042253		0.308433	0.0126757	0.0335103	0.0335103	0.0042253	0.0063379	0.0063379	0.0253514	0.0866157
	0.0126757			0.0042253	0.0570397		0.0105631	0.0253514	0.0084505	0.0169009	0.0335103	0.0335103	0.0211261	0.0042253	0.143654
	0.0380269			0.0335103	0.0464771		0.0126757	0.0126757	0.0335103	0.0335103	0.0042253	0.0335103	0.0335103	0.0147883	0.185906
	0.0211261			0.0335103	0.50701		0.128867	0.0335103	0.0335103	0.0042253	0.0335103	0.0335103	0.0169009	0.0654902	0.291532
	0.0335103			0.232381	0.0591524		0.0042253	0.0042253	0.0042253	0.0335103	0.0042253	0.0063379	0.0335103	0.0042253	0.401384
	0.135205				0.0335103		0.0169009	0.0335103	0.0676026	0.0335103	0.0147883	0.0042253	0.0042253	0.0042253	0.0676026
	0.0274639				0.0042253		0.0528147	0.0335103	0.0042253	0.0335103	0.0992913	0.0335103	0.0063379	0.0549274	0.0084505
	0.0335103				0.0335103		0.0335103	0.0126757	0.0126757	0.0042253	0.0105631	0.0169009	0.0126757	0.0335103	0.75839
	0.0359142				0.0084505		0.0335103	0.0147883	0.0335103	0.0335103	0.0126757	0.0042253	0.0335103	0.0335103	0.834459
	0.0169009				0.0335103		0.0992913	0.0335103	0.0335103	0.0335103	0.0295765	0.0042253	0.0084505	0.0042253	0.0335103
	0.061265				0.747842		0.0063379	0.0335103	0.0042253	0.0335103	0.107741	0.0126757	0.118304	0.0042253	0.0443645
	0.0084505				0.0335103		0.0380269	0.0335103	0.0042253	0.0335103	0.0335103	0.0335103	0.103516	0.0063379	0.342233
	1.40694				0.0507022		0.299982	0.0335103	0.0042253	0.0335103	0.0335103	0.0042253	0.0335103	0.0042253	0.238719
	0.0335103				0.0126757		0.0528147	0.0335103	0.0335103	0.0042253	0.0335103	0.0335103	0.0105631	0.0126757	0.0929534
	0.0335103				0.0401393		0.0335103	0.0335103	0.0274639	0.0335103	0.0105631	0.0335103	0.0401393	0.0507022	2.65544
	0.0335103				0.0126757		0.0063379	0.0335103	0.0335103	0.0485898	0.0335103	0.0335103	0.0063379	0.0042253	0.143654
	0.0042253				0.137317		0.139429	0.0507022	0.0084505	0.0335103	0.0507022	0.0335103	0.0335103	0.0063379	0.0335103
	0.0654902				0.0335103		0.0401393	0.0335103	0.0335103	0.0335103	0.0335103	0.0335103	0.0335103	0.0485898	0.192244
	0.0063379				0.0335103		0.0335103	0.0126757	0.0105631	0.0335103	0.0295765	0.0042253	0.0335103	0.0042253	0.238719
	0.289419				0.0169009		0.0147883	0.0042253	0.0335103	0.190131	0.0042253	0.0335103	0.0335103	0.0335103	1.07951
	0.0335103				0.299982		0.0253514	0.0232386	0.0063379	0.0359142	0.0335103	0.0335103	0.084503	0.0335103	0.242945
	0.0126757				0.0126757		0.285195	0.0042253	0.0084505	0.0211261	0.0335103	0.0335103	0.0253514	0.0169009	0.215481
	0.0335103				0.0335103		0.145767	0.0190134	0.0042253	0.0335103	0.0232386	0.0042253	0.0335103	0.0126757	0.466872
	0.0335103				0.0335103		0.0063379	0.0335103	0.0335103	0.0335103	0.0084505	0.0042253	0.0359142	0.0190134	0.200693
	0.0042253				0.0335103		0.0654902	0.0335103	0.0042253	0.0042253	0.0084505	0.0335103	0.0042253	0.0126757	0.0443645
	0.158443				0.0042253		0.29787	0.0063379	0.0335103	0.0335103	0.0335103	0.0042253	0.0335103	0.0042253	0.0654902
	0.0253512				0.0335103		0.458422	0.0335103	0.0211261	0.0335103	0.0335103	0.0507022	0.0105631	0.0335103	0.0063379
	0.401384				0.0063379		0.0570397	0.0335103	0.0335103	0.0335103	0.0105631	0.0126757	0.0084505	0.0147883	0.0063379
	0.221819				0.0335103		0.0063379	0.0335103	0.0042253	0.0335103	0.0105631	0.0654902	0.0335103	0.0335103	0.0443645
	0.0335103				0.16478		0.169005	0.0063379	0.0335103	0.0190134	0.0335103	0.0335103	0.0105631	0.0335103	0.0464771
	0.0169009				0.109854		0.0718279	0.0335103	0.0063379	0.0147883	0.0063379	0.0063379	0.0335103	0.0042253	0.369696
	0.242944				0.0591524		0.0042253	0.0335103	0.0042253	0.0042253	0.0335103	0.0335103	0.0485898	0.291532	0.0147883
	0.18168				0.0507022		0.0781655	0.139429	0.0335103	0.105629	0.0063379	0.0105631	0.0042253	0.0105631	0.456309
	0.295757				0.0781655		0.0042253	0.0042253	0.0335103	0.0335103	0.0042253	0.0042253	0.0335103	0.0335103	0.042252
	0.0063379				0.0063379		0.0042253	0.0169009	0.0147883	0.0253514	0.0335103	0.0084505	0.0335103	0.0105631	0.109854
	0.0042253				0.0528147		0.0335103	0.0042253	0.0335103	0.0169009	0.0335103	0.0401393	0.0042253	0.0335103	0.346458
	0.0335103				0.0063379		0.103516	0.0063379	0.0042253	0.0676026	0.0335103	0.0335103	0.0063379	0.0335103	0.0485898
	0.0335103				0.0084505		0.0126757	0.0485898	0.0042253	0.0042253	0.0042253	0.0063379	0.0335103	0.0335103	0.031689
	0.0335103				0.209143		0.0335103	0.0335103	0.0335103	0.0042253	0.0335103	0.211256	0.0335103	0.390821	0.0335103
	0.0335103				0.27252		0.0485898	0.0042253	0.0190134	0.0063379	0.0126757	0.0335103	0.0295765	0.0485898	0.0929534
	0.502785				0.0335103		0.0042253	0.0063379	0.0042253	0.0147883	0.0042253	0.0042253	0.0335103	0.0063379	0.661215
	0.0335103				0.0335103		0.14788	0.0335103	0.0042253	0.0335103	0.0232386	0.0063379	0.202806	0.0126757	0.0042253
	0.0147883				0.0063379		0.14788	0.0335103	0.0042253	0.0335103	0.0335103	0.0335103	0.111967	0.0169009	0.0042253
	0.0335103				0.0169009		0.0147883	0.0063379	0.0042253	0.0335103	0.0042253	0.0147883	0.0464771	0.0359142	0.0335103
	0.0335103				0.0335103		0.149993	0.0335103	0.0063379	0.0335103	0.0042253	0.0042253	0.0126757	0.403497	0.0211261
	0.177455				0.0147883		0.0063379	0.0335103	0.0335103	0.0105631	0.0063379	0.0335103	0.177455	0.0042253	0.0063379
	0.130979				0.0084505		0.0697152	0.0042253	0.0335103	0.0147883	0.0063379	0.0335103	0.0335103	0.101404	0.0169009
	0.0335103				0.0992913		0.0335103	0.0126757	0.0211261	0.0335103	0.0335103	0.0335103	0.426734	0.0335103	0.0335103
	0.0126757				0.0335103		0.0169009	0.0335103	0.169005	0.042252	0.0335103	0.0335103	0.13098	0.0335103	0.0335103
	0.0422517				0.0042253		0.101404	0.0335103	0.0253514	0.0042253	0.0042253	0.0335103	0.0570397	0.0084505	0.0335103
	0.0338017				0.13098		0.0190134	0.0676026	0.0126757		0.0335103	0.0335103	0.15633	0.0042253	0.0338017
	0.0147883				0.0697152		0.0169009	0.0042253	0.0126757		0.0335103	0.0335103	0.0359142	0.0335103	0.0335103
	0.103516				0.0063379		0.0063379	0.0063379	0.0485898		0.0335103	0.0042253	0.0042253	0.0335103	0.0335103
	0.0401393				0.141542		0.0335103	0.0105631	0.0335103		0.0063379	0.0335103	0.137317	0.0232386	0.0335103
	0.0335103				0.0335103		0.0084505	0.0335103	0.0063379		0.0335103	0.0335103	0.0126757	0.0335103	0.0042253
	1.08796				0.0084505		0.0335103	0.0335103	0.0335103		0.0335103	0.0042253	0.0887282	0.0335103	0.316883
	0.0335103				0.0042253		0.240832	0.0335103	0.0335103		0.0042253	0.0084505	0.0359142	0.0335103	0.0380269
	0.0126757				0.219706		0.0335103	0.0335103	0.0335103		0.0335103	0.0335103	0.333783	0.0335103	0.261957
	0.0335103				0.0084505		0.0084505	0.0042253	0.0335103		0.0232386	0.0147883	0.0232386	0.0063379	0.042252
	0.270407				0.0335103		0.0063379	0.0042253	0.0335103		0.0335103	0.0126757	0.0169009	0.0042253	0.0591524
	0.031689				0.0190134		0.0063379	0.0676026	0.0042253		0.0063379	0.0335103	0.0042253	0.0042253	0.0335103
	0.0335103				0.0232386		0.0335103	0.0464771	0.0335103		0.0335103	0.0335103	0.0335103	0.0042253	0.16478
	0.111967				0.0042253		0.0335103	0.0063379	0.0335103		0.0084505	0.0335103	0.0335103	0.0335103	0.031689
	0.0335103				0.361247		0.0190134	0.0335103	0.0042253		0.0335103	0.0335103	0.0063379	0.0147883	0.0042253
	0.0335103				0.0335103		0.0042253	0.0335103	0.0190134		0.0335103	0.0335103	0.0464771	0.0042253	0.0335103
	0.0570397				0.0126757		0.219706	0.0335103	0.0084505		0.0084505	0.0042253	0.0335103	0.0335103	0.308433
	0.0335103				0.0335103		0.0126757	0.0335103	0.0126757		0.0335103	0.0274639	0.209143	0.359134	0.0084505
	0.0042253				0.0063379		0.0042253	0.0760529	0.0335103		0.0042253	0.0335103	0.0042253	0.0335103	0.031689
	0.0335103				0.538695		0.0335103	0.0084505	0.0063379		0.0084505	0.0063379	0.0335103	0.0335103	0.395046
	0.221819				0.0169009		0.0042253	0.0335103	0.0063379		0.0335103	0.0042253	0.0042253	0.0401393	0.0042253
	0.0335103				0.0105631		0.0084505	0.0335103	0.0042253		0.0063379	0.0063379	0.0126757	0.0335103	0.0335103
	0.0335103				0.0866157		0.0335103	0.0335103	0.0335103		0.0042253	0.0335103	0.0147883	0.0335103	0.198581
	0.0190134				0.0335103		0.0274639	0.0335103	0.137317		0.0359142	0.0042253	0.0042253	0.0063379	0.642204
	0.0253512				0.0042253		0.0335103	0.0335103	0.0570397		0.0335103	0.0335103	0.128867	0.116192	0.0654902
	0.0335103				0.0042253		0.0335103	0.0042253	0.289421		0.0042253	0.0084505	0.0549274	0.179568	0.183793
	0.0042253				0.0335103		0.0335103	0.0335103	0.0443645		0.0042253	0.0105631	0.042252	0.439409	0.0105631
	0.648542				0.0042253		0.0335103	0.0042253	0.268294		0.0335103	0.0253514	0.0802782	0.0042253	0.0335103
	0.0335103				0.238719		0.0105631	0.0335103	0.0528147		0.0169009	0.0335103	0.0335103	0.0190134	0.0335103
	0.0042253				0.0211261		0.0866157	0.0335103	0.109854		0.0295765	0.0335103	0.0335103	0.109854	0.0274639
	0.0335103				0.0697152		0.0295765	0.0042253	0.0335103		0.0232386	0.0591524	0.0147883	0.0335103	0.234494
	0.0335103				0.0211261		0.0338017	0.0992913	0.0335103		0.0335103	0.0739403	0.0335103	0.0335103	0.0338017
	0.0147883				0.0042253		0.242945		0.0126757		0.0084505	0.0211261	0.0335103	0.0042253	0.095066
	0.420397				0.787985		0.135205		0.0063379		0.042252	0.0126757	0.0335103	0.0084505	0.0063379
	0.24717				0.0042253		0.0063379		0.0211261		0.0253514	0.0335103	0.0335103	0.0335103	0.209143
	0.0380269				0.0335103		0.188018		0.114079		0.061265	0.0084505	0.0063379	0.0335103	0.0169009
	0.0802782				0.0042253		0.103516		0.0042253		0.0335103	0.0063379	0.0105631	0.0335103	0.555598
	0.0063379				0.061265		0.0042253		0.0126757		0.0042253	0.0063379	0.0335103	0.0335103	0.0335103
	0.107741				0.0335103		0.228156		0.0718279		0.0335103	0.0485898	0.122529	0.0443645	0.0401393
	0.30632				0.242945		0.213369		0.268294		0.0253514	0.0335103	0.0063379	0.0335103	0.0718279
	0.0063379				0.0042253		0.0335103		0.0335103		0.0335103	0.0335103	0.0335103	0.0042253	0.116192
	0.0126757				0.0335103		0.0335103		0.0211261		0.0063379	0.0335103	0.0211261	0.0335103	0.145767
	0.0464771				0.116192		0.0335103		0.152105		0.0105631	0.0654902	0.0084505	0.0147883	0.0105631
	0.0335103				0.118304		0.0042253		0.118304		0.0335103	0.0335103	0.0042253	0.0063379	0.0401393
	0.0295765				0.0190134		0.0042253		0.0335103		0.0335103	0.0335103	0.0335103	0.0042253	0.0190134
	0.519686				0.0335103		0.0443645		0.0126757		0.0335103	0.0084505	0.0335103	0.0335103	0.215481
	0.0443645				0.422509		0.0042253		0.0084505		0.0335103	0.0063379	0.0335103	0.0335103	0.0335103
	0.0335103				0.0063379		0.0335103		0.0464771		0.0507022	0.0084505	0.0295765	0.0335103	0.276745
	0.0335103				0.0335103		0.0105631		0.0169009		0.0335103	0.0887282	0.0084505	0.0084505	0.0887282
	0.0335103				0.0042253		0.0063379		0.0042253		0.0126757	0.0380269	0.0335103	0.084503	0.466872
	0.0335103				0.0211261		0.103516		0.095066		0.0335103	0.0335103	0.0335103	0.154217	0.916842
	0.137317				0.0335103		0.0190134		0.0335103		0.0335103	0.0335103	0.0335103	0.0211261	0.555598
	0.0335103				0.0335103		0.0042253		0.0335103		0.278858	0.0335103	0.0335103	0.0464771	0.215481
	0.0042253				0.0335103		0.0232386		0.0042253		0.0335103	0.0126757	0.0042253	0.0063379	0.923178
	0.0335103				0.0190134		0.245057		0.0335103		0.0042253	0.0042253	0.0042253	0.0335103	1.3668
	0.0335103				0.325333		0.0084505		0.0549274		0.0042253	0.0335103	0.0147883	0.0126757	0.885152
	0.0335103				0.0042253		0.0335103		0.0105631		0.0335103	0.0335103	0.0380269	0.458422	0.0063379
	0.344345				0.031689		0.0190134		0.0380269		0.0335103	0.0042253	0.0335103	0.103516	0.0063379
	0.0335103				0.0084505		0.0084505		0.0126757		0.0042253	0.0335103	0.0335103	0.0507022	0.0147883
	0.0335103				0.0335103		0.0335103		0.0063379		0.0063379	0.0335103	0.0335103	0.316883	0.126754
	0.344345				0.0335103		0.0335103		0.0443645		0.0042253	0.0633778	0.0335103	0.0063379	0.238719
	0.141542				0.0042253		0.0335103		0.0335103		0.0335103	0.0126757	0.0169009	0.0380269	0.0335103
	0.0335103				0.0335103		0.0335103		0.0169009		0.0169009	0.0335103	0.0335103	0.475322	0.0549274
	0.0335103				0.0335103		0.0335103		0.329558		0.0063379	0.0126757	0.0335103	0.707703	0.0971787
	0.0359142				0.0866157		0.0126757		0.0169009		0.0274639	0.0042253	0.0335103	0.0718279	0.0335103
	0.0380269				0.720375		0.0063379		0.0190134		0.0042253	0.0063379	0.0335103	0.0654902	0.532365
	0.0335103				0.0147883		0.0063379		0.420397		0.0335103	0.0335103	0.0042253	0.0823906	0.0169009
	1.58226				0.0169009		0.0084505		0.0063379		0.0042253	0.061265	0.0253514	0.031689	0.369696
	0.0335103				0.0063379		0.0335103		0.0335103		0.0211261	0.0063379	0.0169009	0.0063379	0.114079
	0.0335103				0.0084505		0.0063379		0.0335103		0.0633778	0.0042253	0.124642	0.0335103	0.0084505
	0.0126757				0.0211261		0.0105631		0.0147883		0.0335103	0.0335103	0.0042253	0.0063379	0.0169009
	0.0063379				0.0591524		0.0105631		0.0570397		0.0335103	0.0084505	0.0335103	0.0335103	0.350683
	0.0105631				0.0335103		0.568276		0.285195		0.0063379	0.0335103	0.0042253	0.0866157	0.242945
	0.585179				0.0335103		0.0063379		0.0464771		0.0760529	0.0042253	0.0335103	0.0105631	0.154217
	0.0190134				0.0464771		0.0042253		0.0105631		0.0335103	0.0335103	0.0084505	0.116192	0.105629
	0.367584				0.0335103		0.0042253		0.0169009		0.0335103	0.0084505	0.0335103	0.0105631	0.487998
	0.0401393				0.0042253		0.0084505		0.0335103		0.031689	0.0147883	0.0335103	0.0781655	1.18512
	0.0335103				0.0401393		0.0359142		0.0335103		0.0887282	0.0380269	0.0335103	0.0823906	0.0401393
	0.0042253				0.50701		0.0485898		0.41406		0.0042253	0.133092	0.0042253	0.0338017	0.0335103
	0.295757				0.0335103		0.0253514		0.0042253		0.0063379	0.0485898	0.0042253	0.0549274	0.0042253
	0.965415				0.107741		0.0084505		0.202806		0.0105631	0.0335103	0.0147883	0.299982	0.0147883
	0.0084505				0.0042253		0.103516		0.0335103		0.0042253	0.031689	0.0335103	0.306321	0.0232386
	0.0335103				0.0063379		0.0992913		0.0084505		0.0084505	0.242945	0.0335103	0.179568	0.0063379
	0.0105631				0.0335103		0.0126757		0.0335103		0.0042253	0.0507022	0.0084505	0.302095	0.0084505
	0.0549274				0.0063379		0.0042253		0.0335103		0.0335103	0.0105631	0.0042253	0.061265	0.0335103
	0.0464771				0.0042253		0.0335103		0.0335103		0.0084505	0.0929534	0.0042253	0.0802782	0.0335103
	0.0422517				0.471097		0.0335103		0.0335103		0.0335103	0.118304	0.0042253	0.800656	0.0169009
	0.0169009				0.0335103		0.0042253		0.0335103		0.0063379	0.0042253	0.0335103	0.270407	0.0042253
	0.0335103				0.0147883		0.0126757		0.0063379		0.0335103	0.0335103	0.0042253	0.435184	0.0464771
	0.0335103				0.0335103		0.116192		0.0063379		0.0380269	0.0084505	0.0042253	0.0781655	0.0126757
	0.0335103				0.0084505		0.0718279		0.0042253		0.0335103	0.0232386	0.0063379	0.0335103	0.0211261
	0.15633				0.0105631		0.0042253		0.0335103		0.0042253	0.0338017	0.0335103	0.0335103	0.042252
	0.0335103				0.0063379		0.0295765		0.0335103		0.0105631	0.0042253	0.221819	0.0549274	0.0335103
	0.0335103				0.0335103		0.0169009		0.0042253		0.190131	0.0084505	0.196468	0.0211261	0.0084505
	0.154217				0.0335103		0.236606		0.0335103		0.0126757	0.0084505	0.0126757	0.128867	0.0042253
	0.0335103				0.0335103		0.16478		0.0042253		0.0507022	0.0335103	0.042252	0.031689	0.0190134
	0.276744				0.0335103		0.295758		0.0042253		0.0274639	0.0335103	0.0676026	0.259844	0.0335103
	0.0084505				0.158443		0.0042253		0.0335103		0.0802782	0.0063379	0.0335103	0.084503	0.095066
	0.120417				0.0253514		0.0126757		0.0335103		0.274632	0.0042253	0.0335103	0.190131	0.0633778
	0.420397				0.0335103		0.0042253		0.0335103		0.221819	0.0335103	0.0042253	0.0105631	0.0992913
	0.0335103				0.0335103		0.0042253		0.0335103		0.318996	0.0335103	0.0126757	0.0676026	0.101404
	0.646443				0.0335103		0.0063379		0.0335103		0.764742	0.0105631	0.0335103	0.0335103	0.0335103
	0.0401393				0.0335103		0.0063379		0.0335103		0.0169009	0.0528147	0.0335103	0.0042253	0.0063379
	0.0401393				0.0063379		0.0232386		0.0232386		0.0042253	0.0335103	0.0335103	0.411946	0.0105631
	0.0338017				0.0335103		0.0335103		0.0084505		0.0464771	0.0063379	0.0105631	0.0042253	0.0274639
	0.0335103				0.0042253		0.0335103		0.0042253		0.0464771	0.118304	0.0335103	0.0971787	0.192244
	0.0063379				0.0335103		0.338008		0.0335103		0.0335103	0.0126757	0.0887282	0.169005	0.090841
	0.0190134				0.0335103		0.0063379		0.0335103		0.169005	0.0549274	0.0253514	0.0042253	0.0591524
	0.0335103				0.0335103		0.0084505		0.0335103		0.0042253	0.14788	0.0335103	0.0042253	0.0335103
	0.0335103				0.0042253		0.0042253		0.0335103		0.0335103	0.0253514	0.0063379	0.090841	0.0485898
	0.0335103				0.0084505		0.0190134		0.0042253		0.0335103	0.310545	0.0274639	0.0126757	0.0295765
	0.0335103				0.0335103		0.0105631		0.0335103		0.0211261	0.0335103	0.0335103	0.0549274	0.0042253
	0.0042253				0.0335103		0.0211261		0.0335103		0.0042253	0.380258	0.0335103	0.24717	0.0126757
	0.93374				0.0335103		0.0338017		0.0042253		0.0126757	0.0274639	0.0042253	0.0042253	0.0335103
	0.0335103				0.0105631		0.031689		0.0084505		0.0042253	0.031689	0.0760529	0.0190134	0.0105631
	0.0528147				0.0063379		0.0063379		0.0676026		0.0042253	0.0042253	0.0335103	0.0570397	0.234494
	0.0781655				0.0126757		0.0063379		0.0253514		0.0887282	0.0676026	0.0335103	0.0718279	0.304207
	0.0335103				0.0063379		0.0335103		0.0105631		0.0335103	0.13098	0.154217	0.29787	0.0380269
	0.0464771				0.0190134		0.0335103		0.209143		0.0084505	0.188018	0.0147883	0.257732	0.095066
	0.18168				0.0211261		0.0335103		0.031689		0.0335103	0.0084505	0.0042253	0.0211261	0.0335103
	0.0654902				0.0274639		0.0528147		0.0335103		0.0147883	0.090841	0.0335103	0.0105631	0.084503
	0.0335103				0.0335103		0.0335103		0.0359142		0.0335103	0.0887282	0.0105631	0.299982	0.0802782
	0.0335103				0.447859		0.0105631		0.16478		0.0084505	0.0295765	0.0042253	0.0335103	0.0253514
	0.0042253				0.0169009		0.0063379		0.169005		0.0211261	0.105629	0.0042253	0.095066	0.0335103
	0.095066				0.0147883		0.0042253		0.0190134		0.0147883	0.14788	0.0335103	0.0147883	0.105629
	0.0335103				0.0063379		0.0042253		0.321108		0.0295765	0.0335103	0.0295765	0.274632	0.0335103
	0.0274639				0.0570397		0.145767		0.0169009		0.0335103	0.0401393	0.0084505	0.0253514	0.0591524
	0.0676026				0.211256		0.238719		0.122529		0.0335103	0.196468	0.0464771	0.0084505	0.169005
	0.160555				0.0042253		0.0105631		0.0335103		0.196468	0.342233	0.143654	0.0335103	0.0335103
	0.0335103				0.0295765		0.0084505		0.0042253		0.124642	0.0126757	0.0335103	0.0335103	0.25562
	0.0147883				0.0042253		0.198581		0.923178		0.0335103	0.175343	0.0697152	0.0335103	0.0823906
	0.0359142				0.0126757		0.232381		0.0126757		0.0359142	0.0274639	0.0042253	0.0335103	0.141542
	0.0042253				0.109854		0.0105631		0.137317		0.0105631	0.16478	0.152105	0.411946	0.0401393
	0.143654				0.0042253		0.0042253		0.0335103		0.0739403	0.0338017	0.0042253	0.0147883	0.0063379
	0.357021				0.0042253		0.209143		0.0084505		0.0084505	0.084503	0.0063379	0.0739403	0.0063379
	0.169005				0.0042253		0.0335103		0.198581		0.0295765	0.0105631	0.0335103	0.124642	0.223931
	0.18168				0.0549274		0.0084505		0.0105631		0.0063379	0.0335103	0.0105631	0.0295765	0.390821
	0.344345				0.0485898		0.53448		0.0335103		0.0190134	0.0274639	0.0063379	0.143654	0.135205
	0.0802782				0.149993		0.346458		0.204918		0.0105631	0.200693	0.0274639	0.0084505	0.526021
	0.0084505				0.0042253		0.0232386		0.0190134		0.0335103	0.0063379	0.0042253	0.0063379	1.0288
	0.0335103				0.0591524		0.0042253		0.0084505		0.0147883	0.0335103	0.0253514	0.0063379	0.0359142
	0.0570397				0.0335103		0.0105631		0.0335103		0.0274639	0.0335103	0.095066	0.0105631	0.380258
	0.0335103				0.0335103		0.0063379		0.103516		0.0401393	0.0401393	0.0063379	0.0105631	0.0147883
	0.0063379				0.0169009		0.0147883		0.0335103		0.158443	0.0335103	0.0042253	0.0443645	0.0866157
	0.0190134				0.0084505		0.0042253		0.0063379		0.0380269	0.0042253	0.031689	0.703468	0.13098
	0.0380269				0.0084505		0.0335103		0.0335103		0.0232386	0.0335103	0.0232386	0.0335103	0.238719
	0.0147883				0.0274639		0.0443645		0.0063379		0.221819	0.0084505	0.242945	0.0211261	0.0335103
	0.0169009				0.340121		0.202806		0.0105631		0.0549274	0.0126757	0.0190134	0.0063379	0.521797
	0.0528147				0.0084505		0.316883		0.0063379		1.14499	0.342233	0.0380269	0.0232386	0.0105631
	0.0063379				0.0042253		0.0443645		0.0042253		0.0042253	0.0295765	0.0063379	0.0335103	0.228156
	0.0147883				0.382371		0.0335103		0.0042253		0.0335103	0.109854	0.0335103	0.0042253	0.0063379
	0.0084505				0.0063379		0.0169009		0.0042253		0.0676026	0.0063379	0.0147883	0.0042253	0.0042253
	0.0169009				0.576728		0.103516		0.0335103		0.0063379	0.0042253	0.0042253	0.0335103	0.299982
	0.0633774				0.0335103		0.0105631		0.133092		0.0359142	0.0042253	0.0335103	0.0335103	0.333783
	0.0507022				0.0042253		0.116192		0.0253514		0.0063379	0.0126757	0.0335103	0.0335103	0.94429
	0.17323				0.236606		0.0335103		0.0042253		0.0084505	0.0211261	0.0084505	0.0084505	0.124642
	0.0739403				0.0335103		0.0063379		0.0633778		0.0042253	0.0335103	0.0169009	0.0084505	0.0232386
	0.0335103				0.0335103		0.0042253		0.0335103		0.0084505	0.245057	0.0335103	0.0335103	0.0335103
	0.0063379				0.143654		0.0335103		0.0866157		0.0042253	0.0084505	0.0335103	0.0042253	0.135205
	0.0084505				0.0335103		0.0335103		0.0760529		0.0335103	0.213369	0.031689	0.0335103	0.435184
	0.0042253				0.0335103		0.0335103		0.0335103		0.0335103	0.0063379	0.0042253	0.0335103	0.0335103
	0.0211261				0.0335103		0.0335103		0.0105631		0.0042253	0.0335103	0.0211261	0.0042253	0.0335103
	0.175343				0.0887282		0.0335103		0.0042253		0.0760529	0.0084505	0.0335103	0.0380269	0.0274639
	0.0042253				0.0042253		0.219706		0.0084505		0.0042253	0.0335103	0.0802782	0.0105631	0.0274639
	0.0232386				0.0507022		0.0335103		0.0760529		0.116192	0.0335103	0.532365	0.0335103	0.114079
	0.0105631				0.0335103		0.0105631		0.0211261		0.0190134	0.0274639	0.223931	0.0335103	0.0676026
	0.0105631				0.0042253		0.0042253		0.0464771		0.0335103	0.0335103	0.0335103	0.0063379	0.0084505
	0.0042253				0.0042253		0.367584		0.0147883		0.0063379	0.0335103	0.0295765	0.031689	0.042252
	0.0253512				0.0147883		0.0739403		0.0084505		0.211256	0.095066	0.0084505	0.0147883	0.0335103
	0.0335103				0.0335103		0.0042253		0.0443645		0.0359142	0.0335103	0.31477	0.095066	0.0866157
	0.0335103				0.0042253		0.0063379		0.0335103		0.0760529	0.090841	0.0063379	0.162668	0.0335103
	0.0866157				0.0042253		0.0335103		0.0042253		0.333783	0.0042253	0.0042253	0.0105631	0.0147883
	0.0654902				0.0105631		0.0739403		0.0042253		0.0211261	0.576728	0.0335103	0.0042253	0.0335103
	0.0335103				0.445746		0.0063379		0.0992913		0.0335103	0.0338017	0.0042253	0.0335103	0.0380269
	0.0929534				0.0335103		0.0335103		0.0232386		0.143654	0.0335103	0.0401393	0.0042253	0.0335103
	0.0169009				0.0042253		0.0063379		0.0274639		0.0232386	0.0507022	0.388709	0.0042253	0.0105631
	0.0253512				0.0042253		0.0042253		0.0335103		0.0232386	0.0335103	0.0105631	0.0253514	0.0570397
	0.34857				0.0335103		0.0126757		0.0084505		0.0633778	0.0042253	0.0718279	0.0084505	0.0169009
	0.0147883				0.0042253		0.0063379		0.0042253		0.0335103	0.0335103	0.0570397	0.0335103	0.0147883
	0.0084505				0.154217		0.0042253		0.0105631		0.0042253	0.0335103	0.0084505	0.0211261	0.143654
	0.0335103				0.0042253		0.0335103		0.200693		0.0335103	0.0274639	0.158443	0.0335103	0.0549274
	0.0042253				0.0042253		0.0084505		1.03515		0.0335103	0.0335103	0.177455	0.0042253	0.0464771
	0.0335103				0.0338017		0.0335103		0.0866157		0.061265	0.0042253	0.0335103	0.0169009	0.120417
	0.116192				0.0042253		0.0335103		0.0063379		0.0338017	0.0464771	0.0105631	0.232381	0.0274639
	0.0042253				0.0126757		0.0335103		0.0042253		0.0042253	0.061265	0.397159	0.0084505	0.0042253
	0.122529				0.0335103		0.0042253		0.137317		0.0169009	0.0570397	0.232381	0.0507022	0.0169009
	0.107741				0.0084505		0.0042253		0.0063379		0.0147883	0.090841	0.0335103	0.0335103	0.0335103
	0.749956				0.0359142		0.0063379		0.0485898		0.0295765	0.0335103	0.118304	0.0335103	0.0335103
	0.0042253				0.0105631		0.0335103		0.0335103		0.0105631	0.0232386	0.190131	0.126754	0.0274639
	0.0335103				0.0591524		0.0335103		0.114079		0.0042253	0.0063379	0.0190134	0.0232386	0.0335103
	0.0335103				0.0211261		0.0335103		0.0359142		0.0084505	0.0169009	0.0042253	0.0591524	0.0335103
	0.0147883				0.0042253		0.0063379		0.0335103		0.133092	0.0549274	0.726709	0.0232386	0.0335103
	0.0335103				0.0105631		0.0042253		0.149993		0.0105631	0.0274639	0.122529	0.0211261	0.0084505
	0.0781655				0.0147883		0.0401393		0.0697152		0.0335103	0.0464771	0.13098	0.0126757	0.0359142
	0.0335103				0.101404		0.0507022		0.0295765		0.162668	0.0042253	0.061265	0.0126757	0.139429
	0.0335103				0.0335103		0.14788		0.0169009		0.0063379	0.0126757	0.0190134	0.0084505	0.0232386
	0.0335103				0.0335103		0.0063379		0.0335103		0.0084505	0.0335103	0.0335103	0.0084505	0.0169009
	0.0335103				0.352795		0.0335103		0.0507022		0.0528147	0.0042253	0.0335103	0.116192	0.0063379
	0.031689				0.0335103		0.0464771		0.0042253		0.0335103	0.0335103	0.0042253	0.0380269	0.0443645
	0.0335103				0.14788		0.0105631		0.0359142		0.122529	0.0335103	0.0042253	0.0105631	0.200693
	0.0335103				0.031689		0.0126757		0.0063379		0.204918	0.0063379	0.0335103	0.0042253	0.0528147
	0.0335103				0.0335103		0.0042253		0.0335103		0.0063379	0.0042253	0.0042253	0.0335103	0.526021
	0.0335103				0.308433		0.0335103		0.0063379		0.0042253	0.0042253	0.0084505	0.0697152	0.242945
	0.0042253				0.0335103		0.0211261		0.13098		0.0335103	0.0335103	0.0084505	0.0126757	0.388709
	0.0042253				0.0105631		0.0335103		0.359134		0.0335103	0.0335103	0.0211261	0.0042253	0.280969
	0.0335103				0.0126757		0.0063379		0.116192		0.0335103	0.0335103	0.0274639	0.0063379	0.327445
	0.418284				0.29787		0.0105631		0.0042253		0.0335103	0.0335103	0.0126757	0.0335103	0.0401393
	0.0781655				0.0042253		0.0335103		0.0274639		0.0063379	0.304207	0.0380269	0.0443645	0.0042253
	0.0335103				0.0084505		0.0105631		0.0335103		0.0335103	0.0063379	0.0084505	0.0335103	0.0147883
	0.0335103				0.0126757		0.128867		0.0063379		0.0335103	0.0443645	0.0042253	0.109854	0.0147883
	0.0718279				0.0335103		0.0335103		0.0126757		0.0042253	0.154217	0.0760529	0.0169009	0.0084505
	0.0335103				0.0335103		0.0063379		0.0335103		0.0335103	0.0147883	0.348571	0.363359	0.0335103
	0.0633774				0.0335103		0.0084505		0.0063379		0.0042253	0.0335103	1.10697	0.0042253	0.420397
	0.116192				0.0335103		0.0063379		0.0335103		0.0084505	0.0042253	0.0760529	0.0126757	0.0042253
	0.0063379				0.0335103		0.0063379		0.0335103		0.133092	0.0335103	0.268294	0.0335103	0.133092
	0.0211261				0.0335103		0.0335103		0.226044		0.0718279	0.0169009	0.0232386	0.0866157	0.0359142
	0.0335103				0.0042253		0.0335103		0.0105631		0.152105	0.0042253	0.114079	0.0105631	0.0335103
	0.0335103				0.15633		0.0335103		0.0105631		0.190131	0.0335103	0.578842	0.090841	0.0443645
	0.061265				0.0335103		0.0335103		0.0549274		0.0126757	0.0380269	0.0063379	0.0335103	0.0232386
	0.0335103				0.0126757		0.0105631		0.0295765		0.179568	0.0823906	0.397159	0.061265	0.0211261
	0.0335103				0.0335103		0.0549274		0.122529		0.0335103	0.128867	0.0401393	0.0084505	0.0359142
	0.0042253				0.0335103		0.0126757		0.0063379		0.0105631	0.232381	0.0232386	0.0335103	0.0105631
	0.0063379				0.0147883		0.0042253		0.0042253		0.0253514	0.14788	0.0359142	0.0063379	0.0042253
	0.0335103				0.0335103		0.0335103		0.0042253		0.0190134	0.084503	0.0335103	0.0654902	0.0359142
	0.0335103				0.0063379		0.0042253		0.0105631		0.0335103	0.0253514	0.0042253	0.0295765	0.0335103
	0.0335103				0.0063379		0.0063379		0.219706		0.0190134	0.0335103	0.0335103	0.0063379	0.475322
	0.0042253				0.0084505		0.0042253		0.0335103		0.0335103	0.0084505	0.0697152	0.0126757	0.0335103
	0.0335103				0.0335103		0.0063379		0.0335103		0.0335103	0.0781655	0.238719	0.0443645	0.0335103
	0.0335103				0.0335103		0.0042253		0.0335103		0.0335103	0.0084505	0.443635	0.0718279	0.0335103
	0.0042253				0.0063379		0.0335103		0.0042253		0.0042253	0.25562	0.0464771	0.295758	0.0042253
	0.0422517						0.0335103		0.0147883		0.0335103	0.0042253	0.0063379	0.0169009	0.0335103
	0.0591524						0.0211261		0.0063379		0.188018	0.0866157	0.346458	0.221819	0.0507022
	0.0335103						0.0063379		0.0443645		0.0274639	0.0274639	0.540811	0.0042253	0.154217
	0.0823906						0.0464771		0.0042253		0.0042253	0.0084505	1.20626	0.0063379	0.192244
	0.0335103						0.0335103		0.0335103		0.0042253	0.0335103	0.0232386	0.0063379	0.0042253
	0.0335103						0.0084505		0.0335103		0.0042253	0.0335103	0.120417	0.0232386	0.101404
	0.084503						0.0105631		0.0084505		0.0126757	0.0335103	0.0760529	0.042252	0.0042253
	0.141542						0.0211261		0.0105631		0.0443645	0.0335103	0.0190134	0.0063379	0.0042253
	0.031689						0.0063379		0.0042253		0.0866157	0.0042253	0.0335103	0.0335103	0.0042253
	0.0335103						0.0528147		0.0718279		0.0063379	0.0335103	0.042252	0.0335103	0.0335103
	0.0126757						0.0126757		0.0335103		0.0042253	0.0335103	0.0274639	0.0359142	0.0335103
	0.0335103						0.0211261		0.236606		0.0335103	0.0042253	0.0063379	0.061265	0.0190134
	0.0338017						0.0042253		0.109854		0.0739403	0.0232386	0.0380269	0.0084505	0.160555
	0.133092						0.0084505		0.0359142		0.0335103	0.0042253	0.27252	0.0042253	0.40561
	0.0190134						0.0335103		0.128867		0.061265	0.0042253	0.0063379	0.0335103	0.327445
	0.0335103						0.0169009		0.0295765		0.0042253	0.177455	0.0338017	0.0335103	0.661215
	0.0169009						0.0929534		0.0335103		0.0443645	0.386597	0.0335103	0.0335103	0.283083
	0.0335103						0.0335103		0.0335103		0.0063379	0.0063379	0.0335103	0.0335103	0.342233
	0.0335103						0.0338017		0.0335103		0.0232386	0.0676026	0.095066	0.0063379	0.0253514
	0.0929534						0.0169009		0.0042253		0.0232386	0.0126757	0.213369	0.0335103	0.175343
	0.031689						0.0335103		0.0335103		0.0063379	0.0335103	0.289421	0.0169009	0.0335103
	0.0335103						0.0190134		0.0335103		0.245057	0.107741	0.0042253	0.0084505	0.0063379
	0.0147883						0.0042253		0.0169009		0.133092	0.0335103	0.0335103	0.0335103	0.390821
	0.0335103						0.0335103		0.0464771		0.0042253	0.118304	0.0676026	0.0335103	0.0042253
	0.0063379						0.084503		0.0232386		0.0464771	0.0633778	0.0570397	0.0105631	0.0335103
	0.0335103						0.0042253		0.0063379		0.0380269	0.0507022	0.456309	0.0042253	0.0042253
	0.0335103						0.0042253		0.0335103		0.141542	0.0042253	0.0126757	0.0042253	0.0063379
	0.0084505						0.0042253		0.0147883		0.0126757	0.0549274	0.0633778	0.0335103	0.0718279
	0.0697152						0.114079		0.0380269		0.0232386	0.0105631	0.0042253	0.0335103	0.0335103
	0.0335103						0.0042253		0.0274639		0.240832	0.0335103	0.0105631	0.0335103	0.031689
	0.0335103						0.0063379		0.0063379		0.061265	0.0042253	0.0335103	0.0335103	0.0084505
	0.137317						0.0084505		0.0335103		0.0739403	0.0335103	0.0063379	0.0063379	0.0042253
	0.0042253						0.0063379		0.0335103		0.0042253	0.0042253	0.0169009	0.0211261	0.0335103
	0.0654902						0.0359142		0.0335103		0.0084505	0.0335103	0.0335103	0.0676026	0.0042253
	0.0335103						0.0335103		0.0335103		0.445746	0.0380269	0.141542	0.0232386	0.428847
	0.0335103						0.0084505		0.0335103		0.0591524	0.0169009	0.0084505	0.0126757	0.0169009
	0.0335103						0.0126757		0.0335103		0.0042253	0.0338017	0.0190134	0.0335103	0.118304
	0.0335103						0.0739403		0.0380269		0.0335103	0.0063379	0.0401393	0.0105631	0.0211261
	0.0335103						0.0126757		0.0042253		0.0084505	0.0105631	0.0063379	0.0063379	0.0105631
	0.0485894						0.242945		0.0335103		0.0126757	0.0335103	0.454197	0.0084505	0.0105631
	0.0335103						0.0211261		0.103516		0.0718279	0.0190134	0.0335103	0.0335103	0.346458
	0.0335103						0.0042253		0.0335103		0.109854	0.0335103	0.0253514	0.0335103	0.0042253
	0.0335103						0.0335103		0.0335103		0.0335103	0.0042253	0.126754	0.0676026	0.403497
	0.0335103						0.0335103		0.0335103		0.0335103	0.0335103	0.0042253	0.0084505	0.0274639
	0.0335103						0.0042253		0.0042253		0.0335103	0.0084505	0.095066	0.0335103	0.0063379
	0.0335103						0.0169009		0.145767		0.329558	0.0335103	0.031689	0.0549274	0.0335103
	0.754175						0.0063379		0.0063379		0.120417	0.0084505	0.0147883	0.0042253	0.0147883
	0.0105631						0.0335103		0.0335103		0.120417	0.0335103	0.0335103	0.0676026	0.0042253
	0.0084505						0.0335103		0.0063379		0.0147883	0.0147883	0.0042253	0.0063379	0.0126757
	0.0335103						0.289421		0.0126757		0.103516	0.0335103	0.0335103	0.0335103	0.0042253
	0.0676026						0.0084505		0.0338017		0.095066	0.0042253	0.0063379	0.0211261	0.0401393
	0.0335103						0.0335103		0.0335103		0.443635	0.0335103	0.0042253	0.0335103	0.0147883
	0.53448						0.0380269		0.0169009		0.204918	0.0042253	0.0042253	0.133092	0.0042253
	0.0335103						0.0042253		0.0335103		0.0359142	0.0084505	0.0338017	0.0507022	0.0335103
	0.0335103						0.0105631		0.0126757		0.24717	0.0335103	0.0042253	0.0084505	0.0335103
	0.0335103						0.0147883		0.0335103		0.103516	0.0084505	0.0147883	0.0042253	0.0335103
	0.0335103						0.0335103		0.0335103		0.0485898	0.0335103	0.0335103	0.0042253	0.0335103
	0.0335103						0.0335103		0.0042253		0.185906	0.0335103	0.0042253	0.0335103	0.0335103
	0.302095						0.0335103		0.0042253		0.409835	0.0063379	0.0485898	0.0335103	0.0697152
	0.29787						0.0335103		0.0042253		0.0274639	0.0335103	0.0063379	0.0169009	0.0802782
	0.0042253						0.0105631		0.0380269		0.0335103	0.0042253	0.0105631	0.0335103	0.111967
	0.17323						0.0147883		0.27252		0.0190134	0.0335103	0.204918	0.0042253	0.209143
	0.0084505						0.0359142		0.0190134		0.183793	0.0335103	0.0335103	0.0169009	0.0126757
	0.0335103						0.0147883		0.126754		0.0802782	0.0335103	0.0042253	0.0042253	0.0335103
	0.342233						0.0335103		0.0042253		0.0169009	0.0105631	0.240832	0.0335103	0.0063379
	0.0105631						0.0042253		0.0335103		0.0126757	0.0335103	0.0042253	0.0335103	0.0335103
	0.0063379						0.0126757		0.0335103		0.0084505	0.0335103	0.0042253	0.0063379	0.128867
	0.0335103						0.0591524		0.0126757		0.0042253	0.0335103	0.0042253	0.0335103	0.409835
	0.0401393						0.0676026		0.0802782		0.120417	0.0335103	0.0335103	0.0335103	0.0335103
	0.0084505						0.0335103		0.202806		0.0887282	0.0126757	0.177455	0.0335103	0.0147883
	0.0126757						0.0591524		0.0464771		0.0042253	0.0335103	0.0335103	0.0335103	0.0105631
	0.0190134						0.0084505		0.0042253		0.0105631	0.0042253	0.0718279	0.0042253	0.0147883
	0.0335103						0.0739403		0.0338017		0.0335103	0.0335103	0.0335103	0.0126757	0.0338017
	0.0335103						0.0335103		0.0105631		0.0335103	0.0335103	0.204918	0.0335103	0.111967
	0.0105631						0.0147883		0.0335103		0.0232386	0.0042253	0.124642	0.0063379	0.0274639
	0.0401393						0.0335103		0.0042253		0.0042253	0.0042253	0.0042253	0.0042253	0.0042253
	0.137317						0.0335103		0.0084505		0.0105631	0.0335103	0.215481	0.0211261	0.139429
	0.0359142						0.0063379		0.0929534		0.107741	0.0335103	0.0105631	0.0335103	0.285195
	0.0190134						0.0335103		0.0335103		0.0335103	0.0335103	0.249282	0.128867	0.0335103
	0.0335103						0.0042253		0.0335103		0.0443645	0.0063379	0.659107	0.0211261	0.0042253
	0.0335103						0.0335103		0.0042253		0.0042253	0.0335103	0.0718279	0.0126757	0.0063379
	0.105629						0.0507022		0.0335103		0.0063379	0.0335103	0.135205	0.0335103	0.0335103
	0.149993						0.0335103		0.0335103		0.0887282	0.0929534	0.061265	0.0063379	0.0335103
	0.0169009						0.0042253		0.0335103		0.0063379	0.0335103	0.657003	0.177455	0.158443
	0.876708						0.0042253		0.0042253		0.249282	0.0401393	0.278858	0.0147883	0.0042253
	0.0335103						0.0084505		0.0335103		0.0190134	0.0295765	0.0335103	0.0335103	0.209143
	0.0105631						0.0042253		0.0335103		0.0507022	0.0887282	0.234494	0.0190134	0.0507022
	0.0042253						0.0147883		0.0063379		0.207031	0.0063379	0.0190134	0.0335103	0.185906
	0.0335103						0.0802782		0.0147883		0.0654902	0.0169009	0.192244	0.0335103	0.0274639
	0.124642						0.0084505		0.207031		0.0335103	0.0063379	0.0335103	0.0335103	0.103516
	0.200693						0.0359142		0.0335103		0.16478	0.0063379	0.0654902	0.0063379	0.0063379
	0.109854						0.0335103		0.0464771		0.0335103	0.152105	0.0335103	0.128867	0.270407
	0.0063379						0.0335103		0.0335103		0.0169009	0.0169009	0.0335103	0.0147883	0.0549274
	0.0422517						0.0063379		0.0335103		0.0739403	0.0335103	0.0335103	0.0147883	0.0126757
	0.0335103						0.0335103		0.090841		0.0823906	0.0335103	0.0335103	0.0042253	0.223931
	0.0335103						0.0063379		0.0335103		0.192244	0.215481	0.0335103	0.0335103	0.137317
	0.0335103						0.0169009		0.0084505		0.502785	0.120417	0.128867	0.0042253	0.114079
	0.0335103						0.0042253		0.0335103		0.0042253	0.143654	0.0084505	0.0084505	0.0823906
	0.0147883						0.0084505		0.0335103		0.0042253	0.0084505	0.0042253	0.0169009	0.0147883
	0.0126757						0.0042253		0.0335103		0.0335103	0.316883	0.0042253	0.0042253	0.0335103
	0.0528147						0.149993		0.0335103		0.095066	0.0335103	0.0042253	0.0042253	0.116192
	0.152105						0.0335103		0.0335103		0.0335103	0.111967	0.0335103	0.0084505	0.090841
	0.105629						0.0335103		0.0528147		0.0443645	0.0190134	0.0335103	0.0335103	0.0042253
	0.0105631						0.042252		0.0042253		0.0105631	0.0042253	0.0232386	0.0335103	0.207031
	0.145767						0.0335103		0.304207		0.0380269	0.090841	0.0380269	0.0042253	0.0591524
	0.0169009						0.0335103		0.0887282		0.0335103	0.251394	0.0507022	0.0335103	0.0042253
	0.420397						0.0063379		0.0042253		0.0335103	0.0591524	0.0253514	0.0335103	0.411946
	0.0147883						0.0042253		0.0335103		0.0633778	0.0084505	0.0335103	0.0335103	0.0063379
	0.0335103						0.0147883		0.0169009		0.0232386	0.0063379	0.0042253	0.0042253	0.031689
	0.0335103						0.0274639		0.0359142		0.0335103	0.0147883	0.0042253	0.0335103	0.0335103
	0.0253512						0.0063379		0.0335103		0.0042253	0.0866157	0.0084505	0.0042253	0.0063379
	0.0335103						0.0971787		0.0335103		0.0335103	0.0084505	0.321108	0.0335103	0.0335103
	0.0335103						0.177455		0.0866157		0.0042253	0.0105631	0.0169009	0.0335103	0.0549274
	0.0084505						0.0063379		0.0042253		0.0042253	0.0633778	0.967542	0.0063379	0.196468
	0.0126757						0.0338017		0.133092		0.0528147	0.0042253	0.0295765	0.0063379	0.0063379
	0.0335103						0.0253514		0.0190134		0.109854	0.0335103	0.274632	0.0084505	0.24717
	0.0274639						0.0169009		0.0042253		0.0042253	0.17323	0.367584	0.0042253	0.0443645
	0.0422517						0.0929534		0.0063379		0.0042253	0.0063379	0.0335103	0.0042253	0.0335103
	0.0335103						0.0359142		0.0042253		0.0335103	0.0401393	0.471097	0.0063379	0.0190134
	0.0042253						0.0042253		0.0335103		0.0169009	0.0105631	0.365471	0.0084505	0.0232386
	0.101403						0.0359142		0.042252		0.0335103	0.0147883	0.0063379	0.0335103	0.0507022
	0.0063379						0.0042253		0.0338017		0.0335103	0.0063379	0.0084505	0.0042253	0.0084505
	0.0169009						0.061265		0.0126757		0.0335103	0.0335103	0.0992913	0.0335103	0.0042253
	0.257732						0.0063379		0.0335103		0.0335103	0.0335103	0.0335103	0.0169009	0.0126757
	0.0232386						0.0718279		0.111967		0.0335103	0.0042253	0.0190134	0.0335103	0.031689
	0.084503						0.215481		0.0042253		0.0105631	0.0042253	0.0591524	0.0063379	0.0253514
	0.0338017						0.238719		0.0485898		0.0042253	0.0335103	0.0063379	0.0335103	0.0084505
	0.0147883						0.0335103		0.158443		0.0063379	0.234494	0.0335103	0.0335103	0.101404
	0.0570397						0.0126757		0.0295765		0.0232386	0.0084505	0.0063379	0.0335103	0.0126757
	0.141542						0.0335103		0.0063379		0.0042253	0.0042253	0.0781655	0.0042253	0.0335103
	0.0042253						0.0190134		0.149993		0.0211261	0.0063379	0.0042253	0.0105631	0.0335103
	0.0335103						0.0335103		0.0359142		0.0359142	0.0084505	0.0042253	0.0084505	0.0591524
	0.0335103						0.0335103		0.0105631		0.0063379	0.0190134	0.454197	0.0335103	0.0335103
	0.0190134						0.0063379		0.0335103		0.0063379	0.0335103	0.0335103	0.0042253	0.0464771
	0.0253512						0.0084505		0.0042253		0.0232386	0.0739403	0.120417	0.0063379	0.0147883
	0.0781655						0.236606		0.0232386		0.0084505	0.0335103	0.0105631	0.0335103	0.0042253
	0.0718279						0.0335103		0.0063379		0.0190134	0.0464771	0.0380269	0.0084505	0.344345
	0.14788						0.061265		0.0335103		0.0781655	0.0169009	0.0126757	0.0335103	0.0105631
	0.0718279						0.0063379		0.0084505		0.0147883	0.0063379	0.042252	0.0042253	0.31477
	0.0274639						0.190131		0.0335103		0.0335103	0.0190134	0.0335103	0.0528147	0.0676026
	0.031689						0.0042253		0.0335103		0.0335103	0.0335103	0.384484	0.0063379	0.0063379
	0.0042253						0.0042253		0.0042253		0.0335103	0.0190134	0.0042253	0.0042253	0.823895
	0.211256						0.0335103		0.0335103		0.0063379	0.0042253	0.0992913	0.0335103	0.327445
	0.118304						0.0335103		0.0042253		0.0823906	0.0105631	0.196468	0.0105631	0.120417
	0.0335103						0.0042253		0.0335103		0.0887282	0.0042253	0.0654902	0.103516	0.335896
	0.0335103						0.0335103		0.0335103		0.0126757	0.0232386	0.126754	0.0401393	0.0042253
	0.0335103						0.0042253		0.0335103		0.031689	0.0042253	0.0063379	0.0063379	0.0147883
	0.0042253						0.0335103		0.0335103		0.0823906	0.0084505	0.0992913	0.0335103	0.0042253
	0.0335103						0.0063379		0.0042253		0.0335103	0.0335103	0.0253514	0.0042253	0.0084505
	0.0335103						0.0335103		0.0335103		0.0697152	0.0335103	0.101404	0.0042253	0.0063379
	0.0335103						0.0335103		0.0042253		0.0063379	0.0084505	0.0253514	0.0335103	0.0084505
	0.0063379						0.0042253		0.0335103		0.0591524	0.0063379	0.0105631	0.0338017	0.0126757
	0.0105631						0.0335103		0.0232386		0.0335103	0.0335103	0.0169009	0.0042253	0.0335103
	0.0335103						0.0335103		0.0295765		0.0335103	0.0335103	0.122529	0.0042253	0.0781655
	0.0253512						0.0335103		0.0084505		0.0063379	0.0063379	0.0654902	0.0063379	0.0464771
	0.213368						0.0335103		0.0335103		0.0084505	0.0335103	0.177455	0.0464771	0.0338017
	0.0335103						0.0335103		0.0335103		0.0295765	0.0042253	0.386597	0.0042253	0.0063379
	0.0335103						0.0042253		0.0335103		0.0335103	0.0335103	0.0042253	0.0042253	0.0147883
	0.0335103						0.0042253		0.0549274		0.0126757	0.0335103	0.0211261	0.0335103	0.0063379
	0.211256						0.0042253		0.0147883		0.0401393	0.0147883	0.0335103	0.0335103	0.141542
	0.261957						0.0084505		0.0190134		0.0335103	0.0335103	0.466872	0.0042253	0.213369
	0.084503						0.0335103		0.0335103		0.0335103	0.0169009	0.141542	0.0042253	0.0335103
	0.0335103						0.0042253		0.0335103		0.0464771	0.0211261	0.211256	0.0042253	0.0335103
	0.0335103						0.0063379		0.0335103		0.084503	0.0335103	0.090841	0.0335103	0.538695
	0.0335103						0.0338017		0.0042253		0.0105631	0.0190134	0.0633778	0.0063379	0.0528147
	0.0335103						0.0338017		0.0063379		0.0335103	0.0063379	0.0335103	0.0042253	0.0105631
	0.0359142						0.306321		0.0359142		0.0335103	0.0335103	0.0718279	0.0042253	0.0929534
	0.845005						0.435184		0.0105631		0.0063379	0.0105631	0.0443645	0.0335103	0.0147883
	0.777409						0.0335103		0.0335103		0.0042253	0.0063379	0.0633778	0.0084505	0.0401393
	0.0042253						0.0335103		0.365471		0.0063379	0.0232386	0.407721	0.0335103	0.0335103
	0.031689						0.0676026		0.0335103		0.0335103	0.0295765	0.198581	0.0335103	0.261957
	0.141542						0.0253514		0.141542		0.0169009	0.0042253	0.0042253	0.0042253	0.0274639
	0.0126757						0.0232386		0.0042253		0.0042253	0.0063379	0.530255	0.0335103	0.0443645
	0.0802782						0.0042253		0.0126757		0.0335103	0.0718279	0.0335103	0.0335103	0.0335103
	0.0335103						0.0335103		0.0084505		0.0042253	0.0042253	0.0335103	0.0335103	0.0335103
	0.0335103						0.0335103		0.0211261		0.16478	0.0570397	0.0063379	0.0335103	0.0063379
	0.0335103						0.0169009		0.0401393		0.0042253	0.0697152	0.378147	0.0335103	0.0190134
	0.0335103						0.0063379		0.0042253		0.0335103	0.0335103	0.196468	0.0042253	0.0190134
	0.0232386						0.116192		0.0274639		0.0042253	0.0147883	0.122529	0.0335103	0.0084505
	1.38793						0.0063379		0.0274639		0.0335103	0.0781655	0.0654902	0.0335103	0.0335103
	0.0335103						0.0335103		0.0042253		0.0063379	0.0190134	0.0042253	0.0335103	0.0335103
	0.0802782						0.0380269		0.145767		0.084503	0.0335103	0.32322	0.0063379	0.0063379
	0.0335103						0.0042253		0.621094		0.0126757	0.0147883	0.0295765	0.0335103	0.230269
	0.0169009						0.0335103		0.0359142		0.0274639	0.0042253	0.0335103	0.0335103	0.0335103
	0.0042253						0.160555		0.226044		0.0232386	0.0335103	0.0760529	0.0063379	0.0338017
	0.0335103						0.0401393		0.0042253		0.0042253	0.0335103	0.395046	0.0084505	0.40561
	0.0169009						0.084503		0.0126757		0.122529	0.0042253	0.0654902	0.0335103	0.538695
	0.0335103						0.308433		0.090841		0.0401393	0.0335103	0.0042253	0.0042253	0.204918
	0.061265						0.0042253		0.0443645		0.0190134	0.0105631	0.0464771	0.0335103	0.0335103
	0.0823906						0.321108		0.0335103		0.0739403	0.0335103	0.0147883	0.0335103	0.0147883
	0.0338017						0.200693		0.0335103		0.0335103	0.0335103	0.128867	0.0063379	0.276745
	0.0335103						0.0335103		0.0084505		0.0063379	0.0335103	0.0063379	0.0335103	0.0718279
	0.0335103						0.0063379		0.0464771		0.0335103	0.0335103	0.0971787	0.0335103	0.0335103
	0.0335103						0.0169009		0.0105631		0.188018	0.0335103	0.0739403	0.0063379	0.0335103
	0.0335103						0.640101		0.0042253		0.0335103	0.0169009	0.232381	0.0126757	0.437297
	0.0654902						0.471097		0.0335103		0.0063379	0.0063379	0.261957	0.0591524	0.346458
	0.0464771						0.0084505		0.0335103		0.0335103	0.0084505	0.232381	0.0570397	0.171118
	0.0274639						0.411946		0.0335103		0.0042253	0.0042253	0.849247	0.0781655	0.0335103
	0.0335103						0.16478		0.0084505		0.0042253	0.0335103	0.0633778	0.185906	0.0570397
	0.219706						0.133092		0.0335103		0.0335103	0.0042253	0.0335103	0.042252	0.439409
	0.0274639						0.0335103		0.0528147		0.0335103	0.0042253	0.261957	0.0253514	0.460534
	0.0802782						0.530255		0.0105631		0.0335103	0.0335103	0.183793	0.0633778	0.0335103
	0.0335103						0.0335103		0.0042253		0.0335103	0.0042253	0.160555	0.0063379	0.232381
	0.468985						0.0084505		0.0335103		0.0335103	0.0359142	0.118304	0.0971787	0.0147883
	0.0335103						0.0105631		0.0633778		0.0335103	0.0335103	0.0232386	0.0335103	0.0992913
	0.0633774						0.171118		0.0084505		0.0063379	0.0042253	0.0633778	0.0169009	0.0676026
	0.0335103						0.555598		0.0335103		0.0126757	0.0335103	0.568276	0.236606	0.211256
	0.0422517						0.0105631		0.0063379		0.0063379	0.0063379	0.234494	0.0335103	0.720375
	0.532365						0.0126757		0.0042253		0.0084505	0.0335103	0.217594	0.0084505	0.031689
	0.0335103						0.291532		0.0335103		0.0042253	0.0335103	0.0380269	0.0528147	0.0335103
	0.126754						0.0084505		0.0335103		0.0335103	0.0335103	0.217594	0.0147883	0.0401393
	0.0335103						0.0335103		0.0335103		0.0105631	0.0335103	0.128867	0.0253514	0.0335103
	0.0169009						0.0335103		0.0591524		0.0335103	0.0063379	0.0084505	0.0042253	0.213369
	0.0802782						0.0380269		0.0084505		0.0335103	0.0063379	0.15633	0.0042253	0.0063379
	0.0335103						0.0335103		0.0335103		0.0042253	0.0335103	0.154217	0.0335103	0.0335103
	0.0335103						0.223931		0.0781655		0.0084505	0.0042253	0.523913	0.0084505	0.0335103
	0.0335103						0.137317		0.0147883		0.0084505	0.0169009	0.13098	0.0335103	0.0335103
	0.60207						0.0190134		0.0063379		0.0042253	0.0335103	0.111967	0.0335103	0.0063379
	0.0335103						0.0739403		0.0335103		0.0335103	0.0335103	0.386597	0.0063379	0.0335103
	0.0063379						0.0274639		0.0105631		0.0105631	0.0335103	0.0507022	0.0063379	0.0042253
	0.0042253						0.105629		0.0063379		0.0335103	0.0335103	0.0042253	0.0063379	0.0063379
	0.0887282						0.0126757		0.0042253		0.0042253	0.0190134	0.0335103	0.0335103	0.0335103
	0.0295765						0.137317		0.0126757		0.0335103	0.0063379	0.0335103	0.0335103	0.0190134
	0.0335103						0.0042253		0.0335103		0.0443645	0.0335103	0.0697152	0.0335103	0.0335103
	0.0654902						0.0084505		0.0335103		0.0335103	0.0335103	0.031689	0.0335103	0.43096
	0.0335103						0.0335103		0.0042253		0.0063379	0.0335103	0.0042253	0.0335103	0.122529
	0.0335103						0.0507022		0.0190134		0.0528147	0.0084505	0.0042253	0.0335103	0.0042253
	0.287308						0.0507022		0.0335103		0.0335103	0.0042253	0.0866157	0.0084505	0.0147883
	0.0335103						0.0464771		0.0084505		0.0084505	0.0335103	0.0063379	0.0335103	0.0338017
	0.0335103						0.0084505		0.0335103		0.145767	0.0335103	0.0063379	0.0063379	0.0760529
	0.0633774						0.0380269		0.0147883		0.0335103	0.0084505	0.0507022	0.0042253	0.0570397
	0.18168						0.0335103		0.0042253		0.0335103	0.0401393	0.0084505	0.0253514	0.139429
	0.0042253						0.0335103		0.0335103		0.0042253	0.0147883	0.0335103	0.0335103	0.29787
	0.0335103						0.0042253		0.0063379		0.0335103	0.0295765	0.0190134	0.0126757	0.190131
	0.105629						0.0042253		0.0042253		0.0190134	0.0063379	0.0335103	0.0335103	0.0042253
	0.0570397						0.0105631		0.0335103		0.0335103	0.0232386	0.0063379	0.0232386	0.0823906
	0.0335103						0.0063379		0.0335103		0.0335103	0.0335103	0.0042253	0.0147883	0.228156
	0.0295765						0.0042253		0.0335103		0.0335103	0.0147883	0.0570397	0.0063379	0.219706
	0.0335103						0.0042253		0.0335103		0.0335103	0.0042253	0.0359142	0.0335103	0.568276
	0.555598						0.0335103		0.0063379		0.0443645	0.0063379	0.095066	0.0335103	0.0063379
	0.0823906						0.118304		0.0335103		0.185906	0.0335103	0.0232386	0.0063379	0.0063379
	0.0335103						0.0063379		0.0042253		0.0335103	0.0084505	0.365471	0.0063379	0.245057
	0.0335103						0.468985		0.0042253		0.0126757	0.0335103	0.107741	0.0042253	0.519686
	0.0063379						0.0042253		0.0063379		0.0335103	0.0042253	0.0443645	0.0042253	0.0042253
							0.0084505		0.0335103		0.0232386	0.0042253	0.536585	0.0042253	0.0084505
							0.0335103		0.0042253		0.13098	0.0042253	0.0380269	0.0084505	0.0063379
							0.0335103		0.0042253		0.0335103	0.0335103	0.0335103	0.0042253	0.0169009
							0.0042253		0.13098		0.0042253	0.0335103	0.0971787	0.0335103	0.17323
							0.0335103		0.0232386		0.0335103	0.0335103	0.124642	0.51546	0.0126757
							0.0042253		0.0063379		0.0335103	0.0335103	0.0084505	0.15633	0.599969
							0.0335103		0.0335103		0.0335103	0.0042253	0.0971787	0.0105631	0.0042253
							0.0084505		0.295758		0.120417	0.0335103	0.0335103	0.0063379	0.0992913
							0.0335103		0.0335103		0.0335103	0.0335103	0.0335103	0.0190134	0.0211261
							0.0295765		0.0335103		0.0105631	0.0042253	0.175343	0.0335103	0.0084505
							0.0042253		0.0084505		0.0042253	0.0335103	0.0042253	0.0042253	0.0253514
							0.0084505		0.0042253		0.0335103	0.0335103	0.0335103	0.0335103	0.0335103
							0.114079		0.0335103		0.0335103	0.0335103	0.0570397	0.0084505	0.0042253
							0.0335103		0.0042253		0.0063379	0.0335103	0.152105	0.0042253	0.0335103
							0.109854		0.0084505		0.0169009	0.0335103	0.0253514	0.0335103	0.0042253
							0.042252		0.0335103		0.0335103	0.0335103	0.0105631	0.0335103	0.0063379
							0.137317		0.0335103		0.0335103	0.0042253	0.211256	0.0063379	0.0042253
							0.0084505		0.0253514		0.0338017	0.0063379	0.031689		0.0485898
							0.0335103		0.0335103		0.0084505	0.0042253	0.0126757		0.0042253
							0.0335103		0.0335103		0.0105631	0.0042253	0.14788		0.0335103
							0.0126757		0.0335103		0.0335103	0.0126757	0.0063379		0.0359142
							0.0335103		0.0485898		0.0359142	0.0042253	0.0084505		0.031689
							0.0464771		0.0084505		0.0443645	0.0335103	0.0528147		0.0084505
							0.0232386		0.0335103		0.0335103	0.0335103	0.0190134		0.152105
							0.0084505		0.0335103		0.0335103	0.0335103	0.0211261		0.0335103
							0.0042253		0.0063379		0.0084505	0.0063379	0.031689		0.477435
							0.223931		0.0335103		0.160555	0.0063379	0.0063379		0.171118
							0.0063379		0.0042253		0.0335103	0.0042253	0.198581		0.0335103
							0.0274639		0.0335103		0.0042253	0.0335103	0.0042253		0.511236
							0.0335103		0.0042253		0.0084505	0.0335103	0.251394		0.16478
							0.0232386		0.0042253		0.0507022	0.0335103	0.0232386		0.0042253
							0.0335103		0.0042253		0.0335103	0.0335103	0.0211261		0.287308
							0.0335103		0.0335103		0.0335103	0.0126757	0.747842		0.135205
							0.0063379		0.0084505		0.0335103	0.0042253	0.162668		0.0105631
							0.0042253		0.0335103		0.0335103	0.0335103	0.200693		0.0169009
							0.0063379		0.0042253		0.0169009	0.0335103	0.388709		0.0042253
							0.0335103		0.223931		0.0042253	0.0042253	0.0781655		0.0147883
							0.0335103		0.0464771		0.215481	0.0042253	0.0126757		0.0042253
							0.0042253		0.0147883		0.0633778	0.0335103	0.0042253		0.0042253
							0.0335103		0.0929534		0.0190134	0.0063379	0.0335103		0.0335103
							0.0042253		0.0335103		0.0084505	0.0335103	0.0335103		0.0042253
							0.0335103		0.0042253		0.0042253	0.0042253	0.0042253		0.0042253
							0.0335103		0.0485898		0.0084505	0.0042253	0.0084505		0.0105631
							0.0335103		0.0084505		0.0169009	0.0335103	0.0042253		0.705593
							0.0084505		0.0335103		0.0211261	0.0042253	0.0232386		0.141542
							0.0169009		0.0335103		0.166893	0.0042253	0.0443645		0.234494
							0.0929534		0.0335103		0.0570397	0.0335103	0.0042253		0.15633
							0.41406		0.0253514		0.0042253	0.0335103	0.0335103		0.304207
							0.0232386		0.0063379		0.0992913	0.0335103	0.0335103		0.139429
							0.0063379		0.0335103		0.0781655	0.0507022	0.0335103		0.128867
							0.0359142		0.0335103		0.0063379	0.0042253	0.0335103		0.0169009
							0.0126757		0.0335103		0.0084505	0.0507022	0.0335103		0.798532
							0.0105631		0.0084505		0.192244	0.0781655	0.0335103		0.0866157
							0.0042253		0.0042253		0.0126757	0.111967	0.0211261		0.116192
							0.0126757		0.0063379		0.0971787	0.249282	0.0697152		0.166893
							0.0147883		0.0042253		0.0232386	0.0338017	0.0063379		0.0464771
							0.0401393		0.0126757		0.0739403	0.122529	0.0063379		0.0147883
							0.0042253		0.0335103		0.202806	0.0042253	0.0063379		0.0335103
							0.0105631		0.0335103		0.0338017	0.0338017	0.0335103		0.274632
							0.0105631		0.0335103		0.0359142	0.171118	0.0126757		0.0464771
							0.0335103		0.0063379		0.283083	0.0443645	0.0190134		0.0359142
							0.0211261		0.0105631		0.0042253	0.0335103	0.0274639		0.116192
							0.0042253		0.0042253		0.0335103	0.0335103	0.137317		0.0042253
							0.0335103		0.0335103		0.0063379	0.0126757	0.211256		0.0147883
							0.0084505		0.0359142		0.0190134	0.0042253	0.0042253		0.0042253
							0.0485898		0.0335103		0.0335103	0.0335103	0.49011		0.0335103
							0.0335103		0.0335103		0.0335103	0.0335103	0.0190134		0.0335103
							0.0126757		0.0335103		0.0105631	0.0042253	0.40561		0.0042253
							0.031689		0.0126757		0.0335103	0.0042253	0.0190134		0.175343
							0.0335103		0.0335103		0.0253514	0.0335103	0.0295765		0.0380269
							0.0335103		0.0335103		0.0335103	0.0084505	0.124642		0.061265
							0.0401393		0.0335103		0.0335103	0.0042253	0.0866157		0.0190134
							0.0063379		0.0335103		0.0042253	0.0042253	0.042252		0.0335103
							0.0335103		0.0335103		0.0042253	0.0169009	0.0084505		0.0335103
							0.0169009		0.0232386		0.0335103	0.061265	0.0335103		0.270407
							0.329558		0.0063379		0.0335103	0.0464771	0.0823906		0.0063379
							0.0380269		0.0335103		0.0042253	0.0042253	0.29787		0.0335103
							0.0042253		0.0042253		0.0042253	0.0042253	0.0335103		0.0335103
							0.0253514		0.0084505		0.0335103	0.0084505	0.179568		0.0335103
							0.401384		0.0335103		0.0274639	0.0335103	0.0084505		0.0084505
							0.0591524		0.0335103		0.0335103	0.0042253	0.084503		0.0335103
							0.0042253		0.0335103		0.0335103	0.0042253	0.0042253		0.0063379
							0.0866157		0.0042253		0.0507022	0.0042253	0.0335103		0.0042253
							0.0063379		0.0084505		0.0335103	0.0042253	0.0126757		0.0335103
							0.0335103		0.0042253		0.0042253	0.0335103	0.0042253		0.0335103
							0.0063379		0.0335103		0.0042253	0.0042253	0.0042253		0.217594
							0.0084505		0.0335103		0.0042253	0.0335103	0.0042253		0.0042253
							0.0338017		0.0335103		0.0190134	0.0335103	0.0335103		0.0042253
							0.0335103		0.0335103		0.0335103	0.0335103	0.0335103		0.0335103
							0.0042253		0.0335103		0.0335103	0.0147883	0.0335103		0.0063379
							0.0042253		0.0335103		0.0335103	0.0042253	0.0042253		0.0063379
							0.111967		0.0335103		0.0126757	0.0335103	0.0042253		0.234494
							0.0335103		0.0335103		0.0042253	0.0335103	0.0335103		0.158443
							0.0335103		0.0042253		0.0335103	0.0084505	0.0084505		0.0042253
							0.103516		0.0253514		0.0042253	0.0802782	0.0335103		0.0507022
							0.0335103		0.0335103		0.0335103	0.061265	0.0084505		0.0253514
							0.194356		0.0126757		0.0063379	0.0126757	0.0335103		0.0147883
							0.0335103		0.0126757		0.0359142	0.0335103	0.0335103		0.240832
							0.0335103		0.0126757		0.0105631	0.0084505	0.0802782		0.101404
							0.466872		0.0063379		0.0335103	0.0042253	0.0042253		0.135205
							0.0295765		0.0042253		0.0042253	0.0042253	0.084503		0.0739403
							0.149993		0.0042253		0.0042253	0.0063379	0.0063379		0.352795
							0.0253514		0.0335103		0.0232386	0.0042253	0.0335103		0.0169009
							0.0042253		0.0042253		0.0335103	0.0335103	0.0335103		0.0335103
							0.274632		0.0335103		0.0335103		0.16478		0.0063379
							0.0042253		0.0042253		0.0042253		0.0335103		0.0042253
							0.0335103		0.0335103		0.0335103		0.0335103		0.0295765
							0.0084505		0.0084505		0.0335103		0.0335103		0.0401393
							0.0335103		0.0169009				0.0335103		0.0549274
							0.0232386		0.0335103				0.0147883		0.0335103
							0.103516		0.0335103				0.190131		0.0042253
							0.179568		0.0335103				0.0063379		0.0335103
							0.0335103		0.0335103				0.0147883		0.0042253
							0.0335103		0.0232386				0.316883		0.274632
							0.0335103		0.0147883				0.0591524		0.0042253
							0.0063379		0.128867				0.0335103		0.0401393
							0.16478		0.0335103				0.302095		0.194356
							0.0042253		0.238719				0.0105631		0.0042253
							0.0335103		0.0042253				0.0042253		0.0443645
							0.0971787		0.0338017				0.103516		0.188018
							0.0105631		0.0485898				0.0253514		0.171118
							0.0232386		0.0190134				0.0042253		0.0211261
							0.0084505		0.0335103				0.0335103		0.0274639
							0.0232386		0.0335103				0.0063379		0.0147883
							0.0105631		0.0335103				0.0063379		0.0042253
							0.0570397		0.031689				0.0084505		0.0084505
							0.0063379		0.0042253				0.0084505		0.234494
							0.0105631		0.0253514				0.0335103		0.0335103
							0.0105631		0.0063379				0.0335103		0.0084505
							0.0887282		0.0335103				0.0084505		0.031689
							0.0654902		0.0042253				0.0105631		0.0063379
							0.0063379		0.0335103				0.0335103		0.0042253
							0.158443		0.0335103				0.0335103		0.0359142
							0.0232386		0.0335103				0.0042253		0.0190134
							0.0232386		0.0335103				0.0335103		0.031689
							0.0042253		0.0063379				0.0063379		0.0042253
							0.0042253		0.0211261				0.0335103		0.0063379
							0.116192		0.325333				0.0335103		0.118304
							0.0105631		0.0338017				0.0063379		0.0335103
							0.0126757		0.0335103				0.0063379		0.0042253
							0.0169009		0.0042253				0.0335103		0.0274639
							0.0084505		0.0105631				0.0676026		0.031689
							0.042252		0.0042253				0.0654902		0.0190134
							0.0335103		0.177455				0.0042253		0.280969
							0.0190134		0.0190134				0.109854		0.0063379
							0.166893		0.0485898				0.0063379		0.0169009
							0.0335103		0.0211261				0.0042253		0.553492
							0.118304		0.141542				0.0211261		0.0335103
							0.0042253		0.0335103				0.0443645		0.0126757
							0.0335103		0.0190134				0.0335103		0.0042253
							0.0335103		0.0335103				0.0274639		0.0570397
							0.0084505		0.0464771				0.0084505		0.0335103
							0.0211261		0.0335103				0.0042253		0.0084505
							0.0528147		0.0929534				0.0274639		0.061265
							0.0105631		0.0335103				0.0232386		0.0042253
							0.0335103		0.0335103				0.0105631		0.0591524
							0.0335103		0.0335103				0.0443645		0.0042253
							0.259844		0.0042253				0.0992913		0.090841
							0.0335103		0.0335103				0.0335103		0.0335103
							0.0042253		0.0335103				0.0338017		0.0042253
							0.0823906		0.0335103				0.107741		0.114079
							0.143654		0.0335103				0.0335103		0.0169009
							0.0147883		0.0335103				0.0335103		0.0335103
							0.0042253		0.0105631				0.0335103		0.0887282
							0.031689		0.0042253				0.0042253		0.0105631
							0.0211261		0.0591524				0.0335103		0.0126757
							0.15633		0.0335103				0.0335103		0.276745
							0.0253514		0.0335103				0.0042253		0.0105631
							0.0169009		0.0335103				0.0042253		0.0105631
							0.0190134		0.0335103				0.0335103		0.0084505
							0.171118		0.0042253				0.0042253		0.0211261
							0.0042253		0.0042253				0.0335103		0.0485898
							0.0084505		0.0063379				0.0084505		0.0335103
							0.0042253		0.0042253				0.0335103		0.0401393
							0.0042253		0.0295765				0.0063379		0.0401393
							0.0232386		0.0190134				0.0042253		0.0190134
							0.0169009		0.0084505				0.0335103		0.0063379
							0.0253514		0.0335103				0.0147883		0.0274639
							0.15633		0.0042253				0.0042253		0.126754
							0.0126757		0.0063379				0.0126757		0.0084505
							0.14788		0.0084505				0.0549274		0.0126757
							0.031689		0.0335103				0.149993		0.0335103
							0.399271		0.0084505				0.0063379		0.0335103
							0.213369		0.0335103				0.0042253		0.209143
							0.0335103		0.0335103				0.0063379		0.318996
							0.346458		0.0042253				0.0042253		0.536585
							0.0335103		0.0042253				0.0335103		0.0274639
							0.0042253		0.0335103				0.0335103		0.41406
							0.0335103		0.0443645				0.0335103		0.0676026
							0.0042253		0.0042253				0.139429		0.528135
							0.0063379		0.329558				0.0335103		0.160555
							0.0105631		0.0042253				0.0335103		0.0063379
							0.0105631		0.226044				0.0232386		0.0084505
							0.0147883		0.0335103				0.0042253		0.124642
							0.0485898		0.0063379				0.0084505		0.321108
							0.0063379		0.0528147				0.0042253		0.215481
							0.0464771		0.32322				0.0042253		0.678131
							0.0232386		0.0549274				0.0335103		0.0253514
							0.0084505		0.0105631				0.0042253		0.190131
							0.268294		0.0274639				0.338008		0.0169009
							0.114079		0.0063379				0.0190134		0.454197
							0.0335103		0.0126757				0.15633		0.175343
							0.0105631		0.0887282				0.0147883		0.519686
							0.0380269		0.0760529				0.409835		0.0295765
							1.33513		0.141542				0.13098		0.0591524
							0.261957		0.0335103				0.175343		0.0335103
							0.0274639		0.0335103				0.0781655		0.0042253
							0.0335103		0.0335103				0.154217		0.477435
							0.0549274		0.0380269				0.528135		0.0042253
							0.0591524		0.0169009				0.259844		0.261957
							0.523913		0.0063379				0.0063379		0.0697152
							0.278858		0.0866157				0.0335103		0.542916
							0.0190134		0.0823906				0.124642		0.109854
							0.0718279		0.0042253				0.0802782		0.133092
							0.0042253		0.0335103				0.426734		0.166893
							0.0676026		0.0335103				0.0211261		0.468985
							0.0528147		0.0105631				0.0084505		0.0147883
							0.0295765		0.0211261				0.0126757		0.257732
							0.0169009		0.0335103				0.0063379		0.154217
							0.0084505		0.0338017				0.031689		0.376034
							0.0190134		0.0335103				0.289421		0.0042253
							0.0042253		0.0063379				0.0335103		0.0335103
							0.0042253		0.0042253				0.0335103		0.0169009
							0.0335103		0.0335103				0.0063379		0.126754
							0.0105631		0.0042253				0.061265		0.0401393
							0.0380269		0.0042253				0.0042253		0.435184
							0.0063379		0.0147883				0.0335103		0.0335103
							0.0169009		0.0063379				0.0063379		0.0549274
							0.0084505		0.124642				0.0335103		0.0335103
							0.0335103		0.0042253				0.0335103		0.0570397
							0.0147883		0.0335103				0.0232386		0.0147883
							0.0084505		0.143654				0.101404		0.0063379
							0.0697152		0.0443645				0.0338017		0.0126757
							0.0335103		0.0126757				0.0335103		0.0866157
							0.154217		0.0335103				0.0335103		0.0335103
							0.0335103		0.0084505				0.0335103		0.0042253
							0.0335103		0.0401393				0.0971787		0.0253514
							0.152105		0.0063379				0.0063379		0.0063379
							0.0084505		0.128867				0.0042253		0.0359142
							0.0335103		0.0084505				0.0042253		0.0084505
							0.0335103		0.0126757				0.0335103		0.0042253
							0.0084505		0.0335103				0.0126757		0.695029
							0.0335103		0.0126757				0.0971787		0.160555
							0.0042253		0.0654902				0.261957		0.154217
							0.0063379		0.251394				0.0211261		0.0528147
							0.0335103		0.0335103				0.0335103		0.0063379
							0.0126757		0.124642				0.0042253		0.0335103
							0.0485898		0.0105631				0.0084505		0.0866157
							0.0335103		0.232381				0.0528147		0.101404
							0.0335103		0.0063379				0.0335103		0.202806
							0.0335103		0.230269				0.0335103		0.0591524
							0.0335103		0.0063379				0.0335103		0.266182
							0.0126757		0.0401393				0.0042253		0.0147883
							0.0084505		0.0147883				0.0126757		0.310545
							0.0084505		0.0084505				0.0335103		0.0739403
							0.0042253		0.0084505				0.0042253		0.0887282
							0.0042253		0.0335103				0.0105631		0.0335103
							0.0211261		0.0063379				0.0335103		0.416172
							0.0335103		0.0190134				0.0335103		0.0253514
							0.0335103		0.0335103				0.0335103		0.0084505
							0.0126757		0.0335103				0.0335103		0.105629
							0.0084505		0.0335103				0.0359142		0.0105631
							0.0147883		0.0335103				0.0335103		0.0335103
							0.109854		0.0335103				0.0105631		0.114079
							0.0528147		0.0335103				0.0335103		0.0042253
							0.0335103		0.0443645				0.0084505		0.207031
							0.0169009		0.0335103				0.0335103		0.0084505
							0.0335103		0.0335103				0.0335103		0.0063379
							0.0063379		0.0335103						0.0335103
							0.0211261		0.0147883						0.105629
							0.0335103		0.0335103						0.0335103
							0.0084505		0.0335103						0.0084505
							0.0126757		0.0802782						0.350683
							0.0443645		0.0105631						0.0147883
							0.0335103		0.0105631						0.0485898
							0.031689		0.0105631						0.16478
							0.0253514		0.0084505						0.411946
							0.0042253		0.0335103						0.0781655
							0.0335103		0.0042253						0.264069
							0.0190134		0.0335103						0.0507022
							0.0147883		0.0042253						0.31477
							0.0929534		0.0335103						0.0507022
							0.0335103		0.0335103						0.849247
							0.0042253		0.0211261						0.137317
							0.0042253		0.0335103						0.0063379
							0.0232386		0.0335103						0.090841
							0.0063379		0.0335103						0.0335103
							0.0359142		0.0335103						0.477435
							0.0063379		0.0335103						0.0507022
							0.0063379		0.0335103						0.114079
							0.0335103		0.0126757						0.346458
							0.0274639		0.0971787						0.0063379
							0.0211261								0.101404
							0.15633								0.870367
							0.0570397								0.0335103
							0.0147883								0.384484
							0.0295765								0.0295765
							0.0042253								0.293645
							0.0335103								0.14788
							0.0335103								0.061265
							0.0335103								0.0190134
							0.0063379								0.439409
							0.103516								0.0253514
							0.0042253								0.0335103
							0.0335103								0.0105631
							0.0232386								0.27252
							0.031689								0.0211261
							0.0042253								0.0335103
							0.042252								0.0084505
							0.0335103								0.304207
							0.380258								0.0042253
							0.0190134								0.0211261
							0.0042253								0.0232386
							0.0105631								0.0063379
							0.0105631								0.321108
							0.0335103								0.376034
							0.0335103								0.114079
							0.0084505								0.0335103
							0.0042253								0.0042253
							0.0063379								0.291532
							0.0335103								0.0147883
							0.0335103								0.0042253
							0.0335103								0.0190134
							0.0084505								0.310545
							0.095066								0.152105
							0.0380269								0.785862
							0.0084505								0.0335103
							0.0042253								0.0335103
							0.0760529								0.0335103
							0.0126757								0.0147883
							0.0335103								0.0335103
							0.557709								0.0335103
							0.0335103								0.0063379
							0.0084505								0.133092
							0.0084505								0.042252
							0.0335103								0.0335103
							0.0335103								0.0063379
							0.0335103								0.0380269
							0.0042253								0.0335103
							0.0335103								0.0335103
							0.0335103								0.0126757
							0.0084505								0.0335103
							0.0084505								0.43096
							0.0211261								0.169005
							0.0105631								0.158443
							0.0338017								0.293645
							0.0401393								0.166893
							0.0335103								0.169005
							0.0335103								0.0971787
							0.031689								0.0335103
							0.0042253								0.0063379
							0.0335103								0.542916
							0.116192								0.042252
							0.0063379								0.0335103
							0.0147883								0.0295765
							0.0105631								0.0190134
							0.0335103								0.0084505
							0.0063379								0.0338017
							0.0063379								0.530255
							0.0335103								0.177455
							0.124642								0.194356
							0.0084505								0.0335103
							0.0084505								0.0211261
							0.0084505								0.0654902
							0.0335103								0.253507
							0.0042253								0.084503
							0.0063379								0.0211261
							0.0042253								0.143654
							0.0190134								0.0042253
							0.0063379								0.0042253
							0.0126757								0.0335103
							0.0147883								0.120417
							0.0042253								0.0335103
							0.0335103								0.0335103
							0.0042253								0.0169009
							0.0887282								0.0335103
							0.0063379								0.0335103
							0.0063379								0.27252
							0.0335103								0.0105631
							0.0464771								0.0063379
							0.0190134								0.0042253
							0.0335103								0.0633778
							0.0105631								0.202806
							0.0042253								0.0335103
							0.0169009								0.0063379
							0.0359142								0.0335103
							0.0335103								0.0042253
							0.0147883								0.0042253
							0.0335103								0.437297
							0.0335103								0.0507022
							0.0105631								0.114079
							0.0211261								0.145767
							0.0335103								0.061265
							0.0295765								0.0335103
							0.0126757								0.0335103
							0.0335103								0.0105631
							0.0335103								0.0335103
							0.0169009								0.0147883
							0.0042253								0.0042253
							0.0335103								0.0485898
							0.0335103								0.101404
							0.0335103								0.0042253
							0.0105631								0.0063379
							0.0335103								0.0335103
							0.0335103								0.0335103
							0.0335103								0.0042253
							0.0335103								0.0084505
							0.0335103								0.0063379
							0.0042253								0.0335103
							0.0335103								0.0335103
							0.0084505								0.0042253
							0.0042253								0.188018
							0.0084505								0.0335103
							0.0042253								0.0063379
							0.0335103								0.095066
							0.0335103								0.0063379
							0.0335103								0.0380269
							0.0335103								0.0335103
							0.0063379								0.0654902
							0.0335103								0.0676026
							0.0335103								0.0335103
							0.0335103								0.0105631
							0.0084505								0.0042253
							0.0042253								0.0335103
							0.0232386								0.042252
							0.0570397								0.0063379
							0.0063379								0.0042253
							0.325333								0.0084505
							0.0549274								0.0042253
							0.0335103								0.0335103
							0.0042253								0.0823906
							0.0042253								0.0042253
							0.0335103								0.0042253
							0.0335103								0.0335103
							0.0335103								0.109854
							0.0335103								0.105629
							0.0718279								0.0633778
							0.0084505								0.0211261
							0.0335103								0.0335103
							0.0335103								0.0042253
							0.0084505								0.0126757
							0.0335103								0.0084505
							0.0084505								0.0232386
							0.0335103								0.204918
							0.0335103								0.0042253
							0.160555								0.0063379
							0.0971787								0.0335103
							0.0335103								0.0084505
							0.0084505								0.0335103
							0.0335103								0.0126757
							0.0042253								0.0147883
							0.0335103								0.0084505
							0.0169009								0.0253514
							0.0105631								0.169005
							0.0042253								0.0335103
							0.0126757								0.0105631
							0.0042253								0.0084505
							0.0084505								0.0654902
							0.0335103								0.0335103
							0.0169009								0.0443645
							0.0042253								0.266182
							0.291532								0.0760529
							0.0335103								0.107741
							0.0042253								0.0335103
							0.0211261								0.0335103
							0.0063379								0.0335103
							0.0169009								0.0042253
							0.0232386								0.0105631
							0.0253514								0.0335103
							0.500673								0.0063379
							0.0042253								0.0042253
							0.0335103								0.0335103
							0.0338017								0.0591524
							0.0335103								0.0335103
							0.0042253								0.215481
							0.0335103								0.0105631
							0.388709								0.0335103
							0.0147883								0.0211261
							0.0105631								0.0335103
							0.0335103								0.166893
							0.0335103								0.0335103
							0.0063379								0.238719
							0.135205								0.0042253
							0.0335103								0.299982
							0.0232386								0.0147883
							0.0084505								0.0063379
							0.0211261								0.116192
							0.0335103								0.0042253
							0.0042253								0.133092
							0.0335103								0.152105
							0.0335103								0.0335103
							0.0335103								0.0169009
							0.411946								0.0335103
							0.0126757								0.0335103
							0.0335103								0.0335103
							0.042252								0.0042253
							0.0042253								0.0063379
							0.0147883								0.31477
							0.0335103								0.0042253
							0.0335103								0.0063379
							0.0335103								0.0335103
							0.369696								0.0084505
							0.0464771								0.0335103
							0.0126757								0.0335103
							0.0335103								0.0295765
							0.0335103								0.0802782
							0.0335103								0.0335103
							0.0507022								0.0335103
							0.0335103								0.0633778
							0.0042253								0.0105631
							0.0063379								0.0063379
							0.0335103								0.0295765
							0.133092								0.0063379
							0.0063379								0.0335103
							0.0335103								0.0169009
							0.232381								0.0042253
							0.0105631								0.0335103
							0.0253514								0.0063379
							0.0063379								0.0063379
							0.0063379								0.0063379
							0.0169009								0.357021
							0.0042253								0.126754
							0.0063379								0.0335103
							0.0126757								0.0147883
							0.0335103								0.0335103
							0.0335103								0.0042253
							0.0147883								0.0042253
							0.175343								0.0063379
							0.0147883								0.0042253
							0.0042253								0.0042253
							0.114079								0.0042253
							0.0335103								0.0042253
							0.0335103								0.0335103
							0.0084505								0.0063379
							0.0063379								0.0105631
							0.0169009
							0.0042253
							0.0042253
							0.325333
							0.0211261
							0.0169009
							0.0335103
							0.0211261
							0.0335103
							0.0335103
							0.126754
							0.0338017
							0.0528147
							0.0084505
							0.0126757
							0.0335103
							0.0401393
							0.40561
							0.0084505
							0.0042253
							0.0042253
							0.0485898
							0.0211261
							0.0359142
							0.0232386
							0.0253514
							0.103516
							0.0126757
							0.0126757
							0.0084505
							0.0063379
							0.251394
							0.0105631
							0.0169009
							0.202806
							0.16478
							0.0126757
							0.0295765
							0.0042253
							0.0147883
							0.0464771
							0.0464771
							0.0105631
							0.0528147
							0.0232386
							0.268294
							0.0335103
							0.0063379
							0.0169009
							0.0697152
							1.09639
							0.0063379
							0.0190134
							0.268294
							0.0335103
							0.0105631
							0.031689
							0.0105631
							0.0063379
							0.0063379
							0.0335103
							0.0335103
							0.0042253
							0.242945
							0.0335103
							0.0063379
							0.0335103
							0.0654902
							0.0335103
							0.0126757
							0.0042253
							0.0335103
							0.0335103
							0.0063379
							0.0335103
							0.0126757
							0.0042253
							0.0063379
							0.291532
							0.0105631
							0.0335103
							0.0335103
							0.0147883
							0.0042253
							0.0335103
							0.0335103
							0.0084505
							0.0335103
							0.0063379
							0.0443645
							0.0105631
							0.0042253
							0.196468
							0.0232386
							0.0063379
							0.0335103
							0.0042253
							0.0335103
							0.0084505
							0.0042253
							0.0084505
							0.0335103
							0.0380269
							0.0335103
							0.118304
							0.0335103
							0.0042253
							0.0126757
							0.0042253
							0.0042253
							0.0335103
							0.0169009
							0.0335103

## Sheet: Fig. 1E ES-Hsp104 foci vol
Ethanol stress (8.5%) Hsp104 foci vol (µm^3)
0 min				2.5 min		10 min		15 min		30 min		60 min		90 min		120 min		150 min		180 min
replicate 1	replicate 2	replicate 3	replicate 4	replicate 1	replicate 2	replicate 1	replicate 2	replicate 1	replicate 2	replicate 1	replicate 2	replicate 1	replicate 2	replicate 1	replicate 2	replicate 1	replicate 2	replicate 1	replicate 2	replicate 1	replicate 2
0.084503		0.0190134	0.031689	0.0739403		0.0063379							0.0335103		0.0676026		0.0781655		0.0042253		0.0105631
0.0274639		0.0335103	0.0335103	0.0063379		0.0971787							0.0335103		0.0169009		0.312658		0.18168		0.295757
0.0169009		0.139429	0.0335103	0.0063379		0.109854							0.0335103		0.0802782		0.0549274		0.0507022		0.0335103
0.47321	0.0190134	0.0335103	0.0335103	0.0335103	0.0335103	0.0507022	0.557479	0.0760529	0.0063379	0.0335103	0.0105631	0.0105631	0.0147883	0.0042253	0.118304	0.0042253	0.0190134	0.270407	0.0591524		0.0335103
0.0063379	0.583067	0.0084505	0.152105	0.0335103	0.0335103	0.190131	0.0335103	0.0443645	0.0380269	0.0335103	0.0335103	0.0335103	0.0063379	0.0105631	0.0359142	0.0335103	0.105629	0.0570401	0.0042253		0.130979
0.0992913	0.0084505	0.0084505	0.0335103	0.0042253	0.061265	0.185906	0.0358998	0.0335103	0.0105631	0.0335103	0.0335103	0.0335103	0.133092	0.318996	0.031689	0.0335103	0.0549274	0.234494	0.274632		0.0549274
0.0084505	0.0654902	0.0335103	0.0335103	0.0042253	0.0335103	0.0295765	0.0232294	0.0063379	0.618966	0.0633778	0.109854	0.0335103	0.120417	0.0739403	0.0528147	0.0802782	0.198581	0.162668	0.109854		0.0676026
0.0359142	0.0338017	0.0335103	0.175343	0.0335103	0.363359	0.0335103	0.0063354	0.0335103	0.0147883	0.0335103	0.0042253	0.0042253	0.0802782	0.0802782	0.143654	0.0633778	0.0063379	0.139429	0.0335103		0.0359142
0.321108	0.464759	0.0335103	0.0063379	0.386597	0.0147883	0.133092	0.0335103	0.283083	0.0084505	0.0042253	0.0401393	0.031689	0.0063379	0.162668	0.0676026	0.331671	0.095066	0.188018	0.0866157		0.120417
0.471097	0.0718279	0.143654	0.061265	0.0063379	0.0063379	0.111967	0.0084472	0.0105631	0.0084505	0.126754	0.0676026	0.0359142	0.0335103	0.0335103	0.0591524	0.0739403	0.0190134	0.190131	0.031689		0.202806
0.0335103	0.583067	0.0335103	0.0335103	0.0126757	0.0866157	0.0485898	0.0105589	0.0335103	0.0443645	0.0335103	0.090841	0.0633778	0.0335103	0.340121	0.0063379	0.128867	0.152105	0.0401393	0.0359142		0.0443645
0.031689	0.0338017	0.031689	0.0190134	0.709818	0.618966	0.0335103	0.12248	0.0335103	0.0147883	0.0338017	0.557709	0.380258	0.287308	0.158443	0.219706	0.169005	0.111967	0.304208	0.031689		0.0507022
0.0335103	0.160555	0.0063379	0.0335103	0.0335103	0.0485894	0.221819	0.0335103	0.0335103	0.0507022	0.0084505	0.0338017	0.15633	0.0781655	0.0464771	0.0528147	0.133092	0.031689	0.120417	0.0464771		0.245057
0.0887282	0.137317	0.0335103	0.0042253	0.0335103	0.0335103	0.152105	0.261852	0.0335103	0.0253512	0.0105631	0.0335103	0.0335103	0.0211261	0.0335103	0.0335103	0.217594	0.0887282	0.26407	0.111967		0.0485894
0.0190134	0.215481	0.0992913	0.0042253	0.0063379	0.0063379	0.0443645	0.107698	0.0718279	0.0443645	0.0335103	0.0063379	0.031689	0.0084505	0.179568	0.0633774	0.0633778	0.291532	0.0380269	0.0359142		0.344345
0.0676026	0.0335103	0.0335103	0.0190134	0.0147883	0.0507022	0.50701	0.0992515	0.0335103	0.0485894	0.0507022	0.0126757	0.0105631	0.0335103	0.122529	0.0274639	0.278858	0.0147883	0.122529	0.310545		0.245057
0.0105631	0.270407	0.0335103	0.0211261	0.111967	0.0063379	0.042252	0.166826	0.061265	0.090841	0.103516	0.0718279	0.0718279	0.0485894	0.122529	0.0528147	0.316883	0.0253512	0.0633778	0.369696		0.30632
0.15633	0.521797	0.0190134	0.0335103	0.0887282	0.0190134	0.0063379	0.0570172	0.0335103	0.0042253	0.0443645	0.0570397	0.0464771	0.0633774	0.0042253	0.0211261	0.0190134	0.0359142	0.18168	0.0528147		0.411946
0.0338017	0.5725	0.0335103	0.0443645	0.0335103	0.443635	0.0549274	0.0042236	0.0485898	0.0335103	0.0401393	0.0359142	0.0147883	0.207031	0.0042253	0.0105631	0.0359142	0.042252	0.0169009	0.031689		0.0443645
0.114079	0.0335103	0.0042253	0.0335103	0.0335103	0.0359142	0.0335103	0.0295647	0.0633778	0.0211261	0.0359142	0.0042253	0.202806	0.0105631	0.14788	0.0169009	0.162668	0.090841	0.0147883	0.16478		0.0866157
0.0697152	0.289421	0.0335103	0.0335103	0.0169009	0.492223	0.426734	0.0168942	0.0718279	0.0335103	0.0697152	0.0718279	0.0274639	0.0507022	0.0335103	0.449971	0.0359142	0.0335103	0.200693	0.141542		0.162668
0.0823906	0.0929534	0.0335103	0.0105631	0.321108	0.0654902	0.509124	0.0063354	0.107741	0.0335103	0.268294	0.0169009	0.0063379	0.190131	0.171118	0.0591524	0.0845035	0.0528147	0.500673	0.204918		0.0253512
0.120417	0.0570397	0.0335103	0.251394	0.0084505	0.179568	0.0718279	0.0464584	0.0105631	0.0295765	0.202806	0.135205	0.0169009	0.0335103	0.090841	0.0084505	0.042252	0.124642	0.0401393	0.0338017		0.0929534
0.0823906	0.369696	0.0335103	0.0335103	0.0042253	0.0507022	0.152105	0.0084472	0.0084505	0.0335103	0.0528147	0.0211261	0.143654	0.0633774	0.126754	0.0063379	0.0042253	0.101403	0.327445	0.0380269		0.0633774
0.217594	0.0464771	0.0335103	0.0335103	0.0042253	0.0042253	0.310545	0.0696873	0.0105631	0.0485894	0.0549274	0.0335103	0.0401393	0.0570397	0.0042253	0.0105631	0.095066	0.0380269	0.0971787	0.0549274		0.0633774
0.0063379	0.0929534	0.274632	0.0335103	0.0084505	0.25562	0.0042253	0.0147823	0.0105631	0.194356	0.0105631	0.0232386	0.0929534	0.0549274	0.0570401	0.061265	0.0866157	0.268294	0.0887282	0.0359142		0.042252
0.0335103	0.0570397	0.0335103	0.0335103	0.0274639	0.0654902	0.0211261	0.166826	0.316883	0.0042253	0.042252	0.0063379	0.105629	0.107741	0.0335103	0.0063379	0.0443645	0.0887282	0.304208	0.0335103		0.574603
0.0335103	0.0654902	0.504897	0.0335103	0.0335103	0.344345	0.0084505	0.0717991	0.0084505	0.0042253	0.0802782	0.0335103	0.0335103	0.33167	0.0169009	0.204918	0.0253514	0.240832	0.124642	0.194356		0.111967
0.0718279	0.116192	0.0335103	0.0335103	0.0549274	0.0084505	0.183793	0.0380116	0.276745	0.0739403	0.441523	0.0253512	0.111967	0.236606	0.0823906	0.109854	0.0335103	0.0063379	0.0335103	0.357021		0.502785
0.120417	0.0253514	0.0211261	0.0335103	0.0105631	0.124642	0.152105	0.137262	0.095066	0.0401393	0.0654902	0.483772	0.196469	0.0042253	0.0570401	0.0823906	0.0335103	0.0528147	0.0676026	0.0084505		0.031689
0.369696	0.832339	0.0335103	0.0335103	0.061265	0.0676026	0.114079	0.530034	0.0211261	0.0528147	0.120417	0.16478	0.169005	0.0335103	0.0718279	0.0042253	0.0335103	0.0802782	0.0335103	0.289419		0.0464771
0.0105631	0.0359142	0.0042253	0.0401393	0.137317	0.0274639	0.145767	0.0295647	0.122529	0.0380269	0.141542	0.0739403	0.251394	0.090841	0.23872	0.0335103	0.031689	0.0147883	0.133092	0.304207		0.0211261
0.0697152	0.0549274	0.135205	0.0335103	0.0335103	0.0147883	0.0676026	0.0316762	0.0802782	0.0697152	0.0042253	0.0443645	0.0126757	0.0335103	0.276745	0.0380269	0.0211261	0.18168	0.0507022	0.042252		0.103516
0.0335103	0.042252	0.29787	0.0335103	0.0335103	0.268294	0.111967	0.0190059	0.0084505	0.0084505	0.0802782	0.437297	0.0380269	0.061265	0.519686	0.0971787	0.0042253	0.0147883	0.0042253	0.251394		0.388709
0.17323	0.0718279	0.0063379	0.0335103	0.0335103	0.242944	0.124642	0.0335103	0.0549274	0.312658	0.0169009	0.251394	0.0042253	0.0338017	0.0633778	0.0232386	0.133092	0.0147883	0.0443645	0.158443		0.0781655
0.0549274	0.0654902	0.031689	0.0335103	0.0147883	0.0464771	0.0718279	0.0211176	0.14788	0.0887282	0.0443645	0.175343	0.0335103	0.0335103	0.251394	0.0380269	0.0084505	0.0697152	0.500673	0.0570397		0.0063379
0.0335103	0.226044	0.0147883	0.0335103	0.0042253	0.090841	0.0169009	0.48569	0.141542	0.0335103	0.0335103	0.0335103	0.158443	0.0401393	0.492223	0.0335103	0.0169009	0.0169009	0.236606	0.0380269		0.0464771
0.555598	0.0105631	0.133092	0.0335103	0.0335103	0.0147883	0.0380269	0.0886926	0.291533	0.0380269	0.0781655	0.0992909	0.152105	0.0126757	0.152105	0.0232386	0.0105631	0.0295765	0.0464771	0.230269		0.701366
0.637984	0.0549274	0.0335103	0.0739403	0.061265	0.0676026	0.0401393	0.538487	0.0507022	0.179568	0.207031	0.0084505	0.0802782	0.0507022	0.257732	0.111967	0.0169009	0.0295765	0.0335103	0.0528147		0.109854
0.0042253	0.16478	0.0335103	0.0335103	0.152105	0.0971787	0.304208	0.13515	0.0654902	0.0739403	0.0063379	0.122529	0.0042253	0.0211261	0.042252	0.0232386	0.0718279	0.084503	0.0591524	0.0570397		0.135205
0.0718279	0.0169009	0.0295765	0.0335103	0.0295765	0.0274639	0.0697152	0.0335103	0.158443	0.0335103	0.0718279	0.0338017	0.0887282	0.116192	0.0443645	0.0295765	0.0042253	0.0823906	0.0042253	0.0697152		0.135205
0.0169009	0.0760529	0.0335103	0.0042253	0.0042253	0.0528147	0.061265	0.0190059	0.0591524	0.0042253	0.0335103	0.122529	0.095066	0.0570397	0.0147883	0.0528147	0.0190134	0.135205	0.0335103	0.285195		0.0042253
0.0676026	0.830222	0.359134	0.0335103	0.0335103	0.0042253	0.327445	0.0865812	0.0335103	0.0105631	0.49011	0.031689	0.0335103	0.0443645	0.280971	0.0232386	0.0253514	0.154217	0.0335103	0.185906		0.217594
0.0126757	0.354909	0.0697152	0.0335103	0.285196	0.0335103	0.223931	0.0591289	0.209143	0.0063379	0.0126757	0.15633	0.359134	0.0274639	0.0084505	0.0570397	0.0335103	0.0274639	0.0105631	0.111967		0.0507022
0.105629	0.0126757	0.0335103	0.0147883	0.0528147	0.0042253	0.042252	0.181608	0.204918	0.0338017	0.0190134	0.0335103	0.095066	0.0507022	0.061265	0.175343	0.0335103	0.154217	0.0335103	0.564056		0.0105631
0.0591524	0.228156	0.0084505	0.084503	0.0105631	0.0063379	0.0845035	0.215395	0.0084505	0.0335103	0.0781655	0.0338017	0.0760529	0.0147883	0.171118	0.0654902	0.418285	0.0295765	0.0781655	0.0718279		0.0591524
0.192244	0.0507022	0.0335103	0.0335103	0.0380269	0.0335103	0.0802782	0.0886926	0.0697152	0.0063379	0.0528147	0.0676026	0.0464771	0.0802782	0.333783	0.861908	0.338008	0.0190134	0.0464771	0.0718279		0.0464771
0.0126757	0.0760529	0.0335103	0.0084505	0.0335103	0.0042253	0.0063379	0.0464584	0.251394	0.399271	0.0739403	0.128867	0.0781655	0.0084505	0.0274639	0.124642	0.0971787	0.0802782	0.0126757	0.105629		0.16478
0.116192	0.095066	0.0126757	0.0335103	0.175343	0.266182	0.0464771	0.0063354	0.466872	0.0335103	0.200693	0.0147883	0.0063379	0.0359142	0.0887282	0.145767	0.0549274	0.118304	0.095066	0.0063379		0.0464771
0.200693	0.60207	0.0042253	0.0401393	0.0697152	0.0335103	0.128867	0.418116	0.223931	0.0359142	0.221819	0.128867	0.0823906	0.0295765	0.124642	0.0464771	0.0335103	0.109854	0.0739403	0.409835		0.475322
0.918943	0.0253514	0.18168	0.0528147	0.0105631	0.0169009	0.0739403	0.0380116	0.0971787	0.128867	0.192244	0.30632	0.0781655	0.0443645	0.0401393	0.188018	0.0591524	0.365471	0.0063379	0.0169009		0.395046
0.0105631	0.0359142	0.0042253	0.0335103	0.228156	0.574603	0.0929534	0.0211176	0.031689	0.090841	0.502786	0.0253512	0.0380269	0.0147883	0.188018	0.0105631	0.0274639	0.130979	0.0105631	0.0591524		0.0211261
0.0084505	0.095066	0.0042253	0.0335103	0.0335103	0.0190134	0.276745	0.0464584	0.196469	0.0063379	0.192244	0.0295765	0.378147	0.0232386	0.0335103	0.0380269	0.120417	0.0549274	0.0335103	0.211256		0.0823906
0.0335103	0.0739403	0.264069	0.0335103	0.310545	0.0042253	0.0084505	0.141485	0.0654902	0.0211261	0.139429	0.0464771	0.0380269	0.0823906	0.0570401	0.0359142	0.27252	0.261957	0.0887282	0.0507022		0.49856
0.0147883	0.0781655	0.0126757	0.845005	0.0335103	0.0232386	0.213369	0.0335103	0.169005	0.0718279	0.25562	0.289419	0.0335103	0.0232386	0.162668	0.0295765	0.0697152	0.166893	0.295758	0.200693		0.32322
0.0802782	0.0802782	0.0507022	0.0401393	0.0063379	0.130979	0.0591524	0.291415	0.612631	0.090841	0.0190134	0.245057	0.0274639	0.0335103	0.0887282	0.0042253	0.0063379	0.0211261	0.0359142	0.162668		0.226044
0.0359142	0.291532	0.061265	0.0042253	0.0063379	0.0253512	0.344345	0.0335103	0.0992913	0.0211261	0.0654902	0.0992909	0.0042253	0.0335103	0.0042253	0.061265	0.185906	0.0335103	0.0338017	0.299982		0.0147883
0.312658	0.259844	0.0335103	0.0084505	0.0063379	0.230269	0.441523	0.0886926	0.0929534	0.0126757	0.0570401	0.0866157	0.0929534	0.0084505	0.0929534	0.0147883	0.0042253	0.0802782	0.211256	0.128867		0.188018
0.0335103	0.0887282	0.107741	0.0335103	0.0084505	0.0992909	0.13098	0.0717991	0.363359	0.0084505	0.118304	0.0169009	0.0335103	0.196468	0.399271	0.0929534	0.0274639	0.128867	0.0464771	0.240832		0.0570397
0.0042253	0.0866157	0.50701	0.0335103	0.0335103	0.0084505	0.101404	0.0527936	0.0760529	0.0380269	0.0887282	0.0401393	0.0507022	0.0971787	0.188018	0.0253512	0.0929534	0.128867	0.116192	0.274632		0.0697152
0.287308	0.217594	0.0063379	0.18168	0.114079	0.031689	0.0211261	0.0358998	0.0507022	0.130979	0.143654	0.090841	0.0335103	0.0697152	0.92107	0.095066	0.0507022	0.726709	0.0845035	0.0105631		0.27252
0.357021	0.0549274	0.0335103	0.0042253	0.0335103	0.0823906	0.0528147	0.0211176	0.0443645	0.49856	0.0042253	0.274632	0.0042253	0.0147883	0.0739403	0.0335103	0.0485898	0.188018	0.122529	0.0401393		0.0335103
0.0084505	0.0697152	0.0253514	0.0335103	0.0063379	0.0591524	0.0401393	0.0335103	0.162668	0.477435	0.0042253	0.169005	0.0335103	0.422509	0.0338017	0.0866157	0.031689	0.0335103	0.0528147	0.0211261		0.031689
0.0335103	0.111967	0.0887282	0.0335103	0.0335103	0.0084505	0.234494	0.0253411	0.211256	0.107741	0.0211261	0.0633774	0.0084505	0.443635	0.0802782	0.111967	0.0190134	0.114079	0.0866157	0.291532		0.287308
0.0591524	0.545043	0.0359142	0.318996	0.0063379	0.665445	0.0929534	0.316756	0.152105	0.0929534	0.0760529	0.0676026	0.219707	0.0126757	0.120417	0.130979	0.154217	0.209143	0.0126757	0.302095		0.0105631
0.0335103	0.0802782	0.120417	0.0042253	0.0169009	0.0126757	0.0760529	0.0105589	0.0335103	0.0105631	0.15633	0.0042253	0.0359142	0.0464771	0.0718279	0.0063379	0.213369	0.042252	0.0739403	0.0335103		0.0042253
0.0126757	0.111967	0.0464771	0.0781655	0.580943	0.0802782	0.103516	0.154155	0.0169009	0.0190134	0.105629	0.200693	0.179568	0.0147883	0.285196	0.420397	0.0380269	0.0992909	0.0063379	0.0335103		0.0295765
0.25562	0.27252	0.0190134	0.0084505	0.0335103	0.0211261	0.095066	0.042235	0.114079	0.0676026	0.0528147	0.162668	0.0147883	0.042252	0.0887282	0.105629	0.0697152	0.17323	0.120417	0.0528147		0.0401393
0.0063379	0.0866157	0.0633778	0.0335103	0.0335103	0.0105631	0.0549274	0.314645	0.0570401	0.185906	0.0507022	0.111967	0.042252	0.141542	0.0464771	0.0528147	0.114079	0.238719	0.0063379	0.154217		0.0335103
0.487998	0.0718279	0.0232386	0.200693	0.0335103	0.462647	0.887271	0.0063354	0.0591524	0.0126757	0.13098	0.202806	0.270407	0.0697152	0.0549274	0.0335103	0.340121	0.24717	0.061265	0.152105		0.0190134
0.392934	0.0485898	0.0335103	0.0335103	0.0295765	0.0042253	0.0570401	0.0147823	0.0485898	0.18168	0.0718279	0.0169009	0.0549274	0.090841	0.145767	0.0570397	0.0781655	0.219706	0.0335103	0.141542		0.215481
0.0697152	0.111967	0.0335103	0.274632	0.0042253	0.133092	0.0042253	0.120368	0.0528147	0.0335103	0.13098	0.0760529	0.0485898	0.0105631	0.0654902	0.0042253	0.0042253	0.202806	0.0485898	0.0335103		0.0802782
0.0570397	0.120417	0.665445	0.0147883	0.0335103	0.0507022	0.137317	0.0696873	0.92107	0.196468	0.956984	0.137317	0.154217	0.0781655	0.107741	0.0570397	0.0232386	0.0380269	0.126754	0.226044		0.380258
0.154217	0.14788	0.0335103	0.0718279	0.0485898	0.0654902	0.0823906	0.0717991	0.042252	0.0549274	0.111967	0.0823906	0.0063379	0.0211261	0.487998	0.0676026	0.128867	0.211256	0.0781655	0.0274639		0.0105631
0.0335103	0.160555	0.0335103	0.0147883	0.0359142	0.0063379	0.126754	0.120368	0.0147883	0.209143	0.0528147	0.0760529	0.16478	0.139429	0.116192	0.0063379	0.101404	0.0232386	0.0105631	0.0147883		0.411946
0.0042253	0.213369	0.0335103	0.0335103	0.0042253	0.0126757	0.0232386	0.0295647	0.43096	0.215481	0.0739403	0.564056	0.0042253	0.118304	0.118304	0.031689	0.0570401	0.209143	0.141542	0.0866157		0.283083
0.114079	0.318996	0.0253514	0.0570397	0.0335103	0.0211261	0.149993	0.050682	0.0654902	0.226044	0.0253514	0.0401393	0.0992913	0.126754	0.23872	0.0274639	0.0335103	0.190131	0.177455	0.0697152		0.149993
0.0718279	0.0654902	0.0063379	0.0359142	0.0335103	0.0084505	0.120417	0.160491	0.0697152	0.0147883	0.061265	0.200693	0.0338017	0.061265	0.190131	0.0887282	0.0335103	0.0676026	0.0570401	0.107741		0.238719
0.0063379	0.382371	0.0335103	0.17323	0.0401393	0.338008	0.0335103	0.0295647	0.0760529	0.122529	0.371808	0.0335103	0.0570401	0.0443645	0.0887282	0.217594	0.845005	0.061265	0.160555	0.128867		0.0335103
0.194356	0.0232386	0.031689	0.0335103	0.0654902	0.0063379	0.0211261	0.0950277	0.109854	0.0359142	0.268294	0.0929534	0.101404	0.162668	0.137317	0.152105	0.090841	0.0190134	0.0380269	0.0084505		0.56193
0.128867	0.0929534	0.0169009	0.0335103	0.0335103	0.0443645	0.124642	0.0335103	0.0760529	0.0335103	0.276745	0.0274639	0.0781655	0.365471	0.128867	0.0335103	0.0739403	0.223931	0.143654	0.0147883		0.215481
0.0335103	0.378147	0.0335103	0.0335103	0.0084505	0.0084505	0.0147883	0.213283	0.0232386	0.312658	0.158443	0.031689	0.124642	0.0866157	0.0359142	0.0697152	0.236606	0.090841	0.0887282	0.141542		0.0232386
0.0063379	0.0507022	0.0042253	0.103516	0.0335103	0.0169009	0.0335103	0.0570172	0.0697152	0.0335103	0.0042253	0.0169009	0.0063379	0.0380269	0.204918	0.0335103	0.0147883	0.0126757	0.0401393	0.090841		0.202806
0.105629	0.0042253	0.0335103	0.0335103	0.0063379	0.0253512	0.0295765	0.0335103	0.160555	0.0042253	0.0443645	0.51546	0.0211261	0.152105	0.202806	0.0295765	0.0845035	0.0802782	0.126754	0.0063379		0.0253512
0.0401393	0.705593	0.240832	0.0335103	0.0401393	0.0063379	0.460534	0.0335103	0.154217	0.0760529	0.0739403	0.0507022	0.0063379	0.0359142	0.0335103	0.0253512	0.137317	0.162668	0.24717	0.0335103		0.0760529
0.0042253	0.0528147	0.183793	0.0042253	0.0335103	0.0126757	0.0335103	0.0335103	0.0335103	0.0335103	0.0992913	0.0781655	0.0042253	0.0335103	0.0084505	0.447859	0.15633	0.253506	0.095066	0.0063379		0.0359142
0.424622	0.111967	0.0335103	0.0042253	0.031689	0.0335103	0.0591524	0.0042236	0.0802782	0.101403	0.0042253	0.283083	0.169005	0.0335103	0.257732	0.0549274	0.249282	0.158443	0.25562	0.228156		0.0718279
0.0485898	0.128867	0.0105631	0.200693	0.0042253	0.0042253	0.031689	0.0042236	0.0126757	0.143654	0.090841	0.0697152	0.0335103	0.0295765	0.095066	0.0232386	0.128867	0.542916	0.171118	0.462647		0.0335103
0.0335103	0.133092	0.0211261	0.0380269	0.0335103	0.0084505	0.0335103	0.0335103	0.122529	0.0335103	0.0570401	0.126754	0.0866157	0.133092	0.0823906	0.0335103	0.304208	0.0802782	0.557709	0.249282		0.0718279
0.0169009	0.18168	0.0335103	0.0063379	0.0335103	0.0274639	0.0380269	0.0042236	0.342233	0.0232386	0.141542	0.15633	0.0485898	0.0042253	0.0992913	0.0335103	0.139429	0.0042253	0.109854	0.0359142		0.152105
0.0084505	0.238719	0.0169009	0.536585	0.0335103	0.0211261	0.0676026	0.289304	0.111967	0.169005	0.0147883	0.0042253	0.0126757	0.166893	0.0190134	0.0528147	0.0443645	0.0401393	0.114079	0.261957		0.0232386
0.0042253	0.0528147	0.0335103	0.0338017	0.0063379	0.0338017	0.274632	0.0042236	0.0760529	0.0063379	0.188018	0.160555	0.031689	0.122529	0.13098	0.0084505	0.0549274	0.333783	0.0147883	0.0528147		0.0485894
0.103516	0.090841	0.0335103	0.0335103	0.868253	0.122529	0.274632	0.0443466	0.0887282	0.0105631	0.462647	0.0105631	0.0335103	0.061265	0.031689	0.0042253	0.0232386	0.0676026	0.0338017	0.0781655		0.0211261
0.0063379	0.139429	0.0042253	0.175343	0.0335103	0.105629	0.162668	0.0042236	0.190131	0.316883	0.175343	0.232381	0.0570401	0.0253512	0.0929534	0.0443645	0.251394	0.0633774	0.109854	0.0274639		0.0063379
0.0654902	0.259844	0.0335103	0.0335103	0.0042253	0.0335103	0.0676026	0.37166	0.0274639	0.0359142	0.0464771	0.0380269	0.0335103	0.095066	0.217594	0.18168	0.114079	0.0063379	0.0147883	0.042252		0.0232386
1.29286	0.0443645	0.0169009	0.031689	0.0633778	0.0335103	0.253507	0.0358998	0.0190134	0.0359142	0.0464771	0.122529	0.443635	0.0335103	0.139429	0.0401393	0.0211261	0.154217	0.0335103	0.120417		0.0654902
0.109854	0.0253514	0.202806	0.0335103	0.0335103	0.162668	0.0823906	0.217506	0.0335103	0.0359142	0.0063379	0.042252	0.0485898	0.0633774	0.0760529	0.103516	0.0042253	0.249282	0.0697152	0.103516		0.084503
0.232381	0.526021	0.042252	0.511236	0.0335103	0.0359142	0.0335103	0.13515	0.0335103	0.0359142	0.0335103	0.0401393	0.0042253	0.0823906	0.116192	0.0338017	0.198581	0.116192	0.0718279	0.0232386		0.128867
0.160555	0.0335103	1.05414	0.0335103	0.0335103	0.0042253	0.0274639	0.149932	0.095066	0.0485894	0.0169009	0.33167	0.0697152	0.162668	0.289421	0.0739403	0.061265	0.428847	0.095066	0.0591524		0.0929534
0.329558	0.0211261	0.0335103	0.0335103	0.0654902	0.29787	0.0823906	0.0295647	0.0718279	0.0570397	0.0929534	0.420397	0.23872	0.215481	0.0295765	0.111967	0.0887282	0.0147883	0.0823906	0.0570397		0.0211261
0.0992913	0.090841	0.0335103	0.0335103	0.0335103	0.17323	0.0464771	0.114033	0.0063379	0.0335103	0.0147883	0.0335103	0.0253514	0.0126757	0.0274639	0.179568	0.111967	0.031689	0.0443645	0.141542		0.0063379
0.111967	0.0335103	0.126754	0.278857	0.0042253	0.116192	0.0507022	0.0950277	0.0042253	0.0274639	0.0105631	0.179568	0.0443645	0.179568	0.192244	0.0443645	0.0335103	0.274632	0.105629	0.0380269		0.0105631
0.0042253	0.0485898	0.101404	0.0335103	0.0335103	0.0105631	0.128867	0.0253411	0.0335103	0.0866157	0.128867	0.0739403	0.0232386	0.145767	0.200693	0.0335103	0.0401393	0.114079	0.0676026	0.0335103		0.0169009
0.0335103	0.18168	0.0042253	0.0335103	0.0335103	0.0929534	0.0697152	0.0886926	0.0042253	0.0335103	0.124642	0.403496	0.0570401	0.0485894	0.162668	0.0042253	0.0697152	0.274632	0.0591524	0.236606		0.739388
0.0126757	0.43096	0.061265	0.0211261	0.0335103	0.0232386	0.0697152	0.0570172	0.0335103	0.0169009	0.042252	0.183793	0.0338017	0.0126757	0.090841	0.118304	0.0654902	0.27252	0.139429	0.452085		0.0190134
0.0042253	0.175343	0.0335103	0.538695	0.0335103	0.0335103	0.0105631	0.107698	0.0570401	0.0253512	0.0253514	0.0253512	0.0335103	0.107741	0.152105	0.240832	0.154217	0.0338017	0.0126757	0.232381		0.219706
0.217594	0.392934	0.352795	0.0338017	0.0591524	0.0063379	0.0295765	0.0063354	0.090841	0.0190134	0.0169009	0.0570397	0.0084505	0.48166	0.276745	0.24717	0.152105	0.289419	0.13098	0.0105631		0.0335103
0.0042253	0.0528147	0.0549274	0.0335103	0.0063379	0.061265	0.0845035	0.0147823	0.0042253	0.0126757	0.0105631	0.109854	0.0274639	0.0211261	0.217594	0.0359142	0.105629	0.0528147	0.061265	0.0760529		0.401384
0.090841	0.171118	0.0335103	0.0335103	0.0335103	0.0084505	0.0929534	0.0274529	0.308433	0.0126757	0.120417	0.0169009	0.090841	0.0169009	0.179568	0.0507022	0.0211261	0.0295765	0.0401393	0.234494		0.0401393
0.0335103	0.443635	0.124642	0.0464771	0.0335103	0.0401393	0.388709	0.0105589	0.0335103	0.0253512	0.0042253	0.0591524	0.103516	0.0147883	0.133092	0.0633774	0.268294	0.0528147	0.289421	0.24717		0.0507022
0.733059	0.420397	0.0084505	0.0274639	0.0105631	0.0485894	0.200693	0.0549053	0.042252	0.0335103	0.0169009	0.0718279	0.0084505	0.0718279	0.314771	0.0929534	0.0739403	0.0760529	0.532365	0.226044		0.204918
0.0335103	0.0654902	0.0147883	0.0359142	0.0169009	0.0335103	0.0359142	0.0335103	0.209143	0.0591524	0.061265	0.141542	0.0335103	0.0654902	0.0084505	0.0697152	0.18168	0.0335103	0.0633778	0.0507022		0.042252
0.0190134	0.204918	0.0335103	0.0992909	0.0443645	0.0464771	0.0126757	0.139374	0.0633778	0.031689	0.162668	0.0549274	0.0380269	0.202806	0.0105631	0.0676026	0.0845035	0.0929534	0.0823906	0.0380269		0.310545
0.251394	0.0443645	0.0126757	0.0190134	0.0335103	0.0335103	0.878815	0.430786	0.0359142	0.158443	0.240832	0.0190134	0.0042253	0.031689	0.192244	0.266182	0.141542	0.217594	0.126754	0.0760529		0.357021
0.293645	0.141542	0.0335103	0.0335103	0.0084505	0.0042253	0.228156	0.0823577	0.179568	0.0359142	0.0335103	0.118304	0.0335103	0.175343	0.0971787	0.152105	0.0232386	0.0549274	0.0063379	0.0084505		0.401384
0.0274639	0.0126757	0.475323	0.0335103	0.0042253	0.192243	0.0232386	0.124592	0.192244	0.0549274	0.0570401	0.133092	0.0335103	0.0591524	0.13098	0.0507022	0.0443645	0.145767	0.0042253	0.0633774		0.061265
0.642204	0.0105631	0.0063379	0.061265	0.0335103	0.0335103	0.219707	0.0844695	0.0760529	0.0338017	0.0633778	0.0042253	0.0147883	0.111967	0.0464771	0.0887282	0.219707	0.0335103	0.152105	0.0866157		0.061265
0.0335103	0.0718279	0.0335103	0.0335103	0.0063379	0.0335103	0.0697152	0.0126707	0.0335103	0.0042253	0.177455	0.103516	0.042252	0.0335103	0.0591524	0.0253512	0.13098	0.0274639	0.253507	0.124642		0.0147883
0.0211261	0.768956	0.192244	0.0335103	0.0063379	0.0042253	0.0887282	0.0950277	0.0190134	0.0507022	0.177455	0.200693	0.24717	0.107741	0.061265	0.0211261	0.278858	0.0335103	0.0335103	0.264069		0.213368
0.16478	0.371808	0.0169009	0.0633774	0.0338017	0.0335103	0.26407	0.0105589	0.291533	0.376034	0.0971787	0.382371	0.0042253	0.0591524	0.118304	0.0335103	0.0760529	0.0335103	0.0507022	0.031689		0.114079
0.48166	0.0697152	0.0335103	0.0105631	0.0274639	0.0781655	0.124642	0.141485	0.0335103	0.226044	0.0781655	0.0042253	0.0549274	0.149993	0.198581	0.0253512	0.16478	0.215481	0.0845035	0.162668		0.240832
0.116192	0.154217	0.211256	0.0253512	0.0084505	0.0335103	0.285196	0.13515	0.133092	0.0633774	0.200693	0.031689	0.031689	0.0676026	0.0359142	0.0335103	0.135205	0.139429	0.0335103	0.128867		0.0549274
0.13098	0.0084505	0.0335103	0.0443645	0.128867	0.107741	0.0443645	0.0063354	0.042252	0.0126757	0.095066	0.162668	0.105629	0.0823906	0.0485898	0.0739403	0.095066	0.452085	0.236606	0.264069		0.0528147
1.13444	0.183793	0.0335103	0.0401393	0.0335103	0.0697152	0.0147883	0.147821	0.0295765	0.095066	0.0359142	0.0380269	0.204918	0.0274639	0.15633	0.162668	0.14788	0.0507022	0.192244	0.483772		0.0654902
0.0359142	0.0929534	0.0126757	0.0335103	0.0042253	0.154217	0.0697152	0.0274529	0.0063379	0.0823906	0.308433	0.16478	0.0295765	0.128867	0.0823906	0.031689	0.141542	0.0042253	0.0274639	0.403496		0.0295765
0.249282	0.0992913	0.0335103	0.0335103	0.0335103	0.0042253	0.14788	0.0316762	0.41406	0.0464771	0.0335103	0.242944	0.0084505	0.0253512	0.384484	0.0335103	0.0335103	0.14788	0.0084505	0.0253512		0.0211261
0.120417	0.0654902	0.0335103	0.0335103	0.0063379	0.0697152	0.0654902	0.050682	0.0760529	0.0335103	0.120417	0.238719	0.0845035	0.177455	0.122529	0.0169009	0.188018	0.0507022	0.475323	0.0147883		0.149993
0.0676026	0.234494	0.0335103	0.061265	0.0084505	0.0823906	0.0823906	0.0844695	0.0042253	0.0697152	0.101404	0.221819	0.0802782	0.0633774	0.0380269	0.109854	0.0971787	0.166893	0.14788	0.0295765		0.090841
0.0335103	0.0781655	0.0485898	0.0335103	0.0063379	0.0549274	0.090841	0.0485701	0.0802782	0.0335103	0.0654902	0.101403	0.0866157	0.0335103	0.0147883	0.0401393	0.14788	0.0359142	0.0253514	0.471097		0.16478
0.207031	0.0443645	0.0042253	0.0126757	0.0335103	0.0335103	0.0335103	0.0802458	0.0335103	0.0105631	0.0971787	0.48166	0.0654902	0.152105	0.095066	0.266182	0.090841	0.0633774	0.0335103	0.0697152		0.031689
0.0232386	0.0549274	0.0335103	0.0760529	0.0335103	0.0335103	0.192244	0.0739109	0.154217	0.0126757	0.684459	0.120417	0.042252	0.0253512	0.0211261	0.0211261	0.308433	0.0739403	0.866142	0.285195		0.0147883
0.209143	0.0253514	0.0760529	0.0359142	0.0335103	0.0802782	0.0190134	0.183719	0.204918	0.185906	0.0274639	0.209143	0.253507	0.177455	0.487998	0.0528147	0.118304	0.145767	0.0802782	0.340121		0.0190134
0.0063379	0.0549274	0.0335103	0.0335103	0.0063379	0.190131	0.0084505	0.0335103	0.228156	0.031689	0.0739403	0.0126757	0.0063379	0.090841	0.0042253	0.103516	0.0929534	0.171118	0.0654902	0.0335103		0.0190134
0.15633	0.120417	0.0335103	0.0335103	0.0063379	0.0147883	0.240832	0.0126707	0.166893	0.0760529	0.0633778	0.169005	0.0845035	0.0253512	0.0335103	0.0105631	0.219707	0.238719	0.114079	0.126754		0.122529
0.160555	0.245057	0.376034	0.0335103	0.0042253	0.0401393	0.0380269	0.0105589	0.0105631	0.0335103	0.0335103	0.0335103	0.0697152	0.095066	0.0063379	0.061265	0.0654902	0.0359142	0.0654902	0.192243		0.118304
0.0042253	0.192244	0.0042253	0.278857	0.0335103	0.0507022	0.0335103	0.0042236	0.111967	0.0335103	0.0335103	0.0274639	0.0335103	0.0126757	0.101404	0.139429	0.111967	0.321108	0.354909	0.0338017		0.0190134
0.0507022	0.251394	0.143654	0.0084505	0.26407	0.0042253	0.0105631	0.0063354	0.0338017	0.118304	0.061265	0.0105631	0.126754	0.179568	0.185906	0.0105631	0.359134	0.0380269	0.0887282	0.293645		0.171118
0.0654902	0.149993	0.0211261	0.0335103	0.0063379	0.0335103	0.0633778	0.0232294	0.0335103	0.0211261	0.0739403	0.0654902	0.0126757	0.137317	0.0335103	0.0190134	0.0295765	0.0654902	0.190131	0.466872		0.230269
0.458422	0.17323	0.0335103	0.0042253	0.0063379	0.437297	0.145767	0.0335103	0.111967	0.031689	0.287308	0.149993	0.122529	0.185906	0.0169009	0.103516	0.48166	0.0126757	0.031689	0.0295765		0.242944
0.0570397	0.090841	0.0063379	0.0335103	0.0335103	0.031689	0.135205	0.0335103	0.124642	0.14788	0.0443645	0.042252	0.0253514	0.0042253	0.0335103	0.0866157	0.128867	0.0760529	0.0570401	0.109854		0.0992909
0.0335103	0.116192	0.0190134	0.0211261	0.0042253	0.0335103	0.0633778	0.0908044	0.213369	0.0335103	0.139429	0.0464771	0.0169009	0.0464771	0.268294	0.0274639	0.194356	0.223931	0.0380269	0.101403		0.221819
0.274632	0.061265	0.0084505	0.0335103	0.0042253	0.185906	0.0147883	0.447679	0.0528147	0.0676026	0.0485898	0.16478	0.0169009	0.031689	0.116192	0.105629	0.105629	0.0274639	0.240832	0.264069		0.416172
0.0084505	0.310545	0.0335103	0.0335103	0.0042253	0.0335103	0.200693	0.0168942	0.0845035	0.0042253	0.0335103	0.0887282	0.0063379	0.061265	0.0845035	0.0591524	0.0063379	0.031689	0.139429	0.0464771		0.031689
0.0274639	0.114079	0.0042253	0.549265	0.0335103	0.0335103	0.0335103	0.0380116	0.376034	0.0169009	0.0335103	0.0591524	0.0190134	0.0274639	0.0335103	0.14788	0.0802782	0.0549274	0.160555	0.542916		0.0654902
0.0335103	0.0063379	0.139429	0.0042253	0.0335103	0.0380269	0.0295765	0.0126707	0.0335103	0.27252	0.0105631	0.135205	0.107741	0.0464771	0.0295765	0.103516	0.0823906	0.0211261	0.145767	0.158443		0.0253512
0.424622	0.185906	0.312658	0.0335103	0.0335103	0.0335103	0.0485898	0.0464584	0.0633778	0.0591524	0.0253514	0.188018	0.0063379	0.0274639	0.200693	0.0335103	0.114079	0.095066	0.0190134	0.0401393		0.192243
0.0971787	0.914721	0.0105631	0.0335103	0.0335103	0.0866157	0.124642	0.0147823	0.253507	0.111967	0.0335103	0.114079	0.0211261	0.149993	0.40561	0.105629	0.171118	0.114079	0.160555	0.196468		0.0274639
0.166893	0.475322	0.143654	0.0335103	0.0335103	0.0335103	0.120417	0.0042236	0.0591524	0.221819	0.101404	0.0169009	0.0042253	0.090841	0.103516	0.141542	0.17323	0.130979	0.0781655	0.0105631		0.116192
0.0633778	0.0485898	0.0485898	0.289419	0.0335103	0.0063379	0.266182	0.0063354	0.0676026	0.0042253	0.0507022	0.0866157	0.0211261	0.0335103	0.105629	0.646443	0.0042253	0.0335103	0.0971787	0.0084505		0.0169009
0.318996	0.483773	0.204918	0.0335103	0.0335103	0.0335103	0.166893	0.0126707	0.0335103	0.0335103	0.0084505	0.0781655	0.0633778	0.139429	0.0971787	0.0335103	0.0042253	0.0591524	0.0718279	0.0676026		0.145767
0.749956	0.0654902	0.0063379	0.0335103	0.0335103	0.141542	0.0105631	0.10981	0.0335103	0.0147883	0.143654	0.0335103	0.0190134	0.0084505	0.0802782	0.0802782	0.0335103	0.158443	0.215481	0.25562		0.061265
0.0380269	0.18168	0.0126757	0.0507022	0.0335103	0.0760529	1.00133	0.0316762	0.549265	0.0338017	0.0845035	0.0042253	0.0063379	0.249282	0.0718279	0.0063379	0.111967	0.120417	0.0485898	0.0739403		0.061265
0.0126757	0.0190134	0.454197	0.0335103	0.0335103	0.0335103	0.287308	0.0316762	0.703468	0.0335103	0.0718279	0.135205	0.0335103	0.031689	0.0760529	0.0359142	0.135205	0.0528147	0.0211261	0.504897		0.0697152
0.31477	0.418284	0.0335103	0.633764	0.0063379	0.0042253	0.133092	0.0063354	0.0232386	0.135205	0.0443645	0.0190134	0.0105631	0.0992909	0.0380269	0.0211261	0.0190134	0.29787	0.128867	0.109854		0.304207
0.0063379	0.342233	0.0335103	0.0253512	0.0335103	0.0335103	0.682358	0.0274529	0.0654902	0.0295765	0.17323	0.202806	0.196469	0.0464771	0.771069	0.0190134	0.143654	0.291532	0.118304	0.0866157		0.166893
0.13098	0.139429	0.0335103	0.0335103	0.0335103	0.116192	0.0105631	0.0335103	0.0802782	0.141542	0.183793	0.0126757	0.0253514	0.0760529	0.0802782	0.0042253	0.114079	0.0443645	0.0697152	0.0929534		0.0802782
0.0190134	0.139429	0.17323	0.0253512	0.0063379	0.0063379	0.118304	0.0147823	0.0063379	0.0697152	0.090841	0.16478	0.0126757	0.0887282	0.331671	0.0633774	0.0105631	0.111967	0.111967	0.242944		0.0042253
0.0971787	0.0992913	0.0335103	0.0335103	0.0190134	0.0063379	0.0335103	0.143597	0.0929534	0.128867	0.095066	0.0929534	0.0528147	0.194356	0.0335103	0.0335103	0.0126757	0.118304	0.0633778	0.031689		0.0929534
0.0359142	0.0992913	0.0335103	0.487998	0.589402	0.0105631	0.0887282	0.0335103	0.0718279	0.0507022	0.171118	0.0464771	0.0697152	0.0335103	0.709818	0.0190134	0.346458	0.095066	0.0760529	0.0464771		0.0211261
0.031689	0.209143	0.0274639	0.0335103	0.0169009	0.0063379	0.141542	0.0335103	0.295758	0.276744	0.061265	0.0335103	0.0338017	0.0676026	0.143654	0.0042253	0.0443645	0.190131	0.101404	0.0338017		0.0274639
0.0549274	0.0401393	0.0335103	0.0335103	0.363359	0.0507022	0.126754	0.242847	0.0190134	0.0335103	0.378147	0.0697152	0.152105	0.0335103	0.090841	0.0570397	0.124642	0.090841	0.0549274	0.0676026		0.130979
0.152105	0.0507022	0.0739403	0.0335103	0.0335103	0.0443645	0.0549274	0.304086	0.0335103	0.084503	0.0549274	0.0335103	0.16478	0.0335103	0.171118	0.0359142	0.135205	0.111967	0.0084505	0.0063379		0.154217
0.0042253	0.105629	0.0335103	0.0335103	0.0042253	0.251394	0.422509	0.0549053	0.0084505	0.0802782	0.126754	0.105629	0.128867	0.0570397	0.0338017	0.128867	0.0295765	0.0169009	0.219707	0.211256		0.109854
0.215481	0.0042253	0.0335103	0.0335103	0.0063379	0.0147883	0.24717	0.13515	0.0063379	0.135205	0.0676026	0.0823906	0.0295765	0.0802782	0.0126757	0.219706	0.0335103	0.369696	0.213369	0.122529		0.177455
0.190131	0.143654	0.0042253	0.0335103	0.0591524	0.18168	0.226044	0.407558	0.0084505	0.0823906	0.0887282	0.0929534	0.0443645	0.0147883	0.0485898	0.0042253	0.101404	0.304207	0.16478	0.130979		0.0464771
0.0570397	0.25562	0.238719	0.0335103	0.0335103	0.0401393	0.274632	0.0992515	0.0084505	0.109854	0.0190134	0.042252	0.120417	0.34857	0.0443645	0.122529	0.0335103	0.0507022	0.0335103	0.042252		0.0823906
0.316883	0.380258	0.0335103	0.0335103	0.0335103	0.105629	0.0929534	0.331538	0.0335103	0.0169009	0.0507022	0.0760529	0.0549274	0.264069	0.0338017	0.090841	0.16478	0.0335103	0.0126757	0.783743		0.109854
0.143654	0.0190134	0.0042253	0.0335103	0.0335103	0.198581	0.111967	0.0042236	0.0464771	0.0781655	0.331671	0.0507022	0.0253514	0.0823906	0.0232386	0.120417	0.0338017	0.215481	0.589402	0.321108		0.122529
0.0147883	0.0549274	0.095066	0.0042253	0.0335103	0.0211261	0.15633	0.0190059	0.333783	0.422509	0.0570401	0.031689	0.166893	0.0147883	0.0042253	0.158443	0.0485898	0.0274639	0.0126757	0.0126757		0.118304
0.836561	0.0063379	0.111967	0.133092	0.0335103	0.0633774	0.0063379	0.0168942	0.648542	0.0401393	0.0190134	0.0084505	0.0507022	0.0929534	0.0042253	0.139429	0.0105631	0.152105	0.0147883	0.183793		0.226044
0.0169009	0.0781655	0.0570397	0.0335103	0.0042253	0.0126757	0.0190134	0.0335103	0.175343	0.0084505	0.0335103	0.0232386	0.553492	0.135205	0.0335103	0.0929534	0.042252	0.18168	0.511236	0.0359142		0.101403
0.0042253	0.0971787	0.0335103	0.0335103	0.0084505	0.62531	0.0232386	0.0253411	0.304208	0.0105631	0.0295765	0.0190134	0.0823906	0.0335103	0.0760529	0.221819	0.354909	0.122529	0.821772	0.0591524		0.291532
0.042252	0.984434	0.365471	0.0335103	0.0335103	0.386596	0.0633778	0.515254	0.101404	0.249282	0.0359142	0.0169009	0.0570401	0.135205	0.114079	0.416172	0.0823906	0.198581	0.188018	0.0042253		0.0295765
0.215481	0.0971787	0.0190134	0.0063379	0.0042253	0.0359142	1.75129	0.0443466	0.0887282	0.0147883	0.0335103	0.190131	0.0335103	0.122529	0.0929534	0.0274639	0.0211261	0.226044	0.418285	0.34857		0.0253512
0.0042253	0.0866157	0.0335103	0.0633774	0.0335103	0.0335103	0.0570401	0.101363	0.126754	0.0063379	0.0063379	0.0570397	0.0338017	0.232381	0.0359142	0.0676026	0.0549274	0.209143	0.209143	0.103516		0.211256
0.152105	0.031689	0.0253514	0.0335103	0.0335103	0.0190134	0.0845035	0.367436	0.133092	0.0528147	0.042252	0.213368	0.0718279	0.215481	0.221819	0.0359142	0.321108	0.135205	0.492223	0.291532		0.0823906
0.0335103	0.13098	0.17323	0.0335103	0.0335103	0.0232386	0.0781655	0.124592	0.0338017	0.0887282	0.107741	0.0338017	0.0464771	0.0929534	0.0676026	0.0211261	0.0211261	0.0528147	0.17323	0.392934		0.0591524
0.0335103	0.0042253	0.0335103	0.0335103	0.0335103	0.27252	0.0338017	0.0295647	0.0760529	0.031689	0.202806	0.0126757	0.0190134	0.0760529	0.308433	0.0042253	0.177455	0.175343	0.107741	0.0443645		0.0338017
0.0335103	0.0380269	0.0335103	0.0422517	0.0084505	0.158443	0.0169009	0.0549053	0.424622	0.084503	0.154217	0.0190134	0.0633778	0.031689	0.0570401	0.0335103	0.0295765	0.223931	0.126754	0.0380269		0.213368
0.386597	0.0971787	0.0335103	0.0335103	0.0676026	0.0084505	0.0676026	0.0335103	0.0335103	0.0866157	0.120417	0.128867	0.120417	0.0335103	0.0253514	0.154217	0.0380269	0.0443645	0.0464771	0.18168		0.0105631
0.0335103	0.403497	0.0335103	0.530255	0.0063379	0.0105631	0.0570401	0.050682	0.0335103	0.171118	0.031689	0.101403	0.0697152	0.0676026	0.43096	0.0549274	0.369697	0.042252	0.64433	0.0335103		0.0335103
0.0335103	0.0338017	0.109854	0.0335103	0.0190134	0.0359142	0.042252	0.0147823	0.0464771	0.0528147	0.0823906	0.114079	0.0335103	0.0971787	0.259844	0.0549274	0.232381	0.0335103	0.0274639	0.149993		0.169005
0.0335103	0.0295765	0.0335103	0.0528147	0.0042253	0.0528147	0.257732	0.0316762	0.0335103	0.084503	0.0443645	0.253506	0.0295765	0.0126757	0.0063379	0.0126757	0.116192	0.0401393	0.0063379	0.171118		0.0633774
0.0633778	0.190131	0.0549274	0.0042253	0.0084505	0.0105631	0.126754	0.0335103	0.240832	0.0335103	0.0739403	0.0169009	0.0654902	0.0232386	0.0084505	0.105629	0.0971787	0.289419	0.692907	0.0718279		0.538695
0.128867	0.249282	0.0335103	0.0042253	0.0335103	0.0232386	0.0126757	0.0295647	0.0335103	0.0992909	0.0697152	0.0295765	0.0084505	0.232381	0.211256	0.420397	0.0718279	0.276744	0.185906	0.162668		0.0401393
0.0335103	0.0401393	0.0335103	0.0335103	0.0335103	0.0802782	0.0464771	0.0549053	0.0190134	0.122529	0.13098	0.103516	0.0295765	0.0147883	0.0971787	0.0591524	0.145767	0.192243	0.424622	0.0929534		0.0335103
0.17323	0.18168	0.0042253	0.0042253	0.0042253	0.595731	0.042252	0.0335103	0.0971787	0.0335103	0.0654902	0.14788	0.0485898	0.0549274	0.0485898	0.0253512	0.042252	0.0338017	0.268294	0.0992909		0.0335103
0.0042253	0.0105631	0.0335103	0.0063379	0.0335103	0.0335103	0.26407	0.0760225	0.226044	0.0802782	0.0718279	0.494335	0.095066	0.209143	0.109854	0.194356	0.640101	0.0253512	0.0676026	0.0929534		0.0676026
0.0232386	0.103516	0.0335103	0.221819	0.0335103	0.0718279	0.0633778	0.0295647	0.0232386	0.0802782	0.0739403	0.031689	0.0335103	0.0380269	0.0676026	0.130979	0.0084505	0.240832	0.346458	0.238719		0.0971787
0.0380269	0.0443645	0.251394	0.0422517	0.0274639	0.0190134	0.0443645	0.0084472	0.042252	0.204918	0.042252	0.295757	0.135205	0.090841	0.111967	0.0335103	0.312658	0.177455	0.0084505	0.061265		0.0823906
0.0971787	0.0866157	0.0335103	0.0335103	0.0335103	0.0169009	0.0528147	0.0335103	0.0697152	0.0338017	0.145767	0.285195	0.0335103	0.0443645	0.0485898	0.287308	0.219707	0.0464771	0.0633778	0.0633774		0.204918
0.756281	0.0802782	0.0126757	0.0338017	0.777409	0.0042253	0.0549274	0.0168942	0.0295765	0.0654902	0.105629	0.0823906	0.0042253	0.0654902	0.0169009	0.141542	0.0633778	0.0887282	0.280971	0.133092		0.221819
0.190131	0.504897	0.0335103	0.0654902	0.0042253	0.0105631	0.137317	0.0335103	0.137317	0.143654	0.198581	0.084503	0.0335103	0.0105631	0.107741	0.111967	0.095066	0.0823906	0.327445	0.204918		0.318996
0.0823906	0.221819	0.0335103	0.0335103	0.0335103	0.0084505	0.580943	0.0168942	0.0274639	0.090841	0.26407	0.0570397	0.0042253	0.0232386	0.0063379	0.0335103	0.0190134	0.0485894	0.190131	0.107741		0.122529
0.0570397	0.042252	0.0042253	0.0105631	0.0335103	0.0338017	0.177455	0.0042236	0.276745	0.0485894	0.0063379	0.18168	0.107741	0.0570397	0.0528147	0.0063379	0.18168	0.0253512	0.0335103	0.0549274		0.204918
0.135205	0.154217	0.0335103	0.120417	0.0042253	0.0063379	0.207031	0.0358998	0.0042253	0.0676026	0.0570401	0.0929534	0.0063379	0.0359142	0.0335103	0.236606	0.0147883	0.160555	0.268294	0.114079		0.287308
0.169005	0.606304	0.0042253	0.0295765	0.0042253	0.0063379	0.340121	0.0335103	0.149993	0.0084505	0.0042253	0.299982	0.0718279	0.0084505	0.0823906	0.0105631	0.0739403	0.196468	0.435185	0.084503		0.0781655
0.0802782	0.111967	0.101404	0.0570397	0.0169009	0.0190134	0.0887282	0.0335103	0.0335103	0.0253512	0.133092	0.0359142	0.0335103	0.0401393	0.0443645	0.118304	0.124642	0.162668	0.0464771	0.0105631		0.219706
0.223931	0.0739403	0.0335103	0.0084505	0.0063379	0.0084505	0.166893	0.0335103	0.293645	0.0338017	0.27252	0.0507022	0.0211261	0.0654902	0.411948	0.0760529	0.0654902	0.095066	0.0063379	0.0443645		0.114079
0.114079	0.0507022	0.0335103	0.0105631	0.0274639	0.0335103	0.0063379	0.166826	0.101404	0.0971787	0.0443645	0.107741	0.0549274	0.126754	0.190131	0.090841	0.0147883	0.0781655	0.253507	0.0443645		0.160555
0.0823906	0.042252	0.0335103	0.0485894	0.0063379	0.0063379	0.118304	0.111922	0.14788	0.0253512	0.0084505	0.0335103	0.230269	0.116192	0.162668	0.0126757	0.274632	0.0528147	0.0802782	0.289419		0.0866157
0.175343	0.084503	0.0335103	0.0781655	0.0169009	0.109854	0.0335103	0.187943	0.0528147	0.0211261	0.0042253	0.0063379	0.0549274	0.0105631	0.152105	0.0570397	0.0823906	0.0971787	0.126754	0.0464771		0.238719
0.0359142	0.329558	0.0063379	0.177455	0.0443645	0.0042253	0.219707	0.639849	0.0042253	0.0633774	0.0335103	0.0697152	0.126754	0.0718279	0.0380269	0.0866157	0.0443645	0.0380269	0.0718279	0.226044		0.0401393
0.179568	0.169005	0.0335103	0.0335103	0.0335103	0.0335103	0.0335103	0.114033	0.0823906	0.0232386	0.386597	0.15633	0.0359142	0.042252	0.211256	0.0549274	0.230269	0.116192	0.0464771	0.103516		0.0335103
0.756281	0.280969	0.0335103	0.0464771	0.0063379	0.555598	0.0335103	0.0443466	0.0401393	0.211256	0.386597	0.384484	0.0443645	0.433071	0.0507022	0.221819	0.0232386	0.0335103	0.270407	0.0147883		0.464759
0.137317	0.276745	0.0105631	0.0274639	0.0335103	0.0401393	0.0697152	0.521589	0.0823906	0.0084505	0.0359142	0.395046	0.0042253	0.171118	0.0274639	0.084503	0.0063379	0.0295765	0.0211261	0.0063379		0.0591524
0.84291	0.154217	0.0335103	0.0464771	0.0084505	0.0507022	0.14788	0.0401232	0.295758	0.109854	0.359134	0.371808	0.0485898	0.278857	0.287308	0.143654	0.122529	0.240832	0.0042253	0.0485894		0.32322
0.0335103	0.122529	0.0739403	0.0335103	0.0335103	0.0401393	0.0739403	0.050682	0.426734	0.209143	0.0335103	0.0253512	0.0211261	0.0338017	0.213369	0.0335103	0.0570401	0.287308	0.118304	0.152105		0.270407
0.16478	0.137317	0.0335103	0.0380269	0.188018	0.0335103	0.0335103	0.160491	0.0063379	0.194356	0.152105	0.25562	0.139429	0.116192	0.242945	0.0739403	0.0739403	0.0528147	0.280971	0.084503		0.449971
0.185906	0.090841	0.0335103	0.0380269	0.0063379	0.0042253	0.114079	0.0042236	0.513347	0.18168	0.0464771	0.116192	0.0190134	0.0929534	0.335896	0.042252	0.0718279	0.618966	0.120417	0.0485894		0.190131
0.101404	0.0295765	0.0335103	0.0169009	0.0253514	0.0401393	0.308433	0.0211176	0.0335103	0.0335103	0.0591524	0.0992909	0.13098	0.188018	0.190131	0.0887282	0.13098	0.0232386	0.0295765	0.0253512		0.0335103
0.158443	0.166893	0.0335103	0.0443645	0.452085	0.145767	0.0335103	0.0443466	0.0147883	0.0739403	0.0929534	0.0042253	0.152105	0.0676026	0.0338017	0.0126757	0.183793	0.0274639	0.0549274	0.158443		0.0169009
0.109854	0.378147	0.0335103	0.149993	0.0042253	0.101403	0.0528147	0.0654639	0.0335103	0.0253512	0.0528147	0.316883	0.0802782	0.0739403	0.0042253	0.124642	0.13098	0.0591524	0.061265	0.285195		0.0929534
0.0335103	0.0126757	0.0335103	0.0591524	0.0105631	0.0802782	0.061265	0.0316762	0.0211261	0.109854	0.101404	0.171118	0.105629	0.031689	0.185906	0.0992909	0.261957	0.042252	0.0633778	0.109854		0.185906
0.0211261	0.0443645	0.0084505	0.0335103	0.0084505	0.0253512	0.249282	0.0042236	0.0401393	0.133092	0.162668	0.198581	0.0485898	0.0042253	0.0507022	0.101403	0.143654	0.0232386	0.198581	0.152105		0.0528147
0.141542	0.0042253	0.0063379	0.0335103	0.0335103	0.0084505	0.169005	0.0063354	0.0042253	0.0042253	0.0802782	0.0335103	0.133092	0.0718279	0.0866157	0.0591524	0.103516	0.266182	0.166893	0.56193		0.137317
0.152105	0.0739403	0.0335103	0.0654902	0.0042253	0.0211261	0.0253514	0.050682	0.0676026	0.0295765	0.0063379	0.0335103	0.0126757	0.287308	0.0190134	0.0338017	0.0335103	0.228156	0.0380269	0.257732		0.0781655
0.0105631	0.521797	0.209143	0.0335103	0.18168	0.0253512	0.166893	0.10981	0.160555	0.0971787	0.0335103	0.0802782	0.101404	0.0633774	0.0211261	0.0760529	0.0063379	0.0802782	0.0739403	0.0866157		0.105629
0.137317	0.13098	0.0335103	0.0042253	0.0126757	0.0295765	0.0338017	0.0992515	0.188018	0.18168	0.0338017	0.0464771	0.124642	0.365471	0.0335103	0.149993	0.0443645	0.126754	0.090841	0.0126757		0.0274639
0.0760529	0.509122	0.0042253	0.690807	0.0335103	0.188018	0.0042253	0.0401232	0.213369	0.0190134	0.0063379	0.0211261	0.0190134	0.0570397	0.0338017	0.141542	0.0507022	0.352795	0.0042253	0.285195		0.217594
0.221819	0.0084505	0.0335103	0.0147883	0.0335103	0.0335103	0.616861	0.0739109	0.0676026	0.0866157	0.031689	0.257732	0.031689	0.340121	0.0253514	0.0760529	0.0063379	0.0105631	0.0105631	0.0528147		0.0335103
0.158443	0.0823906	0.0335103	0.0335103	0.0335103	0.0042253	0.447861	0.289304	0.166893	0.0887282	0.0992913	0.0676026	0.090841	0.116192	0.0274639	0.179568	0.031689	0.160555	0.137317	0.118304		0.0335103
0.124642	0.43096	0.0335103	0.0335103	0.0335103	0.111967	0.0105631	0.523693	0.0126757	0.0739403	0.0971787	0.0211261	0.0380269	0.0084505	0.0335103	0.363359	0.0760529	0.0338017	0.219707	0.128867		0.0697152
0.0063379	0.0823906	0.0335103	0.0253512	0.0335103	0.109854	0.198581	0.063352	0.219707	0.0443645	0.245057	0.0507022	0.042252	0.0042253	0.0126757	0.179568	0.0274639	0.466872	0.0591524	0.0253512		0.061265
0.0528147	0.109854	0.376034	0.0335103	0.0335103	0.40561	0.0443645	0.0380116	0.120417	0.0105631	0.15633	0.0507022	0.0718279	0.34857	0.0335103	0.213368	0.160555	0.162668	0.0063379	0.0676026		0.0211261
0.378147	0.141542	0.0042253	0.0253512	0.0335103	0.0274639	0.304208	0.25974	0.0760529	0.0190134	0.116192	0.0591524	0.0253514	0.0697152	0.0718279	0.0739403	0.0105631	0.0549274	0.0380269	0.198581		0.293645
0.114079	0.0718279	0.0335103	0.0335103	0.0335103	0.0718279	0.0591524	0.0865812	0.126754	0.031689	0.0190134	0.107741	0.0335103	0.0084505	0.0274639	0.0760529	0.0335103	0.137317	0.0570401	0.0211261		0.249282
0.0126757	0.0971787	0.0042253	0.0147883	0.0654902	0.198581	0.304208	0.0168942	0.0485898	0.0549274	0.0760529	0.0443645	0.107741	0.126754	0.169005	0.105629	0.0401393	0.359134	0.0866157	0.0335103		0.0633774
0.0042253	0.24717	0.0335103	0.0253512	0.266182	0.0443645	0.0866157	0.0232294	0.149993	0.0338017	0.0338017	0.15633	0.0042253	0.0335103	0.179568	0.103516	0.0253514	0.0169009	0.268294	0.0335103		0.128867
0.576728	0.0760529	0.0992913	1.04991	0.0295765	0.15633	0.0654902	0.0274529	0.0042253	0.0739403	0.0335103	0.042252	0.0335103	0.0654902	0.124642	0.0147883	0.042252	0.318996	0.128867	0.899946		0.0802782
0.0335103	0.111967	0.0335103	0.0802782	0.0042253	0.0169009	0.090841	0.0168942	0.149993	0.0887282	0.0335103	0.0654902	0.0335103	0.245057	0.183793	0.103516	0.0169009	0.0338017	0.118304	0.084503		0.0485894
0.302095	0.133092	0.139429	0.0335103	0.0042253	0.0823906	0.0697152	0.0844695	0.0147883	0.0105631	0.0042253	0.031689	0.0845035	0.179568	0.0929534	0.145767	0.0084505	0.557709	0.386597	0.249282		0.0042253
0.0335103	0.139429	0.0335103	0.0697152	0.0866157	0.342233	0.0063379	0.0549053	0.0335103	0.0338017	0.124642	0.0338017	0.0845035	0.188018	0.149993	0.130979	0.0084505	0.194356	0.13098	0.0760529		0.145767
0.0042253	0.0992913	0.0042253	0.0295765	0.0359142	0.101403	0.190131	0.0443466	0.0443645	0.287308	0.0802782	0.0147883	0.061265	0.0147883	0.204918	0.211256	0.090841	0.116192	0.0380269	0.321108		0.0823906
0.0654902	0.145767	0.0335103	0.194356	0.0633778	0.0380269	0.166893	0.0042236	0.0211261	0.061265	0.0190134	0.0485894	0.0485898	0.158443	0.042252	0.120417	0.13098	0.24717	0.095066	0.213368		0.207031
0.530255	0.215481	0.0338017	0.462647	0.0464771	0.0335103	0.0781655	0.0316762	0.0190134	0.0823906	0.194356	0.0295765	0.0063379	0.0335103	0.0084505	0.0338017	0.409835	0.15633	0.137317	0.0126757		0.0528147
0.276745	0.15633	0.0335103	0.0335103	0.0335103	0.0335103	0.207031	0.0591289	0.0126757	0.0338017	0.0971787	0.0232386	0.0126757	0.0211261	0.306321	0.0169009	0.0570401	0.752054	0.426734	0.0335103		0.211256
0.114079	0.0992913	0.0335103	0.0380269	0.109854	0.219706	0.141542	0.0316762	0.0401393	0.0633774	0.090841	0.0295765	0.0105631	0.0335103	0.160555	0.0929534	0.0084505	0.061265	0.468985	0.109854		0.149993
0.285195	0.0295765	0.0335103	0.0084505	0.0105631	0.0295765	0.031689	0.0717991	0.124642	0.0169009	0.0485898	0.042252	0.433073	0.0654902	0.0190134	0.676006	0.0654902	0.139429	0.0633778	0.257732		0.0760529
0.0335103	0.0443645	0.0335103	0.0105631	0.0739403	0.215481	0.213369	0.0335103	0.0274639	0.0063379	0.042252	0.0147883	0.0335103	0.095066	0.0781655	0.226044	0.0147883	0.0359142	0.109854	0.0570397		0.0380269
0.111967	0.084503	0.0063379	0.0338017	0.0042253	0.158443	0.0464771	0.0274529	0.0105631	0.0676026	0.0335103	0.0063379	0.0190134	0.031689	0.103516	0.084503	0.0063379	0.0190134	0.0971787	0.185906		0.152105
0.0485898	0.107741	0.0335103	0.0335103	0.0335103	0.0781655	0.120417	0.111922	0.0549274	0.0084505	0.031689	0.0105631	0.0335103	0.0335103	0.169005	0.204918	0.0802782	0.105629	0.101404	0.0739403		0.0338017
0.200693	0.454197	0.0866157	1.09218	0.0335103	0.133092	0.135205	0.162603	0.0274639	0.0063379	0.0823906	0.0147883	0.0335103	0.0802782	0.0338017	0.15633	0.0507022	0.042252	0.0105631	0.145767		0.0147883
0.0760529	0.0359142	0.0335103	0.0591524	0.0335103	0.0232386	0.0528147	0.238623	0.0359142	0.0274639	0.0211261	0.0169009	0.0190134	0.0042253	0.0295765	0.139429	0.0929534	0.0549274	0.211256	0.160555		0.107741
0.137317	0.0697152	0.0147883	0.0105631	0.0335103	0.0211261	0.0802782	0.118257	0.0443645	0.0295765	0.0169009	0.0295765	0.0211261	0.204918	0.509124	0.29787	0.0464771	0.0338017	0.0335103	0.0190134		0.0253512
0.437297	0.139429	0.0335103	0.0295765	0.0335103	0.0274639	0.090841	0.0253411	0.128867	0.0760529	0.0335103	0.0084505	0.0042253	0.0929534	0.135205	0.0335103	0.0380269	0.261957	0.0042253	0.0295765		0.0464771
0.0464771	0.285195	0.0084505	0.0335103	0.0335103	0.0335103	0.0549274	0.0042236	0.0781655	0.0335103	0.0528147	0.0084505	0.0105631	0.0464771	0.149993	0.209143	0.249282	0.0992909	0.0335103	0.190131		0.0335103
0.107741	1.01824	0.0335103	0.0084505	0.0042253	0.101403	0.0063379	0.0971394	0.230269	0.0760529	0.0190134	0.221819	0.105629	0.107741	0.0823906	0.169005	0.0084505	0.0338017	0.0929534	0.0570397		0.0232386
0.0335103	0.135205	0.0335103	0.0335103	0.196469	0.232381	0.0887282	0.0844695	0.0401393	0.0335103	0.0335103	0.166893	0.0084505	0.0697152	0.0126757	0.0633774	0.105629	0.0211261	0.061265	0.042252		0.0232386
0.0401393	0.061265	0.109854	0.120417	0.0063379	0.0739403	0.0845035	0.120368	0.0190134	0.0169009	0.0147883	0.403496	0.0147883	0.0147883	0.0295765	0.47321	0.392934	0.0335103	0.0335103	0.238719		0.0063379
0.090841	0.299982	0.0042253	0.0335103	0.0253514	0.084503	0.107741	0.204836	0.160555	0.0591524	0.249282	0.51546	0.0570401	0.0105631	0.0718279	0.0591524	0.0042253	0.0359142	0.0335103	0.109854		0.0464771
0.0380269	0.462647	0.0335103	0.0042253	0.0676026	0.0084505	0.0823906	0.0211176	0.0887282	0.0335103	0.0253514	0.105629	0.042252	0.0105631	0.365471	0.312658	0.568276	0.785862	0.162668	0.0802782		0.0335103
0.0084505	0.238719	0.0042253	0.0335103	0.0335103	0.0760529	0.175343	0.0335103	0.523913	0.061265	0.194356	0.0401393	0.0335103	0.0105631	0.0253514	0.107741	0.0335103	0.130979	0.0211261	0.0443645		0.0335103
0.0190134	0.0676026	0.0718279	0.0335103	0.0335103	0.0971787	0.207031	0.0335103	0.0739403	0.0335103	0.0718279	0.114079	0.0042253	0.0126757	0.266182	0.179568	0.090841	0.555598	0.15633	0.0464771		0.149993
0.196468	0.388709	0.0042253	0.0335103	0.0042253	0.0042253	0.090841	0.0105589	0.061265	0.158443	0.0253514	0.122529	0.0443645	0.0084505	0.445748	0.141542	0.0887282	0.523913	0.160555	0.198581		0.532365
0.0654902	0.302095	0.0464771	0.0063379	0.0549274	0.0295765	0.0335103	0.0358998	0.17323	0.0570397	0.109854	0.141542	0.0887282	0.0335103	0.0274639	0.0971787	0.0971787	0.139429	0.183793	0.0570397		0.190131
0.0401393	0.0992913	0.0335103	0.0335103	0.031689	0.0335103	0.0591524	0.0126707	0.211256	0.158443	0.0739403	0.0633774	0.13098	0.0147883	0.278858	0.122529	0.0380269	0.0718279	0.0633778	0.0718279		0.0823906
0.126754	0.0485898	0.280969	0.245057	0.0232386	0.0063379	0.53448	0.0380116	0.266182	0.0105631	0.0126757	0.169005	0.0401393	0.0274639	0.179568	0.0211261	0.143654	0.245057	0.175343	0.105629		0.276744
0.111967	0.179568	0.0335103	0.0335103	0.0335103	0.0126757	0.62531	0.111922	0.213369	0.0335103	0.0887282	0.175343	0.0190134	0.0335103	0.13098	0.0380269	0.0507022	0.141542	0.14788	0.116192		0.0063379
0.443635	0.583067	0.234494	0.0042253	0.061265	0.0063379	0.103516	0.0295647	0.276745	0.0335103	0.0823906	0.0633774	0.0126757	0.0654902	0.111967	0.0633774	0.0929534	0.0232386	0.0633778	0.0335103		0.0633774
0.158443	0.0591524	0.0401393	0.0335103	0.0335103	0.0335103	0.0887282	0.236512	0.103516	0.0718279	0.0335103	0.0633774	0.0105631	0.0335103	0.149993	0.031689	0.475323	0.0042253	0.109854	0.0739403		0.114079
0.196468	0.0887282	0.0063379	0.0335103	0.0335103	0.62531	0.0042253	0.130927	0.166893	0.061265	0.0676026	0.0528147	0.196469	0.0084505	0.0654902	0.111967	0.0654902	0.122529	0.0528147	0.152105		0.169005
0.0549274	0.090841	0.0147883	0.0147883	0.0335103	0.14788	0.0042253	0.0612406	0.0380269	0.0211261	0.316883	0.0253512	0.274632	0.0971787	0.407722	0.135205	0.118304	0.0971787	0.18168	0.249282		0.198581
0.211256	0.141542	0.0042253	0.0335103	0.090841	0.0676026	0.0335103	0.179496	0.0570401	0.830222	0.158443	0.0781655	0.0190134	0.190131	0.190131	0.0718279	0.061265	0.103516	0.031689	0.0760529		0.126754
0.0335103	0.0697152	0.0335103	0.0169009	0.519686	0.0591524	0.0105631	0.0084472	0.0147883	0.0335103	0.0654902	0.175343	0.0147883	0.251394	0.133092	0.0697152	0.0739403	0.154217	0.0169009	0.0718279		0.192243
0.031689	0.0335103	0.042252	0.0335103	0.0042253	0.0507022	0.0335103	0.0886926	0.0359142	0.031689	0.0591524	0.141542	0.0042253	0.464759	0.031689	0.245057	0.0866157	0.192243	0.234494	0.188018		0.513347
0.513347	0.264069	0.0335103	0.0335103	0.0084505	0.0126757	0.0042253	0.0335103	0.0802782	0.0802782	0.160555	0.18168	0.0992913	0.0992909	0.0295765	0.0866157	0.0335103	0.0042253	0.141542	0.211256		0.084503
0.124642	0.0802782	0.0760529	0.0507022	0.133092	0.0232386	0.0063379	0.0612406	0.090841	0.0253512	0.0570401	0.0929534	0.0802782	0.137317	0.321108	0.124642	0.0147883	0.128867	0.0887282	0.0570397		0.0042253
0.0063379	0.175343	0.0335103	0.0335103	0.0335103	0.0338017	0.0335103	0.042235	0.095066	0.0063379	0.042252	0.160555	0.0359142	0.149993	0.0359142	0.0042253	0.0042253	0.0335103	0.745733	0.0042253		0.0401393
0.095066	0.0739403	0.0126757	0.0507022	0.0335103	0.30632	0.169005	0.0147823	0.0169009	0.0676026	0.128867	0.0528147	0.095066	0.0443645	0.0591524	0.0274639	0.340121	0.109854	0.0992913	0.107741		0.0443645
0.0084505	0.0485898	0.158443	0.0335103	0.0169009	0.0147883	0.0401393	0.0084472	0.042252	0.0211261	0.0992913	0.175343	0.160555	0.0464771	0.0528147	0.0507022	0.0042253	0.120417	0.0676026	0.0126757		0.0992909
0.32322	0.283083	0.0190134	0.0380269	0.0823906	0.0335103	0.0335103	0.0549053	0.095066	0.0253512	0.0253514	0.15633	0.0633778	0.137317	0.16478	0.0760529	0.0084505	0.891498	0.0338017	0.177455		0.171118
0.185906	0.204918	0.0335103	0.0335103	0.0063379	0.261957	0.154217	0.0380116	0.0335103	0.16478	0.042252	0.18168	0.0380269	0.0335103	0.0169009	0.0063379	0.268294	0.0528147	0.270407	0.0169009		0.0443645
0.0335103	0.479548	0.0887282	0.061265	0.114079	0.0295765	0.0253514	0.0358998	0.0335103	0.103516	0.0274639	0.179568	0.0781655	0.114079	0.0528147	0.27252	0.348571	0.031689	0.171118	0.51546		0.0105631
0.299982	0.0485898	0.0528147	0.0971787	0.0335103	0.114079	0.0654902	0.399111	0.0335103	0.0485894	0.128867	0.443635	0.0549274	0.137317	0.0084505	0.0992909	0.0232386	0.101403	0.109854	0.0105631		0.111967
0.0042253	0.316883	0.0063379	0.0335103	0.0335103	0.0335103	0.202806	0.13515	0.312658	0.152105	0.122529	0.0042253	0.777409	0.278857	0.13098	0.0887282	0.149993	0.124642	0.0232386	0.0443645		0.0126757
0.384484	0.0866157	0.0335103	0.0295765	0.152105	0.169005	0.0295765	0.0147823	0.14788	0.0042253	0.621094	0.0380269	0.14788	0.0570397	0.0335103	0.0335103	0.240832	0.145767	0.031689	0.0042253		0.0274639
0.095066	0.0549274	0.0335103	0.0335103	0.0335103	0.437297	0.0401393	0.0760225	0.0866157	0.0335103	0.0401393	0.0380269	0.0507022	0.0232386	0.0126757	0.0528147	0.0338017	0.084503	0.0169009	0.302095		0.0781655
0.0042253	0.283083	0.0042253	0.0335103	0.0335103	0.126754	0.0549274	0.0335103	0.114079	0.0126757	0.116192	0.0211261	0.101404	0.0169009	0.0443645	0.25562	0.0042253	0.116192	0.0485898	0.754175		0.031689
0.061265	0.101404	0.0042253	0.0335103	0.0335103	0.0507022	0.0190134	0.0105589	0.0528147	0.278857	0.135205	0.042252	0.232381	0.0760529	0.0042253	0.116192	0.395046	0.223931	0.137317	0.120417		0.0359142
0.0335103	0.0676026	0.215481	0.278857	0.0105631	0.0401393	0.133092	0.0485701	0.162668	0.16478	0.0781655	0.0760529	0.230269	0.0335103	0.204918	0.589402	0.0443645	0.0781655	0.137317	0.532365		0.0443645
0.0063379	0.149993	0.0105631	0.0335103	0.0359142	0.0190134	0.042252	0.0675757	0.0992913	0.0169009	0.111967	0.211256	0.0760529	0.0274639	0.0992913	0.031689	0.0845035	0.0335103	0.0401393	0.105629		0.0211261
0.266182	0.0335103	0.0335103	0.0335103	0.0335103	0.0887282	0.0464771	0.0401232	0.737274	0.0485894	0.0887282	0.109854	0.0063379	0.061265	0.564056	0.095066	0.101404	0.042252	0.232381	0.29787		0.0697152
0.143654	0.166893	0.0335103	0.0549274	0.0335103	0.0401393	0.0676026	0.0105589	0.0971787	0.342233	0.0335103	0.0211261	0.143654	0.278857	0.169005	0.299982	0.0570401	0.0359142	0.0401393	0.0887282		0.0992909
0.902044	0.439409	0.0335103	0.0253512	0.0335103	0.031689	0.18168	0.0190059	0.0591524	0.0084505	0.0042253	0.126754	0.111967	0.0084505	0.226044	0.0401393	0.0335103	0.124642	0.253507	0.0335103		0.0570397
0.0063379	0.207031	0.0169009	0.0485894	0.0335103	0.0507022	0.0335103	0.0443466	0.120417	0.0739403	0.0105631	0.15633	0.107741	0.0335103	0.042252	0.109854	0.0335103	0.118304	0.242945	0.135205		0.061265
0.399271	0.0971787	0.0335103	0.266182	0.0335103	0.0232386	0.26407	0.042235	0.0676026	0.0063379	0.0359142	0.0335103	0.0042253	0.295757	0.0253514	0.0169009	0.194356	0.0232386	0.494335	0.095066		0.101403
0.359134	0.0929534	0.0335103	0.0335103	0.454197	0.0335103	0.380258	0.152044	0.122529	0.031689	0.111967	0.031689	0.276745	0.0169009	0.135205	0.143654	0.0169009	0.14788	0.0063379	0.194356		0.0335103
0.135205	0.418284	0.0335103	0.116192	0.0042253	0.0042253	0.0633778	0.130927	0.0823906	0.0335103	0.0335103	0.18168	0.0211261	0.0866157	0.671787	0.0401393	0.0507022	0.0147883	0.0992913	0.270407		0.14788
0.162668	0.133092	0.0335103	0.0335103	0.0335103	0.0528147	0.0380269	0.344208	0.0147883	0.0063379	0.0718279	0.084503	0.0591524	0.0335103	0.0126757	0.114079	0.0147883	0.202806	0.0084505	0.166893		0.0760529
0.107741	0.0380269	0.204918	0.0335103	0.0335103	0.0042253	0.0549274	0.0464584	0.0866157	0.17323	0.124642	0.0295765	0.0633778	0.0654902	0.0335103	0.0718279	0.166893	0.0338017	0.095066	0.109854		0.0169009
0.312658	0.249282	0.0654902	0.0335103	0.0126757	0.090841	0.207031	0.0335103	0.0335103	0.0335103	0.0147883	0.0528147	0.103516	0.0147883	0.0781655	0.061265	0.061265	0.0549274	0.090841	0.109854		0.0211261
0.0042253	0.141542	0.0335103	0.0335103	0.0507022	0.0063379	0.0992913	0.179496	0.0654902	0.291532	0.128867	0.0464771	0.0633778	0.0697152	0.367584	0.270407	0.0697152	0.0335103	0.118304	0.0739403		0.0169009
0.109854	0.111967	0.0042253	0.468985	0.0063379	0.397159	0.0676026	0.0042236	0.149993	0.0485894	0.0211261	0.283083	0.126754	0.0380269	0.128867	0.0295765	0.111967	0.0359142	0.0887282	0.0676026		0.0338017
0.0063379	0.428847	0.0335103	0.0335103	0.0335103	0.0105631	0.137317	0.050682	0.0335103	0.154217	0.0335103	0.0739403	0.107741	0.0335103	0.042252	0.118304	0.031689	0.061265	0.213369	0.175343		0.152105
0.0866157	0.0866157	0.0253514	0.0335103	0.0042253	0.0084505	0.031689	0.29775	0.0464771	0.316883	0.0335103	0.0380269	0.0274639	0.0335103	0.0401393	0.219706	0.031689	0.0084505	0.0887282	0.141542		0.175343
0.0063379	0.31477	0.49011	0.0042253	0.0042253	0.128867	0.031689	0.0084472	0.0485898	0.0335103	0.0335103	0.105629	0.0676026	0.0570397	0.137317	0.122529	0.0253514	0.228156	0.105629	0.175343		0.0464771
0.190131	0.188018	0.0335103	0.0105631	0.0335103	0.0335103	0.0591524	0.0335103	0.0063379	0.0105631	0.095066	0.084503	0.0359142	0.0443645	0.137317	0.105629	0.0084505	0.084503	0.114079	0.747842		0.0739403
1.02246	0.223931	0.0335103	0.0063379	0.0335103	0.0739403	0.031689	0.0527936	0.196469	0.0633774	0.031689	0.122529	0.0464771	0.0464771	0.14788	0.0507022	0.0126757	0.0126757	0.346458	0.0528147		0.114079
0.190131	0.0760529	0.0335103	0.261957	0.312658	0.0335103	0.0739403	0.137262	0.0335103	0.126754	0.0042253	0.15633	0.0063379	0.0570397	0.185906	0.0211261	0.0211261	0.0274639	0.0359142	0.0335103		0.327445
0.443635	0.0507022	0.0335103	0.0335103	0.0570401	0.0335103	0.466872	0.0591289	0.0781655	0.042252	0.0084505	0.0887282	0.126754	0.042252	0.0338017	0.0992909	0.107741	0.0232386	0.0718279	0.0335103		0.386596
0.084503	0.15633	0.0549274	0.122529	0.0335103	0.0335103	0.090841	0.0443466	0.0147883	0.0697152	0.185906	0.53448	0.169005	0.0528147	0.0866157	0.278857	0.0335103	0.126754	0.128867	0.0802782		0.251394
0.249282	0.14788	0.437297	0.0084505	0.0335103	0.171118	0.0335103	0.166826	0.0063379	0.0335103	0.0274639	0.0485894	0.120417	0.0169009	0.0105631	0.0147883	0.0232386	0.0335103	0.145767	0.0760529		0.0190134
0.31477	0.107741	0.0063379	0.0549274	0.0335103	0.0335103	0.0084505	0.0739109	0.152105	0.0335103	0.0697152	0.0549274	0.0232386	0.0401393	0.0232386	0.0169009	0.0335103	0.0063379	0.0971787	0.0591524		0.120417
0.202806	0.312658	0.0335103	0.0335103	0.0042253	0.0335103	0.0929534	0.145709	0.0253514	0.0591524	0.0335103	0.242944	0.202806	0.0485894	0.0697152	0.0781655	0.17323	0.0335103	0.0335103	0.0335103		0.0126757
0.0335103	0.424622	0.0335103	0.0147883	0.120417	0.0335103	0.0760529	0.0443466	0.0335103	0.0507022	0.0042253	0.0464771	0.0443645	0.439409	0.031689	0.090841	0.0335103	0.0211261	0.25562	0.149993		0.111967
1.04358	0.449973	0.0335103	0.0335103	0.0105631	0.0335103	0.111967	0.050682	0.0232386	0.0042253	0.0105631	0.160555	0.0823906	0.084503	0.308433	0.0464771	0.152105	0.0971787	0.13098	0.090841		0.902044
0.0335103	0.264069	0.0335103	0.0335103	0.0042253	0.0042253	0.0338017	0.0126707	0.0485898	0.0084505	0.0253514	0.141542	0.126754	0.149993	0.0570401	0.0105631	0.0042253	0.0507022	0.061265	0.188018		0.219706
0.0335103	0.042252	0.0335103	0.0147883	0.0335103	0.0528147	0.274632	0.0105589	0.0359142	0.0169009	0.0042253	0.18168	0.0401393	0.0105631	0.0380269	0.0169009	0.158443	0.0232386	0.0084505	0.190131		0.101403
0.139429	0.154217	0.0169009	0.0335103	0.0063379	0.0335103	0.0126757	0.0335103	0.0335103	0.0042253	0.0401393	0.0147883	0.253507	0.177455	0.143654	0.0760529	0.373922	0.0063379	0.105629	0.16478		0.274632
0.965415	0.0971787	0.0335103	0.095066	0.0485898	0.0335103	0.0274639	0.0971394	0.0338017	0.0126757	0.0063379	0.0802782	0.13098	0.401384	0.0591524	0.0211261	0.143654	0.0697152	0.0528147	0.0570397		0.0549274
0.0335103	0.0464771	0.0335103	0.0335103	0.0335103	0.0887282	0.0845035	0.120368	0.0570401	0.0105631	0.0232386	0.0232386	0.0971787	0.183793	0.0126757	0.0335103	0.0549274	0.0338017	0.695029	0.0676026		0.0464771
0.202806	0.287308	0.0042253	0.0591524	0.0591524	0.0335103	0.0335103	0.0168942	0.145767	0.0042253	0.306321	0.369696	0.124642	0.259844	0.133092	0.0253512	0.042252	0.232381	0.0823906	0.0739403		0.158443
0.0042253	0.0359142	0.335896	0.371808	0.0335103	0.0528147	0.198581	0.0147823	0.0126757	0.0971787	0.0105631	0.270407	0.0253514	0.0992909	0.0253514	0.0335103	0.0507022	0.0718279	0.0042253	0.198581		0.27252
0.0084505	0.485885	0.0335103	0.0335103	0.0335103	0.16478	0.0335103	0.320979	0.0232386	0.517572	0.0042253	0.0739403	0.0126757	0.221819	0.0507022	0.0063379	0.0335103	0.327445	0.0105631	0.0335103		0.0335103
0.183793	0.0485898	0.0335103	0.0147883	0.0335103	0.105629	0.0549274	0.0908044	0.0232386	0.0401393	0.0507022	0.266182	0.135205	0.0169009	0.0845035	0.169005	0.061265	0.061265	0.0335103	0.109854		0.0929534
0.042252	0.031689	0.0126757	0.0042253	0.0335103	0.0063379	0.0633778	0.0042236	0.0335103	0.160555	0.0042253	0.0401393	0.095066	0.526021	0.0760529	0.0063379	0.308433	0.56193	0.0126757	0.0802782		0.268294
0.538695	0.061265	0.0335103	0.583067	0.259844	0.0654902	0.0063379	0.0147823	0.293645	0.0211261	0.0464771	0.0147883	0.0063379	0.0380269	0.0485898	0.0211261	0.29787	0.0042253	0.0274639	0.0232386		0.0591524
0.0380269	0.0042253	0.0335103	0.0802782	0.0335103	0.0105631	0.17323	0.0147823	0.0338017	0.0042253	0.0338017	0.0084505	0.0802782	0.0718279	0.0126757	0.183793	0.0718279	0.0274639	0.0335103	0.0084505		0.162668
0.0528147	0.741505	0.0335103	0.0335103	0.0335103	0.0274639	0.266182	0.0950277	0.0464771	0.0464771	0.169005	0.0570397	0.0274639	0.143654	0.0823906	0.139429	0.0042253	0.519686	0.0063379	0.202806		0.090841
0.0335103	0.152105	0.0335103	0.576728	0.0335103	0.0105631	0.234494	0.0042236	0.17323	0.0528147	0.0549274	0.0335103	0.0063379	0.240832	0.118304	0.0042253	0.183793	0.0190134	0.0042253	0.0126757		0.0633774
0.0335103	0.209143	0.0042253	0.107741	0.0335103	0.0335103	0.109854	0.204836	0.0295765	0.0042253	0.0335103	0.0528147	0.327445	0.0295765	0.0845035	0.0042253	0.122529	0.0507022	0.0335103	0.0126757		0.426734
0.251394	0.154217	0.0335103	0.0380269	0.0232386	0.166893	0.401384	0.0358998	0.0042253	0.0042253	0.0528147	0.0697152	0.0760529	0.0335103	0.194356	0.0633774	0.105629	0.0335103	0.0570401	0.122529		0.280969
0.0042253	0.392934	0.0485898	0.0063379	0.0169009	0.0335103	0.0042253	0.0823577	0.0570401	0.175343	0.0335103	0.084503	0.141542	0.0718279	0.0335103	0.270407	0.16478	0.365471	0.0169009	0.424622		0.190131
0.0401393	0.0443645	0.0335103	0.0084505	0.0335103	0.0570397	0.0401393	0.0042236	0.133092	0.0169009	0.0063379	0.128867	0.0654902	0.369696	0.15633	0.0676026	0.0718279	0.0887282	0.0274639	0.101403		0.0866157
0.359134	0.238719	0.031689	0.266182	0.0063379	0.0105631	0.0866157	0.0105589	0.0866157	0.0232386	0.0253514	0.114079	0.0084505	0.090841	0.0335103	0.0084505	0.143654	0.0335103	0.042252	0.109854		0.061265
0.665445	0.0760529	0.0335103	0.0335103	0.0335103	0.15633	0.24717	0.050682	0.0507022	0.0338017	0.0105631	0.0126757	0.0169009	0.0338017	0.570385	0.0654902	0.031689	0.166893	0.0335103	0.50701		0.31477
0.0335103	0.118304	0.0335103	0.0335103	0.0335103	0.276744	0.0211261	0.0591289	0.0335103	0.0633774	0.0485898	0.130979	0.293645	0.0591524	0.061265	0.101403	0.0697152	0.0253512	0.061265	0.302095		0.0654902
0.0084505	0.0401393	0.0485898	0.0335103	0.0335103	0.0042253	0.126754	0.0335103	0.0335103	0.0335103	0.0105631	0.124642	0.0718279	0.34857	0.0274639	0.354909	0.061265	0.16478	0.0760529	0.114079		0.380258
0.090841	0.158443	0.0335103	0.0253512	0.787985	0.162668	0.308433	0.19639	0.0335103	0.0866157	0.0042253	0.0485894	0.0126757	0.105629	0.0063379	0.0802782	0.0549274	0.061265	0.373922	0.0190134		0.17323
0.0335103	0.200693	0.0335103	0.0335103	0.0335103	0.0338017	0.154217	0.033788	0.207031	0.0042253	0.0084505	0.166893	0.0147883	0.149993	0.278858	0.312658	0.031689	0.0887282	0.149993	0.0232386		0.0042253
0.0335103	0.194356	0.401384	0.0335103	0.0042253	0.373922	0.171118	0.0211176	0.061265	0.0126757	0.0335103	0.0211261	0.0105631	0.342233	0.0335103	0.0401393	0.0528147	0.116192	0.101404	0.230269		0.177455
0.0380269	0.158443	0.0042253	0.0335103	0.0335103	0.105629	0.124642	0.0168942	0.0718279	0.0697152	0.177455	0.0507022	0.0443645	0.128867	0.0190134	0.17323	0.207031	0.126754	0.245057	0.0359142		0.456309
0.500673	0.0401393	0.0335103	0.0335103	0.0147883	0.0718279	0.118304	0.0295647	0.0359142	0.0739403	0.0633778	0.0781655	0.0190134	0.122529	0.18168	0.107741	0.090841	0.0887282	0.0845035	0.0338017		0.0823906
0.0335103	0.464759	0.0042253	0.424622	0.0335103	0.0401393	0.0253514	0.042235	0.0335103	0.0335103	0.0169009	0.0760529	0.0485898	0.122529	0.0335103	0.0654902	0.213369	0.0443645	0.128867	0.15633		0.0042253
0.0042253	0.0464771	0.0042253	0.0063379	0.0654902	0.0549274	0.101404	0.0401232	0.0591524	0.0335103	0.0633778	0.160555	0.340121	0.0105631	0.0105631	0.135205	0.0570401	0.0739403	0.346458	0.126754		0.0507022
0.0042253	0.0676026	0.0570397	0.0335103	0.0335103	0.0335103	0.0507022	0.0295647	0.0042253	0.0335103	0.0335103	0.0274639	0.0169009	0.084503	0.0232386	0.042252	0.0253514	0.120417	0.0084505	0.0401393		0.194356
0.0335103	0.0654902	0.0335103	0.0105631	0.0190134	0.0335103	0.0274639	0.0527936	0.0739403	0.0084505	0.139429	0.090841	0.0335103	0.0335103	0.0105631	0.158443	0.0866157	0.0929534	0.0781655	0.0380269		0.475322
0.0335103	0.0887282	0.424622	0.386596	0.0335103	0.0211261	0.0359142	0.0527936	0.0063379	0.135205	0.0570401	0.0570397	0.0042253	0.0443645	0.126754	0.0528147	0.0739403	0.145767	0.0084505	0.217594		0.111967
0.585179	0.0866157	0.0335103	0.0335103	0.0335103	0.0739403	0.200693	0.0335103	0.0063379	0.0335103	0.0063379	0.101403	0.0335103	0.251394	0.0105631	0.107741	0.344345	0.0084505	0.031689	0.0718279		0.0335103
0.0211261	0.124642	0.0335103	0.0042253	0.0401393	0.090841	0.0126757	0.0971394	0.0335103	0.0211261	0.0063379	0.103516	0.0676026	0.0760529	0.0335103	0.107741	0.0335103	0.0401393	0.0084505	0.124642		0.0084505
0.0401393	0.031689	0.162668	0.0335103	0.0042253	0.0866157	0.257732	0.0823577	0.207031	0.397159	0.0063379	0.0105631	0.0063379	0.0485894	0.0335103	0.0549274	0.0971787	0.0485894	0.111967	0.0929534		0.175343
0.135205	0.0887282	0.0042253	0.084503	0.0464771	0.031689	0.0549274	0.0274529	0.101404	0.0232386	0.0232386	0.0697152	0.0335103	0.145767	0.0190134	0.0781655	0.145767	0.0697152	0.0042253	0.0929534		0.084503
0.0633778	0.236606	0.0335103	0.0335103	0.0335103	0.0335103	0.369697	0.0126707	0.198581	0.0887282	0.0335103	0.0126757	0.111967	0.0335103	0.0335103	0.0781655	0.0169009	0.278857	0.0781655	0.0697152		0.437297
0.0802782	0.0528147	0.0335103	0.0335103	0.0335103	0.0042253	0.109854	0.0126707	0.0802782	0.109854	0.0063379	0.105629	0.0295765	0.48166	0.0295765	0.0253512	0.122529	0.0570397	0.13098	0.0126757		0.126754
0.0063379	0.0633778	0.0335103	0.0335103	0.0042253	0.0042253	0.185906	0.0464584	0.042252	0.0760529	0.0335103	0.120417	0.0654902	0.0190134	0.200693	0.0042253	0.0507022	0.0739403	0.289421	0.217594		0.268294
1.09639	0.0274639	0.0274639	0.0338017	0.0335103	0.162668	0.128867	0.0696873	0.0190134	0.0507022	0.0042253	0.564056	0.0739403	0.0335103	0.0105631	0.0274639	0.0992913	0.0042253	0.0042253	0.177455		0.749956
0.0401393	0.371808	0.0335103	0.0335103	0.0335103	0.084503	0.280971	0.130927	0.242945	0.111967	0.0335103	0.0507022	0.0147883	0.0338017	0.0190134	0.0063379	0.0063379	0.0335103	0.185906	0.283083		0.139429
0.0335103	0.0295765	0.0169009	0.0335103	0.0335103	0.0338017	0.105629	0.168937	0.0887282	0.523913	0.0992913	0.485885	0.0335103	0.0335103	0.232381	0.0335103	0.105629	0.061265	0.0042253	0.270407		0.0718279
0.0042253	0.0126757	0.0335103	0.0335103	0.0335103	0.0335103	0.0042253	0.139374	0.0335103	0.0295765	0.0084505	0.0739403	0.0105631	0.0359142	0.0063379	0.0528147	0.114079	0.0802782	0.090841	0.363359		0.0443645
0.0063379	0.0591524	0.0042253	0.0335103	0.0063379	0.416172	0.217594	0.192166	0.0338017	0.0147883	0.0338017	0.0105631	0.0253514	0.137317	0.101404	0.0802782	0.0633778	0.0359142	0.0485898	0.0591524		0.304207
0.0335103	0.357021	0.0335103	0.0760529	0.0063379	0.0335103	0.331671	0.0063354	0.0063379	0.0338017	0.0401393	0.0443645	0.0507022	0.0718279	0.0464771	0.0401393	0.0823906	0.135205	0.0760529	0.202806		0.0335103
0.0126757	0.14788	0.105629	0.0335103	0.261957	0.0042253	0.213369	0.0042236	0.0253514	0.177455	0.0232386	0.15633	0.042252	0.0570397	0.0190134	0.198581	0.223931	0.124642	0.221819	0.183793		0.591512
0.111967	0.0781655	0.0042253	0.0464771	0.0105631	0.0380269	0.0105631	0.063352	0.111967	0.0105631	0.0211261	0.0359142	0.169005	0.0335103	0.0335103	0.0380269	0.0380269	0.468985	0.149993	0.0063379		0.0105631
0.0042253	0.196468	0.0042253	1.11964	0.0335103	0.0335103	0.318996	0.0147823	0.0335103	0.0739403	0.0042253	0.0739403	0.0570401	0.124642	0.031689	0.135205	0.0845035	0.0335103	0.0147883	0.0253512		0.0126757
0.327445	0.175343	0.0335103	0.0335103	0.0335103	0.0335103	0.285196	0.0760225	0.0335103	0.287308	0.0063379	0.194356	0.202806	0.0697152	0.0126757	0.0485894	0.0190134	0.0335103	0.0169009	0.169005		0.0274639
0.185906	0.145767	0.0760529	0.0042253	0.13098	0.17323	0.116192	0.0316762	0.0084505	0.0335103	0.0335103	0.0464771	0.0232386	0.0338017	0.162668	0.192243	0.0591524	0.118304	0.105629	0.0295765		0.0147883
0.0063379	0.158443	0.0147883	0.0147883	0.0335103	0.0084505	0.171118	0.0190059	0.0338017	0.0211261	0.0823906	0.196468	0.551376	0.116192	0.095066	0.0401393	0.217594	0.0485894	0.0126757	0.321108		0.0211261
0.0063379	0.0063379	0.0823906	0.0084505	0.0335103	0.0335103	0.128867	0.162603	0.0063379	0.0335103	0.0401393	0.204918	0.416172	0.0147883	0.0335103	0.139429	0.101404	0.0274639	0.0084505	0.0887282		0.226044
0.175343	0.0335103	0.0335103	0.0335103	0.0335103	0.0042253	0.348571	0.253406	0.0063379	0.0169009	0.183793	0.0633774	0.0359142	0.103516	0.219707	0.0718279	0.090841	0.274632	0.139429	0.0549274		0.0401393
0.253507	0.0042253	0.0105631	0.0335103	0.0335103	0.0063379	0.0781655	0.0084472	0.0359142	0.0105631	0.0169009	0.0528147	0.0274639	0.0335103	0.0084505	0.175343	0.0570401	0.0591524	0.0570401	0.32322		0.111967
0.354909	0.0063379	0.0338017	0.0335103	0.0084505	0.0335103	0.171118	0.268187	0.0042253	0.0335103	0.0190134	0.0105631	0.0507022	0.0126757	0.378147	0.0887282	0.111967	0.0359142	0.166893	0.124642		0.0887282
0.0654902	0.0042253	0.107741	0.49011	0.0063379	0.0485894	0.0169009	0.126703	0.0335103	0.0105631	0.0338017	0.0992909	0.462647	0.0443645	0.0084505	0.0274639	0.042252	0.0211261	0.0147883	0.538695		0.152105
0.0335103	0.0338017	0.0190134	0.0760529	0.0084505	0.0335103	0.0042253	0.0717991	0.0042253	0.0335103	0.0190134	0.158443	0.0359142	0.0633774	0.0295765	0.116192	0.221819	0.0147883	0.0335103	0.0802782		0.103516
0.0335103	0.331671	0.0335103	0.395046	0.0335103	0.0507022	0.135205	0.0042236	0.0126757	0.0169009	0.0295765	0.0335103	0.640101	0.0042253	0.116192	0.0211261	0.090841	0.0335103	0.200693	0.179568		0.190131
0.143654	0.0760529	0.0335103	0.0335103	0.0335103	0.0739403	0.0866157	0.105587	0.0084505	0.0126757	0.0335103	0.0042253	0.031689	0.0169009	0.27252	0.177455	0.0335103	0.128867	0.105629	0.0335103		0.0105631
0.17323	0.532365	0.0335103	0.200693	0.0042253	0.211256	0.0718279	0.0443466	0.0105631	0.0335103	0.0380269	0.111967	0.483773	0.169005	0.17323	0.0084505	0.126754	0.0654902	0.0335103	0.289419		0.124642
0.090841	0.0359142	0.0335103	0.0042253	0.0335103	0.399271	0.462647	0.139374	0.0570401	0.0232386	0.0274639	0.0718279	0.0507022	0.0528147	0.295758	0.0760529	0.0359142	0.202806	0.0105631	0.31477		0.183793
0.462647	0.114079	0.17323	0.0335103	0.0335103	0.0697152	0.0063379	0.318867	0.0147883	0.042252	0.0781655	0.0528147	0.0528147	0.0802782	0.802764	0.221819	0.118304	0.291532	0.090841	0.388709		0.631643
0.0549274	0.0654902	0.0335103	0.0335103	0.0359142	0.207031	0.0401393	0.373771	0.105629	0.0042253	0.0084505	0.137317	0.031689	0.101403	0.126754	0.0084505	0.0274639	0.175343	0.0042253	0.27252		0.061265
0.0971787	0.084503	0.0335103	0.0335103	0.0232386	0.0929534	0.0443645	0.0335103	0.0845035	0.0443645	0.031689	0.158443	0.13098	0.0401393	0.0633778	0.152105	0.107741	0.0084505	0.0063379	0.471097		0.14788
0.0042253	0.249282	0.0063379	0.0335103	0.0335103	0.51546	0.0335103	0.0570172	0.0335103	0.0528147	0.0169009	0.213368	0.0335103	0.133092	0.278858	0.17323	0.0739403	0.084503	0.25562	0.190131		0.868253
0.0335103	0.226044	0.0126757	0.257732	0.0335103	0.0211261	0.0359142	0.0654639	0.0105631	0.0335103	0.095066	0.0697152	0.0126757	0.0274639	0.124642	0.0295765	0.0147883	0.145767	0.0063379	0.0591524		0.0760529
0.0253514	0.135205	0.101404	0.0335103	0.0335103	0.245057	0.0190134	0.0335103	0.0335103	0.0971787	0.0147883	0.118304	0.0063379	0.0295765	0.133092	0.116192	0.133092	0.0338017	0.0335103	0.031689		0.29787
0.0105631	0.0802782	0.7246	0.0335103	0.0063379	0.171118	0.124642	0.158379	0.0335103	0.0676026	0.0190134	0.0507022	0.228156	0.295757	0.0697152	0.0338017	0.13098	0.0232386	0.042252	0.105629		0.0335103
0.0335103	0.0335103	0.0485898	0.0335103	0.0042253	0.0042253	0.0971787	0.0696873	0.120417	0.0654902	0.192244	0.0676026	0.114079	0.0084505	0.0464771	0.0274639	0.15633	0.128867	0.177455	0.0253512		0.0887282
0.0802782	0.166893	0.0570397	0.0401393	0.0335103	0.0063379	0.0823906	0.0739109	0.0335103	0.0211261	0.0591524	0.0887282	0.0528147	0.0929534	0.0335103	0.042252	0.0654902	0.175343	0.15633	0.095066		0.329558
0.0126757	0.0401393	0.0211261	0.0335103	0.0335103	0.0105631	0.0147883	0.0886926	0.0295765	0.0866157	0.0866157	0.15633	0.0845035	0.0380269	0.0084505	0.0335103	0.24717	0.0147883	0.0338017	0.0042253		0.107741
0.276745	0.107741	0.0335103	0.0295765	0.169005	0.0335103	0.0359142	0.107698	0.0507022	0.0063379	0.0335103	0.0823906	0.0507022	0.194356	0.0335103	0.130979	0.0295765	0.0570397	0.0042253	0.118304		0.101403
0.511236	0.361247	0.0335103	0.0335103	0.0335103	0.0380269	0.0401393	0.0886926	0.0295765	0.0823906	0.0335103	0.171118	0.0570401	0.154217	0.0992913	0.0359142	0.0274639	0.0042253	0.43941	0.0042253		0.0084505
0.0739403	0.135205	0.0335103	0.0126757	0.0335103	0.0042253	0.0105631	0.0335103	0.0042253	0.0335103	0.0335103	0.031689	0.0335103	0.061265	0.103516	0.135205	0.0126757	0.0232386	0.703468	0.137317		0.0718279
0.0211261	0.321108	0.0335103	0.754175	0.0335103	0.0401393	0.0760529	0.0549053	0.0105631	0.0335103	0.107741	0.0866157	0.0739403	0.143654	0.0063379	0.0443645	0.0528147	0.0380269	0.0739403	0.30632		0.0464771
0.0042253	0.0105631	0.0335103	0.0335103	0.0335103	0.0823906	0.061265	0.116145	0.0802782	0.0105631	0.0528147	0.0042253	0.183793	0.179568	0.14788	0.185906	0.312658	0.169005	0.0992913	0.135205		0.160555
0.0063379	0.348571	0.0126757	0.0335103	0.0335103	0.236606	0.445748	0.120368	0.0335103	0.120417	0.166893	0.0485894	0.0169009	0.0401393	0.0211261	0.371808	0.042252	0.101403	0.0507022	0.18168		0.264069
0.948532		0.0335103	0.0335103	0.0042253	0.0359142	0.354909	0.0929162	0.0063379	0.17323	0.0147883	0.0401393	0.217594	0.149993	0.0335103	0.0570397	0.213369	0.384484	0.0802782	0.179568		0.669674
0.230269		0.0335103	0.0042253	0.0063379	0.0359142	0.13098	0.0042236	0.188018	0.042252	0.0591524	0.0549274	0.0335103	0.0802782	0.0697152	0.0485894	0.0654902	0.124642	0.149993	0.251394		0.175343
0.0190134		0.0335103	0.0084505	0.0335103	0.0063379	0.198581	0.0232294	0.0042253	0.0335103	0.118304	0.124642	0.0042253	0.0739403	0.0295765	0.0253512	0.631643	0.0232386	0.116192	0.0443645		0.188018
0.158443		0.0380269	0.0485894	0.0335103	0.0211261	0.0042253	0.337873	0.0295765	0.0042253	0.061265	0.0992909	0.0335103	0.0443645	0.0591524	0.0802782	0.627416	0.0380269	0.0335103	0.483772		0.196468
0.061265		0.0232386	0.0335103	0.0042253	0.031689	0.0697152	0.0105589	0.158443	0.0760529	0.0190134	0.0335103	0.0338017	0.0697152	0.479548	0.0507022	0.135205	0.437297	0.139429	0.160555		0.0359142
0.0042253		0.0335103	0.0232386	0.0042253	0.137317	0.268294	0.0335103	0.0335103	0.0169009	0.0485898	0.0760529	0.0063379	0.0380269	0.188018	0.223931	0.0338017	0.240832	0.0105631	0.0676026		0.278857
0.0887282		0.0232386	0.0401393	0.042252	0.0335103	0.0866157	0.152044	0.0335103	0.0781655	0.0335103	0.0274639	0.0676026	0.162668	0.0401393	0.103516	0.0380269	0.357021	0.0992913	0.0274639		0.120417
0.0464771		0.0335103	0.0335103	0.344345	0.0042253	0.15633	0.107698	0.109854	0.0335103	0.0697152	0.101403	0.090841	0.335896	0.0654902	0.0401393	0.0147883	0.0823906	0.27252	0.145767		0.0676026
0.823895		0.0335103	0.0335103	0.0335103	0.0042253	0.0485898	0.0295647	0.0063379	0.031689	0.0335103	0.0338017	0.0295765	0.0380269	0.0147883	0.0359142	0.0042253	0.128867	0.103516	0.105629		0.0105631
0.0335103		0.0335103	0.0190134	0.0042253	0.0528147	0.0591524	0.0084472	0.042252	0.226044	0.179568	0.111967	0.192244	0.0295765	0.16478	0.0570397	0.105629	0.0380269	0.0126757	0.0507022		0.0335103
0.299982		0.0335103	0.0335103	0.0335103	0.0335103	0.031689	0.042235	0.061265	0.188018	0.0887282	0.0570397	0.0335103	0.0211261	0.0718279	0.0802782	0.0570401	0.0253512	0.722495	0.0295765		0.0359142
0.169005		0.0335103	0.0380269	0.0335103	0.0063379	0.196469	0.0380116	0.0335103	0.0084505	0.0929534	0.299982	0.0105631	0.0338017	0.0335103	0.0654902	0.0211261	0.0380269	0.762621	0.454197		0.116192
0.0570397		0.0335103	0.0380269	0.0335103	0.0042253	0.031689	0.120368	0.40561	0.365471	0.145767	0.0823906	0.0335103	0.0169009	0.0084505	0.116192	0.0676026	0.0253512	0.114079	0.031689		0.363359
0.116192		0.0549274	0.0147883	0.101404	0.0042253	0.0126757	0.103475	0.0633778	0.0760529	0.198581	0.0063379	0.166893	0.211256	0.0866157	0.329558	0.0274639	0.101403	0.101404	0.0253512		0.0929534
0.0126757		0.0042253	0.0335103	0.0232386	0.34857	0.137317	0.103475	0.0335103	0.0676026	0.0190134	0.0760529	0.16478	0.0232386	0.403497	0.0654902	0.0042253	0.128867	0.061265	0.397159		0.15633
1.0626		0.0335103	0.0063379	0.0335103	0.0042253	0.143654	0.0105589	0.0781655	0.0359142	0.0063379	0.0105631	0.411948	0.223931	0.0633778	0.0359142	0.14788	0.031689	0.257732	0.0169009		0.128867
0.500673		0.0335103	0.137317	0.0335103	0.0335103	0.0042253	0.0335103	0.0443645	0.0335103	0.0190134	0.149993	0.16478	0.264069	0.53448	0.0359142	0.0335103	0.135205	0.0253514	0.111967		0.223931
0.0338017		0.0042253	0.0507022	0.0335103	0.0105631	0.17323	0.0042236	0.0335103	0.0443645	0.152105	0.111967	0.234494	0.0359142	0.145767	0.0084505	0.095066	0.221819	0.0042253	0.090841		0.24717
0.0866157		0.0464771	0.0335103	0.0633778	0.0781655	0.585179	0.0105589	0.0042253	0.14788	0.0464771	0.0507022	0.0507022	0.0232386	0.0232386	0.118304	0.105629	0.0507022	0.0042253	0.0401393		0.304207
0.80699		0.0335103	0.242944	0.0335103	0.0063379	0.0084505	0.0549053	0.0335103	0.118304	0.0335103	0.177455	0.154217	0.042252	0.0169009	0.0570397	0.49856	0.0718279	0.0232386	0.160555		0.143654
0.397159		0.226044	0.0335103	0.0335103	0.0042253	0.0866157	0.0063354	0.0845035	0.0084505	0.0633778	0.308433	0.0464771	0.0359142	0.120417	0.17323	0.031689	0.0443645	0.139429	0.0084505		0.0591524
0.711917		0.0335103	0.0105631	0.0335103	0.0105631	0.240832	0.13515	0.0697152	0.0464771	0.0633778	0.103516	0.0042253	0.0443645	0.0507022	0.0126757	0.0485898	0.0401393	0.0971787	0.0084505		0.30632
0.141542		0.0335103	0.0335103	0.0042253	0.0335103	0.0697152	0.0335103	0.0591524	0.0211261	0.0042253	0.0507022	0.126754	0.0464771	0.061265	0.0169009	0.0887282	0.0380269	0.0105631	0.0570397		0.0887282
0.0528147		0.0335103	0.188018	0.0335103	0.371808	0.257732	0.0739109	0.0654902	0.139429	0.0335103	0.0464771	0.0443645	0.042252	0.0295765	0.031689	0.0845035	0.128867	0.0126757	0.0084505		0.0802782
0.0359142		0.0295765	0.0654902	0.0335103	0.0211261	0.338008	0.0527936	0.116192	0.0929534	0.0063379	0.0654902	0.0232386	0.0676026	0.0443645	0.0190134	0.0063379	0.0401393	0.0633778	0.0335103		0.0739403
0.111967		0.0335103	0.0084505	0.0335103	0.0992909	0.200693	0.0211176	0.0126757	0.0549274	0.0105631	0.0335103	0.0335103	0.0335103	0.0739403	0.0718279	0.143654	0.124642	0.042252	0.0802782		0.0401393
0.0633778		0.0549274	0.0042253	0.0335103	0.329558	0.118304	0.0084472	0.13098	0.095066	0.0549274	0.154217	0.0295765	0.0549274	0.0338017	0.0549274	0.0335103	0.202806	0.0190134	0.152105		0.270407
0.0464771		0.0335103	0.0105631	0.0359142	0.0528147	0.095066	0.0591289	0.0105631	0.0169009	0.0760529	0.0105631	0.0823906	0.0335103	0.0274639	0.0253512	0.0507022	0.287308	0.0190134	0.128867		0.29787
0.0676026		0.0042253	0.0335103	0.0335103	0.0063379	0.422509	0.0971394	0.0464771	0.0063379	0.0633778	0.143654	0.105629	0.0464771	0.215481	0.0105631	0.0443645	0.0887282	0.0253514	0.149993		0.154217
0.0126757		0.162668	0.0464771	0.0335103	0.137317	0.17323	0.0335103	0.0335103	0.0274639	0.0335103	0.095066	0.0335103	0.0147883	0.0528147	0.53448	0.0126757	0.0887282	0.0190134	0.0126757		0.264069
0.0549274		0.0380269	0.0570397	0.0335103	0.0633774	0.407722	0.0654639	0.213369	0.0211261	0.0335103	0.0929534	0.179568	0.0042253	0.118304	0.0823906	0.325333	0.160555	0.0063379	0.0739403		0.236606
0.0147883		0.0042253	0.0335103	0.0335103	0.0190134	0.0739403	0.0335103	0.477435	0.221819	0.090841	0.0253512	0.236606	0.0633774	0.302096	0.0823906	0.0823906	0.126754	0.143654	0.0335103		0.175343
0.0253514		0.0781655	0.0335103	0.0718279	0.185906	0.0971787	0.0654639	0.0335103	0.0084505	0.0335103	0.107741	0.291533	0.0232386	0.175343	0.0992909	0.0126757	0.234494	0.0335103	0.0335103		0.0781655
0.0274639		0.338008	0.0380269	0.0063379	0.17323	0.0335103	0.204836	0.0570401	0.0335103	0.105629	0.0147883	0.042252	0.084503	0.124642	0.135205	0.162668	0.0232386	0.169005	0.213368		0.105629
0.0887282		0.0380269	0.0335103	0.0335103	0.0335103	0.0042253	0.118257	0.103516	0.0105631	0.18168	0.204918	0.0105631	0.0401393	0.378147	0.0147883	0.0190134	0.137317	0.0697152	0.111967		0.433071
0.0464771		0.0335103	0.0335103	0.0335103	0.0274639	0.126754	0.0335103	0.257732	0.0633774	0.0084505	0.0802782	0.0570401	0.0485894	0.0676026	0.0549274	0.090841	0.084503	0.280971	0.126754		0.388709
0.0211261		0.0147883	0.0335103	0.483773	0.107741	0.0591524	0.0612406	0.145767	0.0105631	0.103516	0.128867	0.0697152	0.0335103	0.257732	0.124642	0.204918	0.0335103	0.0335103	0.0359142		0.0485894
0.266182		0.0335103	0.0697152	0.0929534	0.0335103	0.0147883	0.204836	0.32322	0.0401393	0.0335103	0.242944	0.0147883	0.0887282	0.0335103	0.0126757	0.0464771	0.090841	0.0570401	0.0063379		0.0084505
0.0443645		0.236606	0.0042253	0.0105631	0.0042253	0.0295765	0.204836	0.0063379	0.130979	0.232381	0.154217	0.0485898	0.312658	0.0654902	0.107741	0.0335103	0.14788	0.26407	0.124642		0.280969
0.0549274		0.105629	0.0591524	0.0335103	0.0063379	0.314771	0.0168942	0.0359142	0.126754	0.0042253	0.133092	0.0380269	0.0570397	0.0359142	0.0190134	0.232381	0.0335103	0.160555	0.0335103		0.316883
0.141542		0.0335103	0.0190134	0.0335103	0.0335103	0.154217	0.0063354	0.0866157	0.0335103	0.0992913	0.107741	0.042252	0.487998	0.116192	0.0718279	0.118304	0.357021	0.283083	0.0169009		0.0528147
0.0274639		0.0335103	0.0335103	0.0335103	0.031689	0.0443645	0.0105589	0.363359	0.0042253	0.0335103	0.0528147	0.71404	0.32322	0.0335103	0.0105631	0.0739403	0.158443	0.124642	0.0147883		0.17323
0.0042253		0.0042253	0.0253512	0.0335103	0.0335103	0.0443645	0.0760225	0.0169009	0.122529	0.0063379	0.114079	0.0147883	0.0380269	0.0190134	0.0464771	0.0718279	0.0591524	0.371808	0.120417		0.0359142
0.0232386		0.0335103	0.0335103	0.042252	0.0335103	0.0929534	0.0274529	0.16478	0.0063379	0.200693	0.0971787	0.0042253	0.0823906	0.0335103	0.316883	0.126754	0.0335103	0.120417	0.0042253		0.30632
0.116192		0.0335103	0.0335103	0.0335103	0.0654902	0.101404	0.204836	0.0549274	0.0654902	0.0485898	0.109854	0.0992913	0.141542	0.111967	0.0718279	0.116192	0.042252	0.190131	0.105629		0.0485894
0.111967		0.371808	0.0335103	0.253507	0.0335103	0.0802782	0.0253411	0.192244	0.0760529	0.217594	0.0443645	0.0633778	0.0887282	0.190131	0.152105	0.0042253	0.215481	0.120417	0.0338017		0.0507022
0.149993		0.0042253	0.0335103	0.0335103	0.0335103	0.0570401	0.0527936	0.061265	0.236606	0.0802782	0.308433	0.0760529	0.128867	0.0866157	0.101403	0.107741	0.422509	0.621094	0.213368		0.0295765
0.310545		0.43096	0.0335103	0.0335103	0.0335103	0.0169009	0.145709	0.0380269	0.095066	0.0335103	0.0507022	0.219707	0.0105631	0.128867	0.0338017	0.0929534	0.194356	0.111967	0.34857		0.327445
0.0190134		0.0335103	0.551376	0.0335103	0.0147883	0.0971787	0.0042236	0.464761	0.0464771	0.0169009	0.116192	0.0591524	0.0718279	0.090841	0.137317	0.0929534	0.0570397	0.109854	0.149993		0.0887282
0.126754		0.0335103	0.0335103	0.0335103	0.0335103	0.149993	0.0717991	0.0335103	0.0295765	0.0760529	0.0105631	0.0781655	0.137317	0.0335103	0.251394	0.0253514	0.188018	0.061265	0.388709		0.158443
0.0335103		0.0335103	0.0042253	0.0335103	0.0147883	0.0528147	0.0042236	0.061265	0.0295765	0.0190134	0.090841	0.0570401	0.0781655	0.095066	0.0971787	0.169005	0.198581	0.0084505	0.126754		0.0063379
0.200693		0.084503	0.0335103	0.042252	0.0633774	0.0929534	0.130927	0.0802782	0.0042253	0.0718279	0.0549274	0.0633778	0.0887282	0.0105631	0.0105631	0.152105	0.264069	0.101404	0.354909		0.0992909
0.0335103		0.0676026	0.0335103	0.0042253	0.0042253	0.0507022	0.0760225	0.0528147	0.0335103	0.0380269	0.0528147	0.042252	0.0760529	0.0464771	0.0633774	0.128867	0.312658	0.101404	0.0105631		0.0866157
0.0591524		0.0335103	0.0335103	0.0335103	0.291532	0.194356	0.0464584	0.0042253	0.17323	0.261957	0.105629	0.0105631	0.031689	0.0042253	0.0359142	0.0507022	0.166893	0.0335103	0.0335103		0.141542
0.0718279		0.0335103	0.0335103	0.0335103	0.249282	0.0929534	0.0042236	0.0697152	0.0190134	0.0591524	0.0169009	0.0549274	0.14788	0.0887282	0.0126757	0.101404	0.291532	0.103516	0.18168		0.0063379
0.0232386		0.0335103	0.0042253	0.0335103	0.0929534	0.0274639	0.0696873	0.0781655	0.0359142	0.304208	0.232381	0.0401393	0.0887282	0.0676026	0.202806	0.177455	0.0485894	0.0802782	0.111967		0.141542
0.152105		0.0335103	0.162668	0.0126757	0.0338017	0.0335103	0.0335103	0.0654902	0.090841	0.061265	0.042252	0.103516	0.192243	0.188018	0.0633774	0.348571	0.0211261	0.0760529	0.245057		0.128867
0.0760529		0.0335103	0.0335103	0.0335103	0.0335103	0.0338017	0.0316762	0.031689	0.0335103	0.0105631	0.0169009	0.0147883	0.0718279	0.120417	0.0253512	0.94429	0.0676026	0.390821	0.122529		0.15633
0.0464771		0.0335103	0.0063379	0.0335103	0.0549274	0.042252	0.0335103	0.0845035	0.0084505	0.0335103	0.0335103	0.0084505	0.0338017	0.120417	0.120417	0.103516	0.0760529	0.0485898	0.0335103		0.0274639
0.0802782		0.139429	0.0335103	0.0443645	0.0335103	0.460534	0.0253411	0.0042253	0.0084505	0.0359142	0.143654	0.0253514	0.0105631	0.0335103	0.0335103	0.0147883	0.0274639	0.0335103	0.0335103		0.166893
0.0338017		0.0335103	0.0335103	0.0845035	0.084503	0.0232386	0.0335103	0.0295765	0.0887282	0.196469	0.105629	0.0335103	0.0443645	0.0335103	0.0063379	0.0335103	0.120417	0.249282	0.200693		0.274632
0.519686		0.090841	0.0335103	0.0335103	0.0105631	0.0211261	0.0570172	0.0485898	0.0042253	0.0760529	0.253506	0.0335103	0.0211261	0.0335103	0.0169009	0.0338017	0.0335103	0.251394	0.090841		0.0823906
0.0443645		0.0042253	0.487998	0.0335103	0.124642	0.0063379	0.13515	0.0126757	0.0971787	0.0802782	0.188018	0.0190134	0.0549274	0.0084505	0.0528147	0.13098	0.0971787	0.0335103	0.0169009		0.126754
0.0253514		0.0335103	0.0335103	0.0063379	0.0042253	0.154217	0.211172	0.24717	0.0335103	0.0676026	0.042252	0.0549274	0.0549274	0.236606	0.0929534	0.0105631	0.0739403	0.0760529	0.0335103		0.152105
0.0042253		0.0042253	0.0335103	0.0335103	0.0335103	0.0190134	0.0335103	0.0335103	0.0063379	0.0335103	0.031689	0.0591524	0.15633	0.0063379	0.122529	0.0485898	0.310545	0.0570401	0.0295765		0.0929534
0.162668		0.0866157	0.0084505	0.0042253	0.0063379	0.0126757	0.0335103	0.166893	0.133092	0.29787	0.268294	0.0063379	0.0274639	0.0274639	0.219706	0.0335103	0.183793	0.149993	0.0992909		0.0126757
0.0823906		0.0126757	0.0335103	0.0042253	0.274632	0.031689	0.0950277	0.0338017	0.528135	0.0253514	0.0042253	0.0443645	0.0380269	0.0335103	0.095066	0.169005	0.0335103	0.0253514	0.223931		0.0335103
0.331671		0.0042253	0.0464771	0.0335103	0.0169009	0.0866157	0.335761	0.0335103	0.114079	0.105629	0.232381	0.0253514	0.0380269	0.0335103	0.122529	0.0739403	0.0697152	0.095066	0.090841		0.0697152
0.177455		0.0042253	0.0295765	0.866142	0.0063379	0.0443645	0.0253411	0.0063379	0.0697152	0.0739403	0.116192	0.0063379	0.0887282	0.0335103	0.118304	0.0211261	0.0126757	0.031689	0.130979		0.316883
0.261957		0.0335103	0.0295765	0.0105631	0.0549274	0.0401393	0.0105589	0.0211261	0.14788	0.152105	0.240832	0.0042253	0.061265	0.0042253	0.0295765	0.0485898	0.0697152	0.179568	0.179568		0.190131
0.0823906		0.0887282	0.0335103	0.0528147	0.0335103	0.0929534	0.0042236	0.031689	0.462647	0.135205	0.061265	0.0676026	0.0633774	0.0335103	0.437297	0.0338017	0.0992909	0.0084505	0.257732		0.0359142
0.0887282		0.0084505	0.0359142	0.0105631	0.0528147	0.118304	0.128815	0.0084505	0.0971787	0.0485898	0.0063379	0.0443645	0.0633774	0.0335103	0.118304	0.0338017	0.0676026	0.133092	0.084503		0.0654902
0.0570397		0.0335103	0.0253512	0.192244	0.0253512	0.0063379	0.0335103	0.0380269	0.0338017	0.188018	0.061265	0.0697152	0.0338017	0.0335103	0.105629	0.0335103	0.141542	0.114079	0.542916		0.124642
0.0380269		0.0042253	0.0335103	0.103516	0.162668	0.0845035	0.118257	0.0697152	0.0335103	0.031689	0.0507022	0.0211261	0.124642	0.0485898	0.16478	0.0253514	0.0697152	0.141542	0.354909		0.171118
0.0253514		0.280969	0.0232386	0.0042253	0.204918	0.0063379	0.0654639	0.236606	0.133092	0.344345	0.0866157	0.0126757	0.32322	0.15633	0.118304	0.0507022	0.209143	0.0401393	0.0507022		0.283083
0.0169009		0.031689	0.0042253	0.0063379	0.209143		0.213283	0.0697152	0.031689	0.128867	0.0084505	0.0929534	0.0401393	0.0295765	0.0335103	0.031689	0.215481	0.109854	0.114079		0.0697152
0.0147883		0.0359142	0.0084505	0.0042253	0.031689		0.0591289	0.0401393	0.0654902	0.0549274	0.0570397	0.0084505	0.0335103	0.0042253	0.0335103	0.105629	0.166893	0.0443645	0.122529		0.042252
0.17323		0.855573	0.0084505	0.0335103	0.0401393		0.179496	0.0335103	0.137317	0.0335103	0.061265	0.095066	0.0335103	0.257732	0.114079	0.0992913	0.0507022	0.0633778	0.0823906		0.0042253
0.0335103		0.124642	0.0443645	0.0147883	0.0169009		0.27241	0.190131	0.114079	0.0063379	0.0042253	0.0528147	0.042252	0.0084505	0.139429	0.0802782	0.0211261	0.0335103	0.090841		0.0338017
0.823895		0.219707	0.0338017	0.166893	0.0718279		0.0063354	0.312658	0.128867	0.0190134	0.0380269	0.0169009	0.114079	0.0845035	0.276744	0.0549274	0.0126757	0.0929534	0.061265		0.0274639
0.0211261		0.0992913	0.0232386	0.0190134	0.160555		0.0105589	0.0147883	0.149993	0.0042253	0.084503	0.143654	0.0232386	0.0063379	0.236606	0.0335103	0.0380269	0.0760529	0.0464771		0.204918
0.111967		0.0485898	0.0335103	0.0211261	0.0105631		0.0042236	0.0654902	0.0802782	0.0042253	0.135205	0.114079	0.171118	0.0211261	0.18168	0.109854	0.084503	0.0169009	0.162668		0.0528147
0.278858		0.0335103	0.0335103	0.0335103	0.215481		0.0335103	0.0335103	0.0507022	0.114079	0.0781655	0.0633778	0.0443645	0.194356	0.107741	0.107741	0.0633774	0.169005	0.158443		0.0105631
0.031689		0.0380269	0.0232386	0.0335103	0.090841		0.430786	0.0042253	0.14788	0.0335103	0.0929534	0.0063379	0.0335103	0.0105631	0.221819	0.0105631	0.118304	0.0507022	0.0697152		0.325333
0.198581		0.152105	0.0335103	0.0335103	0.0507022		0.0401232	0.0063379	0.249282	0.0274639	0.295757	0.0507022	0.0335103	0.228156	0.183793	0.0335103	0.042252	0.145767	0.111967		0.215481
0.139429		0.204918	0.0335103	0.0042253	0.240832		0.0335103	0.120417	0.0335103	0.179568	0.162668	0.0443645	0.0042253	0.0169009	0.105629	0.160555	0.16478	0.111967	0.289419		0.0401393
0.0253514		0.0335103	0.0042253	0.0335103	0.0887282		0.118257	0.0126757	0.101403	0.0232386	0.202806	0.103516	0.0169009	0.042252	0.240832	0.0570401	0.0781655	0.126754	0.316883		0.0718279
0.0084505		0.031689	0.0464771	0.0084505	0.0866157		0.0335103	0.219707	0.471097	0.0147883	0.0380269	0.0823906	0.0335103	0.0335103	0.0866157	0.0570401	0.179568	0.0063379	0.042252		0.0570397
0.0335103		0.0464771	0.0335103	0.0633778	0.0570397		0.0929162	0.122529	0.0739403	0.0274639	0.124642	0.124642	0.0042253	0.061265	0.0507022	0.268294	0.0147883	0.135205	0.0802782		0.031689
0.49011		0.0335103	0.0335103	0.0528147	0.109854		0.0316762	0.126754	0.0338017	0.0823906	0.27252	0.0190134	0.0042253	0.0169009	0.0464771	0.126754	0.0464771	0.0042253	0.0528147		0.0887282
0.0335103		0.215481	0.130979	0.042252	0.0042253		0.0549053	0.0274639	0.0274639	0.0335103	0.0380269	0.230269	0.0335103	0.143654	0.0335103	0.0042253	0.0633774	0.0169009	0.0274639		0.0443645
0.331671		0.0528147	0.0335103	0.0335103	0.0063379		0.0654639	0.0485898	0.0211261	0.0718279	0.0992909	0.0464771	0.327445	0.0274639	0.33167	0.143654	0.0697152	0.0335103	0.0654902		0.0126757
0.0084505		0.0169009	0.0147883	0.16478	0.0084505		0.0042236	0.0084505	0.0697152	0.0063379	0.0823906	0.0335103	0.031689	0.0335103	0.126754	0.0042253	0.0063379	0.306321	0.487998		0.416172
0.221819		0.0528147	0.0335103	0.0380269	0.0169009		0.0335103	0.124642	0.0338017	0.0147883	0.0464771	0.0760529	0.0485894	0.716148	0.0084505	0.0464771	0.095066	0.031689	0.0126757		0.207031
0.0866157		0.0887282	0.0169009	0.103516	0.458422		0.0335103	0.0781655	0.0401393	0.18168	0.0929534	0.095066	0.0126757	0.0211261	0.105629	0.0335103	0.0464771	0.211256	0.0697152		0.0570397
0.346458		0.566155	0.0570397	0.24717	0.090841		0.266076	0.0105631	0.0169009	0.095066	0.0084505	0.120417	0.0549274	0.0084505	0.0654902	0.0335103	0.095066	0.468985	0.0464771		0.162668
0.0591524		0.0335103	0.0335103	0.0335103	0.145767		0.0063354	0.591512	0.0654902	0.0654902	0.0169009	0.0335103	0.084503	0.0359142	0.0654902	0.0335103	0.0211261	0.0570401	0.122529		0.215481
1.20202		0.0335103	0.137317	0.0084505	0.145767		0.0042236	0.0063379	0.14788	0.0105631	0.236606	0.0190134	0.0507022	0.0338017	0.124642	0.0335103	0.0760529	0.223931	0.0335103		0.29787
0.137317		0.0335103	0.0147883	0.0335103	0.318996		0.0335103	0.25562	0.0232386	0.29787	0.0507022	0.137317	0.0335103	0.061265	0.0718279	0.0042253	0.0380269	0.190131	0.0335103		0.0335103
0.17323		0.0335103	0.145767	0.0042253	0.0335103		0.0335103	0.0338017	0.0802782	0.116192	0.0697152	0.0335103	0.0169009	0.251394	0.179568	0.0147883	0.0335103	0.0443645	0.0464771		0.158443
0.090841		0.169005	0.0253512	0.0126757	0.940084		0.0042236	0.306321	0.0359142	0.0591524	0.0760529	0.0335103	0.0697152	0.042252	0.061265	0.149993	0.196468	0.43941	0.0063379		0.0401393
0.0507022		0.0335103	0.0335103	0.0359142	0.0781655		0.0335103	0.0335103	0.0380269	0.0380269	0.162668	0.111967	0.0063379	0.188018	0.109854	0.0042253	0.0443645	0.0802782	0.171118		0.109854
0.0105631		0.0335103	0.0335103	0.0084505	0.0295765		0.0335103	0.0211261	0.0105631	0.0507022	0.130979	0.287308	0.0485894	0.0042253	0.042252	0.0443645	0.0232386	0.0147883	0.0253512		0.0591524
0.0042253		0.0335103	0.0528147	0.207031	0.435184		0.0042236	0.0633778	0.0528147	0.154217	0.095066	0.111967	0.0335103	0.0549274	0.0718279	0.143654	0.0335103	0.116192	0.084503		0.0971787
0.240832		0.350683	0.0528147	0.0335103	0.0295765		0.185831	0.0823906	0.0335103	0.0380269	0.0591524	0.0232386	0.0126757	0.0335103	0.0992909	0.0781655	0.120417	0.0335103	0.0654902		0.149993
0.0042253		0.141542	0.0335103	0.0042253	0.0042253		0.291415	0.221819	0.0274639	0.031689	0.0295765	0.158443	0.0335103	0.0654902	0.344345	0.105629	0.0887282	0.0335103	0.492223		0.207031
0.0335103		0.0335103	0.0335103	0.0105631	0.0042253		0.0929162	0.103516	0.0335103	0.0335103	0.135205	0.0823906	0.0380269	0.325333	0.190131	0.149993	0.0380269	0.101404	0.475322		0.650664
0.0042253		0.0335103	0.0338017	0.0105631	0.0274639		0.118257	0.114079	0.0992909	0.0992913	0.116192	0.576728	0.0380269	0.0739403	0.0697152	0.0169009	0.0335103	0.031689	0.24717		0.0802782
0.105629		0.0739403	0.0335103	0.0335103	0.0760529		0.0295647	0.0084505	0.0335103	0.0464771	0.198581	0.0887282	0.0105631	0.0443645	0.122529	0.0335103	0.0063379	0.0971787	0.0866157		0.458422
0.0760529		0.179568	0.135205	0.0335103	0.27252		0.10981	0.13098	0.0190134	0.0591524	0.0295765	0.0654902	0.0507022	0.137317	0.143654	0.0042253	0.0802782	0.0401393	0.145767		0.344345
0.0042253		0.0335103	0.031689	0.0042253	0.0042253		0.19639	0.228156	0.0528147	0.376034	0.16478	0.169005	0.0570397	0.0549274	0.0042253	0.095066	0.0570397	0.0971787	0.502785		0.0380269
0.0485898		0.0335103	0.0335103	0.0335103	0.0338017		0.154155	0.0718279	0.0105631	0.0845035	0.0126757	0.0147883	0.177455	0.0971787	0.0464771	0.0042253	0.0211261	0.221819	0.253506		0.274632
0.061265		0.0232386	0.0335103	0.0335103	0.0190134		0.103475	0.177455	0.154217	0.392934	0.0169009	0.103516	0.109854	0.175343	0.0760529	0.0147883	0.0338017	0.0169009	0.27252		0.0866157
0.0042253		0.0335103	0.0335103	0.0335103	0.135205		0.215395	0.0887282	0.188018	0.0528147	0.0335103	0.0718279	0.0401393	0.0338017	0.0335103	0.090841	0.0338017	0.109854	0.25562		0.0295765
0.0823906		0.0335103	0.213368	0.0335103	0.790091		0.164714	0.0274639	0.137317	0.0845035	0.133092	0.158443	0.0380269	0.344345	0.0887282	0.122529	0.179568	0.0105631	0.0570397		0.0042253
0.331671		0.257732	0.0335103	0.0335103	0.0169009		0.280857	0.0887282	0.158443	0.0042253	0.0739403	0.149993	0.0126757	0.0760529	0.0485894	0.0380269	0.0335103	0.042252	0.299982		0.0528147
0.0718279		0.0335103	0.0335103	0.0335103	0.0105631		0.0485701	0.042252	0.0971787	0.0063379	0.0274639	0.0654902	0.0232386	0.103516	0.0570397	0.190131	0.0211261	0.0929534	0.259844		0.234494
0.0549274		0.0335103	0.0443645	0.0335103	0.0823906		0.0316762	0.126754	0.124642	0.0697152	0.162668	0.0274639	0.0633774	0.114079	0.0335103	0.198581	0.118304	0.0929534	0.116192		0.090841
0.0042253		0.0335103	0.0042253	0.0042253	0.382371		0.0886926	0.0443645	0.105629	0.0401393	0.0169009	0.0084505	0.0295765	0.0464771	0.0887282	0.0169009	0.031689	0.223931	0.234494		0.211256
0.0718279		0.0335103	0.0042253	0.0147883	0.0335103		0.0274529	0.0528147	0.295757	0.198581	0.0211261	0.0211261	0.0063379	0.0042253	0.192243	0.0211261	0.0169009	0.0335103	0.245057		0.0359142
0.0211261		0.031689	0.94641	0.0042253	0.0042253		0.0527936	0.0190134	0.0105631	0.179568	0.031689	0.0570401	0.0042253	0.226044	0.061265	0.0335103	0.382371	0.177455	0.190131		0.0169009
0.0335103		0.0335103	0.0335103	0.0335103	0.0147883		0.175273	0.0084505	0.152105	0.0274639	0.0084505	0.0126757	0.0169009	0.0654902	0.0528147	0.226044	0.0443645	0.312658	0.43096		0.0338017
0.143654		0.0335103	0.0063379	0.0335103	0.0063379		0.0042236	0.0633778	0.0507022	0.359134	0.0126757	0.090841	0.0232386	0.135205	0.0380269	0.0084505	0.363359	0.0105631	0.426734		0.17323
0.0464771		0.0335103	0.0335103	0.0335103	0.526021		0.0335103	0.105629	0.0335103	0.126754	0.0042253	0.124642	0.0507022	0.185906	0.0443645	0.0105631	0.0042253	0.141542	0.0549274		0.15633
0.122529		0.0380269	0.0063379	0.0335103	0.0464771		0.0760225	0.0401393	0.107741	0.373922	0.0929534	0.0760529	0.0507022	0.0718279	0.0380269	0.0401393	0.454197	0.109854	0.0781655		0.042252
0.126754		0.0335103	0.143654	0.0335103	0.0063379		0.0335103	0.26407	0.169005	0.095066	0.0042253	0.0232386	0.0126757	0.359134	0.0190134	0.179568	0.0823906	0.0335103	0.084503		0.0147883
0.0042253		0.0335103	0.0063379	0.0042253	0.0147883		0.0063354	0.304208	0.359134	0.0929534	0.0063379	0.13098	0.0084505	0.124642	0.0084505	0.730938	0.0211261	0.0760529	0.166893		0.0443645
0.0739403		0.0335103	0.0084505	0.0335103	0.0042253		0.0335103	1.04147	0.0335103	0.0739403	0.0654902	0.149993	0.198581	0.0654902	0.477435	0.0063379	0.149993	0.175343	0.0507022		0.0190134
0.200693		0.0335103	1.13444	0.226044	0.0147883		0.101363	0.0591524	0.0739403	0.0335103	0.149993	0.0211261	0.0335103	0.23872	0.0676026	0.0443645	0.139429	0.0485898	0.152105		0.0781655
0.0633778		0.221819	0.118304	0.0335103	0.0443645		0.0401232	0.395046	0.0335103	0.0760529	0.0887282	0.0169009	0.0063379	0.0335103	0.0697152	0.0105631	0.318996	0.0190134	0.0718279		0.0654902
0.15633		0.0335103	0.0295765	0.13098	0.0380269		0.0042236	0.0084505	0.0718279	0.0147883	0.228156	0.0464771	0.0190134	0.0335103	0.0338017	0.0295765	0.0760529	0.0401393	0.238719		0.0507022
0.0084505		0.0084505	0.0084505	0.0335103	0.0063379		0.223841	0.149993	0.0591524	0.107741	0.145767	0.0507022	0.031689	0.175343	0.236606	0.0211261	0.137317	0.0359142	1.09218		0.0295765
0.105629		0.0335103	0.0335103	0.0335103	0.0338017		0.111922	0.192244	0.171118	0.090841	0.471097	0.154217	0.0591524	0.204918	0.0359142	0.192244	0.238719	0.0591524	0.0105631		0.0338017
0.13098		0.0335103	0.0335103	0.0335103	0.198581		0.0190059	0.031689	0.0274639	0.095066	0.0335103	0.107741	0.0380269	0.23872	0.095066	0.0335103	0.0971787	0.0232386	0.257732		0.242944
0.118304		0.0042253	0.031689	0.0335103	0.0528147		0.190055	0.0697152	0.0063379	0.0335103	0.209143	0.0866157	0.0823906	0.0335103	0.0169009	0.0359142	0.0718279	0.0760529	0.130979		0.50701
0.0147883		0.0335103	0.283083	0.18168	0.0654902		0.0335103	0.0338017	0.0084505	0.25562	0.143654	0.0169009	0.133092	0.0169009	0.0718279	0.0232386	0.245057	0.0528147	0.0042253		0.492223
0.0335103		0.0042253	0.0335103	0.0042253	0.798532		0.0105589	0.0528147	0.0718279	0.211256	0.0063379	0.0274639	0.0359142	0.103516	0.0169009	0.0823906	0.392934	0.213369	0.145767		0.198581
0.0274639		0.0335103	0.0335103	0.0335103	0.0063379		0.128815	0.485885	0.0338017	0.893605	0.0549274	0.0126757	0.0528147	0.0802782	0.0274639	0.0335103	0.342233	0.137317	0.0549274		0.0485894
0.441523		0.0335103	0.0335103	0.0042253	0.0084505		0.0063354	0.116192	0.0485894	0.0335103	0.154217	0.0169009	0.0295765	0.249282	0.0802782	0.0335103	0.27252	0.249282	0.0802782		0.177455
0.0274639		0.0211261	0.0232386	0.0335103	0.042252		0.240735	0.209143	0.0084505	0.0084505	0.0507022	0.0335103	0.0190134	0.116192	0.0570397	0.0929534	0.547143	0.0654902	0.095066		0.238719
0.0335103		0.0335103	0.0335103	0.0335103	0.0335103		0.042235	0.031689	0.0528147	0.0697152	0.259844	0.0335103	0.0866157	0.23872	0.128867	0.0063379	0.0971787	0.124642	0.0718279		0.0063379
0.111967		0.0335103	0.60207	0.0335103	0.0739403		0.0335103	0.0084505	0.0335103	0.395046	0.061265	0.0338017	0.0335103	0.137317	0.0633774	0.217594	0.209143	0.0335103	0.15633		0.278857
0.109854		0.0591524	0.0335103	0.0063379	0.0042253		0.0401232	0.555598	0.141542	0.384484	0.0253512	0.0147883	0.0335103	0.0992913	0.0380269	0.0105631	0.0084505	0.268294	0.0866157		0.0697152
0.232381		0.0591524	0.0335103	0.0335103	0.0295765		0.0760225	0.0929534	0.095066	0.0042253	0.18168	0.0126757	0.15633	0.139429	0.0190134	0.0105631	0.0633774	0.211256	0.0781655		0.667567
0.299982		0.0335103	0.122529	0.0335103	0.171118		0.0335103	0.139429	0.16478	0.183793	0.0633774	0.0335103	0.240832	0.312658	0.0971787	0.0335103	0.0211261	0.0211261	0.158443		0.0676026
0.0042253		0.0084505	0.329558	0.0335103	0.0335103		0.0042236	0.23872	0.137317	0.090841	0.084503	0.192244	0.152105	0.0781655	0.0633774	0.0169009	0.219706	0.15633	0.160555		0.635872
0.211256		0.0063379	0.0443645	0.0335103	0.0084505		0.0335103	0.0507022	0.283083	0.314771	0.365471	0.114079	0.061265	0.0126757	0.166893	0.24717	0.30632	0.031689	0.25562		0.318996
0.116192		0.0335103	0.0147883	0.0335103	0.0654902		0.0063354	0.0591524	0.0063379	0.0549274	0.0992909	0.042252	0.0507022	0.0443645	0.0190134	0.0464771	0.15633	0.0549274	0.304207		0.0338017
0.373922		0.589402	0.517572	0.0335103	0.0042253		0.0168942	0.0295765	0.118304	0.452085	0.135205	0.169005	0.118304	0.24717	0.0971787	0.0507022	0.217594	0.031689	0.230269		0.207031
0.111967		0.0295765	0.031689	0.659107	0.0485894		0.114033	0.0697152	0.169005	0.23872	0.139429	0.0633778	0.219706	0.0992913	0.0253512	0.0338017	0.101403	0.0084505	0.202806		0.120417
0.0335103		0.0718279	0.0335103	0.0335103	0.0401393		0.0844695	0.0507022	0.061265	0.0676026	0.0084505	0.0274639	0.0335103	0.384484	0.0335103	0.101404	0.105629	0.196469	0.194356		0.0528147
0.175343		0.0063379	0.0335103	0.0335103	0.0063379		0.0335103	0.0718279	0.0464771	0.0190134	0.0190134	0.0042253	0.53448	0.213369	0.0126757	0.0464771	0.0464771	0.0845035	0.139429		0.0443645
0.0147883		0.0335103	0.0232386	0.0335103	0.0335103		0.0335103	0.202806	0.0335103	0.285196	0.0887282	0.0570401	0.0042253	0.111967	0.0211261	0.0042253	0.0042253	0.141542	0.350683		0.0042253
0.0443645		0.0335103	0.0335103	0.0063379	0.0084505		0.0929162	0.234494	0.578842	0.0169009	0.145767	0.16478	0.0169009	0.95274	0.0570397	0.371808	0.0335103	0.101404	0.230269		0.0549274
0.042252		0.0063379	0.0190134	0.0335103	0.16478		0.128815	0.0338017	0.0380269	0.0528147	0.0485894	0.0929534	0.0232386	0.274632	0.0338017	0.0335103	0.0253512	0.0338017	0.0528147		0.118304
0.0528147		0.0335103	0.0866157	0.0335103	0.0464771		0.168937	0.122529	0.0633774	0.0866157	0.192243	0.0464771	0.0211261	0.371808	0.162668	0.111967	0.0443645	0.0718279	0.0335103		0.090841
0.0253514		0.0335103	0.0718279	0.166893	0.0335103		0.0190059	0.149993	0.0359142	0.352797	0.207031	0.0380269	0.0823906	0.0211261	0.128867	0.0335103	0.0359142	0.15633	0.409835		0.217594
0.0929534		0.0335103	0.0190134	0.0335103	0.0401393		0.147821	0.185906	0.0274639	0.0335103	0.101403	0.0335103	0.0084505	0.0887282	0.0211261	0.0464771	0.0823906	0.198581	0.0338017		0.190131
0.859808		0.0335103	0.0507022	0.0335103	0.399271		0.0042236	0.0126757	0.0485894	0.0739403	0.0190134	0.388709	0.0443645	0.24717	0.0169009	0.0253514	0.0676026	0.090841	0.661215		0.0042253
0.228156		0.124642	0.0335103	0.0042253	0.0105631		0.0042236	0.0335103	0.0359142	0.0549274	0.0718279	0.0274639	0.0464771	0.0443645	0.111967	0.149993	0.0063379	0.0147883	0.0253512		0.0084505
0.547143		0.0126757	0.0335103	0.0335103	0.0042253		0.0316762	0.103516	0.287308	0.0633778	0.0697152	0.0211261	0.107741	0.13098	0.0338017	0.0232386	0.0232386	0.213369	0.0147883		0.122529
0.120417		0.0335103	0.0335103	0.0338017	0.0274639		0.177384	0.0042253	0.105629	0.169005	0.0253512	0.0887282	0.0335103	0.196469	0.0549274	0.0335103	0.0274639	0.0335103	0.0676026		0.0929534
0.0697152		0.0295765	0.0654902	0.236606	0.285195		0.0844695	0.0084505	0.145767	0.0633778	0.0485894	0.0169009	0.0359142	0.0335103	0.0169009	0.0823906	0.202806	0.0253514	0.0295765		0.143654
0.0042253		0.228156	0.0335103	0.0042253	0.0042253		0.0971394	0.0570401	0.0335103	0.0063379	0.177455	0.0042253	0.0335103	0.13098	0.0380269	0.0823906	0.162668	0.0718279	0.24717		0.0338017
0.0992913		0.0042253	0.031689	0.0335103	0.0485894		0.0654639	0.031689	0.0549274	0.0335103	0.031689	0.0147883	0.0063379	0.0718279	0.141542	0.0971787	0.0992909	0.0485898	0.25562		0.0485894
0.109854		0.0335103	0.031689	0.0335103	0.0760529		0.187943	0.16478	0.042252	0.0507022	0.18168	0.0507022	0.031689	0.75839	0.0335103	0.175343	0.0443645	0.169005	0.0211261		0.0169009
0.128867		0.0105631	0.31477	0.0335103	0.0335103		0.0335103	0.0063379	0.0274639	0.175343	0.0739403	0.0401393	0.0823906	0.0464771	0.0063379	0.133092	0.0760529	0.0887282	0.15633		0.0105631
0.0042253		0.312658	0.0335103	0.479548	0.0042253		0.22173	0.0147883	0.095066	0.0866157	0.126754	0.0802782	0.0126757	1.03936	0.0295765	0.0570401	0.392934	0.0042253	0.0126757		0.0232386
0.031689		0.0042253	0.0335103	0.0335103	0.0507022		0.0190059	0.0464771	0.103516	0.221819	0.0147883	0.0654902	0.0718279	0.0190134	0.107741	0.0760529	0.111967	0.0528147	0.143654		0.209143
0.0335103		0.0084505	0.0485894	0.0335103	0.042252		0.126703	0.0335103	0.242944	0.107741	0.0084505	0.0464771	0.0211261	0.0084505	0.335896	0.061265	0.169005	0.0169009	0.042252		0.551376
0.179568		0.0335103	0.0338017	0.0042253	0.031689		0.257628	0.0676026	0.0781655	0.228156	0.061265	0.29787	0.0591524	0.0549274	0.042252	0.0211261	0.0633774	0.0654902	0.126754		0.0380269
0.462647		0.0335103	0.773185	0.0274639	0.145767		0.0865812	0.143654	0.0359142	0.0866157	0.061265	0.0570401	0.101403	0.280971	0.382371	0.536585	0.0718279	0.25562	0.15633		0.0335103
0.209143		0.0042253	0.0380269	0.0335103	0.0084505		0.0084472	0.0042253	0.0338017	0.0063379	0.223931	0.0823906	0.0992909	0.042252	0.095066	0.095066	0.133092	0.0549274	0.0335103		0.183793
0.095066		0.49856	0.0335103	0.0335103	0.0190134		0.211172	0.310545	0.261957	0.0866157	0.0211261	0.0190134	0.0380269	0.331671	0.0105631	0.095066	0.530255	0.109854	0.593627		0.137317
0.0676026		0.154217	0.0335103	0.0335103	0.0042253		0.0675757	0.0335103	0.090841	0.0528147	0.0169009	0.0464771	0.141542	0.785862	0.0591524	0.160555	0.0063379	0.177455	0.17323		0.0359142
0.090841		0.0335103	0.0042253	0.0274639	0.0063379		0.0401232	0.120417	0.0781655	0.321108	0.101403	0.0359142	0.0485894	0.0253514	0.483772	0.101404	0.126754	0.0697152	0.0211261		0.213368
0.0507022		0.0063379	0.673903	0.0042253	0.401384		0.0886926	0.0335103	0.378147	0.18168	0.452085	0.031689	0.0042253	0.221819	0.0549274	0.0760529	0.061265	0.327445	1.01824		0.0253512
0.031689		0.0335103	0.0335103	0.0335103	0.0042253		0.183719	0.266182	0.0232386	0.0464771	0.0335103	0.0105631	0.0274639	0.171118	0.0126757	0.13098	0.0760529	0.061265	0.249282		0.154217
0.0570397		0.0676026	0.061265	0.0335103	0.0211261		0.0253411	0.0549274	0.095066	0.0359142	0.0105631	0.0295765	0.114079	0.0654902	0.333783	0.409835	0.0190134	0.0147883	0.318996		0.31477
0.0760529		0.0105631	0.0335103	0.0335103	0.0295765		0.219618	0.0823906	0.0591524	0.0335103	0.0549274	0.310545	0.0338017	0.232381	0.25562	0.0232386	0.0739403	0.135205	0.0190134		0.183793
0.0084505		0.16478	0.0549274	0.0335103	0.0335103		0.0147823	0.133092	0.0676026	0.0739403	0.0147883	0.162668	0.0042253	0.509124	0.109854	0.0443645	0.042252	0.209143	0.0802782		0.0485894
0.0401393		0.0335103	0.0190134	0.0335103	0.0802782		0.0527936	0.0042253	0.095066	0.342233	0.0253512	0.0591524	0.0485894	0.0084505	0.308433	0.0823906	0.0549274	0.325333	0.395046		0.289419
0.0633778		0.0335103	0.0335103	0.0335103	0.0042253		0.0992515	0.23872	0.0063379	0.468985	0.101403	0.0335103	0.333783	0.665445	0.0169009	0.0507022	0.122529	0.192244	0.152105		0.0211261
0.126754		0.0335103	0.0335103	0.0335103	0.0063379		0.0335103	0.0760529	0.109854	0.031689	0.0697152	0.409835	0.0570397	0.819673	0.158443	0.0126757	0.0866157	0.0401393	0.0676026		0.0147883
0.0591524		0.0335103	0.0169009	0.0335103	0.0676026		0.538487	0.18168	0.0654902	0.0485898	0.0190134	0.0359142	0.0295765	0.0084505	0.0335103	0.338008	0.0697152	0.0211261	0.154217		0.0823906
0.0676026		0.226044	1.34144	0.031689	0.0042253		0.033788	0.0781655	0.084503	0.114079	0.124642	0.0338017	0.0042253	0.042252	0.0042253	0.0697152	0.0697152	0.496448	0.325333		0.124642
0.228156		0.0335103	0.0335103	0.0335103	0.14788		0.0316762	0.204918	0.090841	0.0084505	0.0126757	0.0295765	0.223931	0.0338017	0.0253512	0.0380269	0.202806	0.0063379	0.0232386		0.188018
0.0335103		0.0211261	0.0335103	0.0042253	0.0676026		0.0358998	0.0063379	0.0335103	0.228156	0.0084505	0.0211261	0.0380269	0.114079	0.403496	0.230269	0.095066	0.0739403	0.0676026		0.124642
0.299982		0.0335103	0.0335103	0.185906	0.0335103		0.278745	0.291533	0.0464771	0.228156	0.0295765	0.0335103	0.0528147	0.471097	0.0126757	0.616861	0.0211261	0.528135	0.464759		0.0190134
0.0485898		0.0485898	0.0335103	0.0335103	0.0105631		0.0105589	0.118304	0.0443645	0.0887282	0.0591524	0.0464771	0.137317	0.042252	0.0335103	0.536585	0.103516	0.0105631	0.261957		0.513347
0.226044		0.0335103	0.0105631	0.0335103	0.031689		0.194278	0.061265	0.0084505	0.0084505	0.0359142	0.0335103	0.25562	0.143654	0.122529	0.0485898	0.143654	0.0211261	0.105629		0.0802782
0.0335103		0.0464771	0.0335103	0.0105631	0.477435		0.0335103	0.107741	0.0335103	0.061265	0.0528147	0.0401393	0.0802782	0.308433	0.0063379	0.0253514	0.0335103	0.0335103	0.149993		0.0169009
0.299982		0.0335103	0.0190134	0.0335103	0.0295765		0.568044	0.0485898	0.183793	0.0401393	0.0549274	0.0676026	0.0335103	0.0528147	0.0718279	0.285196	0.0169009	0.0697152	0.198581		0.042252
0.0464771		0.0042253	0.0295765	0.0335103	0.232381		0.0042236	0.133092	0.0105631	0.0063379	0.0971787	0.0190134	0.061265	0.122529	0.130979	0.120417	0.031689	0.0063379	0.0401393		0.0335103
0.557709		0.084503	0.122529	0.0335103	0.0739403		0.426563	0.338008	0.0549274	0.242945	0.111967	0.0042253	0.190131	0.0335103	0.0105631	0.0464771	0.084503	0.0380269	0.0654902		0.0274639
0.141542		0.0335103	0.0591524	0.0335103	0.122529		0.179496	0.120417	0.0335103	0.116192	0.122529	0.0063379	0.0190134	0.0105631	0.211256	0.143654	0.0063379	0.392934	0.228156		0.350683
0.0042253		0.143654	0.0549274	0.0169009	0.0570397		0.0844695	0.69925	0.0147883	0.0253514	0.185906	0.0042253	0.285195	0.0042253	0.042252	0.576728	0.0042253	0.304208	0.095066		0.0295765
0.137317		0.0335103	0.0335103	0.0485898	0.0042253		0.0464584	0.15633	0.0992909	0.316883	0.0211261	0.0335103	0.0971787	0.0866157	0.0335103	0.0042253	0.0335103	0.0528147	0.190131		0.0781655
0.0335103		0.287308	0.0335103	0.0335103	0.0335103		0.0335103	0.49011	0.0063379	0.0335103	0.209143	0.031689	0.175343	0.335896	0.0126757	0.0169009	0.0335103	0.190131	0.0802782		0.101403
0.118304		0.0232386	0.215481	0.0335103	0.169005		0.223841	0.266182	0.0042253	0.090841	0.18168	0.116192	0.177455	0.0335103	0.118304	0.513347	0.18168	0.135205	0.084503		0.0591524
0.0335103		0.0063379	0.0105631	0.0335103	0.031689		0.0084472	0.13098	0.0335103	0.0992913	0.190131	0.0507022	0.0401393	0.139429	0.0760529	0.133092	0.0335103	0.0335103	0.0401393		0.0338017
0.361247		0.0084505	1.26328	0.0042253	0.0190134		0.0274529	0.107741	0.221819	0.352797	0.494335	0.0126757	0.0654902	0.0169009	0.0084505	0.32322	0.0105631	0.0845035	0.0126757		0.0084505
0.0063379		0.0335103	0.0335103	0.171118	0.15633		0.0274529	0.0105631	0.0528147	0.0549274	0.162668	0.0295765	0.0802782	0.135205	0.122529	0.502786	0.0781655	0.270407	0.43096		0.0697152
0.0549274		0.0169009	0.0335103	0.0042253	0.0126757		0.0084472	0.0443645	0.0147883	0.185906	0.107741	0.13098	0.0443645	0.0781655	0.357021	0.109854	0.16478	0.466872	0.109854		0.095066
0.0335103		0.118304	0.0274639	0.0335103	0.0084505		0.185831	0.0718279	0.338008	0.0253514	0.103516	0.0739403	0.175343	0.031689	0.0528147	0.128867	0.0335103	0.124642	0.217594		0.179568
0.302095		0.105629	0.109854	0.0335103	0.126754		0.0760225	0.23872	0.0147883	0.0528147	0.0760529	0.0063379	0.0105631	0.160555	0.042252	0.0232386	0.194356	0.0335103	0.0190134		0.0359142
0.152105		0.0335103	0.0335103	0.0042253	0.352795		0.0335103	0.031689	0.0253512	0.0105631	0.0169009	0.0380269	0.0549274	0.299982	0.234494	0.149993	0.154217	0.0845035	0.061265		0.0253512
0.090841		0.0253514	0.0042253	0.0335103	0.0169009		0.0105589	0.042252	0.0718279	0.0295765	0.0042253	0.17323	0.111967	0.0401393	0.0335103	0.175343	0.0739403	0.128867	0.116192		0.0042253
0.0084505		0.0335103	0.0084505	0.0335103	0.109854		0.0929162	0.249282	0.0507022	0.0591524	0.0401393	0.0485898	0.190131	0.0335103	0.0697152	0.0866157	0.0335103	0.680242	0.30632		0.749956
0.411946		0.095066	0.0253512	0.669674	0.0105631		0.745434	0.43941	0.29787	0.0359142	0.0443645	0.169005	0.0760529	0.373922	0.0190134	0.268294	0.15633	0.061265	0.999223		0.0253512
0.031689		0.0335103	0.166893	0.0063379	0.0063379		0.0105589	0.0335103	0.27252	0.0335103	0.084503	0.194356	0.130979	0.0802782	0.0866157	0.416172	0.0063379	0.217594	0.15633		0.0654902
0.0126757		0.0335103	0.0335103	0.0169009	0.0335103		0.0232294	0.169005	0.0084505	0.0147883	0.17323	0.0528147	0.0697152	0.0126757	0.111967	0.0697152	0.042252	0.209143	0.409835		0.547143
0.464759		0.0464771	0.0335103	0.0190134	0.0147883		0.0844695	0.0528147	0.103516	0.0126757	0.0359142	0.0697152	0.0169009	0.0335103	0.312658	0.23872	0.207031	0.114079	0.371808		0.376034
0.0507022		0.0335103	0.0335103	0.0380269	0.0063379		0.0760225	0.0335103	0.0802782	0.0335103	0.0633774	0.0169009	0.0338017	0.0335103	0.264069	0.0549274	0.145767	0.207031	0.122529		0.0042253
0.0443645		0.661233	0.342233	0.0042253	0.0335103		0.0380116	0.0190134	0.0211261	0.0042253	0.0507022	0.0401393	0.158443	0.120417	0.399271	0.0211261	0.120417	0.47321	0.232381		0.475322
0.0507022		0.276745	0.0335103	0.0335103	0.118304		0.0042236	0.0105631	0.0359142	0.122529	0.0147883	0.0335103	0.654886	0.295758	0.0380269	0.128867	0.0042253	0.0126757	0.090841		0.149993
0.0190134		0.0335103	0.0063379	0.0335103	0.0335103		0.143597	0.445748	0.316883	0.0335103	0.234494	0.861908	0.0084505	0.0084505	0.095066	0.135205	0.204918	0.0359142	0.0401393		0.316883
0.0042253		0.0528147	0.0335103	0.0335103	0.0126757		0.0358998	0.0335103	0.521797	0.114079	0.0147883	0.0042253	0.0232386	0.0042253	0.0105631	0.095066	0.095066	0.0211261	0.477435		0.0126757
0.0063379		0.0335103	0.0335103	0.0126757	0.0295765		0.0232294	0.185906	0.0739403	0.0084505	0.0190134	0.0042253	0.0063379	0.0169009	0.0105631	0.280971	0.228156	0.0063379	0.111967		0.145767
0.0507022		0.0335103	0.0335103	0.0335103	0.061265		0.139374	0.0232386	0.0042253	0.217594	0.0335103	0.0063379	0.0485894	0.0190134	0.257732	0.223931	0.0485894	0.0718279	0.120417		0.228156
0.526021		0.0335103	0.0335103	0.0335103	0.0335103		0.249182	0.0126757	0.209143	0.107741	0.152105	0.0042253	0.101403	0.0380269	0.0676026	0.226044	0.5725	0.169005	0.105629		0.084503
0.0338017		0.0335103	0.0232386	0.0042253	0.0063379		0.0527936	0.0211261	0.0528147	0.207031	0.0823906	0.0528147	0.188018	0.0633778	0.0739403	0.0866157	0.14788	0.149993	0.0084505		0.0126757
1.1788		0.0335103	0.378147	0.0335103	0.152105		0.0190059	0.0760529	0.0697152	0.249282	0.0169009	0.0359142	0.111967	0.43941	0.0739403	0.0485898	0.0887282	0.0654902	0.232381		0.0464771
0.0169009		0.0253514	0.204918	0.0676026	0.927403		0.0063354	0.0866157	0.139429	0.26407	0.0190134	0.14788	0.137317	0.390821	0.0549274	0.0443645	0.192243	0.0335103	0.0359142		0.14788
0.0147883		0.0042253	0.0335103	0.0042253	0.0295765		0.0253411	0.0042253	0.335896	0.289421	0.0042253	0.169005	0.293645	0.0443645	0.0335103	0.061265	0.0335103	0.223931	0.166893		0.0697152
0.0338017		0.0335103	0.124642	0.0887282	0.0335103		0.0274529	0.386597	0.130979	0.158443	0.0485894	0.299982	0.0380269	0.0380269	0.0169009	0.477435	0.0528147	0.0335103	0.202806		0.143654
0.090841		0.0295765	0.0335103	0.0042253	0.0335103		0.0971394	0.401384	0.0211261	0.095066	0.0992909	0.0760529	0.333783	0.228156	0.0063379	0.141542	0.287308	0.0042253	0.0063379		0.158443
0.185906		0.0335103	0.0335103	0.0335103	0.143654		0.147821	0.25562	0.0443645	0.0697152	0.0633774	0.0654902	0.0211261	0.217594	0.0335103	0.169005	0.0232386	0.0335103	0.230269		0.162668
0.0633778		0.0126757	0.0335103	0.0042253	0.0211261		0.42234	0.13098	0.0190134	0.0063379	0.160555	0.0359142	0.0335103	0.0549274	0.0528147	0.283083	0.139429	0.0084505	0.0528147		0.902044
0.0781655		0.0335103	0.0335103	0.0126757	0.0335103		0.0443466	0.236606	0.158443	0.0464771	0.0676026	0.0718279	0.114079	0.0866157	0.162668	0.122529	0.0253512	0.192244	0.274632		0.0335103
0.0084505		0.166893	0.0335103	0.0335103	0.0042253		0.0063354	0.384484	0.090841	0.111967	0.031689	0.152105	0.0063379	0.116192	0.185906	0.133092	0.0718279	0.0335103	0.0253512		0.0335103
0.627416		0.0335103	0.0335103	0.0084505	0.118304		0.0464584	0.061265	0.0274639	0.0676026	0.0718279	0.0335103	0.234494	0.386597	0.185906	0.0295765	0.139429	0.128867	0.0676026		0.0169009
0.031689		0.0443645	0.124642	0.0335103	0.302095		0.0335103	0.15633	0.0126757	0.126754	0.183793	0.0147883	0.103516	0.259844	0.101403	0.0887282	0.042252	0.0042253	0.179568		0.101403
0.14788		0.0335103	0.0335103	0.0232386	0.308433		0.0211176	0.0866157	0.0211261	0.0335103	0.0443645	0.0042253	0.0718279	0.101404	0.0335103	0.107741	0.0528147	0.0335103	0.354909		0.0676026
0.0718279		0.152105	0.291532	0.0335103	0.0063379		0.0295647	0.137317	0.0253512	0.669674	0.0335103	0.0335103	0.0147883	0.16478	0.0676026	0.0380269	0.16478	0.0105631	0.0485894		0.0274639
0.042252		0.496448	0.0042253	0.0335103	0.145767		0.0126707	0.126754	0.0401393	0.122529	0.0335103	0.0190134	0.0211261	0.162668	0.0335103	0.145767	0.0887282	0.0211261	0.0443645		0.0549274
0.0507022		0.0042253	0.0211261	0.0042253	0.0802782		0.162603	0.031689	0.308433	0.137317	0.0887282	0.0335103	0.0380269	0.109854	0.340121	0.291533	0.0359142	0.160555	0.33167		0.171118
0.105629		0.0295765	0.0084505	0.0084505	0.0105631		0.185831	0.0654902	0.0760529	0.380258	0.0063379	0.494335	0.120417	0.809109	0.107741	0.0718279	0.299982	0.0654902	0.090841		0.245057
0.0528147		0.0335103	0.215481	0.0335103	0.0274639		0.0042236	0.0485898	0.0359142	0.0063379	0.0823906	0.249282	0.145767	0.0507022	0.0380269	0.0823906	0.0126757	0.0335103	0.221819		0.103516
0.0335103		0.0335103	0.0335103	0.0042253	0.0190134		0.0063354	0.133092	0.042252	0.0507022	0.0063379	0.0992913	0.0697152	0.160555	0.0676026	0.0295765	0.16478	0.120417	0.171118		0.031689
0.551376		0.0335103	0.0676026	0.0335103	0.0335103		0.141485	0.0359142	0.0443645	0.0338017	0.0190134	0.0359142	0.0992909	0.0232386	0.0359142	0.0781655	0.118304	0.0591524	0.0633774		0.0485894
0.0042253		0.0042253	0.0335103	0.0335103	0.0084505		0.308309	0.0380269	0.111967	0.0971787	0.0359142	0.101404	0.0739403	0.0105631	0.0042253	0.642204	0.390821	0.0084505	0.124642		0.0042253
0.0485898		0.0042253	0.0335103	0.0105631	0.388709		0.0781341	0.0549274	0.0253512	0.289421	0.185906	0.0528147	0.0380269	0.0802782	0.139429	0.139429	0.226044	0.196469	0.0359142		0.042252
0.321108		0.0335103	0.0105631	0.0063379	0.0335103		0.0084472	0.0464771	0.0063379	0.230269	0.0063379	0.335896	0.0887282	0.274632	0.0063379	0.532365	0.0335103	0.0359142	0.0971787		0.0992909
0.0549274		0.0335103	0.061265	0.0126757	0.0126757		0.0464584	0.0845035	0.061265	0.0866157	0.0042253	0.0335103	0.118304	0.0781655	0.0105631	0.344345	0.0507022	0.0335103	0.0866157		0.304207
0.18168		0.0335103	0.0042253	0.0335103	0.652773		0.0335103	0.122529	0.158443	0.0992913	0.0570397	0.32322	0.0443645	0.236606	0.0335103	0.0507022	0.0507022	0.0718279	0.116192		0.179568
0.859808		0.0335103	0.369696	0.0063379	0.0126757		0.0335103	0.0929534	0.321108	0.316883	0.14788	0.107741	0.0760529	0.291533	0.084503	0.223931	0.251394	0.0359142	0.0169009		0.264069
0.709818		0.209143	0.0335103	0.166893	0.0464771		0.0335103	0.228156	0.128867	0.0335103	0.084503	0.107741	0.0147883	0.135205	0.0507022	0.0823906	0.401384	0.0507022	0.084503		0.0528147
0.0654902		0.0335103	0.0335103	0.0335103	0.128867		0.0316762	0.188018	0.0570397	0.0253514	0.0335103	0.158443	0.0718279	0.120417	0.420397	0.0528147	0.378147	0.0253514	0.0274639		0.232381
0.236606		0.0335103	0.0464771	0.0335103	0.105629		0.143597	0.0211261	0.0464771	0.120417	0.0335103	0.0380269	0.190131	0.133092	0.0253512	0.0781655	0.0866157	0.293645	0.0866157		0.200693
0.0147883		0.118304	0.0781655	0.0042253	0.0335103		0.0844695	0.0042253	0.0232386	0.0147883	0.0971787	0.0866157	0.0232386	0.0338017	0.0253512	0.234494	0.25562	0.090841	0.0992909		0.468985
0.0802782		0.0063379	0.0042253	0.318996	0.149993		0.0168942	0.0147883	0.0295765	0.306321	0.031689	0.0929534	0.0211261	0.0507022	0.0781655	0.0633778	0.0042253	0.293645	0.0253512		0.0760529
0.864034		0.0335103	0.0042253	0.0507022	0.084503		0.0190059	0.0570401	0.0211261	0.359134	0.0443645	0.521799	0.031689	0.0697152	0.0211261	0.124642	0.0335103	0.221819	0.0570397		0.0232386
0.105629		0.0485898	0.0335103	0.0042253	0.0335103		0.0126707	0.253507	0.0211261	0.0042253	0.0335103	0.158443	0.0380269	0.061265	0.0507022	0.0274639	0.0401393	0.145767	0.202806		0.0802782
1.8759		0.0335103	0.230269	0.0335103	0.485885		0.0971394	0.160555	0.0380269	0.149993	0.0335103	0.0335103	0.118304	0.0549274	0.0147883	0.0633778	0.135205	0.141542	0.128867		0.114079
0.124642		0.0335103	0.0335103	0.0335103	0.266182		0.0654639	0.395046	0.0335103	0.357021	0.0169009	0.0380269	0.0169009	0.0105631	0.095066	0.433073	0.135205	0.0169009	0.0335103		0.090841
0.580943		0.0335103	0.0084505	0.0335103	0.576728		0.0147823	0.0380269	0.0295765	0.120417	0.0654902	0.0211261	0.17323	0.293645	0.177455	0.0781655	0.0485894	0.0335103	0.0105631		0.179568
0.124642		0.221819	0.0485894	0.0335103	0.494335		0.0335103	0.0335103	0.0570397	0.095066	0.0591524	0.0485898	0.0042253	0.350683	0.0507022	0.51546	0.0802782	0.0274639	0.090841		0.215481
0.500673		0.0105631	0.0335103	0.0335103	0.0126757		0.0105589	0.0570401	0.0338017	0.0042253	0.090841	0.219707	0.0823906	0.0887282	0.0084505	0.0781655	0.154217	0.0570401	0.0253512		0.162668
0.0697152		0.0335103	0.0335103	0.0042253	0.238719		0.0190059	0.240832	0.0063379	0.042252	0.0485894	0.0042253	0.0464771	0.228156	0.0126757	0.0211261	0.175343	0.0211261	0.688693		0.0760529
0.0443645		0.0335103	0.15633	0.0929534	0.107741		0.0464584	0.149993	0.145767	0.0866157	0.0528147	0.090841	0.0211261	0.0760529	0.0359142	0.0802782	0.0190134	0.0335103	0.107741		0.0570397
0.0147883		0.0335103	0.0335103	0.0335103	0.392934		0.0126707	0.0105631	0.0084505	0.0443645	0.0380269	0.0823906	0.0126757	0.175343	0.0084505	0.0443645	0.0232386	0.0253514	0.316883		0.0084505
2.19699		0.0335103	0.0335103	0.0335103	0.192243		0.0147823	0.122529	0.0147883	0.0464771	0.141542	0.0338017	0.101403	0.0253514	0.0042253	0.0253514	0.118304	0.0335103	0.0823906		0.0190134
0.200693		0.145767	0.0335103	0.0335103	0.652773		0.0380116	0.0063379	0.0295765	0.287308	0.16478	0.126754	0.0042253	0.449973	0.101403	0.160555	0.0042253	0.0335103	0.268294		0.0401393
0.283083		0.0654902	0.0335103	0.0335103	0.293645		0.0380116	0.0359142	0.145767	0.424622	0.192243	0.380258	0.0042253	0.042252	0.0105631	0.0042253	0.0654902	0.0335103	0.103516		0.137317
0.0063379		0.185906	0.169005	0.0335103	0.0211261		0.280857	0.0866157	0.160555	0.162668	0.15633	0.316883	0.133092	0.0253514	0.0335103	0.0591524	0.0042253	0.0654902	0.143654		0.126754
0.0335103		0.0190134	0.0335103	0.0335103	0.0169009		0.050682	0.0190134	0.0485894	0.0845035	0.124642	0.139429	0.118304	0.061265	0.0781655	0.031689	0.0697152	0.0335103	0.0823906		0.152105
0.139429		0.0190134	0.0335103	0.0335103	0.0084505		0.156267	0.122529	0.0380269	0.124642	0.169005	0.0211261	0.0971787	0.166893	0.031689	0.0760529	0.213368	0.276745	0.133092		0.0380269
0.299982		0.0147883	0.0335103	0.0335103	0.0380269		0.0358998	0.466872	0.0528147	0.291533	0.0105631	0.0507022	0.0042253	0.135205	0.0105631	0.0654902	0.122529	0.7246	0.0274639		0.166893
0.0697152		0.0042253	0.0335103	0.0335103	0.673903		0.0147823	0.464761	0.124642	0.061265	0.0232386	0.0105631	0.14788	0.114079	0.0063379	0.0063379	0.200693	0.118304	0.122529		0.0274639
0.0359142		0.0335103	0.111967	0.0845035	0.204918		0.0253411	0.0335103	0.143654	0.120417	0.213368	0.145767	0.0380269	0.188018	0.0507022	0.0335103	0.192243	0.0335103	0.0443645		0.0126757
0.477435		0.0507022	0.0335103	0.0335103	0.0169009		0.232288	0.105629	0.0760529	0.0042253	0.0549274	0.183793	0.0591524	0.0549274	0.40561	0.291533	0.346458	0.0042253	0.280969		0.0147883
0.0042253		0.0042253	0.0591524	0.0335103	0.0335103		0.28508	0.137317	0.0042253	0.0866157	0.0718279	0.0147883	0.0338017	0.859808	0.171118	0.0335103	0.120417	0.0676026	0.593627		0.0887282
0.042252		0.126754	0.0335103	0.0042253	0.0274639		0.133038	0.0507022	0.149993	0.0380269	0.0464771	0.0335103	0.0335103	0.101404	0.0295765	0.435185	0.223931	0.0335103	0.149993		0.0823906
0.0992913		0.242945	0.0633774	0.485885	0.114079		0.0042236	0.107741	0.249282	0.105629	0.0866157	0.0971787	0.0042253	0.0971787	0.160555	0.16478	0.0591524	0.042252	0.0823906		0.555598
0.0335103		0.0335103	0.0335103	0.0335103	0.251394		0.0739109	0.0485898	0.0443645	0.124642	0.114079	0.0335103	0.0335103	0.0335103	0.357021	0.232381	0.0274639	0.042252	0.821772		0.411946
0.0335103		0.175343	0.116192	0.0335103	0.0105631		0.164714	0.0295765	0.0549274	0.0401393	0.031689	0.0781655	0.0570397	0.0443645	0.0570397	0.114079	0.0401393	0.226044	0.0295765		0.16478
0.0335103		0.0335103	0.0042253	0.0335103	0.551376		0.187943	0.190131	0.130979	0.0211261	0.0335103	0.0992913	0.042252	0.0232386	0.152105	0.0823906	0.0697152	0.0464771	0.333783		0.0232386
0.0084505		0.0335103	0.0335103	0.0335103	0.0063379		0.0316762	0.0485898	0.141542	0.0654902	0.0443645	0.0760529	0.0507022	0.042252	0.0335103	0.230269	0.0591524	0.13098	0.145767		0.0760529
		0.0718279	0.0295765	0.0335103	0.392934		0.0063354	0.0169009	0.090841	0.223931	0.128867	0.0359142	0.0380269	0.124642	0.16478	0.0042253	0.0654902	0.171118	0.30632		0.192243
		0.0335103	0.0063379	0.0335103	0.0338017		0.0042236	0.154217	0.0443645	0.152105	0.228156	0.0697152	0.18168	0.213369	0.0105631	0.0042253	0.175343	0.0335103	0.0401393		0.24717
		0.0335103	0.128867	0.0042253	0.0295765		0.0105589	0.23872	0.0169009	0.198581	0.376034	0.0485898	0.0676026	0.200693	0.215481	0.160555	0.0253512	0.0633778	0.0971787		0.124642
		0.0335103	0.0443645	0.259844	0.0042253		0.187943	0.306321	0.0335103	0.0739403	0.0443645	0.0169009	0.124642	0.228156	0.207031	0.13098	0.228156	0.0232386	0.120417		0.0760529
		0.0335103	0.095066	0.0676026	0.0654902		0.0717991	0.0169009	0.0443645	0.0591524	0.0802782	0.109854	0.14788	0.120417	0.0760529	0.0485898	0.395046	0.137317	0.152105		0.031689
		0.0335103	0.0335103	0.0335103	0.0359142		0.0042236	0.120417	0.333783	0.0042253	0.118304	0.0105631	0.194356	0.090841	0.103516	0.226044	0.0929534	0.0084505	0.0887282		0.128867
		0.0335103	0.0335103	0.179568	0.0042253		0.0084472	0.0042253	0.0697152	0.194356	0.0992909	0.0253514	0.0739403	0.0528147	0.204918	0.0190134	0.107741	0.042252	0.179568		0.031689
		0.0335103	0.0335103	0.0335103	0.0359142		0.0401232	0.912604	0.0739403	0.158443	0.219706	0.0866157	0.0528147	0.0464771	0.084503	0.135205	0.0866157	0.223931	0.124642		0.090841
		0.0335103	0.152105	0.0335103	0.0063379		0.25974	0.0169009	0.0042253	0.0866157	0.109854	0.13098	0.211256	0.17323	0.0084505	0.111967	0.0549274	0.0335103	0.0335103		0.0823906
		0.160555	0.0042253	0.0274639	0.0084505		0.0485701	0.0992913	0.0401393	0.0549274	0.0380269	0.0485898	0.118304	0.0042253	0.0443645	0.26407	0.0760529	0.0126757	0.0126757		0.118304
		0.0335103	0.0295765	0.0335103	0.0042253		0.504695	0.0380269	0.0380269	0.0335103	0.0633774	0.0718279	0.0718279	0.116192	0.0549274	0.0676026	0.0335103	0.0042253	0.0335103		0.101403
		0.314771	0.542916	0.0295765	0.0211261		0.0126707	0.0823906	0.103516	0.0866157	0.139429	0.0718279	0.0359142	0.0105631	0.031689	0.0633778	0.0126757	0.0335103	0.162668		0.084503
		0.0335103	0.0335103	0.376034	0.0169009		0.369547	0.0549274	0.031689	0.0335103	0.031689	0.0739403	0.0169009	0.409835	0.0063379	0.0401393	0.0443645	0.0570401	0.0335103		0.211256
		0.0042253	0.0063379	0.0335103	0.31477		0.0591289	0.139429	0.0042253	0.0042253	0.0211261	0.0084505	0.0739403	0.418285	0.0443645	0.0485898	0.0063379	0.217594	0.0335103		0.0105631
		0.0335103	0.107741	0.0335103	0.0335103		0.314645	0.0338017	0.0549274	0.0338017	0.128867	0.0335103	0.0232386	0.190131	0.0084505	0.0866157	0.128867	0.200693	0.376034		0.0443645
		0.0335103	0.0335103	0.0335103	0.0253512		0.344208	0.183793	0.109854	0.0633778	0.0887282	0.0253514	0.042252	0.101404	0.0443645	0.152105	0.0042253	0.0335103	0.851352		0.43096
		0.0802782	0.0335103	0.0335103	0.0335103		0.316756	0.0549274	0.0335103	0.287308	0.103516	0.0335103	0.0971787	0.158443	0.0295765	0.0084505	0.33167	0.0335103	0.103516		0.29787
		0.0295765	0.0335103	0.0335103	0.0335103		0.0950277	0.0633778	0.031689	0.0549274	0.916842	0.0126757	0.0591524	0.101404	0.0232386	0.0147883	0.0338017	0.0485898	0.18168		0.380258
		0.175343	0.0335103	0.0335103	0.0084505		0.120368	0.0042253	0.0507022	0.179568	0.0147883	0.0633778	0.137317	0.0105631	0.0676026	0.0591524	0.0971787	0.0295765	0.169005		0.0084505
		0.0380269	0.0042253	0.0190134	0.149993		0.177384	0.0335103	0.0335103	0.158443	0.192243	0.0335103	0.0464771	0.171118	0.0676026	0.0528147	0.0084505	0.0335103	0.217594		0.249282
		0.0335103	0.166893	0.0335103	0.0084505		0.0084472	0.0335103	0.109854	0.0697152	0.264069	0.0232386	0.0253512	0.0335103	0.130979	0.213369	0.0549274	0.126754	0.095066		0.230269
		0.0335103	0.126754	0.0190134	0.0042253		0.145709	0.437297	0.0232386	0.107741	0.145767	0.0380269	0.031689	0.0042253	0.0190134	0.0359142	0.0380269	0.23872	0.0549274		0.287308
		0.0335103	0.0335103	0.0335103	0.0335103		0.0147823	0.0335103	0.0105631	0.120417	0.095066	0.0781655	0.0359142	0.042252	0.185906	0.107741	0.0549274	0.0335103	0.318996		0.0042253
		0.0335103	0.0992909	0.0335103	0.0063379		0.0190059	0.175343	0.0507022	0.0866157	0.251394	0.0295765	0.101403	0.0380269	0.0401393	0.124642	0.0654902	0.0084505	0.0042253		0.120417
		0.0335103	0.204918	0.149993	0.0485894		0.0232294	0.0169009	0.0464771	0.0335103	0.061265	0.133092	0.278857	0.0105631	0.0274639	0.0380269	0.0929534	0.0335103	0.0211261		0.0971787
		0.0335103	0.0335103	0.0042253	0.0802782		0.063352	0.120417	0.995	0.0760529	0.268294	0.177455	0.111967	0.0570401	0.084503	0.251394	0.0676026	0.177455	0.133092		0.15633
		0.190131	0.468985	0.0084505	0.0654902		0.365325	0.0338017	0.0042253	0.109854	0.152105	0.0359142	0.0253512	0.0718279	0.0126757	0.0654902	0.192243	0.0335103	0.0443645		0.15633
		0.0335103	0.0335103	0.0335103	0.0190134		0.420229	0.0549274	0.0253512	0.0335103	0.202806	0.0823906	0.0335103	0.152105	0.0274639	0.0528147	0.0401393	0.295758	0.185906		0.0335103
		0.462647	0.0335103	0.0338017	0.686583		1.2628	0.0042253	0.0295765	0.232381	0.109854	0.111967	0.031689	0.0253514	0.0464771	0.329558	0.105629	0.0042253	0.344345		0.0232386
		0.0335103	0.0335103	0.0335103	0.124642		0.164714	0.095066	0.0042253	0.126754	0.60207	0.0929534	0.0335103	0.0042253	0.0802782	0.0528147	0.0190134	0.223931	0.0169009		0.031689
		0.0042253	0.0105631	0.0335103	0.166893		0.24707	0.0335103	0.0739403	0.0335103	0.084503	0.0126757	0.502785	0.257732	0.0718279	0.223931	0.109854	0.0105631	0.0802782		0.0126757
		0.0335103	0.0295765	0.061265	0.0335103		0.0105589	0.0507022	0.0781655	0.0042253	0.14788	0.118304	0.031689	0.207031	0.0485894	0.103516	0.0570397	0.095066	0.139429		0.0802782
		0.449973	0.0335103	0.0654902	0.257732		0.120368	0.13098	0.152105	0.228156	0.0042253	0.325333	0.0338017	0.0274639	0.152105	0.0338017	0.0507022	0.0335103	0.101403		0.14788
		0.0591524	0.0335103	0.0591524	0.0359142		0.0232294	0.327445	0.0992909	0.0464771	0.232381	0.0105631	0.0718279	0.0676026	0.105629	0.0866157	0.0338017	0.0042253	0.179568		0.103516
		0.0335103	0.0335103	0.0335103	0.0084505		0.0335103	0.0147883	0.0190134	0.0335103	0.0528147	0.126754	0.0063379	0.236606	0.0591524	0.371808	0.0169009	0.166893	0.105629		0.122529
		0.0335103	0.338008	0.202806	0.0528147		0.10981	0.188018	0.0380269	0.0335103	0.116192	0.0507022	0.0697152	0.109854	0.0866157	0.183793	0.137317	0.0335103	0.0485894		0.219706
		0.0335103	0.0335103	0.0042253	0.0295765		0.105587	0.0676026	0.0147883	0.158443	0.0929534	0.0507022	0.0507022	0.0169009	0.0528147	0.0335103	0.166893	0.0335103	0.124642		0.084503
		0.0042253	0.0654902	0.0335103	0.0232386		0.0126707	0.0335103	0.130979	0.0507022	0.289419	0.143654	0.0443645	0.0335103	0.124642	0.0401393	0.0274639	0.0084505	0.25562		0.0823906
		0.0042253	0.0335103	0.171118	0.502785		0.0295647	0.0295765	0.0528147	0.0802782	0.0866157	0.0654902	0.103516	0.0570401	0.0147883	0.141542	0.318996	0.0335103	0.0295765		0.0042253
		0.0528147	0.0335103	0.0335103	0.0126757		0.173161	0.0401393	0.0274639	0.0126757	0.0335103	0.0823906	0.0147883	0.0335103	0.0697152	0.122529	0.0866157	0.162668	0.0211261		0.114079
		0.0335103	0.0338017	0.219707	0.061265		0.382217	0.128867	0.0485894	0.0190134	0.124642	0.0485898	0.0274639	0.62319	0.15633	0.0591524	0.145767	0.0147883	0.840797		0.0802782
		0.0335103	0.359134	0.0335103	0.0802782		0.0063354	0.124642	0.0443645	0.0781655	0.175343	0.0211261	0.0295765	0.24717	0.0042253	0.0401393	1.12176	0.0507022	0.0929534		0.103516
		0.0335103	0.0042253	0.0335103	0.270407		0.0654639	0.0063379	0.0760529	0.0105631	0.0359142	0.0781655	0.0380269	0.0335103	0.0380269	0.331671	0.143654	0.0845035	0.223931		0.0232386
		0.0335103	0.0190134	0.0335103	0.0147883		0.0654639	0.0549274	0.226044	0.15633	0.0084505	0.122529	0.141542	0.0802782	0.105629	0.0929534	0.0866157	0.0760529	0.251394		0.0802782
		0.0335103	0.0042253	0.0335103	0.177455		0.0316762	0.122529	0.133092	0.733059	0.0528147	0.0633778	0.0147883	0.475323	0.0697152	0.251394	0.31477	0.0190134	0.0335103		0.14788
		0.242945	0.0295765	0.0335103	0.0591524		0.0485701	0.0335103	0.0929534	0.145767	0.111967	0.0274639	0.0042253	0.0084505	0.107741	0.196469	0.190131	0.0335103	0.128867		0.0676026
		0.0335103	0.0335103	0.0335103	0.931617		0.430786	0.0485898	0.0335103	0.0654902	0.0359142	0.0063379	0.0253512	0.13098	0.0126757	0.333783	0.179568	0.139429	0.149993		0.0063379
		0.0335103	0.0335103	0.0169009	0.130979		0.0443466	0.0739403	0.0335103	0.207031	0.0570397	0.0359142	0.264069	0.0147883	0.0211261	0.357021	0.0359142	0.0063379	0.122529		0.0676026
		0.042252	0.0063379	0.0335103	0.0063379		0.0295647	0.0823906	0.0084505	0.0211261	0.0063379	0.373922	0.0295765	0.162668	0.204918	0.190131	0.137317	0.0105631	0.338008		0.107741
		0.0274639	0.0335103	0.0335103	0.5725		0.0527936	0.0401393	0.0042253	0.0335103	0.291532	0.13098	0.0335103	0.369697	0.0823906	0.0147883	0.122529	0.0126757	0.346458		0.031689
		0.0335103	0.536585	0.0335103	0.0335103		0.0549053	0.139429	0.0335103	0.0335103	0.0335103	0.107741	0.031689	0.401384	0.0274639	0.158443	0.304207	0.0042253	0.0335103		0.0971787
		0.0335103	0.0335103	0.454197	0.198581		0.0335103	0.0570401	0.0232386	0.166893	0.0380269	0.0401393	0.0739403	0.154217	0.0169009	0.532365	0.116192	0.095066	0.118304		0.0147883
		0.188018	0.0335103	0.0335103	0.090841		0.0380116	0.139429	0.0464771	0.0443645	0.0232386	0.061265	0.198581	0.0971787	0.120417	0.407722	0.0929534	0.314771	0.0105631		0.18168
		0.604193	0.342233	0.0335103	0.107741		0.0802458	1.24005	0.0084505	0.177455	0.130979	0.0380269	0.0464771	0.232381	0.111967	0.17323	0.918943	0.0507022	0.0401393		0.266182
		0.0063379	0.0063379	0.0335103	0.221819		0.0992515	0.0718279	0.0042253	0.0335103	0.251394	0.0084505	0.042252	0.061265	0.0866157	0.0084505	0.090841	0.175343	0.177455		0.0528147
		0.0335103	0.0335103	0.0335103	0.278857		0.0612406	0.0549274	0.27252	0.0335103	0.0335103	0.0507022	0.0866157	0.0253514	0.0781655	0.0295765	0.111967	0.0359142	0.190131		0.0232386
		0.114079	0.0335103	0.126754	0.166893		0.0570172	0.152105	0.0549274	0.0147883	0.109854	0.0633778	0.0126757	0.295758	0.0359142	0.0335103	0.213368	0.0274639	0.16478		0.232381
		0.0063379	0.0232386	0.0335103	0.0084505		0.042235	0.0335103	0.109854	0.0084505	0.0866157	0.0549274	0.0105631	0.0338017	0.0147883	0.101404	0.204918	0.230269	0.0169009		0.0147883
		0.0042253	0.160555	0.0042253	0.101403		0.0570172	0.124642	0.122529	0.109854	0.447859	0.122529	0.0335103	0.0335103	0.0084505	0.0042253	0.0823906	0.0042253	0.0335103		0.126754
		0.0335103	0.0335103	0.0335103	0.0335103		0.0464584	0.0335103	0.090841	0.0549274	0.437297	0.145767	0.0335103	0.0676026	0.120417	0.101404	0.135205	0.0335103	0.32322		0.122529
		0.169005	0.0528147	0.0105631	0.439409		0.0232294	0.0335103	0.0401393	0.0359142	0.0781655	0.090841	0.0335103	0.226044	0.0335103	0.0676026	0.496448	0.0591524	0.0507022		0.0042253
		0.0042253	0.0549274	0.0335103	0.0485894		0.0654639	0.198581	0.105629	0.0335103	0.0063379	0.061265	0.0359142	0.0063379	0.0359142	0.031689	0.304207	0.0633778	0.18168		0.0739403
		0.0335103	0.179568	0.0335103	0.0042253		0.0274529	0.179568	0.0335103	0.149993	0.122529	0.0335103	0.0253512	0.0485898	0.0739403	0.0401393	0.0147883	0.0401393	0.441521		0.105629
		0.0063379	0.084503	0.0084505	0.0485894		0.141485	0.0464771	0.0063379	0.0633778	0.061265	0.0528147	0.0380269	0.133092	0.0105631	0.111967	0.278857	0.0823906	0.128867		0.095066
		0.0063379	0.0084505	0.0335103	0.0063379		0.158379	0.0232386	0.228156	0.13098	0.445746	0.0718279	0.24717	0.295758	0.031689	0.185906	0.0528147	0.0802782	0.0887282		0.171118
		0.0169009	0.333783	0.0335103	0.0042253		0.280857	0.124642	0.042252	0.0042253	0.116192	0.0739403	0.128867	0.0697152	0.0485894	0.0084505	0.48166	0.200693	0.0063379		0.0295765
		0.0335103	0.0507022	0.0335103	0.0042253		0.25974	0.0190134	0.0380269	0.0105631	0.0866157	0.0253514	0.0211261	0.111967	0.0105631	0.0507022	0.118304	0.137317	0.33167		0.0739403
		0.0335103	0.270407	0.29787	0.0063379		0.177384	0.295758	0.0084505	0.249282	0.0335103	0.133092	0.175343	0.0380269	0.564056	0.118304	0.0464771	0.523913	0.0570397		0.0335103
		0.378147	0.0335103	0.0335103	0.16478		0.177384	0.0042253	0.0464771	0.378147	0.0211261	0.0335103	0.0274639	0.124642	0.107741	0.0718279	0.103516	0.198581	0.0335103		0.0338017
		0.0042253	0.0335103	0.0042253	0.0211261		0.0823577	0.118304	0.0335103	0.0401393	0.0295765	0.0169009	0.0781655	0.0169009	0.0253512	0.133092	0.16478	0.101404	0.299982		0.409835
		0.0335103	0.0169009	0.0992913	0.0760529		0.880568	0.0335103	0.0335103	0.0739403	0.0528147	0.0697152	0.130979	0.141542	0.0335103	0.333783	0.14788	0.0845035	0.0507022		0.0992909
		0.0335103	0.0335103	0.031689	0.0335103		0.0190059	0.283083	0.0190134	0.111967	0.48166	0.0335103	0.0042253	0.202806	0.0063379	0.0633778	0.380258	0.116192	0.0760529		0.120417
		0.0697152	0.0335103	0.0335103	0.261957		0.183719	0.458422	0.0549274	0.0232386	0.0929534	0.0063379	0.0380269	0.13098	0.0380269	0.223931	0.0105631	0.0169009	0.137317		0.0887282
		0.0335103	0.439409	0.0274639	0.0633774		0.0335103	0.0654902	0.0084505	0.0335103	0.0866157	0.0929534	0.169005	0.061265	0.0335103	0.0591524	0.0380269	0.0654902	0.122529		0.0401393
		0.18168	0.0335103	0.0063379	0.105629		0.0105589	0.0633778	0.293645	0.221819	0.109854	0.0190134	0.0464771	0.179568	0.0802782	0.0274639	0.0042253	0.245057	0.143654		0.0760529
		0.0335103	0.64433	0.101404	0.0042253		0.0335103	0.103516	0.0232386	0.0335103	0.0169009	0.114079	0.194356	0.190131	0.0335103	0.211256	0.090841	0.0591524	0.0232386		0.0335103
		0.120417	0.0335103	0.0633778	0.042252		0.0190059	0.338008	0.0718279	0.0697152	0.0971787	0.0063379	0.196468	0.0676026	0.141542	0.0335103	0.0190134	0.061265	0.17323		0.0570397
		0.0335103	0.0335103	0.194356	0.0866157		0.0147823	0.0042253	0.0211261	0.0274639	0.042252	0.0169009	0.114079	0.0105631	0.0042253	0.0335103	0.595731	0.221819	0.101403		0.0380269
		0.0335103	0.0295765	0.0739403	0.0084505		0.487801	0.0335103	0.0274639	0.0232386	0.120417	0.0335103	0.141542	0.160555	0.0528147	0.103516	0.0591524	0.0105631	0.0697152		0.0232386
		0.0232386	0.0570397	0.0295765	0.0126757		0.0886926	0.139429	0.0042253	0.492223	0.0063379	0.137317	0.090841	0.101404	0.0295765	0.0929534	0.160555	0.0845035	0.0126757		0.111967
		0.095066	0.236606	0.0335103	0.0105631		0.0316762	0.0042253	0.0295765	0.183793	0.0274639	0.105629	0.215481	0.0105631	0.0253512	0.213369	0.166893	0.338008	0.25562		0.190131
		0.0335103	0.0232386	0.0443645	0.0464771		0.0295647	0.0335103	0.0335103	0.0823906	0.0295765	0.0063379	0.0359142	0.0781655	0.0443645	0.109854	0.143654	0.0929534	0.0335103		0.0190134
		0.0042253	0.0335103	0.0823906	0.0063379		0.0168942	0.640101	0.0654902	0.0760529	0.0485894	0.0042253	0.0591524	0.0401393	0.0335103	0.0147883	0.0464771	0.0042253	0.209143		0.162668
		0.0335103	0.031689	0.0866157	0.0338017		0.0042236	0.0929534	0.0591524	0.242945	0.0335103	0.0105631	0.0781655	0.0823906	0.289419	0.0232386	0.0802782	0.061265	0.270407		0.0507022
		0.0105631	0.0335103	0.0295765	0.790091		0.183719	0.0887282	0.0147883	0.0105631	0.042252	0.0042253	0.0190134	0.0992913	0.0380269	0.0591524	0.0335103	0.0042253	0.0335103		0.0105631
		0.0042253	0.0190134	0.0335103	0.0169009		0.0335103	0.26407	0.0147883	0.0190134	0.143654	0.0335103	0.0211261	0.0335103	0.0929534	0.154217	0.217594	0.0781655	0.29787		0.0169009
		0.0335103	0.0063379	0.0335103	0.257732		0.0274529	0.118304	0.0063379	0.312658	0.061265	0.0211261	0.0211261	0.143654	0.177455	0.090841	0.16478	0.0887282	0.0253512		0.122529
		0.0570397	0.0084505	0.0063379	0.114079		0.183719	0.278858	0.0063379	0.0063379	0.0401393	0.0633778	0.169005	0.0570401	0.0042253	0.0464771	0.0042253	0.709818	0.340121		0.145767
		0.0335103	0.114079	0.0335103	0.0760529		0.0549053	0.0676026	0.0042253	0.196469	0.0781655	0.0190134	0.061265	0.887271	0.0335103	0.105629	0.390821	0.207031	0.0485894		0.0126757
		0.407722	0.162668	0.0335103	0.0042253		0.0591289	0.124642	0.0211261	0.095066	0.200693	0.0338017	0.183793	0.14788	0.179568	0.0443645	0.128867	0.209143	0.14788		0.118304
		0.0443645	0.0359142	0.0335103	0.0063379		0.130927	0.0549274	0.090841	0.0042253	0.0063379	0.0211261	0.0126757	0.380258	0.0380269	0.0042253	0.310545	0.0084505	0.103516		0.420397
		0.101404	0.0274639	0.204918	0.0147883		0.352654	0.0338017	0.0126757	0.160555	0.0042253	0.0633778	0.0887282	0.118304	0.0633774	0.185906	0.0126757	0.14788	0.090841		0.120417
		0.0335103	0.0042253	0.0335103	0.378147		0.0042236	0.26407	0.0633774	0.141542	0.0335103	0.0253514	0.0338017	0.283083	0.0528147	0.0211261	0.126754	0.0992913	0.0338017		0.166893
		0.0335103	0.0105631	0.0335103	0.0063379		0.0380116	0.0845035	0.0528147	0.0823906	0.154217	0.105629	0.177455	0.0380269	0.0105631	0.0570401	0.238719	0.118304	0.291532		0.0866157
		0.0335103	0.0335103	0.0042253	0.149993		0.0084472	0.0126757	0.0359142	0.145767	0.0866157	0.0802782	0.0295765	0.0359142	0.0718279	0.143654	0.128867	0.0654902	0.031689		0.0464771
		0.0335103	0.0335103	0.0654902	0.25562		0.0335103	0.166893	0.0338017	0.0570401	0.0253512	0.0211261	0.0274639	0.139429	0.0084505	0.0335103	0.109854	0.0338017	0.310545		0.0274639
		0.217594	0.0443645	0.0042253	0.0401393		0.0084472	0.0697152	0.0549274	0.0335103	0.042252	0.042252	0.0549274	0.031689	0.0126757	0.0253514	0.291532	0.293645	0.0549274		0.0570397
		0.0335103	0.0042253	0.0042253	0.0084505		0.0105589	0.0335103	0.198581	0.0823906	0.223931	0.0464771	0.0676026	0.0232386	0.0528147	0.570385	0.0887282	0.0739403	0.312658		0.0084505
		0.0335103	0.0781655	0.0335103	0.0105631		0.0042236	0.0718279	0.274632	0.0739403	0.395046	0.152105	0.0211261	0.111967	0.0295765	0.348571	0.25562	0.0335103	0.0335103		0.0380269
		0.0380269	0.0063379	0.0042253	0.0042253		0.12248	0.0211261	0.0042253	0.0591524	0.0147883	0.0084505	0.0169009	0.24717	0.0169009	0.25562	0.124642	0.031689	0.090841		0.090841
		0.0654902	0.0335103	0.0335103	0.0063379		0.0042236	0.0359142	0.0042253	0.0042253	0.135205	0.0105631	0.0549274	0.128867	0.0781655	0.0676026	0.34857	0.192244	0.0485894		0.0253512
		0.042252	0.794314	0.0335103	0.0042253		0.0168942	0.0274639	0.185906	0.0295765	0.143654	0.0295765	0.0443645	0.0105631	0.0126757	0.0190134	0.0633774	0.452085	0.0697152		0.0781655
		0.141542	0.126754	0.0042253	0.0335103		0.0485701	0.0335103	0.0335103	0.0401393	0.0126757	0.0549274	0.109854	0.031689	0.0781655	0.0042253	0.18168	0.124642	0.53448		0.0443645
		0.0359142	0.240832	0.0147883	0.0169009		0.0042236	0.0105631	0.0084505	0.0063379	0.111967	0.042252	0.202806	0.268294	0.0866157	0.0633778	0.0528147	0.0042253	0.124642		0.0760529
		0.0335103	0.0211261	0.0335103	0.0042253		0.0358998	0.0718279	0.0507022	0.114079	0.0633774	0.0295765	0.0549274	0.813315	0.190131	0.031689	0.135205	0.139429	0.031689		0.0654902
		0.230269	0.0042253	0.0169009	0.0335103		0.0335103	0.223931	0.120417	0.0335103	0.0338017	0.0992913	0.0335103	0.289421	0.0335103	0.0169009	0.0105631	0.061265	0.200693		0.090841
		0.0335103	0.0126757	0.0335103	0.0042253		0.445569	0.0781655	0.0992909	0.0063379	0.0549274	0.139429	0.0105631	0.0084505	0.0866157	0.0697152	0.0169009	0.0781655	0.0338017		0.0929534
		0.0042253	0.0359142	0.0335103	0.0335103		0.133038	0.0359142	0.0084505	0.18168	0.139429	0.215481	0.090841	0.0042253	0.0147883	0.0253514	0.433071	0.204918	0.0042253		0.196468
		0.0335103	0.466872	0.0063379	0.0042253		0.0675757	0.0253514	0.0211261	0.0633778	0.0335103	0.0211261	0.942197	0.304208	0.0295765	0.0105631	0.502785	0.0042253	0.202806		0.0549274
		0.0063379	0.0211261	0.0105631	0.0295765		0.0295647	0.0697152	0.101403	0.0802782	0.318996	0.0169009	0.0335103	0.120417	0.0042253	0.321108	0.0147883	0.217594	0.0866157		0.0147883
		0.0042253	0.0335103	0.0169009	0.0105631		0.0232294	0.276745	0.0063379	0.0380269	0.0591524	0.0232386	0.0971787	0.452085	0.162668	0.145767	0.0676026	0.122529	0.0633774		0.0105631
		0.042252	0.0335103	0.0042253	0.135205		0.114033	0.18168	0.0147883	0.0295765	0.0042253	0.105629	0.152105	0.0084505	0.16478	0.456309	0.0105631	0.445748	0.0570397		0.154217
		0.0335103	0.0380269	0.18168	0.0992909		0.12248	0.585179	0.0169009	0.0335103	0.0591524	0.0380269	0.0359142	0.0335103	0.0380269	0.0063379	0.160555	0.219707	0.249282		0.0126757
		0.0507022	0.0570397	0.0335103	0.0169009		0.0335103	0.0147883	0.0676026	0.0866157	0.15633	0.0063379	0.0971787	0.179568	0.0528147	0.0274639	0.084503	0.0253514	0.152105		0.0063379
		0.0335103	0.0718279	0.0063379	0.154217		0.128815	0.0147883	0.0295765	0.0845035	0.0781655	0.0485898	0.0063379	0.149993	0.109854	0.0971787	0.158443	0.107741	0.0042253		0.0823906
		0.0335103	0.0335103	0.0335103	0.0335103		0.0042236	0.207031	0.0443645	0.0126757	0.0335103	0.0380269	0.0338017	0.0697152	0.0464771	0.0335103	0.135205	0.0845035	0.0335103		0.0570397
		0.0401393	0.0190134	0.0335103	0.0295765		0.141485	0.0335103	0.0335103	0.295758	0.190131	0.274632	0.14788	0.0335103	0.576728	0.0084505	0.105629	0.0335103	0.0335103		0.133092
		0.0335103	0.0084505	0.0063379	0.0274639		0.204836	0.310545	0.0380269	0.0464771	0.090841	0.0105631	0.0335103	0.0401393	0.103516	0.0845035	0.118304	0.122529	0.116192		0.0570397
		0.0042253	0.0335103	0.0335103	0.0063379		0.0865812	0.0359142	0.0485894	0.095066	0.124642	0.0335103	0.103516	0.0781655	0.0295765	0.0042253	0.152105	0.0654902	0.223931		0.0211261
		0.0335103	1.25907	0.0338017	0.0887282		0.0042236	0.240832	0.0063379	0.0760529	0.0887282	0.0190134	0.0464771	0.095066	0.0992909	0.145767	0.0739403	0.0295765	0.0401393		0.0633774
		0.0335103	0.0335103	0.109854	0.0063379		0.0443466	0.13098	0.0401393	0.0335103	0.122529	0.0253514	0.0042253	0.0654902	0.0549274	0.0147883	0.111967	0.090841	0.283083		0.397159
		0.0042253	0.0335103	0.162668	0.0063379		0.0380116	0.188018	0.0147883	0.321108	0.312658	0.0084505	0.158443	0.0169009	0.0528147	0.0190134	0.33167	0.139429	0.0335103		0.0485894
		0.0063379	0.0335103	0.0042253	0.0335103		0.0190059	0.0739403	0.207031	0.0845035	0.135205	0.245057	0.0147883	0.169005	0.0359142	0.190131	0.124642	0.116192	0.0105631		0.0781655
		0.122529	0.0335103	0.0380269	0.0295765		0.133038	0.0042253	0.0971787	0.0335103	0.15633	0.171118	0.042252	0.0739403	0.0992909	0.154217	0.718259	0.0633778	0.0335103		0.266182
		0.095066	0.109854	0.0169009	0.352795		0.0063354	0.209143	0.0485894	0.0335103	0.0887282	0.0401393	0.0190134	0.0084505	0.0105631	0.169005	0.154217	0.169005	0.0084505		0.114079
		0.105629	0.0253512	0.0253514	0.0042253		0.0105589	0.101404	0.0570397	0.0338017	0.264069	0.0105631	0.18168	0.0929534	0.109854	0.0591524	0.0335103	0.0253514	0.0338017		0.0211261
			0.0190134	0.0211261	0.0063379		0.0042236	0.061265	0.0335103	0.456309	0.0823906	0.103516	0.202806	0.0169009	0.0971787	0.15633	0.0401393	0.0845035	0.682358		0.111967
			0.183793	0.0654902	0.0335103		0.149932	0.0401393	0.0697152	0.0042253	0.190131	0.213369	0.120417	0.764742	0.135205	0.14788	0.137317	0.312658	0.0253512		0.287308
			0.0654902	0.0335103	0.0335103		0.0063354	0.0335103	0.0971787	0.135205	0.130979	0.0253514	0.0335103	0.0633778	0.109854	0.0105631	0.0485894	0.384484	0.519686		0.031689
			0.344345	0.0190134	0.0169009		0.0211176	0.109854	0.0781655	0.245057	0.253506	0.090841	0.0105631	0.234494	0.0190134	0.0443645	0.276744	0.261957	0.219706		0.215481
			0.0335103	0.0335103	0.0042253		0.0063354	0.120417	0.042252	0.0335103	0.0929534	0.0507022	0.095066	0.15633	0.0718279	0.0591524	0.0335103	0.17323	0.031689		0.171118
			0.0042253	0.0274639	0.0042253		0.0253411	0.0335103	0.0063379	0.152105	0.513347	0.295758	0.0335103	0.152105	0.0126757	0.0802782	0.0126757	0.0253514	0.0335103		0.426734
			0.0335103	0.0042253	0.0443645		0.12248	0.0335103	0.0718279	0.0253514	0.0169009	0.293645	0.0654902	0.283083	0.0929534	0.0676026	0.0760529	0.0335103	0.234494		0.0781655
			0.0335103	0.454197	0.124642		0.0335103	0.0929534	0.109854	0.335896	0.0274639	0.0591524	0.0760529	0.0549274	0.0274639	0.143654	0.363359	0.158443	0.380258		0.105629
			0.0335103	0.0335103	0.0063379		0.0253411	0.109854	0.0971787	0.188018	0.15633	0.0549274	0.114079	0.0718279	0.217594	0.0591524	0.0169009	0.0232386	0.289419		0.17323
			0.0335103	0.0335103	0.0042253		0.0570172	0.749956	0.141542	0.107741	0.0338017	0.0697152	0.14788	0.0274639	0.418284	0.095066	0.0887282	0.0570401	0.116192		0.213368
			0.0335103	0.0335103	0.0232386		0.342096	0.207031	0.0570397	0.0211261	0.283083	0.312658	0.0126757	0.0781655	0.101403	0.0633778	0.0295765	0.0084505	0.207031		0.031689
			0.0126757	0.061265	0.0654902		0.0063354	0.0335103	0.0654902	0.23872	0.0338017	0.0063379	0.0084505	0.0528147	0.226044	0.139429	0.0063379	0.139429	0.549265		0.105629
			0.177455	0.0042253	0.0147883		0.0612406	0.0760529	0.0401393	0.0549274	0.0042253	0.031689	0.0464771	0.0335103	0.196468	0.0063379	0.198581	0.166893	0.0528147		0.0274639
			0.0570397	0.0063379	0.0380269		0.0358998	0.16478	0.0042253	0.0042253	0.0335103	0.0676026	0.0042253	0.0232386	0.145767	0.0042253	0.154217	0.553492	0.673903		0.0169009
			0.0042253	0.0042253	0.24717		0.0380116	0.204918	0.0169009	0.0335103	0.105629	0.0042253	0.350683	0.0105631	0.126754	0.278858	0.392934	0.0697152	0.276744		0.0253512
			0.0528147	0.0335103	0.439409		0.0084472	0.0274639	0.0654902	0.0676026	0.0274639	0.0063379	0.0335103	0.0335103	0.0042253	0.133092	0.0401393	0.458422	0.0443645		0.0992909
			0.0063379	0.0335103	0.0591524		0.0675757	0.0335103	0.0335103	0.0190134	0.0781655	0.0147883	0.061265	0.139429	0.0676026	0.234494	0.0335103	0.354909	0.0823906		0.0232386
			0.0126757	0.0335103	0.031689		0.0316762	0.0042253	0.0169009	0.0802782	0.0866157	0.0781655	0.0549274	0.0485898	0.0887282	0.111967	0.456309	0.105629	0.133092		0.221819
			0.0380269	0.0084505	0.0232386		0.177384	0.0335103	0.232381	0.0147883	0.361245	0.0802782	0.0253512	0.0823906	0.130979	0.0274639	0.15633	0.0760529	0.101403		0.0253512
			0.0211261	0.0042253	0.0335103		0.0380116	0.0126757	0.0464771	0.0169009	0.090841	0.042252	0.0380269	0.133092	0.0401393	0.0169009	0.090841	0.14788	0.109854		0.183793
			0.0335103	0.0335103	0.0042253		0.0527936	0.0063379	0.185906	0.13098	0.166893	0.128867	0.0253512	0.399271	0.0380269	0.0570401	0.204918	0.0169009	0.0338017		0.371808
			0.135205	0.365471	0.0338017		0.0591289	0.0335103	0.090841	0.042252	0.228156	0.0591524	0.0126757	0.0359142	0.0211261	0.0338017	0.236606	0.283083	0.0464771		0.0549274
			0.0274639	0.0211261	0.0335103		0.0126707	0.0676026	0.0126757	0.0887282	0.373922	0.0253514	0.0443645	0.215481	0.0971787	0.166893	0.126754	0.0335103	0.0549274		0.0697152
			0.0335103	0.0971787	0.0126757		0.0190059	0.0335103	0.0084505	0.0126757	0.090841	0.0253514	0.0126757	0.0338017	0.0063379	0.0802782	0.310545	0.0335103	0.145767		0.502785
			0.0359142	0.101404	0.0084505		0.0358998	0.0335103	0.0335103	0.234494	0.0823906	0.0570401	0.18168	0.0335103	0.352795	0.14788	0.253506	0.0335103	0.061265		0.363359
			0.0169009	0.0084505	0.095066		0.147821	0.0335103	0.0335103	0.0335103	0.245057	0.090841	0.0359142	0.0084505	0.0866157	0.0253514	0.198581	0.380258	0.101403		0.0464771
			0.061265	0.0105631	0.0295765		0.310421	0.0739403	0.0042253	0.0549274	0.249282	0.0401393	0.0232386	0.0335103	0.230269	0.061265	0.0359142	0.0845035	0.145767		0.0335103
			0.0084505	0.116192	0.120417		0.0063354	0.0274639	0.0147883	0.118304	0.0084505	0.0147883	0.0507022	0.128867	0.158443	0.0443645	0.230269	0.0507022	0.0063379		0.390821
			1.40694	0.0335103	0.0335103		0.0654639	0.103516	0.031689	0.604193	0.0253512	0.114079	0.0507022	0.0232386	0.0042253	0.291533	0.0718279	0.0802782	0.109854		0.0802782
			0.0335103	0.0232386	0.0105631		0.10981	0.0147883	0.0549274	0.0781655	0.166893	0.0042253	0.0335103	0.0335103	0.042252	0.0866157	0.0443645	0.0443645	0.0823906		0.061265
			0.0335103	0.0335103	0.0507022		0.0190059	0.0211261	0.0295765	0.217594	0.0718279	0.118304	0.0211261	0.0295765	0.042252	0.154217	0.190131	0.095066	0.209143		0.204918
			0.0335103	0.0274639	0.0335103		0.287192	0.0190134	0.0084505	0.101404	0.14788	0.654886	0.0485894	0.126754	0.111967	0.0591524	0.395046	0.340121	0.0992909		0.0443645
			0.0042253	0.213369	0.0335103		0.0527936	0.0507022	0.0464771	0.0359142	0.240832	0.0485898	0.0253512	0.0359142	0.0485894	0.0549274	0.637984	0.0335103	0.0781655		0.0147883
			0.0654902	0.0507022	0.0063379		0.0126707	0.0232386	0.0929534	0.0549274	0.223931	0.192244	0.0147883	0.0443645	0.0823906	0.0190134	0.0126757	0.0147883	0.116192		0.101403
			0.0063379	0.107741	0.0105631		0.164714	0.196469	0.107741	0.0335103	0.17323	0.160555	0.042252	0.0718279	0.287308	0.749956	0.40561	0.0042253	0.0485894		0.198581
			0.289419	0.443635	0.0147883		0.128815	0.0190134	0.149993	0.0380269	0.137317	0.0507022	0.135205	0.346458	0.0190134	0.0335103	0.126754	0.0169009	0.101403		0.0211261
			0.0335103	0.0105631	0.0042253		0.0781341	0.0507022	0.0211261	0.171118	0.177455	0.13098	0.0335103	0.090841	0.0042253	0.0633778	0.169005	0.48166	0.0147883		0.0335103
			0.0126757	0.0335103	0.0335103		0.10981	0.253507	0.41406	0.0633778	0.145767	0.0105631	0.190131	0.276745	0.095066	0.388709	0.0697152	0.042252	0.128867		0.0335103
			0.0335103	0.0042253	0.0126757		0.126703	0.179568	0.0063379	0.0992913	0.333783	0.107741	0.0295765	0.0335103	0.139429	0.0781655	0.217594	0.116192	0.0823906		0.031689
			0.0335103	0.061265	0.0126757		0.901683	0.0335103	0.0485894	0.0335103	0.211256	0.095066	0.116192	0.0718279	0.0335103	0.101404	0.378147	0.101404	0.344345		0.0739403
			0.0042253	0.0335103	0.428847		0.0042236	0.0084505	0.128867	0.0676026	0.126754	0.0084505	0.0676026	0.585179	0.0253512	0.16478	0.185906	0.14788	0.0274639		0.223931
			0.158443	0.0781655	0.0718279		0.287192	0.0549274	0.0528147	0.0335103	0.0232386	0.185906	0.0887282	0.346458	0.0232386	0.0084505	0.0211261	0.0697152	0.0359142		0.0549274
			0.0253512	0.0697152	0.0335103		0.133038	0.0335103	0.0211261	0.0335103	0.0992909	0.0823906	0.0084505	0.234494	0.17323	0.0335103	0.0528147	0.0464771	0.118304		0.0654902
			0.401384	0.0591524	0.031689		0.130927	0.0169009	0.0295765	0.0335103	0.154217	0.211256	0.0992909	0.122529	0.0335103	0.0823906	0.278857	0.0084505	0.103516		0.190131
			0.221819	0.0042253	0.0866157		0.0760225	0.0401393	0.0126757	0.0335103	0.0887282	0.116192	0.0232386	0.0232386	0.0063379	0.0507022	0.169005	0.183793	0.16478		0.0359142
			0.0335103	0.0676026	0.0971787		0.0274529	0.0253514	0.0063379	0.574603	0.0126757	0.192244	0.0295765	0.0084505	0.0190134	0.449973	0.084503	0.166893	0.378147		0.868253
			0.0169009	0.0335103	0.0063379		0.0675757	0.0549274	0.0654902	0.382371	0.0507022	0.114079	0.0971787	0.031689	0.14788	0.591512	0.221819	0.196469	0.0335103		0.202806
			0.242944	0.13098	0.0335103		0.0253411	0.0295765	0.090841	0.0887282	0.0760529	0.418285	0.0232386	0.0126757	0.103516	0.118304	0.32322	0.0335103	0.0335103		0.175343
			0.18168	0.0335103	0.0042253		0.0335103	0.114079	0.0335103	0.0718279	0.0570397	0.0084505	0.0739403	0.232381	0.105629	0.0338017	0.0887282	0.0992913	0.0802782		0.114079
			0.295757	0.0359142	0.350683		0.0190059	0.0105631	0.0718279	0.0887282	0.0084505	0.0105631	0.0760529	0.0084505	0.249282	0.0739403	0.0971787	0.0866157	0.160555		0.0380269
			0.0063379	0.0845035	0.0232386		0.0105589	0.0274639	0.0335103	0.0232386	0.0866157	0.0232386	0.0335103	0.120417	0.154217	0.0105631	0.101403	0.367584	0.141542		0.0401393
			0.0042253	0.0335103	0.0697152		0.0274529	0.0760529	0.0253512	0.124642	0.152105	0.0549274	0.042252	0.0169009	0.042252	0.0866157	0.0718279	0.171118	0.0549274		0.0992909
			0.0335103	0.0084505	0.0063379		0.278745	0.0105631	0.188018	0.152105	0.0063379	0.0335103	0.116192	0.0335103	0.116192	0.268294	0.114079	0.109854	0.101403		0.126754
			0.0335103	0.0335103	0.0190134		0.0063354	0.378147	0.0929534	0.118304	0.118304	0.0739403	0.0338017	0.0443645	0.0232386	0.0528147	0.118304	0.107741	0.0464771		0.0359142
			0.0335103	0.0335103	0.280969		0.0760225	0.0211261	0.0443645	0.0335103	0.105629	0.107741	0.0211261	0.0335103	0.0507022	0.116192	0.124642	0.177455	0.084503		0.0380269
			0.0335103	0.103516	0.0190134		0.0358998	0.0992913	0.0253512	0.0084505	0.0549274	0.0528147	0.0253512	0.0042253	0.0042253	0.0295765	0.0126757	0.061265	0.0654902		0.0654902
			0.502785	0.0335103	0.0335103		0.0316762	0.0253514	0.0042253	0.154217	0.0169009	0.0866157	0.118304	0.0781655	0.0335103	0.631643	0.0802782	0.0887282	0.0169009		0.128867
			0.0335103	0.0042253	0.107741		0.185831	0.0676026	0.042252	0.314771	0.0507022	0.0063379	0.190131	0.0042253	0.0042253	0.137317	0.133092	0.0335103	0.207031		0.0042253
			0.0147883	0.0528147	0.0063379		0.158379	0.0739403	0.0063379	0.0507022	0.0147883	0.0042253	0.0507022	0.0335103	0.0335103	0.722495	0.101403	0.528135	0.126754		0.0591524
			0.0335103	0.0335103	0.145767		0.164714	0.80699	0.0335103	0.0507022	0.0485894	0.0338017	0.0485894	0.0866157	0.0338017	0.0335103	0.0718279	0.116192	0.302095		0.0507022
			0.0335103	0.0335103	0.0464771		0.206948	0.0335103	0.0063379	0.137317	0.133092	0.0359142	0.122529	0.0359142	0.061265	0.0591524	0.120417	0.185906	0.261957		0.0147883
			0.177455	0.0570401	0.095066		0.411782	0.0739403	0.211256	0.196469	0.130979	0.13098	0.183793	0.0335103	0.0338017	0.0335103	0.0335103	0.211256	0.0042253		0.0718279
			0.130979	0.240832	0.0359142		0.0190059	0.0335103	0.0359142	0.0232386	0.0549274	0.0063379	0.118304	0.0084505	0.109854	0.0654902	0.042252	0.528135	0.295757		0.031689
			0.0335103	0.0335103	0.0274639		0.0591289	0.0464771	0.0295765	0.0802782	0.141542	0.0335103	0.0739403	0.166893	0.0528147	0.101404	0.0866157	0.177455	0.162668		0.141542
			0.0126757		0.0063379		0.0042236	0.042252	0.0211261	0.0485898	0.0359142	0.0063379	0.0739403	0.0232386	0.14788	0.0211261	0.154217	0.673903	0.0190134		0.0147883
			0.0422517		0.378147		0.0274529	0.0929534	0.0042253	0.107741	0.111967	0.0591524	0.0253512	0.160555	0.0042253	0.0718279	0.219706	0.293645	0.0401393		0.0335103
			0.0338017		0.084503		0.0063354	0.0802782	0.399271	0.0485898	0.0718279	0.0084505	0.0335103	0.0887282	0.0042253	0.0295765	0.0169009	0.0338017	0.0335103		0.278857
			0.0147883		0.0443645		0.0654639	0.0485898	0.0464771	0.0253514	0.0401393	0.0335103	0.346458	0.0401393	0.0528147	0.0823906	0.114079	0.24717	0.223931		0.0147883
			0.103516		0.270407		0.0147823	0.0992913	0.084503	0.0338017	0.090841	0.0274639	0.061265	0.536585	0.107741	0.145767	0.0992909	0.0570401	0.0633774		0.0105631
			0.0401393		0.0866157		0.0401232	0.116192	0.0380269	0.0971787	0.0887282	0.0105631	0.0992909	0.135205	0.0697152	0.0042253	0.0929534	0.137317	0.204918		0.130979
			0.0335103		0.401384		0.0063354	0.0042253	0.116192	0.0147883	0.293645	0.0335103	0.0676026	0.0802782	0.0211261	0.0992913	0.0380269	0.0274639	0.190131		0.0335103
			1.08796		0.0781655		0.168937	0.192244	0.177455	0.118304	0.749956	0.0739403	0.120417	0.0802782	0.145767	0.109854	0.0887282	0.232381	0.177455		0.0042253
			0.0335103		0.0464771		0.0190059	0.0887282	0.0335103	0.0971787	0.0190134	0.0335103	0.0274639	0.215481	0.0253512	0.234494	0.084503	0.031689	0.109854		0.198581
			0.0126757		0.0190134		0.0084472	0.111967	0.0335103	0.109854	0.133092	0.0335103	0.0992909	0.0335103	0.0335103	0.0507022	0.0443645	0.0845035	0.0063379		0.0335103
			0.0335103		0.0335103		0.0570172	0.0507022	0.090841	0.0232386	0.0485894	0.0335103	0.0528147	0.0464771	0.0338017	0.318996	0.0464771	0.141542	0.0633774		0.0084505
			0.270407		0.0126757		0.0443466	0.23872	0.219706	0.114079	0.0633774	0.0464771	0.0676026	0.105629	0.177455	0.0507022	0.0781655	0.0335103	0.270407		0.095066
			0.031689		0.0063379		0.0335103	0.0169009	0.228156	0.0042253	0.118304	0.0335103	0.0464771	0.0443645	0.0929534	0.0169009	0.0063379	0.0676026	0.0866157		0.0274639
			0.0335103		0.0042253		0.0335103	0.0781655	0.0335103	0.128867	0.18168	0.0335103	0.196468	0.0676026	0.0507022	0.0633778	0.0063379	0.245057	0.0232386		0.0335103
			0.111967		0.0084505		0.20906	0.031689	0.0084505	0.0507022	0.169005	0.0464771	0.0126757	0.0697152	0.179568	0.0443645	0.335896	0.0971787	0.0338017		0.0105631
			0.0335103		0.0105631		0.0485701	0.0718279	0.122529	0.103516	0.135205	0.0335103	0.0718279	0.211256	0.33167	0.0335103	0.0739403	0.14788	0.145767		0.0697152
			0.0335103		0.817557		0.0042236	0.0211261	0.0971787	0.0084505	0.0507022	0.0335103	0.0042253	0.253507	0.0253512	0.042252	0.762621	0.0697152	0.0570397		0.101403
			0.0570397		0.0295765		0.0084472	0.0190134	0.042252	0.0359142	0.0823906	0.266182	0.179568	0.126754	0.0591524	0.276745	0.0676026	0.0063379	0.0105631		0.128867
			0.0335103		0.0739403		0.0063354	0.0676026	0.31477	0.111967	0.0739403	0.0295765	0.109854	0.0084505	0.0042253	0.0464771	0.213368	0.0570401	0.0401393		0.276744
			0.0042253		0.0335103		0.0485701	0.0084505	0.0760529	0.0042253	0.0042253	0.0359142	0.0253512	0.0992913	0.0739403	0.0739403	0.0335103	0.236606	0.0232386		0.175343
			0.0335103		0.107741		0.171049	0.0126757	0.0063379	0.363359	0.183793	0.0042253	0.0570397	0.329558	0.0169009	0.061265	0.0802782	0.111967	0.0335103		0.122529
			0.221819		0.0253512		0.0886926	0.0485898	0.0295765	0.690807	0.0190134	0.105629	0.285195	0.0697152	0.0211261	0.128867	0.0335103	0.0549274	0.0464771		0.192243
			0.0335103		0.0335103		0.0084472	0.0232386	0.0147883	0.26407	0.0929534	0.0760529	0.198581	0.0802782	0.0335103	0.0335103	0.0591524	0.209143	0.0802782		0.0232386
			0.0335103		0.0335103		0.124592	0.114079	0.0042253	0.0274639	0.365471	0.0295765	0.198581	0.0633778	0.0335103	0.23872	0.128867	0.0485898	0.213368		0.456309
			0.0190134		0.0063379		0.0335103	0.090841	0.0105631	0.0697152	0.264069	0.0253514	0.0823906	0.0147883	0.0380269	0.0591524	0.211256	0.0063379	0.0633774		0.105629
			0.0253512		0.0042253		0.0042236	0.0335103	0.198581	0.122529	0.061265	0.0126757	0.228156	0.0359142	0.0126757	0.0084505	0.0528147	0.101404	0.257732		0.162668
			0.0335103		0.29787		0.0211176	0.149993	0.0887282	0.111967	0.116192	0.0335103	0.0169009	0.0401393	0.162668	0.0042253	0.253506	0.0485898	0.0169009		0.090841
			0.0042253		0.124642		0.145709	0.0042253	0.0507022	0.107741	0.399271	0.0063379	0.0253512	0.0042253	0.207031	0.0063379	0.0591524	0.60207	0.0485894		0.0335103
			0.648542		0.0105631		0.0886926	0.160555	0.0253512	0.183793	0.0190134	0.0232386	0.084503	0.0126757	0.0190134	0.0295765	0.257732	0.185906	1.00557		0.230269
			0.0335103		0.0063379		0.0126707	0.0929534	0.0549274	0.0401393	0.0528147	0.0042253	0.179568	0.0335103	0.0549274	0.249282	0.0401393	0.0335103	0.0929534		0.0992909
			0.0042253		0.0274639		0.276633	0.116192	0.0802782	0.0105631	0.0295765	0.0335103	0.0042253	0.0335103	0.0274639	0.0147883	0.720375	0.29787	0.183793		0.295757
			0.0335103		0.0063379		0.0274529	0.0335103	0.0295765	0.0335103	0.0126757	0.061265	0.0591524	0.0335103	0.215481	0.160555	0.152105	0.122529	0.149993		0.154217
			0.0335103		0.33167		0.0084472	0.0335103	0.0063379	0.0802782	0.177455	0.061265	0.0042253	0.0169009	0.223931	0.787985	0.118304	0.0211261	0.0359142		0.223931
			0.0147883		0.175343		0.033788	0.0464771	0.105629	0.0274639	0.135205	0.0105631	0.061265	0.0335103	0.0105631	0.090841	0.109854	0.0507022	0.0211261		0.0464771
			0.420397		0.0105631		0.0211176	0.0335103	0.342233	0.0105631	0.0380269	0.0845035	0.0697152	0.0335103	0.0335103	0.266182	0.16478	0.061265	0.0549274		0.426734
			0.24717		0.0147883		0.0190059	0.0507022	0.0528147	0.0570401	0.0042253	0.061265	0.0169009	0.0335103	0.0274639	0.253507	0.302095	0.0591524	0.120417		0.124642
			0.0380269		0.162668		0.0063354	0.0126757	0.0042253	0.0971787	0.204918	0.0295765	0.103516	0.0591524	0.0485894	0.0464771	0.223931	0.120417	0.0295765		0.0063379
			0.0802782		0.0105631		0.0570172	0.0042253	0.0105631	0.0232386	0.276744	0.042252	0.0633774	0.0633778	0.0169009	0.329558	0.114079	0.0042253	0.0507022		0.0485894
			0.0063379		0.0335103		0.24707	0.0042253	0.101403	0.226044	0.17323	0.0335103	0.141542	0.0380269	0.16478	0.0335103	0.0887282	0.0190134	0.0929534		0.29787
			0.107741		0.0126757		0.0335103	0.0823906	0.107741	0.0549274	0.245057	0.0549274	0.130979	0.0042253	0.397159	0.0190134	0.031689	0.0335103	0.0718279		0.0992909
			0.30632		0.0335103		0.0464584	0.0042253	0.0718279	0.0654902	0.111967	0.0335103	0.084503	0.103516	0.25562	0.0105631	0.354909	0.266182	0.0633774		0.0380269
			0.0063379		0.0335103		0.0274529	0.0591524	0.190131	0.0338017	0.274632	0.0380269	0.124642	0.158443	0.0190134	0.0335103	0.0335103	0.090841	0.0335103		0.253506
			0.0126757		0.589402		0.0105589	0.0676026	0.0063379	0.0338017	0.122529	0.0084505	0.382371	0.0718279	0.128867	0.0335103	0.0802782	0.175343	0.0823906		0.0971787
			0.0464771		0.0485894		0.033788	0.0464771	0.0549274	0.0992913	0.0971787	0.0190134	0.0971787	0.0507022	0.0718279	0.0042253	0.217594	0.0528147	0.0335103		0.259844
			0.0335103		0.0335103		0.0358998	0.158443	0.0335103	0.0232386	0.0335103	0.0335103	0.0929534	0.0063379	0.308433	0.0042253	0.0190134	0.420397	0.0380269		0.177455
			0.0295765		0.0760529		0.310421	0.0570401	0.084503	0.549265	0.18168	0.0147883	0.0380269	0.0232386	0.0380269	0.0042253	0.137317	0.299982	0.107741		0.0781655
			0.519686		0.0084505		0.105587	0.0464771	0.0042253	0.0485898	0.0443645	0.0359142	0.126754	0.0992913	0.158443	0.0042253	0.0401393	0.0295765	0.0485894		0.0739403
			0.0443645		0.0105631		0.0717991	0.137317	0.0042253	0.133092	0.0507022	0.0335103	0.217594	0.24717	0.14788	0.0335103	0.126754	0.0105631	0.0781655		0.084503
			0.0335103		0.0760529		0.0485701	0.0338017	0.0063379	0.133092	0.0697152	0.0253514	0.0084505	0.154217	0.031689	0.0042253	0.0676026	0.0105631	0.350683		0.202806
			0.0335103		0.0335103		0.202725	0.0084505	0.0401393	0.0253514	0.0359142	0.0335103	0.103516	0.190131	0.283083	0.0063379	0.0042253	0.162668	0.0823906		0.0232386
			0.0335103		0.0335103		0.0971394	0.103516	0.0591524	0.0063379	0.0654902	0.0676026	0.116192	0.0739403	0.211256	0.0507022	0.0654902	0.107741	0.0549274		0.259844
			0.0335103		0.0887282		0.0063354	0.18168	0.494335	0.162668	0.295757	0.118304	0.0295765	0.0591524	0.249282	0.0335103	0.042252	0.0335103	0.238719		0.435184
			0.137317		0.0042253		0.306198	0.042252	0.0633774	0.234494	0.0676026	0.160555	0.179568	0.0887282	0.107741	0.122529	0.0697152	0.0845035	0.29787		0.318996
			0.0335103		0.0063379		0.0335103	0.042252	0.0190134	0.042252	0.266182	0.120417	0.116192	0.466872	0.0718279	0.0697152	0.270407	0.0084505	0.0971787		0.0063379
			0.0042253		0.0169009		0.0886926	0.0169009	0.0105631	0.223931	0.111967	0.325333	0.139429	0.031689	0.264069	0.177455	0.325333	0.0718279	0.0274639		0.0718279
			0.0335103		0.149993		0.0380116	0.0464771	0.0042253	0.135205	0.0147883	0.0063379	0.659107	0.061265	0.494335	0.0401393	0.107741	0.0211261	0.0739403		0.114079
			0.0335103		0.0063379		0.0612406	0.0063379	0.0380269	0.149993	0.0739403	0.0147883	0.0380269	0.703468	0.0781655	0.0591524	0.101403	0.0042253	0.0971787		0.215481
			0.0335103		0.0042253		0.063352	0.0338017	0.0042253	0.0380269	0.261957	0.0084505	0.0274639	0.061265	0.0126757	0.0295765	0.116192	0.0042253	0.228156		0.145767
			0.344345		0.223931		0.0274529	0.0084505	0.061265	0.118304	0.0190134	0.0359142	0.031689	0.13098	0.0042253	0.095066	0.585179	0.302096	0.0335103		0.196468
			0.0335103		0.0359142		0.0042236	0.242945	0.0760529	0.0760529	0.130979	0.0147883	0.0335103	0.18168	0.0084505	0.0654902	0.0697152	0.0335103	0.0485894		0.361245
			0.0335103		0.0295765		0.0335103	0.0190134	0.0359142	0.0845035	0.0063379	0.0105631	0.207031	0.0718279	0.0335103	0.519686	0.0676026	0.530255	0.342233		0.0232386
			0.344345		0.084503		0.194278	0.542916	0.095066	0.0507022	0.128867	0.228156	0.223931	0.251394	0.107741	0.0464771	0.378147	0.0232386	0.095066		0.0295765
			0.141542		0.363359		0.0126707	0.0359142	0.350683	0.13098	0.154217	0.0105631	0.179568	0.0591524	0.0633774	0.217594	0.215481	0.042252	0.0335103		0.462647
			0.0335103		0.773185		0.0696873	0.18168	0.0105631	0.0211261	0.179568	0.0359142	0.200693	0.154217	0.0697152	0.0971787	0.0760529	0.0845035	0.0359142		0.357021
			0.0335103		0.0739403		0.0042236	0.276745	0.0105631	0.14788	0.152105	0.0274639	0.0335103	0.47321	0.143654	0.0633778	0.171118	0.0654902	0.133092		0.0654902
			0.0359142		0.0126757		0.0084472	0.0169009	0.084503	0.0676026	0.240832	0.0084505	0.0359142	0.0274639	0.32322	0.0570401	0.242944	0.17323	0.270407		0.253506
			0.0380269		0.0335103		0.0168942	0.228156	0.0084505	0.031689	0.0274639	0.128867	0.0697152	0.230269	0.16478	0.0654902	0.287308	0.152105	0.061265		0.0802782
			0.0335103		0.0335103		0.0042236	0.0845035	0.0739403	0.0549274	0.0190134	0.0591524	0.354909	0.0147883	0.0295765	0.0335103	0.0042253	0.0570401	0.0866157		0.0570397
			1.58226		0.109854		0.0823577	0.367584	0.0169009	0.0549274	0.0295765	0.0359142	0.0335103	0.0676026	0.0401393	0.188018	0.0190134	0.280971	0.116192		0.114079
			0.0335103		0.14788		0.0063354	0.0359142	0.0169009	0.299982	0.0697152	0.0084505	0.0887282	0.145767	0.177455	0.274632	0.283083	0.0823906	0.399271		0.0887282
			0.0335103		0.0335103		0.0739109	0.171118	0.0042253	0.0591524	0.0528147	0.185906	0.352795	0.0335103	0.198581	0.139429	0.0887282	0.0549274	0.042252		0.14788
			0.0126757		0.0126757		0.0335103	0.120417	0.122529	0.0232386	0.0443645	0.0845035	0.0676026	0.0105631	0.0697152	0.0866157	0.0654902	0.13098	0.0190134		0.0335103
			0.0063379		0.133092		0.0335103	0.149993	0.0232386	0.0781655	0.0338017	0.031689	0.228156	0.0274639	0.0335103	0.0654902	0.0042253	0.103516	0.29787		0.130979
			0.0105631		0.293645		0.0401232	0.109854	0.24717	0.0211261	0.0105631	0.042252	0.084503	0.0676026	0.042252	0.090841	0.215481	0.095066	0.283083		0.118304
			0.585179		0.585179		0.0295647	0.0063379	0.0126757	0.0147883	0.031689	0.0570401	0.0485894	0.0126757	0.0781655	0.0105631	0.0760529	0.118304	0.0654902		0.0781655
			0.0190134		0.0105631		0.0760225	0.0105631	0.0485894	0.0105631	0.133092	0.0295765	0.0380269	0.118304	0.0401393	0.0718279	0.0042253	0.0338017	0.190131		0.365471
			0.367584		0.031689		0.147821	0.0105631	0.061265	0.0335103	0.0169009	0.031689	0.0887282	0.0126757	0.0654902	0.126754	0.310545	0.162668	0.0633774		0.16478
			0.0401393		0.834459		0.130927	0.0802782	0.0169009	0.0697152	0.105629	0.0063379	0.0126757	0.0335103	0.0335103	0.0084505	0.0042253	0.27252	0.141542		0.116192
			0.0335103		0.0866157		0.0443466	0.15633	0.0063379	0.0697152	0.0380269	0.0760529	0.0147883	0.0169009	0.084503	0.135205	0.0443645	0.0335103	0.149993		0.0335103
			0.0042253		0.0507022		0.0105589	0.0443645	0.0380269	0.190131	0.061265	0.0335103	0.0042253	0.0232386	0.105629	0.0190134	0.114079	0.0335103	0.64433		0.137317
			0.295757		0.384484		0.0042236	0.196469	0.0338017	0.0169009	0.111967	0.0169009	0.409835	0.0335103	0.0739403	0.0042253	0.0274639	0.209143	0.0591524		0.061265
			0.965415		0.0147883		0.0335103	0.13098	0.090841	0.0335103	0.0126757	0.111967	0.15633	0.0697152	0.0042253	0.0887282	0.0380269	0.160555	0.295757		0.0380269
			0.0084505		0.15633		0.0316762	0.042252	0.202806	0.0211261	0.213368	0.0823906	0.0232386	0.0147883	0.213368	0.0063379	0.061265	0.0971787	0.0190134		0.0633774
			0.0335103		0.0084505		0.0126707	0.122529	0.0443645	0.0295765	0.0084505	0.0633778	0.0739403	0.0169009	0.190131	0.0528147	0.0718279	0.160555	0.0464771		0.171118
			0.0105631		0.0760529		0.0063354	0.0802782	0.0042253	0.0633778	0.0781655	0.0295765	0.031689	0.0063379	0.0697152	0.0591524	0.0169009	0.426734	0.145767		0.158443
			0.0549274		0.0971787		0.0612406	0.118304	0.0718279	0.0464771	0.0084505	0.0169009	0.111967	0.0570401	0.0359142	0.0401393	0.230269	0.236606	0.118304		0.133092
			0.0464771		0.0739403		0.0335103	0.17323	0.564056	0.0147883	0.0359142	0.0169009	0.177455	0.126754	0.428847	0.061265	0.0126757	0.0570401	0.388709		0.0232386
			0.0422517		0.0084505		0.185831	0.0739403	0.0485894	0.0063379	0.0781655	0.0401393	0.0169009	0.0697152	0.109854	0.0190134	0.0380269	0.223931	0.0295765		0.145767
			0.0169009		0.0485894		0.0908044	0.0633778	0.0380269	0.160555	0.160555	0.0929534	0.103516	0.0169009	0.135205	0.0105631	0.0105631	0.154217	0.640101		0.0401393
			0.0335103		0.0169009		0.0190059	0.0781655	0.0274639	0.0211261	0.0274639	0.0464771	0.0042253	0.0042253	0.302095	0.0253514	0.0042253	0.0802782	0.101403		0.105629
			0.0335103		0.139429		0.0063354	0.0169009	0.0042253	0.124642	0.0570397	0.109854	0.0359142	0.0063379	0.0063379	0.120417	0.200693	0.487998	0.48166		0.0633774
			0.0335103		0.0380269		0.249182	0.390821	0.135205	0.17323	0.179568	0.0274639	0.158443	0.0887282	0.169005	0.251394	0.107741	0.0335103	0.0335103		0.105629
			0.15633		0.196468		0.0232294	0.0335103	0.0359142	0.0084505	0.0591524	0.0335103	0.0335103	0.120417	0.0380269	0.17323	0.295757	0.291533	0.223931		0.101403
			0.0335103		0.152105		0.042235	0.0147883	0.0169009	0.0211261	0.0443645	0.095066	0.031689	0.111967	0.105629	0.0485898	0.101403	0.158443	0.0485894		0.454197
			0.0335103		0.232381		0.050682	0.0253514	0.0274639	0.0105631	0.188018	0.32322	0.0823906	0.0105631	0.0992909	0.114079	0.0063379	0.149993	0.289419		0.0042253
			0.154217		0.0335103		0.0335103	0.114079	0.0042253	0.0147883	0.33167	0.0335103	0.0654902	0.245057	0.0063379	0.0169009	0.0105631	0.031689	0.061265		0.209143
			0.0335103		0.0335103		0.0335103	0.0084505	0.17323	0.0190134	0.0084505	0.0126757	0.0697152	0.183793	0.0105631	0.188018	0.0676026	0.0042253	0.128867		0.061265
			0.276744		0.0549274		0.0063354	0.261957	0.0126757	0.111967	0.15633	0.0739403	0.0190134	0.0084505	0.141542	0.0401393	0.101403	0.101404	0.209143		0.200693
			0.0084505		0.0781655		0.0335103	0.0718279	0.251394	0.0802782	0.0676026	0.0105631	0.226044	0.0335103	0.0528147	0.0335103	0.0591524	0.135205	0.116192		0.0063379
			0.120417		0.0718279		0.278745	0.128867	0.0401393	0.0042253	0.0929534	0.0335103	0.0802782	0.0338017	0.158443	0.0802782	0.16478	0.0335103	0.190131		0.0528147
			0.420397		0.0718279		0.213283	0.0739403	0.0697152	0.0295765	0.0739403	0.0105631	0.0147883	0.0232386	0.0802782	0.0147883	0.392934	0.0633778	0.0507022		0.175343
			0.0335103		0.207031		0.0335103	0.0335103	0.0253512	0.0335103	0.0591524	0.0760529	0.0147883	0.0718279	0.0464771	0.0718279	0.0335103	0.152105	0.141542		0.0591524
			0.646443		0.0401393		0.0042236	0.0211261	0.0697152	0.171118	0.0063379	0.0464771	0.0338017	0.0232386	0.183793	0.0380269	0.0169009	0.24717	0.0866157		0.0633774
			0.0401393		0.0443645		0.0042236	0.0042253	0.031689	0.179568	0.0147883	0.0380269	0.0105631	0.177455	0.0253512	0.107741	0.0190134	0.139429	0.407721		0.0718279
			0.0401393		0.0335103		0.0105589	0.0126757	0.0971787	0.325333	0.061265	0.031689	0.0823906	0.0169009	0.0063379	0.0335103	0.452085	0.126754	0.162668		0.0570397
			0.0338017		0.316883		0.0042236	0.198581	0.0295765	0.0295765	0.0169009	0.0380269	0.0335103	0.0507022	0.207031	0.0042253	0.0633774	0.0760529	0.0042253		0.0335103
			0.0335103		0.0084505		0.0084472	0.152105	0.0866157	0.0335103	0.0295765	0.0042253	0.0971787	0.0211261	0.105629	0.0190134	0.118304	0.0211261	0.158443		0.24717
			0.0063379		0.158443		0.0063354	0.135205	0.0633774	0.0739403	0.0335103	0.0105631	0.0760529	0.0190134	0.0274639	0.124642	0.0676026	0.382371	0.0232386		0.152105
			0.0190134		0.0084505		0.149932	0.0570401	0.0063379	0.0591524	0.0549274	0.0253514	0.143654	0.0042253	0.635872	0.207031	0.143654	0.0380269	0.126754		0.103516
			0.0335103		0.287308		0.0823577	0.0845035	0.0335103	0.0335103	0.143654	0.0633778	0.0042253	0.0528147	0.234494	0.26407	0.32322	0.124642	0.0528147		0.302095
			0.0335103		0.111967		0.0147823	0.0253514	0.0042253	0.0105631	0.0105631	0.0845035	0.0253512	0.0042253	0.0591524	0.0211261	0.0464771	0.331671	0.0464771		0.105629
			0.0335103		0.0739403		0.0042236	0.0126757	0.0295765	0.107741	0.0992909	0.0042253	0.0697152	0.101404	0.232381	0.0507022	0.0274639	0.0591524	0.111967		0.0335103
			0.0335103		0.51546		0.0084472	0.0335103	0.0295765	0.0232386	0.0084505	0.145767	0.0359142	0.0654902	0.149993	0.280971	0.0654902	0.0063379	0.213368		0.0549274
[truncated: 2,180 more rows]
