# Supplementary material for: Heat Shock Factor 1 forms nuclear condensates and restructures the yeast genome before activating target genes
Source: eLife. 2024 Oct 15;12:RP92464. doi: 10.7554/eLife.92464 (PMC11479590; doi:10.7554/eLife.92464)
Supplement: Figure 3—figure supplement 1—source data 1. [file elife-92464-fig3-figsupp1-data1.xlsx]

## Sheet: HSP82
RT-qPCR HS vs ES				Related to Fig. 3; Fig. 3-Fig. Supp. 1
Strain: W303-1B
N=2, qPCR=4
Sample	HSP82	SCR1	HSP82	SCR1	HSP82/SCR1
	ng	ng	average biol rep
NS A	0.396933	37.7236	0.397666	41.7789	0.00951836
	0.3984	45.8341
NS B	0.560068	50.0668	0.557998	51.0186	0.0109371
	0.555927	51.9704
10 MIN ES A	1.45431	58.963	1.44644	61.9824	0.0233362
	1.43856	65.0018
10 MIN ES B	0.691688	51.2013	0.700825	51.4818	0.0136131
	0.709962	51.7624
20 MIN ES A	2.24877	61.9658	2.17796	64.1912	0.0339292
	2.10714	66.4165
20 MIN ES B	1.48123	53.8911	1.49474	58.3125	0.0256332
	1.50824	62.7339
60 MIN ES A	3.27715	58.2258	3.39519	65.1079	0.0521472
	3.51323	71.99
60 MIN ES B	2.5966	63.6346	2.50392	66.6801	0.0375513
	2.41125	69.7256

## Sheet: SSA4
RT-qPCR HS vs ES				Related to Fig. 3; Fig. 3-Fig. Supp. 1
Strain: W303-1B
N=2, qPCR=4
Sample	SSA4	SCR1	SSA4	SCR1	SSA4/SCR1
	ng	ng	average biol rep
NS A	0.0130197	37.7236	0.0132435	41.7789	0.00031699
	0.0134673	45.8341
NS B	0.020141	50.0668	0.0184395	51.0186	0.000361427
	0.016738	51.9704
10 MIN ES A	1.29634	58.963	1.20326	61.9824	0.0194129
	1.11018	65.0018
10 MIN ES B	0.621309	51.2013	0.565097	51.4818	0.0109766
	0.508885	51.7624
20 MIN ES A	3.04434	61.9658	2.90897	64.1912	0.0453173
	2.77361	66.4165
20 MIN ES B	1.95463	53.8911	1.91411	58.3125	0.0328249
	1.87358	62.7339
60 MIN ES A	7.68933	58.2258	6.98683	65.1079	0.107312
	6.28434	71.99
60 MIN ES B	4.72461	63.6346	4.5649	66.6801	0.0684597
	4.40519	69.7256

## Sheet: TMA10
RT-qPCR HS vs ES				Related to Fig. 3; Fig. 3-Fig. Supp. 1
Strain: W303-1B
N=2, qPCR=4
Sample	TMA10	SCR1	TMA10	SCR1	TMA10/SCR1
	ng	ng	average biol rep
NS A	0.00658723	37.7236	0.00669356	41.7789	0.000160214
	0.0067999	45.8341
NS B	0.0122488	50.0668	0.0118381	51.0186	0.000232035
	0.0114273	51.9704
10 MIN ES A	0.107173	58.963	0.0960211	61.9824	0.00154917
	0.0848695	65.0018
10 MIN ES B	0.051529	51.2013	0.0497576	51.4818	0.000966507
	0.0479862	51.7624
20 MIN ES A	0.532455	61.9658	0.515561	64.1912	0.00803165
	0.498667	66.4165
20 MIN ES B	0.184318	53.8911	0.192763	58.3125	0.00330569
	0.201209	62.7339
60 MIN ES A	2.54266	58.2258	2.51846	65.1079	0.0386814
	2.49426	71.99
60 MIN ES B	1.75887	63.6346	1.71799	66.6801	0.0257647
	1.67711	69.7256

## Sheet: HSP104
RT-qPCR HS vs ES				Related to Fig. 3; Fig. 3-Fig. Supp. 1
Strain: W303-1B
N=2, qPCR=4
Sample	HSP104	SCR1	HSP104	SCR1	HSP104/SCR1
	ng	ng	average biol rep
NS A	0.118278	37.7236	0.123543	41.7789	0.00295706
	0.128807	45.8341
NS B	0.202519	50.0668	0.205657	51.0186	0.00403102
	0.208795	51.9704
10 MIN ES A	1.54979	58.963	1.57921	61.9824	0.0254783
	1.60862	65.0018
10 MIN ES B	0.72777	51.2013	0.709974	51.4818	0.0137908
	0.692179	51.7624
20 MIN ES A	3.27659	61.9658	3.19664	64.1912	0.0497987
	3.11668	66.4165
20 MIN ES B	1.72221	53.8911	1.68962	58.3125	0.0289752
	1.65702	62.7339
60 MIN ES A	7.25062	58.2258	6.8093	65.1079	0.104585
	6.36798	71.99
60 MIN ES B	5.09244	63.6346	4.7706	66.6801	0.0715447
	4.44876	69.7256

## Sheet: HSP12
RT-qPCR HS vs ES				Related to Fig. 3; Fig. 3-Fig. Supp. 1
Strain: W303-1B
N=2, qPCR=4
Sample	HSP12	SCR1	HSP12	SCR1	HSP12/SCR1
	ng	ng	average biol rep
NS A	0.0216515	37.7236	0.0215227	41.7789	0.000515158
	0.0213939	45.8341
NS B	0.0202888	50.0668	0.0205628	51.0186	0.000403046
	0.0208369	51.9704
10 MIN ES A	0.0369028	58.963	0.0358427	61.9824	0.000578273
	0.0347826	65.0018
10 MIN ES B	0.0210961	51.2013	0.0212842	51.4818	0.00041343
	0.0214722	51.7624
20 MIN ES A	0.041535	61.9658	0.0424068	64.1912	0.000660633
	0.0432786	66.4165
20 MIN ES B	0.023607	53.8911	0.0257038	58.3125	0.000440794
	0.0278007	62.7339
60 MIN ES A	0.410552	58.2258	0.362513	65.1079	0.00556789
	0.314474	71.99
60 MIN ES B	0.222128	63.6346	0.228931	66.6801	0.00343328
	0.235735	69.7256

## Sheet: SCR1
RT-qPCR HS vs ES				Related to Fig. 3; Fig. 3-Fig. Supp. 1
Strain: W303-1B
N=2, qPCR=4
Sample	SCR1 ng	SCR1 average tech rep	average biol rep SCR1	stdev SCR1
NS A	37.7236	41.7789	46.3987	6.5335
	45.8341
NS B	50.0668	51.0186
	51.9704
10 MIN ES A	58.963	61.9824	56.7321	7.42502
	65.0018
10 MIN ES B	51.2013	51.4818
	51.7624
20 MIN ES A	61.9658	64.1912	61.2518	4.15682
	66.4165
20 MIN ES B	53.8911	58.3125
	62.7339
60 MIN ES A	58.2258	65.1079	65.894	1.1117
	71.99
60 MIN ES B	63.6346	66.6801
	69.7256
10 MIN HS A	72.2691	78.7726	69.5304	13.0704
	85.2761
10 MIN HS B	60.2044	60.2882
	60.3721
20 MIN HS A	55.8932	59.069	59.0738	0.00686129
	62.2447
20 MIN HS B	54.2782	59.0787
	63.8791
60 MIN HS A	69.3604	75.8196	71.8052	5.67729
	82.2788
60 MIN HS B	67.4065	67.7907
	68.1749

## Sheet: BTN2
RT-qPCR HS vs ES				Related to Fig. 3; Fig. 3-Fig. Supp. 1
Strain: W303-1B
N=2, qPCR=4
BTN2 ORF
Sample	BTN2	SCR1	BTN2	SCR1	BTN2/SCR1
	ng	ng	average biol rep
NS A	0.306194	46.448	0.315979	49.6181	0.00636821
	0.325763	52.7883
NS B	0.384596	65.5099	0.396348	66.6703	0.0059449
	0.4081	67.8307
10 MIN ES A	3.8678	77.6024	3.96154	77.9841	0.0507993
	4.05528	78.3658
10 MIN ES B	1.95331	59.5453	1.85861	62.6966	0.0296445
	1.76391	65.8479
20 MIN ES A	9.55202	87.7608	9.43901	85.5793	0.110295
	9.32599	83.3979
20 MIN ES B	5.96113	73.1901	5.63601	75.9847	0.0741729
	5.31089	78.7794
60 MIN ES A	18.2919	84.4787	18.1847	83.4426	0.21793
	18.0774	82.4065
60 MIN ES B	14.1166	85.0825	13.7525	79.0138	0.174052
	13.3884	72.9451

## Sheet: MDJ1
RT-qPCR HS vs ES				Related to Fig. 3; Fig. 3-Fig. Supp. 1
Strain: W303-1B
N=2, qPCR=4
Sample	MDJ1	SCR1	MDJ1	SCR1	MDJ1/SCR1
	ng	ng	average biol rep
NS A	0.267463	46.448	0.27425	49.6181	0.00552721
	0.281037	52.7883
NS B	0.474311	65.5099	0.458182	66.6703	0.00687235
	0.442053	67.8307
10 MIN ES A	0.619915	77.6024	0.620038	77.9841	0.00795083
	0.620161	78.3658
10 MIN ES B	0.378243	59.5453	0.387975	62.6966	0.00618814
	0.397707	65.8479
20 MIN ES A	0.855717	87.7608	0.83506	85.5793	0.00975773
	0.814403	83.3979
20 MIN ES B	0.434186	73.1901	0.43843	75.9847	0.00576997
	0.442674	78.7794
60 MIN ES A	1.22102	84.4787	1.20114	83.4426	0.0143949
	1.18127	82.4065
60 MIN ES B	0.801784	85.0825	0.808952	79.0138	0.0102381
	0.81612	72.9451

## Sheet: HSP26
RT-qPCR HS vs ES				Related to Fig. 3; Fig. 3-Fig. Supp. 1
Strain: W303-1B
N=2, qPCR=4
Sample	HSP26	SCR1	HSP26	SCR1	HSP26/SCR1
	ng	ng	average biol rep
NS A	0.0131469	46.448	0.0124141	49.6181	0.000250193
	0.0116813	52.7883
NS B	0.0178023	65.5099	0.0172595	66.6703	0.000258879
	0.0167168	67.8307
10 MIN ES A	0.0643671	77.6024	0.0591868	77.9841	0.00075896
	0.0540065	78.3658
10 MIN ES B	0.0358243	59.5453	0.0332268	62.6966	0.000529961
	0.0306293	65.8479
20 MIN ES A	0.398339	87.7608	0.38297	85.5793	0.00447503
	0.367601	83.3979
20 MIN ES B	0.254836	73.1901	0.249325	75.9847	0.00328126
	0.243815	78.7794
60 MIN ES A	13.8457	84.4787	12.7236	83.4426	0.152484
	11.6016	82.4065
60 MIN ES B	8.73353	85.0825	8.43517	79.0138	0.106756
	8.13681	72.9451
