# Supplementary material for: Heat Shock Factor 1 forms nuclear condensates and restructures the yeast genome before activating target genes
Source: eLife. 2024 Oct 15;12:RP92464. doi: 10.7554/eLife.92464 (PMC11479590; doi:10.7554/eLife.92464)
Supplement: Figure 3—figure supplement 2—source data 1. [file elife-92464-fig3-figsupp2-data1.xlsx]

## Sheet: HSP82
RT-qPCR HS vs ES
Strain: W303-1B
N=2, qPCR=4
	HSP82	SCR1	HSP82	SCR1	HSP82/SCR1
Sample	ng	ng	average biol rep
NS A	0.153214	127.077	0.149512	131.141	0.00114009
	0.145809	135.204
NS B	0.121053	127.906	0.12006	129.204	0.000929229
	0.119068	130.503
60 MIN ES A	1.24697	129.52	1.28687	131.204	0.00980819
	1.32677	132.887
60 MIN ES B	0.878275	117.204	0.916637	107.194	0.00855122
	0.955	97.1838
90 MIN ES A	0.712	85.5763	0.748288	88.2017	0.00848382
	0.784575	90.8271
90 MIN ES B	0.516995	83.945	0.530433	84.7477	0.00625896
	0.543871	85.5504
120 MIN ES A	0.635823	83.5504	0.633067	79.5524	0.00795786
	0.630311	75.5543
120 MIN ES B	0.348684	99.6325	0.354557	102.158	0.00347068
	0.36043	104.683
180 MIN ES A	0.489696	72.534	0.465651	73.188	0.00636239
	0.441606	73.8421
180 MIN ES B	0.317437	48.9177	0.297022	48.0471	0.00618188
	0.276606	47.1766
240 MIN ES A	0.378712	33.4702	0.373817	33.819	0.0110535
	0.368923	34.1677
240 MIN ES B	0.468086	38.633	0.502136	38.353	0.0130925
	0.536185	38.073
60 MIN HS A	7.03062	129.221	6.88021	126.268	0.0544891
	6.72981	123.315
60 MIN HS B	5.94414	126.698	5.90839	129.102	0.0457654
	5.87264	131.505
90 MIN HS A	5.4194	129.981	5.22639	127.478	0.0409983
	5.03339	124.976
90 MIN HS B	5.30398	119.347	5.32872	114.106	0.0466997
	5.35346	108.865
120 MIN HS A	4.14176	157.823	4.29533	160.051	0.0268373
	4.44889	162.279
120 MIN HS B	2.91012	146.248	2.93174	140.125	0.0209223
	2.95336	134.003
180 MIN HS A	1.75564	146.852	1.75943	140.919	0.0124854
	1.76322	134.987
180 MIN HS B	1.66113	139.048	1.65258	139.421	0.0118532
	1.64404	139.793
240 MIN HS A	1.35076	131.877	1.35747	126.763	0.0107087
	1.36419	121.649
240 MIN HS B	1.50143	116.854	1.43619	114.317	0.0125632
	1.37096	111.781

## Sheet: SSA4
RT-qPCR HS vs ES
Strain: W303-1B
N=2, qPCR=4
	SSA4	SCR1	SSA4	SCR1	SSA4/SCR1
Sample	ng	ng	average biol rep
NS A	0.0121099	127.077	0.0118339	131.141	9.02381e-05
	0.0115578	135.204
NS B	0.00907595	127.906	0.00960703	129.204	7.43553e-05
	0.0101381	130.503
60 MIN ES A	2.92774	129.52	2.87036	131.204	0.0218771
	2.81298	132.887
60 MIN ES B	2.76945	117.204	2.33879	107.194	0.0218183
	1.90812	97.1838
90 MIN ES A	1.84439	85.5763	1.79088	88.2017	0.0203044
	1.73737	90.8271
90 MIN ES B	1.75351	83.945	1.65528	84.7477	0.0195318
	1.55705	85.5504
120 MIN ES A	2.03132	83.5504	2.19154	79.5524	0.0275484
	2.35177	75.5543
120 MIN ES B	1.81797	99.6325	1.72264	102.158	0.0168626
	1.62731	104.683
180 MIN ES A	1.3234	72.534	1.39473	73.188	0.0190568
	1.46607	73.8421
180 MIN ES B	0.991777	48.9177	1.02354	48.0471	0.0213029
	1.05531	47.1766
240 MIN ES A	0.752145	33.4702	0.74301	33.819	0.0219702
	0.733875	34.1677
240 MIN ES B	0.900463	38.633	0.907431	38.353	0.02366
	0.914399	38.073
60 MIN HS A	10.7072	129.221	10.63	126.268	0.084186
	10.5527	123.315
60 MIN HS B	8.85231	126.698	8.83835	129.102	0.0684604
	8.82438	131.505
90 MIN HS A	3.21743	129.981	3.13453	127.478	0.0245888
	3.05164	124.976
90 MIN HS B	3.36062	119.347	3.28132	114.106	0.0287567
	3.20201	108.865
120 MIN HS A	1.39969	157.823	1.40141	160.051	0.00875605
	1.40314	162.279
120 MIN HS B	1.07638	146.248	1.11266	140.125	0.00794044
	1.14894	134.003
180 MIN HS A	0.513634	146.852	0.491327	140.919	0.00348658
	0.46902	134.987
180 MIN HS B	0.441801	139.048	0.472776	139.421	0.003391
	0.50375	139.793
240 MIN HS A	0.349096	131.877	0.345606	126.763	0.00272638
	0.342115	121.649
240 MIN HS B	0.386757	116.854	0.36921	114.317	0.00322969
	0.351663	111.781

## Sheet: HSP104
RT-qPCR HS vs ES
Strain: W303-1B
N=2, qPCR=4
	HSP104	SCR1	HSP104	SCR1	HSP104/SCR1
Sample	ng	ng	average biol rep
NS A	0.0766041	127.077	0.0802264	131.141	0.000611758
	0.0838486	135.204
NS B	0.0867965	127.906	0.0831161	129.204	0.000643292
	0.0794358	130.503
60 MIN ES A	3.31376	129.52	3.02314	131.204	0.0230416
	2.73253	132.887
60 MIN ES B	2.86286	117.204	2.81192	107.194	0.0262321
	2.76097	97.1838
90 MIN ES A	2.10113	85.5763	2.24511	88.2017	0.0254542
	2.38908	90.8271
90 MIN ES B	2.06509	83.945	1.82449	84.7477	0.0215285
	1.58389	85.5504
120 MIN ES A	2.63456	83.5504	2.64338	79.5524	0.0332282
	2.6522	75.5543
120 MIN ES B	2.30713	99.6325	2.1195	102.158	0.0207474
	1.93188	104.683
180 MIN ES A	1.98603	72.534	1.92515	73.188	0.0263042
	1.86427	73.8421
180 MIN ES B	1.34822	48.9177	1.33376	48.0471	0.0277594
	1.31931	47.1766
240 MIN ES A	1.14205	33.4702	1.27002	33.819	0.0375534
	1.39798	34.1677
240 MIN ES B	2.00107	38.633	1.79419	38.353	0.0467809
	1.5873	38.073
60 MIN HS A	7.42057	129.221	7.19099	126.268	0.0569504
	6.96141	123.315
60 MIN HS B	6.87203	126.698	7.01597	129.102	0.0543446
	7.15992	131.505
90 MIN HS A	4.12867	129.981	3.9434	127.478	0.0309339
	3.75813	124.976
90 MIN HS B	4.06285	119.347	4.02812	114.106	0.0353016
	3.9934	108.865
120 MIN HS A	2.81079	157.823	2.6809	160.051	0.0167503
	2.55101	162.279
120 MIN HS B	2.01779	146.248	2.03024	140.125	0.0144887
	2.04269	134.003
180 MIN HS A	1.05417	146.852	1.01126	140.919	0.00717617
	0.968351	134.987
180 MIN HS B	1.09783	139.048	1.00994	139.421	0.00724385
	0.922049	139.793
240 MIN HS A	0.84392	131.877	0.789346	126.763	0.00622693
	0.734773	121.649
240 MIN HS B	1.01776	116.854	0.920515	114.317	0.00805227
	0.823272	111.781

## Sheet: BTN2
RT-qPCR HS vs ES
Strain: W303-1B
N=2, qPCR=4
	BTN2	SCR1	BTN2	SCR1	BTN2/SCR1
Sample	ng	ng	average biol rep
NS A	0.0829277	127.077	0.0870047	131.141	0.000663446
	0.0910816	135.204
NS B	0.055367	127.906	0.0535623	129.204	0.000414555
	0.0517575	130.503
60 MIN ES A	4.64166	129.52	5.00321	131.204	0.0381332
	5.36476	132.887
60 MIN ES B	5.25481	117.204	5.14103	107.194	0.0479601
	5.02724	97.1838
90 MIN ES A	3.74904	85.5763	3.75722	88.2017	0.0425981
	3.76541	90.8271
90 MIN ES B	3.08726	83.945	3.00205	84.7477	0.0354234
	2.91684	85.5504
120 MIN ES A	3.79638	83.5504	3.54979	79.5524	0.0446221
	3.30321	75.5543
120 MIN ES B	2.88119	99.6325	2.94663	102.158	0.0288439
	3.01207	104.683
180 MIN ES A	1.69901	72.534	1.81359	73.188	0.0247799
	1.92818	73.8421
180 MIN ES B	1.70501	48.9177	1.77435	48.0471	0.0369294
	1.84369	47.1766
240 MIN ES A	0.690272	33.4702	0.692713	33.819	0.020483
	0.695153	34.1677
240 MIN ES B	1.13451	38.633	1.0448	38.353	0.0272418
	0.9551	38.073
60 MIN HS A	2.30023	129.221	2.19971	126.268	0.017421
	2.09918	123.315
60 MIN HS B	2.14326	126.698	2.15159	129.102	0.0166659
	2.15992	131.505
90 MIN HS A	1.50956	129.981	1.5132	127.478	0.0118702
	1.51683	124.976
90 MIN HS B	1.64366	119.347	1.53106	114.106	0.0134179
	1.41846	108.865
120 MIN HS A	1.12684	157.823	1.0761	160.051	0.00672348
	1.02536	162.279
120 MIN HS B	0.921958	146.248	0.89342	140.125	0.00637586
	0.864882	134.003
180 MIN HS A	0.431296	146.852	0.401097	140.919	0.00284629
	0.370899	134.987
180 MIN HS B	0.336853	139.048	0.344535	139.421	0.00247119
	0.352217	139.793
240 MIN HS A	0.372672	131.877	0.363046	126.763	0.00286396
	0.35342	121.649
240 MIN HS B	0.385474	116.854	0.35449	114.317	0.00310092
	0.323505	111.781

## Sheet: MDJ1
RT-qPCR HS vs ES
Strain: W303-1B
N=2, qPCR=4
	MDJ1	SCR1	MDJ1	SCR1	MDJ1/SCR1
Sample	ng	ng	average biol rep
NS A	0.0414285	127.077	0.0418039	131.141	0.000318772
	0.0421793	135.204
NS B	0.043404	127.906	0.0448553	129.204	0.000347166
	0.0463066	130.503
60 MIN ES A	0.160005	129.52	0.148511	131.204	0.00113191
	0.137018	132.887
60 MIN ES B	0.140932	117.204	0.135385	107.194	0.001263
	0.129839	97.1838
90 MIN ES A	0.0946122	85.5763	0.0896974	88.2017	0.00101696
	0.0847826	90.8271
90 MIN ES B	0.0859022	83.945	0.0848585	84.7477	0.00100131
	0.0838148	85.5504
120 MIN ES A	0.120985	83.5504	0.119468	79.5524	0.00150176
	0.117951	75.5543
120 MIN ES B	0.119779	99.6325	0.117398	102.158	0.00114918
	0.115016	104.683
180 MIN ES A	0.0800011	72.534	0.0794685	73.188	0.00108581
	0.078936	73.8421
180 MIN ES B	0.0612245	48.9177	0.0633927	48.0471	0.00131939
	0.0655609	47.1766
240 MIN ES A	0.0803339	33.4702	0.0809178	33.819	0.00239268
	0.0815017	34.1677
240 MIN ES B	0.106905	38.633	0.104177	38.353	0.00271627
	0.101449	38.073
60 MIN HS A	0.557597	129.221	0.534545	126.268	0.00423343
	0.511493	123.315
60 MIN HS B	0.409723	126.698	0.39402	129.102	0.00305201
	0.378317	131.505
90 MIN HS A	0.423479	129.981	0.403747	127.478	0.00316718
	0.384016	124.976
90 MIN HS B	0.441317	119.347	0.453207	114.106	0.0039718
	0.465096	108.865
120 MIN HS A	0.379068	157.823	0.35574	160.051	0.00222267
	0.332412	162.279
120 MIN HS B	0.290329	146.248	0.288613	140.125	0.00205968
	0.286898	134.003
180 MIN HS A	0.120376	146.852	0.121121	140.919	0.000859505
	0.121866	134.987
180 MIN HS B	0.126246	139.048	0.124786	139.421	0.000895034
	0.123326	139.793
240 MIN HS A	0.121211	131.877	0.122966	126.763	0.000970047
	0.124722	121.649
240 MIN HS B	0.123441	116.854	0.12189	114.317	0.00106624
	0.120338	111.781

## Sheet: HSP12
RT-qPCR HS vs ES
Strain: W303-1B
N=2, qPCR=4
	HSP12	SCR1	HSP12	SCR1	HSP12/SCR1
Sample	ng	ng	average biol rep
NS A	0.00830786	127.077	0.00806026	131.141	6.14628e-05
	0.00781267	135.204
NS B	0.00958441	127.906	0.00939845	129.204	7.2741e-05
	0.00921249	130.503
60 MIN ES A	0.0374625	129.52	0.0384725	131.204	0.000293227
	0.0394825	132.887
60 MIN ES B	0.0496984	117.204	0.0515251	107.194	0.000480672
	0.0533517	97.1838
90 MIN ES A	0.0593844	85.5763	0.0572434	88.2017	0.000649005
	0.0551023	90.8271
90 MIN ES B	0.101805	83.945	0.0982976	84.7477	0.00115989
	0.0947904	85.5504
120 MIN ES A	0.140243	83.5504	0.144864	79.5524	0.00182099
	0.149485	75.5543
120 MIN ES B	0.158256	99.6325	0.164941	102.158	0.00161457
	0.171626	104.683
180 MIN ES A	0.210872	72.534	0.207953	73.188	0.00284135
	0.205034	73.8421
180 MIN ES B	0.206073	48.9177	0.207495	48.0471	0.00431856
	0.208916	47.1766
240 MIN ES A	0.482836	33.4702	0.474728	33.819	0.0140373
	0.466621	34.1677
240 MIN ES B	0.822271	38.633	0.783692	38.353	0.0204337
	0.745113	38.073
60 MIN HS A	17.3482	129.221	17.2486	126.268	0.136604
	17.1491	123.315
60 MIN HS B	13.7945	126.698	13.7709	129.102	0.106667
	13.7473	131.505
90 MIN HS A	12.7954	129.981	12.5656	127.478	0.0985705
	12.3358	124.976
90 MIN HS B	13.578	119.347	12.3608	114.106	0.108327
	11.1436	108.865
120 MIN HS A	11.0043	157.823	10.4305	160.051	0.0651697
	9.85657	162.279
120 MIN HS B	10.4215	146.248	10.0508	140.125	0.0717269
	9.68006	134.003
180 MIN HS A	4.06594	146.852	4.07141	140.919	0.0288917
	4.07688	134.987
180 MIN HS B	3.22371	139.048	3.58059	139.421	0.0256819
	3.93747	139.793
240 MIN HS A	2.92611	131.877	2.75912	126.763	0.0217659
	2.59212	121.649
240 MIN HS B	3.03112	116.854	2.86283	114.317	0.0250428
	2.69454	111.781
