# Supplementary material for: Heat Shock Factor 1 forms nuclear condensates and restructures the yeast genome before activating target genes
Source: eLife. 2024 Oct 15;12:RP92464. doi: 10.7554/eLife.92464 (PMC11479590; doi:10.7554/eLife.92464)
Supplement: Figure 3—figure supplement 3—source data 3. [file elife-92464-fig3-figsupp3-data3.xlsx]

## Sheet: Sheet1
	Lane 1													Replicate 1	Stress (min)	H3	Hsp104	Hsp104/H3	Norm to NS
HS 1	Lane 2	1		N/A	0.408511	16607376	N/A	N/A	100	84.0698		0	BR1	Heat Shock	0	16607376	5710547	0.343856	1
	Lane 3	1		N/A	0.419149	24014368	N/A	N/A	100	84.1453		7.5			7.5	24014368	7922461	0.329905	0.959428
	Lane 4	1		N/A	0.42766	23710513	N/A	N/A	100	83.559		20			20	23710513	12743956	0.537481	1.5631
	Lane 5	1		N/A	0.431915	23787217	N/A	N/A	100	83.9137		60			60	23787217	19912255	0.837099	2.43445
	Lane 6	1		N/A	0.434043	19742914	N/A	N/A	100	80.6952		120			120	19742914	20807934	1.05394	3.06507
	Lane 7													Ethanol Stress	0	22833305	9352530	0.4096	1
	Lane 8														7.5	22188606	9637679	0.434353	1.06043
	Lane 9														20	22007468	9445778	0.429208	1.04787
	Lane 10														60	23856401	14862481	0.622998	1.52099
	Lane 11	1		N/A	0.438298	16534982	N/A	N/A	100	83.0343					120	20321484	22191802	1.09204	2.6661
	Lane 12	1		N/A	0.438298	19694081	N/A	N/A	100	87.4783				Replicate 2
ES 1	Lane 13	1		N/A	0.438298	22833305	N/A	N/A	100	83.0159			BR2	Heat Shock	0	19217244	7583732	0.394632	1
	Lane 14	1		N/A	0.438298	22188606	N/A	N/A	100	82.0548					7.5	24745898	9486151	0.383342	0.971393
	Lane 15	1		N/A	0.43617	22007468	N/A	N/A	100	82.0256					20	22699424	19670957	0.866584	2.19593
	Lane 16	1		N/A	0.431915	23856401	N/A	N/A	100	82.9459					60	19348755	24721483	1.27768	3.23765
	Lane 17	1		N/A	0.421277	20321484	N/A	N/A	100	80.8335					120	16285121	24542084	1.50702	3.81881
	Lane 18													Ethanol Stress	0	18800704	6810606	0.362253	1
															7.5	22082166	6419554	0.290712	0.802512
	Gross Lab 2022-01-28 20h33m15s														20	24213600	7860393	0.324627	0.896135
	BR2	Band No.	Band Label	Mol. Wt. (KDa)	Relative Front	Volume (Int)	Abs. Quant.	Rel. Quant.	Band %	Lane %					60	25464695	13330224	0.523479	1.44506
	Lane 1														120	32634375	18208108	0.557943	1.5402
HS 2	Lane 2	1		N/A	0.442827	19217244	N/A	N/A	100	51.821
	Lane 3	1		N/A	0.453222	24745898	N/A	N/A	100	73.6707				Replicate 1	Stress (min)	H3	Btn2	Btn2/H3	Norm to NS
	Lane 4	1		N/A	0.459459	22699424	N/A	N/A	100	73.2229			BR1	Heat Shock	0	16607376	9729	0.000585824	1
	Lane 5	1		N/A	0.459459	19348755	N/A	N/A	100	55.6968					7.5	24014368	1496903	0.0623336	106.403
	Lane 6	1		N/A	0.45738	16285121	N/A	N/A	100	51.3146					20	23710513	3240415	0.136666	233.288
	Lane 7														60	23787217	1756907	0.0738593	126.078
ES 2	Lane 8	1		N/A	0.455301	18800704	N/A	N/A	100	53.1786					120	19742914	366224	0.0185496	31.6642
	Lane 9	1		N/A	0.451143	22082166	N/A	N/A	100	59.865				Ethanol Stress	0	22833305	4559	0.000199664	1
	Lane 10	1		N/A	0.444906	24213600	N/A	N/A	100	61.0792					7.5	22188606	6298	0.000283839	1.42158
	Lane 11	1		N/A	0.442827	25464695	N/A	N/A	100	59.1614					20	22007468	30174	0.00137108	6.86692
	Lane 12	1		N/A	0.442827	32634375	N/A	N/A	100	62.694					60	23856401	3272187	0.137162	686.961
															120	20321484	6977714	0.343366	1719.72
														Replicate 2
	Btn2												BR2	Heat Shock	0	19217244	8178	0.000425555	1
	Gross Lab 2022-01-28 20h07m00s														7.5	24745898	1270645	0.0513477	120.66
		Band No.	Band Label	Mol. Wt. (KDa)	Relative Front	Volume (Int)	Abs. Quant.	Rel. Quant.	Band %	Lane %					20	22699424	3220487	0.141875	333.389
	Lane 1														60	19348755	1883854	0.0973631	228.791
HS 1	Lane 2	1		N/A	0.471338	9729	N/A	N/A	100	2.16618					120	16285121	410545	0.0252098	59.2398
	Lane 3	1		N/A	0.469214	1496903	N/A	N/A	100	71.2426				Ethanol Stress	0	18800704	126378	0.00672198	1
	Lane 4	1		N/A	0.471338	3240415	N/A	N/A	100	83.4322					7.5	22082166	71803	0.00325163	0.483731
	Lane 5	1		N/A	0.469214	1756907	N/A	N/A	100	75.3497					20	24213600	400964	0.0165595	2.46348
	Lane 6	1		N/A	0.473461	366224	N/A	N/A	100	52.6238					60	25464695	27177701	1.06727	158.773
HS 2	Lane 7	1		N/A	0.477707	4089	N/A	N/A	100	2.10807					120	32634375	57210825	1.75308	260.799
	Lane 8	1		N/A	0.481953	8178	N/A	N/A	100	2.65123
	Lane 9	1		N/A	0.473461	1270645	N/A	N/A	100	74.798
	Lane 10	1		N/A	0.475584	3220487	N/A	N/A	100	85.0347
	Lane 11	1		N/A	0.471338	1883854	N/A	N/A	100	80.3617
	Lane 12	1		N/A	0.473461	410545	N/A	N/A	100	52.8785
ES 1	Lane 13	1		N/A	0.473461	4559	N/A	N/A	100	1.39348
	Lane 14	1		N/A	0.475584	6298	N/A	N/A	100	1.63614
	Lane 15	1		N/A	0.471338	30174	N/A	N/A	100	7.40655
	Lane 16	1		N/A	0.458599	3272187	N/A	N/A	100	87.4943
	Lane 17	1		N/A	0.44586	6977714	N/A	N/A	100	90.1556
	Gross Lab 2022-01-28 20h44m40s
		Band No.	Band Label	Mol. Wt. (KDa)	Relative Front	Volume (Int)	Abs. Quant.	Rel. Quant.	Band %	Lane %
	Lane 1
HS 2	Lane 2	1		N/A	0.380457	5959	N/A	N/A	100	0.197177
	Lane 3	1		N/A	0.376299	4710442	N/A	N/A	100	65.2522
	Lane 4	1		N/A	0.376299	8907112	N/A	N/A	100	76.6028
	Lane 5	1		N/A	0.367983	6041010	N/A	N/A	100	69.6777
	Lane 6	1		N/A	0.376299	2272503	N/A	N/A	100	48.7187
	Lane 7
ES 2	Lane 8	1		N/A	0.380457	126378	N/A	N/A	100	3.16475
	Lane 9	1		N/A	0.382536	71803	N/A	N/A	100	1.96313
	Lane 10	1		N/A	0.378378	400964	N/A	N/A	100	8.71863
	Lane 11	1		N/A	0.372141	27177701	N/A	N/A	100	83.0245
	Lane 12	1		N/A	0.361746	57210825	N/A	N/A	100	89.4503
