# Supplementary material for: Heat Shock Factor 1 forms nuclear condensates and restructures the yeast genome before activating target genes
Source: eLife. 2024 Oct 15;12:RP92464. doi: 10.7554/eLife.92464 (PMC11479590; doi:10.7554/eLife.92464)
Supplement: Figure 4—figure supplement 1—source data 1. [file elife-92464-fig4-figsupp1-data1.xlsx]

## Sheet: HSP82 RT-qPCR
RT-qPCR HS vs ES
Strain: W303-1B
N=2, qPCR=4
Sample	HSP82	SCR1	HSP82	SCR1	HSP82/SCR1
	ng	ng	average biol rep
NS A	0.396933	37.7236	0.397666	41.7789	0.00951836
	0.3984	45.8341
NS B	0.560068	50.0668	0.557998	51.0186	0.0109371
	0.555927	51.9704
10 MIN ES A	1.45431	58.963	1.44644	61.9824	0.0233362
	1.43856	65.0018
10 MIN ES B	0.691688	51.2013	0.700825	51.4818	0.0136131
	0.709962	51.7624
20 MIN ES A	2.24877	61.9658	2.17796	64.1912	0.0339292
	2.10714	66.4165
20 MIN ES B	1.48123	53.8911	1.49474	58.3125	0.0256332
	1.50824	62.7339
60 MIN ES A	3.27715	58.2258	3.39519	65.1079	0.0521472
	3.51323	71.99
60 MIN ES B	2.5966	63.6346	2.50392	66.6801	0.0375513
	2.41125	69.7256
10 MIN HS A	6.04852	72.2691	6.69183	78.7726	0.0849513
	7.33514	85.2761
10 MIN HS B	6.92175	60.2044	6.88881	60.2882	0.114265
	6.85588	60.3721
20 MIN HS A	10.435	55.8932	11.3095	59.069	0.191463
	12.1841	62.2447
20 MIN HS B	13.5189	54.2782	13.3992	59.0787	0.226803
	13.2796	63.8791
60 MIN HS A	9.37689	69.3604	9.174	75.8196	0.120998
	8.97111	82.2788
60 MIN HS B	7.44258	67.4065	7.44027	67.7907	0.109754
	7.43797	68.1749

## Sheet: HSP104 RT-qPCR
RT-qPCR HS vs ES
Strain: W303-1B
N=2, qPCR=4
Sample	HSP104	SCR1	HSP104	SCR1	HSP104/SCR1
	ng	ng	average biol rep
NS A	0.118278	37.7236	0.123543	41.7789	0.00295706
	0.128807	45.8341
NS B	0.202519	50.0668	0.205657	51.0186	0.00403102
	0.208795	51.9704
10 MIN ES A	1.54979	58.963	1.57921	61.9824	0.0254783
	1.60862	65.0018
10 MIN ES B	0.72777	51.2013	0.709974	51.4818	0.0137908
	0.692179	51.7624
20 MIN ES A	3.27659	61.9658	3.19664	64.1912	0.0497987
	3.11668	66.4165
20 MIN ES B	1.72221	53.8911	1.68962	58.3125	0.0289752
	1.65702	62.7339
60 MIN ES A	7.25062	58.2258	6.8093	65.1079	0.104585
	6.36798	71.99
60 MIN ES B	5.09244	63.6346	4.7706	66.6801	0.0715447
	4.44876	69.7256
10 MIN HS A	7.9383	72.2691	7.69191	78.7726	0.0976471
	7.44552	85.2761
10 MIN HS B	7.08051	60.2044	6.39647	60.2882	0.106098
	5.71243	60.3721
20 MIN HS A	10.091	55.8932	9.81253	59.069	0.16612
	9.53408	62.2447
20 MIN HS B	14.0506	54.2782	14.7384	59.0787	0.249471
	15.4262	63.8791
60 MIN HS A	2.98644	69.3604	2.90733	75.8196	0.0383453
	2.82821	82.2788
60 MIN HS B	2.0255	67.4065	2.05884	67.7907	0.0303705
	2.09217	68.1749

## Sheet: SSA4 RT-qPCR
RT-qPCR HS vs ES
Strain: W303-1B
N=2, qPCR=4
Sample	SSA4	SCR1	SSA4	SCR1	SSA4/SCR1
	ng	ng	average biol rep
NS A	0.0130197	37.7236	0.0132435	41.7789	0.00031699
	0.0134673	45.8341
NS B	0.020141	50.0668	0.0184395	51.0186	0.000361427
	0.016738	51.9704
10 MIN ES A	1.29634	58.963	1.20326	61.9824	0.0194129
	1.11018	65.0018
10 MIN ES B	0.621309	51.2013	0.565097	51.4818	0.0109766
	0.508885	51.7624
20 MIN ES A	3.04434	61.9658	2.90897	64.1912	0.0453173
	2.77361	66.4165
20 MIN ES B	1.95463	53.8911	1.91411	58.3125	0.0328249
	1.87358	62.7339
60 MIN ES A	7.68933	58.2258	6.98683	65.1079	0.107312
	6.28434	71.99
60 MIN ES B	4.72461	63.6346	4.5649	66.6801	0.0684597
	4.40519	69.7256
10 MIN HS A	14.2898	72.2691	14.2018	78.7726	0.180288
	14.1137	85.2761
10 MIN HS B	10.7291	60.2044	10.2839	60.2882	0.170579
	9.83867	60.3721
20 MIN HS A	25.0275	55.8932	22.7894	59.069	0.385811
	20.5514	62.2447
20 MIN HS B	26.1915	54.2782	28.2432	59.0787	0.478061
	30.295	63.8791
60 MIN HS A	9.04504	69.3604	7.98306	75.8196	0.10529
	6.92108	82.2788
60 MIN HS B	6.4678	67.4065	6.4403	67.7907	0.0950027
	6.41281	68.1749

## Sheet: TMA10 RT-qPCR
RT-qPCR HS vs ES
Strain: W303-1B
N=2, qPCR=4
Sample	TMA10	SCR1	TMA10	SCR1	TMA10/SCR1
	ng	ng	average biol rep
NS A	0.00658723	37.7236	0.00669356	41.7789	0.000160214
	0.0067999	45.8341
NS B	0.0122488	50.0668	0.0118381	51.0186	0.000232035
	0.0114273	51.9704
10 MIN ES A	0.107173	58.963	0.0960211	61.9824	0.00154917
	0.0848695	65.0018
10 MIN ES B	0.051529	51.2013	0.0497576	51.4818	0.000966507
	0.0479862	51.7624
20 MIN ES A	0.532455	61.9658	0.515561	64.1912	0.00803165
	0.498667	66.4165
20 MIN ES B	0.184318	53.8911	0.192763	58.3125	0.00330569
	0.201209	62.7339
60 MIN ES A	2.54266	58.2258	2.51846	65.1079	0.0386814
	2.49426	71.99
60 MIN ES B	1.75887	63.6346	1.71799	66.6801	0.0257647
	1.67711	69.7256
10 MIN HS A	6.60978	72.2691	6.40393	78.7726	0.0812964
	6.19808	85.2761
10 MIN HS B	4.5326	60.2044	4.379	60.2882	0.0726344
	4.22539	60.3721
20 MIN HS A	4.30477	55.8932	4.34963	59.069	0.0736365
	4.3945	62.2447
20 MIN HS B	7.18777	54.2782	6.94895	59.0787	0.117622
	6.71014	63.8791
60 MIN HS A	1.39412	69.3604	1.44497	75.8196	0.019058
	1.49582	82.2788
60 MIN HS B	0.75579	67.4065	0.802492	67.7907	0.0118378
	0.849194	68.1749

## Sheet: Pol II ChIP
Pol II ChIP		Strain: BY4741
		n=2, qPCR=2
	HSP82						HSP104						SSA4						TMA10
	Prom		ORF				Prom		ORF				Prom		ORF				Prom		ORF				HSP12 ORF
Treatment	AV %IP	St Dev	AV %IP	St Dev		Treatment	AV %IP	St Dev	AV %IP	St Dev		Treatment	AV %IP	St Dev	AV %IP	St Dev		Treatment	AV %IP	St Dev	AV %IP	St Dev		Treatment	AV %IP	St Dev
NHS	0.511097	0.271315	0.520266	0.102702		NHS	0.75773	0.324049	0.524456	0.219283		NHS	0.847889	0.335678	0.42568	0.215111		NHS	0.30981	0.19384	0.468334	0.209633		NHS	0.219827	0.135655
HS 2.5 min	11.73	4.51154	9.80194	6.99585		HS 2.5 min	11.6316	2.92165	5.57539	1.42319		HS 2.5 min	7.70266	2.12342	5.51848	1.26175		HS 2.5 min	3.19778	1.22268	4.33716	1.35963		HS 2.5 min	2.45677	1.42348
HS 10 min	9.86834	2.21231	7.13024	3.81844		HS 10 min	9.48231	0.817027	7.12475	3.49696		HS 10 min	9.17163	2.66693	8.57752	3.83453		HS 10 min	5.50955	1.68271	9.30359	3.49009		HS 10 min	13.5966	5.87071
HS 20 min	6.28205	0.026245	4.52555	0.27021		HS 20 min	6.43015	0.302165	4.32402	0.46054		HS 20 min	5.02593	0.293898	4.91655	0.121331		HS 20 min	3.00761	0.747553	5.44155	0.464585		HS 20 min	10.5496	0.0395126
HS 60 min	4.29728	1.00305	3.95838	1.60613		HS 60 min	4.06137	0.414252	3.3397	1.36521		HS 60 min	2.98392	1.19786	2.69476	1.25561		HS 60 min	2.9718	0.733217	4.65576	1.11473		HS 60 min	3.93825	0.0454447
NHS	0.511097	0.271315	0.520266	0.102702		NHS	0.75773	0.324049	0.524456	0.219283		NHS	0.847889	0.335678	0.42568	0.215111		NHS	0.30981	0.19384	0.468334	0.209633		NHS	0.219827	0.135655
ES 2.5 min	0.75013	0.30293	0.634305	0.404349		ES 2.5 min	0.820621	0.479225	0.456658	0.283141		ES 2.5 min	1.07099	0.313368	0.4032	0.290517		ES 2.5 min	0.30103	0.244718	0.396541	0.277707		ES 2.5 min	0.29946	0.208768
ES 10 min	5.13199	1.87323	2.02063	0.129765		ES 10 min	4.14952	1.81452	1.3211	0.0690969		ES 10 min	3.03917	1.12501	0.64712	0.146462		ES 10 min	0.89169	0.165901	0.885639	0.0235869		ES 10 min	0.497362	0.226288
ES 20 min	7.47193	0.178426	3.64747	0.686473		ES 20 min	6.39267	0.542549	2.87949	0.599472		ES 20 min	6.05297	0.0016331	2.56082	0.721455		ES 20 min	1.82103	0.743226	2.36318	0.966092		ES 20 min	0.393081	0.182377
ES 60 min	8.58521	5.3504	5.45406	3.69436		ES 60 min	7.50697	5.72802	4.98946	3.79182		ES 60 min	7.49195	4.01446	5.66625	4.24447		ES 60 min	3.39603	2.94241	5.55587	4.20691		ES 60 min	1.9293	2.11917
