# Supplementary material for: Heat Shock Factor 1 forms nuclear condensates and restructures the yeast genome before activating target genes
Source: eLife. 2024 Oct 15;12:RP92464. doi: 10.7554/eLife.92464 (PMC11479590; doi:10.7554/eLife.92464)
Supplement: Figure 4—figure supplement 2—source data 1. — Histone H2A-mCherry volume measurements from cells exposed to HS or ES (Figure 4—figure supplement 2C). [file elife-92464-fig4-figsupp2-data1.xlsx]

## Sheet: Fig4-Fig.Supp.2A
	H3 ChIP
PGM2 ORF					TUB1 ORF					ACT1 ORF
Treatment	Stress Exposure	AV %IP	St Dev		Treatment	Stress Exposure	AV %IP	St Dev		Treatment	Stress Exposure	AV %IP	St Dev
NHS	0 min	13.6194	5.3759		NHS	0 min	10.3051	3.74158		NHS	0 min	6.98549	1.80791
HS 2.5 min	2.5 min	14.4247	6.72002		HS 2.5 min	2.5 min	17.7768	9.25129		HS 2.5 min	2.5 min	13.16	6.57566
HS 10 min	10 min	7.61321	1.22936		HS 10 min	10 min	14.6395	5.21651		HS 10 min	10 min	8.98734	2.09583
HS 20 min	20 min	3.84992	0.390234		HS 20 min	20 min	7.96393	4.06728		HS 20 min	20 min	5.58121	2.14239
HS 60 min	60 min	10.5243	#DIV/0!		HS 60 min	60 min	8.63445	#DIV/0!		HS 60 min	60 min	6.84651	#DIV/0!
NHS	0 min	13.6194	5.3759		NHS	0 min	10.3051	3.74158		NHS	0 min	6.98549	1.80791
ES 2.5 min	2.5 min	21.0533	2.90301		ES 2.5 min	2.5 min	17.7688	1.83103		ES 2.5 min	2.5 min	13.6782	0.247603
ES 10 min	10 min	26.5161	2.09138		ES 10 min	10 min	23.7661	2.61981		ES 10 min	10 min	13.1439	1.31406
ES 20 min	20 min	22.9735	10.129		ES 20 min	20 min	20.6721	8.1048		ES 20 min	20 min	11.6596	3.33361
ES 60 min	60 min	17.1214	5.38902		ES 60 min	60 min	22.7	10.2739		ES 60 min	60 min	12.6895	3.94128
ARS504					HMLalpha1 ORF					YFR057W ORF
Treatment	Stress Exposure	AVE %IP	St Dev		Treatment	Stress Exposure	AV %IP	St Dev		Treatment	Stress Exposure	AV %IP	St Dev
NHS	0 min	8.10939	1.87758		NHS	0 min	10.8175	0.170121		NHS	0 min	10.1531	0.97335
HS 2.5 min	2.5 min	16.2469	7.69462		HS 2.5 min	2.5 min	17.0023	7.10115		HS 2.5 min	2.5 min	15.4471	5.75785
HS 10 min	10 min	10.5551	3.02259		HS 10 min	10 min	12.8069	2.36044		HS 10 min	10 min	11.8932	2.36547
HS 20 min	20 min	9.15649	0.369621		HS 20 min	20 min	7.63992	2.35119		HS 20 min	20 min	6.91238	2.33763
HS 60 min	60 min	7.36243	0.493841		HS 60 min	60 min	9.48893	#DIV/0!		HS 60 min	60 min	8.71928	#DIV/0!
NHS	0 min	8.10939	1.87758		NHS	0 min	10.8175	0.170121		NHS	0 min	10.1531	0.97335
ES 2.5 min	2.5 min	14.6195	0.0965436		ES 2.5 min	2.5 min	14.6466	0.172388		ES 2.5 min	2.5 min	15.9746	1.51615
ES 10 min	10 min	18.7051	3.70054		ES 10 min	10 min	18.5859	2.82129		ES 10 min	10 min	20.3395	3.51054
ES 20 min	20 min	17.1439	5.12149		ES 20 min	20 min	17.8636	4.75656		ES 20 min	20 min	17.4534	5.16152
ES 60 min	60 min	15.8079	5.61542		ES 60 min	60 min	19.3368	7.92445		ES 60 min	60 min	18.4211	6.46216

## Sheet: Fig4-Fig.Supp.2C
H2A-mChery vol. (um^3)
Heat Shock (min)																	Ethanol Stress (min)
0		2.5		10		20		30		60		90		120			0		2.5		10		20		30		60		90		120		150		180
Replicate 1	Replicate 2	Replicate 1	Replicate 2	Replicate 1	Replicate 2	Replicate 1	Replicate 2	Replicate 1	Replicate 2	Replicate 1	Replicate 2	Replicate 1	Replicate 2	Replicate 1	Replicate 2		Replicate 1	Replicate 2	Replicate 1	Replicate 2	Replicate 1	Replicate 2	Replicate 1	Replicate 2	Replicate 1	Replicate 2	Replicate 1	Replicate 2	Replicate 1	Replicate 2	Replicate 1	Replicate 2	Replicate 1	Replicate 2	Replicate 1	Replicate 2
1.063	1.006	1.065	1.025	1.006	1.022	1.003	1.054	1.13	1.022	1.046	1.044	1.056	1.006	1.016	1.006		1.109	1.046	1.238	1.02	1.069	1.071	1.077	1.118	1.073	1.086	1.046	1.025	1.025	1.01	1.132	1.016	1.147	1.172	1.69	1.073
1.069	1.06	1.084	1.162	1.039	1.058	1.01	1.094	1.255	1.046	1.232	1.065	1.086	1.014	1.031	1.016		1.202	1.077	1.481	1.044	1.481	1.141	1.202	1.166	1.109	1.339	1.101	1.054	1.198	1.111	1.5	1.073	1.998	1.2	1.855	1.082
1.082	1.208	1.105	1.217	1.115	1.075	1.185	1.134	1.28	1.113	1.253	1.065	1.113	1.022	1.071	1.037		1.253	1.234	1.749	1.084	1.561	1.156	1.443	1.168	1.244	1.396	1.713	1.065	1.217	1.196	1.72	1.094	2.125	1.574	2.393	1.098
1.156	1.325	1.126	1.274	1.158	1.132	1.232	1.187	1.475	1.162	1.267	1.183	1.168	1.025	1.086	1.041		1.28	1.244	1.796	1.122	1.605	1.238	1.591	1.255	1.453	1.413	1.842	1.077	1.257	1.375	1.998	1.168	2.161	1.637	2.865	1.88
1.16	1.494	1.301	1.28	1.198	1.261	1.248	1.251	1.513	1.189	1.316	1.208	1.204	1.031	1.088	1.109		1.289	1.265	1.912	1.145	1.722	1.276	1.627	1.35	1.593	1.487	1.844	1.128	1.635	1.523	2.224	1.308	2.489	1.783	2.911	1.948
1.293	1.557	1.306	1.382	1.208	1.417	1.253	1.299	1.629	1.291	1.401	1.308	1.213	1.031	1.113	1.111		1.327	1.341	1.965	1.166	1.878	1.388	1.711	1.436	1.663	1.595	1.903	1.447	2.144	1.61	2.33	1.314	2.59	2.138	3.065	2.001
1.312	1.601	1.316	1.415	1.234	1.449	1.259	1.331	1.648	1.337	1.453	1.354	1.236	1.035	1.126	1.13		1.388	1.489	2.089	1.204	1.895	1.413	1.994	1.614	1.914	1.682	1.935	1.458	2.214	1.633	2.438	1.365	2.884	2.165	3.107	2.03
1.392	1.612	1.316	1.529	1.255	1.521	1.278	1.373	1.853	1.384	1.578	1.371	1.278	1.05	1.213	1.156		1.392	1.644	2.269	1.257	1.927	1.527	2.068	1.684	1.979	1.918	2.045	1.479	2.41	1.692	2.52	1.441	2.962	2.176	3.124	2.165
1.578	1.667	1.331	1.622	1.314	1.527	1.28	1.449	1.979	1.415	1.582	1.586	1.287	1.054	1.24	1.168		1.405	1.701	2.334	1.322	2.011	1.639	2.151	1.711	2.174	1.933	2.098	1.631	2.425	1.96	2.607	1.622	3.135	2.296	3.23	2.265
1.739	1.813	1.407	1.667	1.481	1.669	1.327	1.487	2.093	1.441	1.62	1.741	1.377	1.06	1.293	1.172		1.472	1.743	2.334	1.348	2.347	1.669	2.294	1.724	2.345	2.015	2.212	1.766	2.467	2.032	2.765	1.629	3.194	2.358	3.241	2.427
1.753	1.922	1.443	1.726	1.502	1.707	1.403	1.72	2.123	1.591	1.648	1.758	1.386	1.065	1.312	1.179		1.779	1.766	2.358	1.35	2.436	1.929	2.305	1.751	2.417	2.049	2.229	1.861	2.628	2.132	2.767	1.726	3.241	2.472	3.251	2.442
1.777	2.093	1.483	1.806	1.644	1.728	1.407	1.726	2.136	1.762	1.648	1.802	1.491	1.071	1.341	1.183		1.8	1.874	2.463	1.479	2.461	1.954	2.311	1.8	2.514	2.142	2.286	1.971	2.7	2.189	2.888	1.791	3.403	2.619	3.361	2.535
1.855	2.104	1.546	1.834	1.682	1.728	1.548	1.779	2.402	1.817	1.654	2.017	1.529	1.079	1.35	1.187		1.867	1.92	2.52	1.542	2.482	1.971	2.355	1.821	2.543	2.157	2.446	2.034	2.717	2.353	2.892	1.874	3.407	2.715	3.391	2.56
1.87	2.21	1.677	1.844	1.715	1.774	1.555	1.794	2.457	1.929	1.654	2.117	1.534	1.086	1.379	1.187		1.895	2.062	2.571	1.578	2.486	2.011	2.486	2.083	2.603	2.237	2.533	2.106	2.791	2.366	2.945	1.889	3.46	2.719	3.473	2.592
1.91	2.22	1.734	1.886	1.787	1.853	1.565	1.819	2.503	1.943	1.669	2.501	1.559	1.096	1.386	1.187		1.924	2.066	2.622	1.682	2.541	2.07	2.562	2.22	2.66	2.355	2.569	2.125	2.945	2.385	2.957	1.903	3.553	2.759	3.511	2.615
1.982	2.227	1.804	1.943	1.823	1.886	1.601	1.889	2.529	2.11	1.694	2.554	1.586	1.105	1.407	1.196		1.96	2.241	2.738	1.743	2.636	2.303	2.615	2.256	2.683	2.434	2.609	2.224	3.139	2.562	3.038	2.146	3.655	2.786	3.65	2.7
2.06	2.412	1.81	1.943	1.918	1.912	1.622	1.899	2.567	2.132	1.764	2.615	1.61	1.111	1.466	1.24		1.963	2.55	2.824	1.747	2.679	2.44	2.658	2.332	2.721	2.438	2.75	2.262	3.236	2.632	3.126	2.269	3.661	2.856	3.716	2.913
2.074	2.423	1.969	1.986	1.994	2.051	1.633	2.03	2.645	2.172	1.905	2.683	1.753	1.113	1.608	1.24		1.973	2.579	3.152	1.751	2.757	2.503	2.687	2.448	2.736	2.529	2.75	3.167	3.329	2.782	3.207	2.339	3.707	2.871	3.748	3.031
2.21	2.448	1.99	2.022	2.074	2.134	1.682	2.062	2.647	2.351	1.943	2.778	1.798	1.122	1.614	1.274		1.992	2.761	3.327	1.912	2.795	2.603	2.744	2.457	2.964	2.989	2.788	3.209	3.334	3.059	3.329	2.444	3.724	2.89	3.836	3.097
2.26	2.45	2.032	2.055	2.203	2.159	1.753	2.11	2.755	2.37	1.988	2.805	1.842	1.134	1.622	1.314		2.013	2.763	3.338	1.963	2.89	2.696	2.784	2.548	2.977	3.12	2.788	3.226	3.34	3.143	3.359	2.489	3.923	2.934	3.855	3.152
2.322	2.47	2.102	2.155	2.224	2.189	1.81	2.212	2.778	2.41	1.992	3.015	1.927	1.143	1.631	1.316		2.02	2.788	3.378	1.971	2.9	2.729	2.884	2.795	2.979	3.152	2.879	3.319	3.593	3.526	3.426	2.615	3.946	3.046	3.872	3.194
2.326	2.505	2.134	2.265	2.398	2.277	1.851	2.387	2.934	2.567	2.034	3.105	1.931	1.143	1.707	1.32		2.134	2.873	3.452	1.979	2.949	3.224	2.909	2.877	2.998	3.188	2.89	3.334	3.663	3.722	3.443	2.641	3.991	3.078	3.881	3.198
2.351	2.82	2.159	2.294	2.431	2.284	1.876	2.404	2.945	2.679	2.06	3.198	2.032	1.147	1.709	1.377		2.167	3.019	3.452	2.068	2.981	3.224	2.993	3.184	3.004	3.312	2.894	3.369	3.722	3.788	3.452	2.708	4.064	3.078	3.959	3.283
2.377	2.827	2.273	2.294	2.446	2.351	2.036	2.425	3.002	2.81	2.248	3.264	2.039	1.168	1.753	1.39		2.197	3.053	3.653	2.119	3.023	3.226	3.04	3.243	3.031	3.317	2.913	3.433	3.792	3.79	3.492	2.748	4.064	3.19	3.999	3.329
2.427	2.871	2.311	2.296	2.446	2.427	2.102	2.431	3.076	2.831	2.256	3.283	2.049	1.175	1.829	1.403		2.269	3.131	3.672	2.144	3.027	3.27	3.04	3.247	3.135	3.38	2.955	3.475	3.802	3.843	3.496	2.805	4.105	3.209	4.064	3.346
2.457	2.886	2.385	2.313	2.453	2.438	2.176	2.567	3.133	2.875	2.288	3.291	2.138	1.177	1.878	1.422		2.341	3.492	3.712	2.172	3.116	3.276	3.141	3.251	3.179	3.395	2.977	3.576	3.91	3.847	3.585	2.829	4.225	3.365	4.172	3.448
2.465	2.941	2.429	2.421	2.467	2.448	2.216	2.588	3.135	2.911	2.292	3.293	2.233	1.187	1.891	1.436		2.36	3.517	3.805	2.303	3.146	3.477	3.15	3.27	3.19	3.536	3.04	3.614	3.963	3.874	3.672	2.85	4.324	3.452	4.261	3.553
2.514	2.981	2.512	2.425	2.56	2.531	2.25	2.765	3.143	2.913	2.4	3.302	2.317	1.208	1.914	1.439		2.383	3.528	3.866	2.343	3.158	3.519	3.272	3.334	3.211	3.553	3.082	3.64	3.969	3.927	3.731	2.915	4.367	3.496	4.265	3.591
2.827	3.019	2.571	2.467	2.617	2.541	2.252	2.772	3.175	2.951	2.417	3.456	2.347	1.21	1.958	1.451		2.531	3.532	3.929	2.438	3.268	3.598	3.319	3.388	3.306	3.591	3.188	3.769	3.98	3.938	3.735	2.945	4.377	3.631	4.278	3.798
2.983	3.133	2.634	2.467	2.712	2.552	2.277	2.795	3.213	2.983	2.47	3.53	2.393	1.217	1.96	1.466		2.567	3.572	3.961	2.442	3.372	3.619	3.363	3.496	3.435	3.655	3.232	3.838	3.995	3.957	3.79	3.321	4.392	3.674	4.303	3.904
2.987	3.148	2.643	2.565	2.753	2.562	2.374	2.822	3.317	3.327	2.518	3.56	2.393	1.219	1.969	1.477		2.575	3.68	4.096	2.472	3.551	3.908	3.374	3.545	3.477	3.669	3.236	3.841	4.075	3.967	3.794	3.359	4.464	3.682	4.316	4.183
3.04	3.156	2.715	2.569	2.843	2.586	2.508	2.822	3.331	3.336	2.537	3.562	2.44	1.24	1.979	1.479		2.639	3.688	4.136	2.554	3.61	3.921	3.456	3.674	3.498	3.788	3.319	3.923	4.092	3.98	3.834	3.386	4.493	3.802	4.356	4.187
3.2	3.283	2.731	2.698	2.862	2.632	2.535	2.824	3.353	3.365	2.577	3.604	2.562	1.267	2.026	1.479		2.704	3.741	4.212	2.613	3.653	4.119	3.513	3.762	3.517	3.802	3.321	4.128	4.155	3.988	3.938	3.56	4.493	3.933	4.388	4.2
3.266	3.295	2.755	2.75	2.877	2.71	2.757	2.881	3.403	3.441	2.681	3.627	2.571	1.284	2.06	1.483		2.721	3.919	4.28	2.615	3.701	4.126	3.604	3.824	3.585	3.845	3.388	4.155	4.157	4.037	3.961	3.623	4.504	3.946	4.512	4.356
3.325	3.329	2.761	2.78	2.881	2.767	2.788	2.886	3.407	3.443	2.865	3.636	2.672	1.327	2.07	1.483		2.723	3.967	4.352	2.693	3.737	4.143	3.623	3.83	3.585	3.933	3.388	4.284	4.168	4.436	3.971	3.659	4.51	3.948	4.597	4.367
3.369	3.367	2.763	2.788	2.922	2.78	2.917	2.894	3.437	3.526	2.932	3.64	2.738	1.327	2.129	1.487		2.776	3.969	4.436	2.746	3.752	4.166	3.625	3.86	3.826	4.029	3.418	4.29	4.242	4.517	3.976	3.991	4.525	3.952	4.724	4.4
3.397	3.369	2.831	2.81	2.932	2.86	3.006	2.915	3.484	3.549	2.964	3.712	2.801	1.339	2.163	1.519		2.797	4.039	4.593	2.818	3.771	4.179	3.682	3.889	3.834	4.086	3.452	4.309	4.267	4.523	4.007	4.033	4.529	4.126	4.874	4.681
3.445	3.431	2.858	2.829	3.034	2.909	3.093	2.93	3.532	3.6	2.966	3.754	2.803	1.35	2.248	1.548		2.808	4.056	4.647	2.827	3.775	4.198	3.729	3.965	3.834	4.261	3.46	4.371	4.369	4.658	4.1	4.105	4.546	4.132	4.882	4.776
3.515	3.486	2.873	2.833	3.048	2.911	3.2	3.114	3.562	3.621	3.126	3.809	2.86	1.379	2.254	1.576		2.829	4.119	4.677	2.981	3.923	4.204	3.762	4.001	3.845	4.348	3.524	4.464	4.369	4.981	4.21	4.105	4.624	4.155	4.895	4.8
3.545	3.496	2.873	2.867	3.057	2.934	3.232	3.171	3.703	3.625	3.131	3.86	2.945	1.39	2.281	1.58		2.856	4.214	4.694	3.038	4.001	4.206	3.824	4.029	3.845	4.354	3.547	4.485	4.398	4.992	4.261	4.326	4.65	4.326	4.905	4.804
3.587	3.526	2.919	2.928	3.069	2.934	3.378	3.228	3.731	3.636	3.179	3.902	2.983	1.392	2.284	1.603		2.886	4.24	4.776	3.15	4.014	4.233	3.834	4.075	3.857	4.36	3.572	4.586	4.405	5.057	4.288	4.43	4.795	4.369	4.912	4.85
3.595	3.553	2.977	3.002	3.074	3.036	3.391	3.327	3.777	3.701	3.196	3.906	2.987	1.394	2.362	1.722		2.89	4.322	4.778	3.399	4.031	4.24	3.944	4.092	3.965	4.561	3.631	4.607	4.654	5.083	4.297	4.447	4.804	4.502	4.926	4.88
3.714	3.595	3.004	3.065	3.086	3.038	3.481	3.372	3.779	3.712	3.196	3.942	2.993	1.417	2.393	1.741		3.236	4.485	4.778	3.435	4.035	4.364	3.984	4.094	4.064	4.601	3.735	4.662	4.81	5.176	4.341	4.525	4.926	4.626	5.005	4.893
3.722	3.604	3.029	3.088	3.12	3.067	3.543	3.386	3.824	3.714	3.228	3.95	3.027	1.417	2.425	1.741		3.241	4.66	4.781	3.553	4.06	4.364	4.012	4.13	4.069	4.654	3.739	4.781	4.827	5.178	4.35	4.62	5.021	4.656	5.091	4.928
3.731	3.644	3.036	3.093	3.122	3.099	3.551	3.399	3.942	3.733	3.264	3.984	3.078	1.443	2.45	1.777		3.285	4.673	4.836	3.718	4.088	4.421	4.037	4.417	4.075	4.664	3.851	4.791	4.884	5.326	4.36	4.65	5.036	4.711	5.142	4.99
3.811	3.669	3.069	3.11	3.131	3.107	3.564	3.407	3.946	3.777	3.266	3.997	3.095	1.477	2.527	1.808		3.437	4.702	4.893	3.741	4.172	4.54	4.045	4.419	4.107	4.728	3.874	4.808	4.918	5.328	4.419	4.664	5.051	4.715	5.15	5.047
3.815	3.688	3.084	3.114	3.15	3.139	3.684	3.452	4.102	3.779	3.298	4.016	3.169	1.481	2.537	1.834		3.519	4.787	4.893	3.75	4.183	4.584	4.086	4.476	4.111	4.747	3.876	4.869	4.977	5.336	4.519	4.743	5.108	4.829	5.157	5.068
3.815	3.688	3.219	3.135	3.171	3.165	3.697	3.467	4.149	3.845	3.334	4.064	3.171	1.489	2.543	1.853		3.672	4.85	4.966	4.043	4.217	4.705	4.121	4.626	4.162	4.867	3.9	4.897	5.017	5.345	4.557	4.781	5.159	4.861	5.18	5.081
3.91	3.716	3.234	3.148	3.222	3.165	3.712	3.479	4.172	3.887	3.334	4.293	3.274	1.491	2.603	1.891		3.722	5.201	4.966	4.143	4.242	4.755	4.16	4.688	4.17	4.88	3.999	4.983	5.138	5.381	4.561	4.816	5.169	4.912	5.184	5.247
3.959	3.731	3.295	3.167	3.264	3.186	3.714	3.545	4.204	3.933	3.416	4.295	3.298	1.502	2.641	1.984		3.845	5.269	5.005	4.217	4.299	4.783	4.168	4.702	4.193	4.912	4.033	5.011	5.228	5.385	4.563	4.852	5.237	5.123	5.237	5.288
3.991	3.862	3.304	3.181	3.338	3.209	3.773	3.619	4.246	4.024	3.492	4.305	3.42	1.504	2.672	2.186		3.898	5.275	5.076	4.29	4.333	4.838	4.229	4.753	4.208	4.992	4.14	5.051	5.256	5.433	4.609	4.855	5.241	5.22	5.243	5.29
3.991	3.879	3.31	3.192	3.361	3.274	3.783	3.627	4.263	4.031	3.541	4.314	3.562	1.508	2.674	2.193		3.912	5.285	5.11	4.297	4.375	4.844	4.274	4.768	4.231	5.068	4.193	5.097	5.29	5.501	4.671	4.905	5.497	5.247	5.4	5.347
3.991	3.893	3.388	3.192	3.422	3.31	3.817	3.629	4.314	4.052	3.587	4.335	3.568	1.513	2.734	2.265		3.917	5.461	5.15	4.379	4.377	4.865	4.32	4.867	4.244	5.089	4.229	5.216	5.302	5.543	4.719	4.939	5.497	5.252	5.463	5.357
3.997	3.917	3.405	3.207	3.424	3.312	3.874	3.64	4.318	4.073	3.614	4.498	3.68	1.519	2.757	2.332		3.944	5.613	5.218	4.506	4.394	4.903	4.335	4.867	4.383	5.157	4.371	5.349	5.328	5.626	4.734	4.971	5.583	5.256	5.524	5.41
4.037	3.923	3.424	3.217	3.426	3.372	3.879	3.644	4.356	4.075	3.682	4.498	3.686	1.525	2.78	2.336		3.95	5.773	5.326	4.506	4.521	4.928	4.345	4.878	4.398	5.157	4.379	5.366	5.359	5.63	4.787	4.973	5.588	5.323	5.63	5.435
4.064	3.938	3.429	3.224	3.479	3.378	3.879	3.657	4.392	4.083	3.686	4.512	3.712	1.565	2.881	2.632		4.003	5.86	5.338	4.557	4.544	4.933	4.364	4.897	4.43	5.167	4.491	5.423	5.425	5.659	4.833	5.013	5.596	5.353	5.714	5.45
4.079	3.94	3.46	3.23	3.515	3.431	3.965	3.686	4.426	4.115	3.786	4.517	3.767	1.57	2.886	2.653		4.041	5.919	5.349	4.567	4.567	4.956	4.383	4.901	4.5	5.184	4.519	5.524	5.524	5.704	4.865	5.021	5.773	5.391	5.735	5.495
4.096	3.969	3.467	3.243	3.541	3.448	3.974	3.707	4.426	4.193	3.792	4.563	3.773	1.576	2.903	2.683		4.043	5.932	5.37	4.569	4.584	4.977	4.457	4.926	4.552	5.222	4.66	5.602	5.566	5.706	4.905	5.028	5.79	5.414	5.744	5.547
4.105	3.98	3.511	3.27	3.629	3.509	4.007	3.716	4.455	4.208	3.906	4.641	3.798	1.586	2.903	2.719		4.1	6.141	5.408	4.601	4.628	4.992	4.582	4.933	4.574	5.224	4.795	5.615	5.575	5.712	4.969	5.047	5.9	5.414	5.769	5.55
4.176	3.991	3.517	3.338	3.655	3.526	4.035	3.722	4.478	4.282	3.94	4.643	3.798	1.591	3.006	2.797		4.138	6.274	5.442	4.772	4.696	5.049	4.612	4.964	4.582	5.231	4.886	5.657	5.6	5.716	5.015	5.171	6.025	5.448	5.888	5.655
4.2	3.997	3.545	3.342	3.661	3.543	4.043	3.733	4.489	4.303	3.986	4.656	3.847	1.591	3.017	2.805		4.202	6.278	5.478	4.778	4.719	5.095	4.633	4.99	4.662	5.247	4.969	5.664	5.661	5.735	5.087	5.195	6.183	5.45	5.976	5.674
4.204	4.045	3.625	3.372	3.712	3.553	4.056	3.758	4.527	4.32	4.003	4.656	3.864	1.597	3.027	2.835		4.322	6.287	5.533	4.795	4.738	5.104	4.635	5	4.675	5.292	5.112	5.727	5.668	5.761	5.129	5.279	6.321	5.547	5.98	5.712
4.236	4.06	3.627	3.401	3.714	3.568	4.111	3.762	4.529	4.36	4.058	4.778	3.925	1.614	3.029	2.922		4.483	6.304	5.778	4.806	4.816	5.114	4.686	5.021	4.69	5.321	5.507	5.731	5.687	5.896	5.209	5.385	6.367	5.556	6.249	5.797
4.246	4.111	3.64	3.403	3.718	3.568	4.121	3.857	4.552	4.371	4.071	4.795	3.931	1.618	3.076	2.928		4.616	6.325	5.805	4.831	4.846	5.114	4.688	5.038	4.717	5.459	5.64	5.757	5.733	5.926	5.29	5.395	6.711	5.594	6.295	5.797
4.293	4.117	3.642	3.464	3.731	3.6	4.132	3.874	4.616	4.375	4.081	4.861	3.944	1.627	3.086	2.998		4.633	6.494	5.828	4.833	4.945	5.182	4.732	5.066	4.831	5.467	5.67	5.852	5.784	5.934	5.317	5.419	6.758	5.611	6.536	5.801
4.301	4.14	3.743	3.488	3.739	3.627	4.143	3.912	4.647	4.386	4.124	4.882	3.946	1.629	3.228	3.021		4.69	6.534	5.839	4.931	5.002	5.216	4.869	5.089	4.865	5.469	5.674	5.866	5.797	5.955	5.421	5.431	6.908	5.617	6.572	5.811
4.318	4.16	3.781	3.494	3.773	3.691	4.153	3.933	4.675	4.407	4.126	4.918	3.974	1.633	3.26	3.076		4.694	6.547	5.847	4.956	5.053	5.218	4.909	5.091	5.036	5.473	5.689	5.875	5.881	5.972	5.446	5.545	6.988	5.642	6.656	5.816
4.324	4.166	3.798	3.509	3.777	3.707	4.172	3.952	4.681	4.438	4.145	4.931	4.016	1.639	3.405	3.137		4.827	6.578	5.869	4.983	5.104	5.231	4.92	5.11	5.038	5.495	5.83	5.883	5.94	5.993	5.6	5.55	7.111	5.645	6.855	5.833
4.352	4.17	3.807	3.524	3.792	3.743	4.223	3.957	4.696	4.445	4.164	4.954	4.048	1.667	3.41	3.19		4.918	6.692	5.993	5.017	5.174	5.239	4.939	5.114	5.081	5.499	5.843	5.915	5.989	6.067	5.714	5.628	7.14	5.649	6.975	5.835
4.383	4.179	3.845	3.534	3.809	3.781	4.242	3.963	4.707	4.457	4.191	4.964	4.052	1.669	3.479	3.266		4.962	6.787	6.014	5.062	5.186	5.277	4.941	5.165	5.089	5.681	5.93	5.915	6.071	6.126	5.816	5.661	7.144	5.657	7.009	5.845
4.394	4.227	3.874	3.551	3.822	3.819	4.309	3.965	4.709	4.462	4.193	4.975	4.094	1.684	3.519	3.289		4.964	6.866	6.014	5.104	5.239	5.332	4.947	5.193	5.093	5.714	6.179	5.923	6.12	6.156	5.917	5.687	7.151	5.668	7.049	5.896
4.411	4.255	3.881	3.555	3.843	3.819	4.434	3.984	4.724	4.468	4.214	5.005	4.109	1.715	3.526	3.327		5.007	6.912	6.061	5.275	5.254	5.359	4.95	5.193	5.127	5.716	6.416	5.964	6.365	6.192	6.067	5.691	7.263	5.676	7.227	5.904
4.426	4.284	3.883	3.568	3.851	3.906	4.47	3.988	4.812	4.512	4.274	5.019	4.204	1.766	3.56	3.395		5.057	6.999	6.238	5.427	5.273	5.45	4.96	5.22	5.159	5.733	6.532	5.978	6.418	6.196	6.192	5.731	7.29	5.678	7.292	5.951
4.426	4.35	3.942	3.572	3.855	3.908	4.474	3.995	4.827	4.519	4.307	5.047	4.284	1.777	3.566	3.441		5.093	7.115	6.28	5.577	5.313	5.488	5.043	5.254	5.167	5.738	6.589	6.023	6.426	6.196	6.337	5.773	7.292	5.712	7.322	5.972
4.451	4.369	3.946	3.612	3.891	3.961	4.519	3.997	4.833	4.521	4.502	5.049	4.343	1.853	3.566	3.464		5.108	7.185	6.437	5.634	5.323	5.492	5.104	5.266	5.197	5.763	6.883	6.035	6.437	6.272	6.384	5.803	7.318	5.725	7.377	5.976
4.491	4.413	3.974	3.667	3.895	3.999	4.567	4.071	4.836	4.54	4.514	5.057	4.383	1.865	3.589	3.625		5.138	7.202	6.475	5.769	5.385	5.556	5.106	5.273	5.22	5.765	6.929	6.054	6.627	6.333	6.443	5.835	7.324	5.833	7.43	6.019
4.529	4.451	3.986	3.72	3.902	4.052	4.571	4.075	4.848	4.552	4.559	5.138	4.388	1.87	3.621	3.638		5.184	7.206	6.551	5.888	5.387	5.615	5.121	5.294	5.239	5.767	7.421	6.086	6.703	6.342	6.494	5.921	7.482	5.862	7.436	6.021
4.533	4.493	4.012	3.737	3.912	4.054	4.603	4.075	4.848	4.574	4.652	5.178	4.415	1.914	3.625	3.648		5.188	7.275	6.574	5.947	5.433	5.621	5.14	5.328	5.269	5.797	8.07	6.137	6.948	6.346	6.553	5.94	7.554	5.885	7.556	6.027
4.544	4.525	4.016	3.75	3.923	4.086	4.631	4.094	4.918	4.576	4.692	5.262	4.459	1.918	3.648	3.764		5.226	7.309	6.597	5.951	5.452	5.63	5.169	5.338	5.315	5.809	8.245	6.149	6.986	6.399	6.566	5.983	7.599	5.907	7.59	6.029
4.557	4.546	4.054	3.76	3.936	4.094	4.633	4.109	4.945	4.586	4.789	5.29	4.506	1.92	3.669	3.828		5.29	7.459	6.701	5.959	5.59	5.642	5.19	5.351	5.332	5.839	8.332	6.149	7.024	6.445	6.646	6.021	7.782	5.951	7.668	6.046
4.639	4.546	4.054	3.773	3.95	4.1	4.647	4.126	4.947	4.588	4.791	5.309	4.571	1.933	3.682	3.955		5.41	7.601	6.773	5.961	5.67	5.651	5.271	5.366	5.406	5.841	8.583	6.164	7.138	6.458	7.21	6.044	7.939	5.959	7.78	6.086
4.65	4.565	4.083	3.781	3.963	4.109	4.698	4.132	4.952	4.616	4.831	5.353	4.588	1.952	3.792	3.959		5.446	7.643	6.851	6.242	5.752	5.674	5.302	5.368	5.454	5.869	8.799	6.219	7.303	6.46	7.309	6.065	7.985	5.974	7.818	6.128
4.673	4.595	4.102	3.815	3.982	4.147	4.726	4.172	4.966	4.626	4.844	5.37	4.609	1.956	3.805	3.995		5.484	7.791	6.853	6.382	5.822	5.693	5.376	5.387	5.484	5.966	9.018	6.221	7.358	6.473	7.428	6.08	8.04	6.019	8.15	6.139
4.719	4.603	4.115	3.822	3.988	4.172	4.812	4.193	4.975	4.645	4.916	5.391	4.612	1.971	3.851	4.052		5.514	7.88	6.954	6.386	5.835	5.719	5.514	5.389	5.547	5.978	9.874	6.221	7.385	6.487	7.501	6.099	8.254	6.042	8.186	6.192
4.738	4.614	4.136	3.822	4.016	4.208	4.823	4.244	5.007	4.658	4.918	5.465	4.622	1.971	3.86	4.088		5.592	7.901	7.035	6.5	5.917	5.721	5.556	5.402	5.655	6.033	10.001	6.257	7.438	6.494	7.533	6.135	8.456	6.044	8.334	6.253
4.743	4.654	4.14	3.828	4.02	4.208	4.825	4.299	5.017	4.69	5.007	5.499	4.635	1.99	3.862	4.136		5.604	7.907	7.058	6.57	6.004	5.735	5.645	5.406	5.702	6.133	10.379	6.268	7.442	6.515	7.658	6.175	8.52	6.08	8.439	6.28
4.743	4.673	4.16	3.83	4.043	4.225	4.863	4.318	5.049	4.696	5.017	5.503	4.681	1.992	3.883	4.145		5.674	7.949	7.102	6.671	6.031	5.738	5.7	5.431	5.858	6.171	10.74	6.276	7.525	6.534	8.044	6.204	8.716	6.101	8.439	6.346
4.751	4.721	4.295	3.845	4.086	4.238	4.874	4.322	5.057	4.7	5.038	5.505	4.686	2.003	3.933	4.164		5.947	7.975	7.123	6.692	6.078	5.773	5.826	5.465	5.898	6.179	10.816	6.285	7.537	6.58	8.066	6.209	8.961	6.145	8.723	6.409
4.772	4.721	4.322	3.845	4.09	4.265	4.882	4.326	5.072	4.711	5.07	5.579	4.728	2.039	3.95	4.195		5.974	8.019	7.421	6.718	6.192	5.776	5.934	5.55	6.012	6.207		6.331	7.734	6.627	8.317	6.285	9.143	6.164	8.729	6.483
4.797	4.736	4.341	3.847	4.094	4.271	4.954	4.377	5.072	4.757	5.116	5.585	4.755	2.041	4.02	4.2		5.976	8.051	7.489	6.752	6.625	5.788	5.949	5.607	6.08	6.234		6.333	7.922	6.64	8.446	6.293	9.28	6.204	9.217	6.509
4.819	4.738	4.373	3.864	4.105	4.299	5.005	4.379	5.11	4.759	5.131	5.67	4.766	2.053	4.088	4.24		6.019	8.066		6.764	6.65	5.797	5.985	5.632	6.177	6.249		6.348	7.989	6.644	8.456	6.295	9.882	6.221	9.918	6.515
4.833	4.743	4.379	3.872	4.134	4.312	5.038	4.419	5.112	4.766	5.157	5.689	4.766	2.058	4.111	4.271		6.092	8.137		6.787	6.661	5.835	6.133	5.649	6.519	6.261		6.369	8.287	6.65	8.545	6.331	10.098	6.245	10.02	6.519
4.852	4.77	4.386	3.902	4.16	4.329	5.062	4.487	5.129	4.772	5.161	5.704	4.797	2.058	4.111	4.284		6.204	8.148		6.817		5.845	6.278	5.678	6.73	6.268		6.39	8.446	6.709	8.617	6.359	10.448	6.253	10.402	6.523
4.901	4.783	4.394	3.919	4.206	4.35	5.097	4.574	5.154	4.783	5.163	5.744	4.833	2.079	4.189	4.288		6.23	8.19		6.872		5.858	6.333	5.748	6.948	6.304		6.416	8.746	6.711	9.677	6.376	10.609	6.268	10.537	6.532
4.916	4.857	4.415	3.942	4.238	4.358	5.146	4.578	5.176	4.816	5.216	5.761	4.928	2.091	4.225	4.324		6.354	8.22		6.897		5.904		5.816		6.308		6.443	9.113	6.779	9.829	6.411		6.283	10.562	6.536
4.918	4.863	4.434	3.978	4.316	4.405	5.148	4.603	5.201	4.816	5.294	5.847	4.939	2.093	4.231	4.331		6.354	8.275		6.921		5.987		5.822		6.346		6.445	9.17	6.853	10.932	6.424		6.289		6.564
4.918	4.947	4.447	3.984	4.324	4.409	5.165	4.624	5.216	4.886	5.298	5.854	4.941	2.106	4.267	4.339		6.376	8.283		6.997		6.01		5.828		6.361		6.462	9.325	6.861		6.435		6.304		6.591
4.92	4.962	4.483	4.026	4.345	4.462	5.169	4.679	5.233	4.92	5.304	5.953	4.945	2.138	4.278	4.343		6.411	8.378		7.049		6.038		5.833		6.376		6.466	9.464	6.868		6.471		6.342		6.612
4.928	4.962	4.529	4.05	4.402	4.489	5.178	4.683	5.264	4.956	5.343	5.955	4.969	2.163	4.326	4.348		6.449	8.454		7.079		6.086		5.89		6.388		6.494	9.703	6.878		6.494		6.348		6.629
4.928	4.969	4.55	4.054	4.409	4.5	5.214	4.688	5.264	4.973	5.37	5.966	4.998	2.163	4.329	4.424		6.466	8.541		7.081		6.122		5.907		6.403		6.606	9.903	6.878		6.506		6.357		6.633
4.933	4.977	4.561	4.058	4.44	4.512	5.245	4.688	5.266	4.979	5.372	6.033	5.036	2.174	4.364	4.436		6.513	8.549		7.104		6.122		5.932		6.428		6.614		6.908		6.523		6.43		6.646
4.966	4.979	4.563	4.062	4.447	4.525	5.266	4.69	5.332	5.009	5.402	6.063	5.045	2.191	4.367	4.436		6.754	8.587		7.218		6.196		5.976		6.445		6.635		6.986		6.564		6.435		6.654
4.994	4.981	4.669	4.107	4.453	4.527	5.307	4.732	5.351	5.03	5.461	6.071	5.047	2.199	4.424	4.517		6.762	8.6		7.254		6.207		5.98		6.479		6.667		7.049		6.574		6.445		6.728
5.002	5.009	4.692	4.147	4.468	4.533	5.313	4.74	5.364	5.085	5.473	6.105	5.055	2.201	4.428	4.527		6.768	8.651		7.457		6.31		6.069		6.509		6.669		7.066		6.597		6.475		6.733
5.045	5.015	4.696	4.151	4.493	4.607	5.323	4.753	5.391	5.116	5.473	6.109	5.059	2.22	4.455	4.529		6.804	8.712		7.461		6.314		6.122		6.591		6.692		7.1		6.608		6.496		6.756
5.076	5.034	4.705	4.153	4.498	4.624	5.326	4.783	5.393	5.235	5.48	6.122	5.097	2.233	4.5	4.552		6.832	8.82		7.476		6.318		6.133		6.593		6.709		7.123		6.675		6.534		6.785
5.089	5.038	4.707	4.157	4.502	4.633	5.328	4.8	5.419	5.247	5.526	6.207	5.154	2.235	4.527	4.555		6.857	8.822		7.542		6.382		6.147		6.61		6.724		7.144		6.699		6.545		6.825
5.114	5.047	4.707	4.162	4.51	4.656	5.336	4.814	5.433	5.264	5.526	6.23	5.165	2.243	4.529	4.664		6.95	8.845		7.613		6.435		6.28		6.669		6.737		7.151		6.72		6.547		6.88
5.119	5.059	4.707	4.174	4.529	4.673	5.338	4.829	5.444	5.292	5.556	6.251	5.169	2.243	4.538	4.711		6.978	8.917		7.662		6.454		6.291		6.718		6.743		7.159		6.739		6.627		6.895
5.133	5.072	4.719	4.242	4.561	4.677	5.343	4.867	5.452	5.3	5.571	6.361	5.186	2.252	4.538	4.774		6.997	8.968		7.715		6.46		6.367		6.749		6.758		7.166		6.764		6.714		6.921
5.148	5.078	4.726	4.263	4.567	4.679	5.353	4.899	5.467	5.304	5.573	6.367	5.186	2.256	4.586	4.795		7.026	9.01		7.892		6.487		6.414		6.756		6.779		7.17		6.781		6.722		6.921
5.174	5.093	4.726	4.269	4.576	4.702	5.362	4.907	5.488	5.338	5.59	6.369	5.203	2.262	4.593	4.802		7.106	9.109		7.901		6.513		6.46		6.758		6.781		7.204		6.817		6.735		6.942
5.184	5.095	4.73	4.309	4.597	4.717	5.366	4.909	5.495	5.359	5.617	6.376	5.313	2.273	4.612	4.831		7.119	9.111		7.903		6.564		6.532		6.766		6.853		7.248		6.859		6.754		6.969
5.222	5.104	4.734	4.324	4.599	4.724	5.376	4.912	5.55	5.425	5.638	6.466	5.359	2.313	4.618	4.831		7.123	9.118		7.913		6.583		6.532		6.866		6.866		7.256		6.883		6.792		6.971
5.224	5.121	4.766	4.331	4.62	4.751	5.378	4.926	5.607	5.435	5.651	6.526	5.374	2.317	4.635	4.84		7.202	9.168		7.951		6.644		6.591		6.88		6.887		7.256		6.91		6.849		6.994
5.231	5.146	4.776	4.358	4.637	4.783	5.381	4.939	5.659	5.435	5.661	6.54	5.423	2.33	4.637	4.863		7.233	9.181		8.101		6.646		6.595		6.891		6.893		7.261		6.927		6.866		7.024
5.239	5.154	4.783	4.377	4.641	4.791	5.381	4.945	5.666	5.457	5.664	6.591	5.457	2.334	4.681	4.903		7.282	9.227		8.133		6.671		6.623		6.891		6.959		7.288		6.94		6.874		7.149
5.245	5.159	4.797	4.379	4.645	4.804	5.412	4.96	5.678	5.463	5.695	6.597	5.52	2.37	4.726	4.926		7.324	9.284		8.161		6.686		6.623		6.99		6.99		7.339		6.975		6.908		7.286
5.296	5.203	4.808	4.379	4.65	4.838	5.442	4.962	5.697	5.467	5.697	6.65	5.55	2.396	4.747	4.998		7.385	9.314		8.285		6.745		6.69		7.062		7.011		7.349		7.142		6.908		7.326
5.298	5.231	4.829	4.398	4.667	4.838	5.45	4.969	5.708	5.48	5.71	6.697	5.554	2.398	4.774	5.007		7.459	9.339		8.287		6.766		6.692		7.081		7.054		7.362		7.159		6.925		7.347
5.315	5.317	4.836	4.407	4.694	4.844	5.459	4.979	5.729	5.486	5.712	6.709	5.569	2.398	4.816	5.007		7.535	9.443		8.389		6.781		6.76		7.106		7.123		7.466		7.248		6.935		7.491
5.328	5.332	4.867	4.43	4.724	4.863	5.471	5.011	5.738	5.492	5.712	6.722	5.577	2.415	4.852	5.064		7.55	9.458		8.41		6.798		6.773		7.109		7.134		7.468		7.25		7.013		7.516
5.338	5.336	4.876	4.432	4.73	4.895	5.478	5.013	5.761	5.539	5.725	6.726	5.588	2.476	4.89	5.161		7.55	9.46		8.53		6.84		6.933		7.111		7.134		7.478		7.286		7.096		7.597
5.362	5.353	4.888	4.457	4.738	4.909	5.49	5.015	5.763	5.543	5.729	6.752	5.653	2.476	4.903	5.26		7.594	9.508		8.53		6.842		6.937		7.125		7.161		7.499		7.294		7.14		7.626
5.374	5.359	4.89	4.464	4.74	4.916	5.49	5.028	5.786	5.566	5.735	6.76	5.708	2.48	4.918	5.266		7.632	9.519		8.554		6.859		6.95		7.14		7.227		7.603		7.398		7.159		7.654
5.389	5.404	4.914	4.464	4.743	4.922	5.499	5.036	5.788	5.579	5.776	6.76	5.735	2.482	4.928	5.277		7.637	9.593		8.577		6.88		6.973		7.195		7.24		7.704		7.428		7.185		7.894
5.393	5.412	4.941	4.521	4.751	4.922	5.514	5.04	5.818	5.585	5.778	6.775	5.754	2.486	4.954	5.298		7.706	9.61		8.744		6.885		6.994		7.244		7.244		7.77		7.542		7.218		8.006
5.4	5.448	4.971	4.523	4.759	4.945	5.516	5.074	5.83	5.602	5.792	6.794	5.763	2.495	4.983	5.309		7.719	9.682		8.898		6.946		7.024		7.292		7.248		7.778		7.55		7.244		8.038
5.412	5.454	4.985	4.525	4.766	4.96	5.55	5.108	5.835	5.602	5.805	6.87	5.78	2.501	5.009	5.319		7.725	9.698		8.898		6.952		7.033		7.379		7.259		7.808		7.556		7.246		8.061
5.421	5.461	4.988	4.555	4.789	4.981	5.552	5.127	5.854	5.678	5.82	6.878	5.786	2.512	5.087	5.37		7.82	9.844		9.069		6.99		7.054		7.413		7.271		7.856		7.588		7.324		8.089
5.425	5.49	4.988	4.563	4.812	4.985	5.554	5.15	5.866	5.687	5.843	6.891	5.83	2.556	5.097	5.374		7.871	9.914		9.172		7.037		7.079		7.417		7.299		7.875		7.597		7.489		8.11
5.425	5.505	4.99	4.66	4.833	4.99	5.617	5.163	5.871	5.687	5.866	6.923	5.833	2.562	5.106	5.383		7.88	9.988		9.386		7.136		7.094		7.451		7.309		7.884		7.643		7.54		8.127
5.429	5.566	5.028	4.69	4.836	4.996	5.659	5.207	5.888	5.697	5.883	6.95	5.833	2.579	5.116	5.408		7.911	10.053		9.388		7.142		7.104		7.453		7.383		7.899		7.666		7.559		8.175
5.438	5.569	5.055	4.755	4.84	5	5.661	5.218	5.915	5.714	5.885	6.963	5.845	2.598	5.125	5.499		7.945	10.087		9.407		7.17		7.115		7.622		7.383		7.901		7.685		7.603		8.22
5.45	5.579	5.085	4.759	4.876	5.015	5.678	5.241	5.923	5.716	5.921	6.984	5.877	2.598	5.135	5.501		7.989	10.153		9.521		7.223		7.248		7.626		7.387		7.913		7.73		7.603		8.237
5.454	5.592	5.097	4.791	4.89	5.019	5.685	5.285	5.928	5.742	5.942	7.02	5.904	2.636	5.186	5.501		8	10.163		9.563		7.324		7.303		7.668		7.398		7.913		7.766		7.607		8.254
5.48	5.592	5.104	4.793	4.924	5.03	5.719	5.307	5.938	5.744	5.945	7.022	5.909	2.653	5.218	5.583		8.023	10.197		9.644		7.326		7.339		7.774		7.463		7.92		7.831		7.664		8.471
5.48	5.594	5.114	4.804	4.935	5.049	5.719	5.323	5.94	5.763	5.953	7.028	5.957	2.658	5.243	5.585		8.068	10.244		9.768		7.373		7.349		7.949		7.466		8.019		7.875		7.808		8.604
5.484	5.598	5.131	4.823	4.954	5.059	5.729	5.368	5.94	5.797	5.959	7.111	5.976	2.662	5.252	5.59		8.087	10.336		9.855		7.377		7.394		7.964		7.468		8.032		8.025		7.939		8.799
5.484	5.615	5.159	4.88	4.966	5.076	5.729	5.368	5.955	5.803	5.976	7.119	5.989	2.679	5.266	5.619		8.095	10.584		10.077		7.387		7.504		8.006		7.51		8.055		8.027		8.087		8.864
5.497	5.628	5.161	4.893	4.983	5.078	5.74	5.376	5.97	5.811	6.014	7.155	5.997	2.706	5.298	5.64		8.169	10.607		10.098		7.419		7.702		8.216		7.537		8.072		8.032		8.116		8.972
5.558	5.638	5.171	5.019	5.028	5.087	5.74	5.423	5.978	5.845	6.069	7.18	6.002	2.708	5.315	5.752		8.196	10.664		10.336		7.485		7.704		8.363		7.683		8.137		8.08		8.148		9.018
5.573	5.649	5.19	5.049	5.032	5.091	5.795	5.433	5.991	5.881	6.071	7.212	6.054	2.719	5.321	5.752		8.224	10.712		10.362		7.527		7.806		8.541		7.7		8.237		8.188		8.175		9.067
5.598	5.666	5.195	5.057	5.047	5.123	5.833	5.467	6.004	5.923	6.078	7.221	6.073	2.723	5.338	5.771		8.385	10.736		10.366		7.742		7.82		8.562		7.725		8.285		8.235		8.325		9.301
5.604	5.676	5.197	5.07	5.051	5.182	5.835	5.469	6.006	5.926	6.086	7.273	6.082	2.734	5.364	5.784		8.471	10.774		10.457		7.742		7.932		8.564		7.81		8.376		8.427		8.397		9.348
5.607	5.676	5.203	5.222	5.053	5.19	5.841	5.482	6.016	5.955	6.088	7.301	6.09	2.736	5.366	5.805		8.494	10.913		10.928		7.85		8.047		8.674		7.833		8.427		8.513		8.486		9.396
5.609	5.695	5.203	5.279	5.057	5.19	5.86	5.509	6.033	5.961	6.092	7.307	6.118	2.738	5.383	5.818		8.623	10.92				7.856		8.085		8.742		7.863		8.486		8.589		8.568		9.458
5.611	5.706	5.22	5.319	5.066	5.243	5.873	5.522	6.044	5.987	6.145	7.33	6.12	2.746	5.478	5.822		8.864	10.968				8.019		8.129		8.754		7.924		8.486		8.64		8.748		9.654
5.611	5.727	5.222	5.362	5.093	5.266	5.875	5.533	6.059	6.171	6.152	7.345	6.137	2.748	5.488	5.835		8.902	10.972				8.264		8.146		8.815		7.968		8.488		8.723		8.767		9.726
5.615	5.729	5.254	5.368	5.104	5.288	5.881	5.545	6.063	6.19	6.202	7.387	6.226	2.748	5.497	5.841		9.105					8.319		8.232		8.963		7.981		8.549		8.758		9.139		9.806
5.636	5.746	5.258	5.4	5.169	5.315	5.902	5.611	6.086	6.198	6.253	7.417	6.236	2.78	5.503	5.911		9.185					8.399		8.285		9.01		8.044		8.575		8.906		9.145		9.899
5.659	5.759	5.292	5.438	5.176	5.315	5.909	5.632	6.105	6.202	6.253	7.43	6.27	2.784	5.562	5.953		9.202					8.416		8.338		9.217		8.063		8.598		8.974		9.202		10.14
5.666	5.799	5.307	5.457	5.184	5.334	6.012	5.634	6.111	6.209	6.257	7.527	6.291	2.799	5.611	5.959		9.261					8.442		8.551		9.377		8.372		8.71		8.989		9.24		10.22
5.721	5.809	5.309	5.49	5.231	5.347	6.012	5.657	6.126	6.245	6.278	7.565	6.38	2.812	5.617	6.069		9.426					8.488		8.57		9.439		8.395		8.763		9.008		9.306		10.417
5.727	5.814	5.326	5.564	5.235	5.349	6.048	5.666	6.128	6.249	6.299	7.588	6.418	2.835	5.623	6.076		9.428					8.49		8.581		9.46		8.547		8.911		9.027		9.61		10.497
5.754	5.841	5.33	5.6	5.241	5.393	6.05	5.668	6.16	6.259	6.325	7.607	6.424	2.841	5.661	6.082		9.525					8.638		8.6		9.601		8.782		8.949		9.287		9.694		10.56
5.765	5.845	5.345	5.668	5.243	5.397	6.084	5.668	6.164	6.308	6.325	7.624	6.46	2.846	5.727	6.084		9.536					8.703		8.908		9.954		8.881		9.058		9.327		9.889
5.788	5.852	5.355	5.702	5.285	5.412	6.097	5.681	6.171	6.325	6.371	7.656	6.494	2.875	5.82	6.095		9.548					8.896		8.908		9.984		8.892		9.221		9.346		10.024
5.799	5.875	5.357	5.721	5.336	5.448	6.099	5.731	6.173	6.354	6.386	7.759	6.498	2.884	5.862	6.107		9.582					8.965		9.118		10.007		8.915		9.453		9.382		10.03
5.811	5.894	5.406	5.727	5.336	5.452	6.105	5.742	6.177	6.376	6.409	7.833	6.54	2.93	5.9	6.109		9.73					9.05		9.483		10.091		8.925		9.491		9.491		10.034
5.816	5.9	5.433	5.748	5.362	5.48	6.12	5.744	6.183	6.378	6.441	7.878	6.606	2.938	5.93	6.133		9.758					9.36		9.506		10.151		8.982		9.58		9.648		10.453
5.839	5.904	5.433	5.957	5.391	5.499	6.12	5.748	6.2	6.386	6.456	7.941	6.627	2.941	5.934	6.143		9.848					9.686		9.815		10.311		9.052		9.591		9.737		10.491
5.852	5.923	5.438	6.025	5.408	5.558	6.135	5.752	6.207	6.39	6.458	7.981	6.637	2.951	5.966	6.179		10.03					9.707		9.984		10.402		9.255		9.679		9.798		10.537
5.864	5.932	5.463	6.044	5.41	5.571	6.147	5.782	6.23	6.443	6.462	8.002	6.682	2.96	5.987	6.185		10.271					9.829		10.148		10.613		9.297		9.686		10.011		10.59
5.873	5.968	5.505	6.05	5.429	5.661	6.149	5.786	6.238	6.483	6.481	8.006	6.758	2.972	5.993	6.198		10.617					9.895		10.413		10.655		9.303		9.747		10.199		10.598
5.894	6.006	5.564	6.052	5.438	5.678	6.152	5.792	6.249	6.487	6.485	8.021	6.775	2.981	6.016	6.204		10.628					10.049				10.932		9.344		9.768		10.267		10.734
5.898	6.035	5.575	6.101	5.438	5.687	6.154	5.818	6.251	6.492	6.494	8.042	6.817	2.996	6.042	6.24		10.757					10.134						9.371		9.817		10.355		10.915
5.915	6.059	5.59	6.321	5.44	5.687	6.219	5.837	6.27	6.494	6.517	8.068	6.844	3.006	6.071	6.24		10.972					10.48						9.475		10.087		10.398
5.926	6.071	5.626	6.418	5.488	5.702	6.226	5.845	6.278	6.538	6.528	8.125	6.849	3.015	6.122	6.261		10.996					10.767						9.527		10.132		10.417
5.926	6.097	5.628	6.557	5.497	5.773	6.226	5.864	6.283	6.551	6.545	8.163	6.855	3.021	6.122	6.289		9.848					10.85						9.874		10.241		10.571
5.93	6.143	5.632	6.682	5.539	5.803	6.232	5.896	6.312	6.557	6.57	8.247	6.87	3.038	6.126	6.34		9.927											9.893		10.36		10.998
5.93	6.173	5.685	6.718	5.543	5.847	6.236	5.909	6.314	6.587	6.576	8.247	6.885	3.05	6.141	6.34		9.96											10.043		10.596
5.936	6.268	5.704	6.937	5.545	5.913	6.264	5.923	6.325	6.633	6.589	8.247	6.887	3.055	6.152	6.352		9.986											10.117		10.862
5.942	6.314	5.721	7.087	5.566	5.928	6.274	5.991	6.348	6.642	6.604	8.351	6.908	3.067	6.177	6.38		10.024											10.125		10.922
5.953	6.321	5.742	7.457	5.59	5.932	6.291	6.021	6.35	6.663	6.606	8.395	6.918	3.08	6.19	6.407		10.123											10.144
5.959	6.335	5.742	7.514	5.602	5.936	6.293	6.063	6.392	6.665	6.608	8.427	6.952	3.116	6.232	6.471		10.163											10.491
5.972	6.441	5.765	7.603	5.666	5.942	6.321	6.086	6.392	6.718	6.659	8.575	6.959	3.116	6.247	6.483		10.246											10.592
5.985	6.5	5.78		5.676	5.964	6.34	6.092	6.418	6.728	6.695	8.674	6.978	3.139	6.261	6.515		10.332											10.909
6.014	6.545	5.833		5.685	5.968	6.35	6.116	6.441	6.733	6.697	8.794	7.007	3.146	6.323	6.517		10.404
6.029	6.593	5.839		5.689	6.057	6.352	6.124	6.454	6.749	6.726	8.815	7.011	3.15	6.34	6.528		10.603
6.042	6.654	5.864		5.708	6.084	6.367	6.164	6.481	6.752	6.745	8.906	7.016	3.162	6.365	6.551		10.753
6.044	6.661	5.881		5.733	6.088	6.376	6.181	6.496	6.781	6.747	8.94	7.018	3.177	6.378	6.604		10.949
6.067	6.711	5.894		5.74	6.257	6.392	6.213	6.504	6.83	6.76	8.944	7.049	3.181	6.409	6.606
6.069	6.718	5.942		5.748	6.259	6.395	6.264	6.523	6.832	6.809	8.946	7.049	3.181	6.452	6.608
6.08	6.718	5.966		5.748	6.272	6.395	6.274	6.547	6.838	6.842	9.014	7.056	3.23	6.542	6.616
6.122	6.728	6.01		5.776	6.297	6.401	6.297	6.549	6.857	6.868	9.067	7.083	3.251	6.583	6.633
6.124	6.798	6.044		5.78	6.329	6.403	6.297	6.549	6.918	6.902	9.111	7.096	3.279	6.595	6.652
6.126	6.823	6.073		5.782	6.557	6.407	6.34	6.553	6.929	6.904	9.164	7.117	3.348	6.608	6.667
6.137	6.908	6.084		5.795	6.57	6.407	6.365	6.568	6.982	6.942	9.289	7.123	3.374	6.627	6.673
6.164	6.908	6.105		5.803	6.627	6.42	6.435	6.574	7.007	6.946	9.312	7.147	3.382	6.646	6.68
6.198	7.041	6.122		5.805	6.65	6.424	6.46	6.576	7.054	6.959	9.32	7.155	3.386	6.659	6.692
6.234	7.094	6.183		5.816	6.688	6.483	6.494	6.58	7.142	6.961	9.422	7.189	3.388	6.678	6.701
6.274	7.144	6.219		5.824	6.705	6.513	6.519	6.583	7.159	6.965	9.502	7.195	3.414	6.692	6.703
6.283	7.147	6.403		5.835	6.724	6.515	6.561	6.583	7.163	6.965	9.504	7.199	3.424	6.707	6.711
6.293	7.174	6.405		5.85	6.745	6.54	6.593	6.583	7.172	6.982	9.582	7.21	3.46	6.718	6.756
6.304	7.197	6.454		5.873	6.992	6.542	6.604	6.589	7.21	7.016	9.601	7.229	3.473	6.783	6.762
6.306	7.223	6.462		5.888	7.045	6.559	6.675	6.599	7.214	7.022	9.673	7.233	3.505	6.828	6.806
6.308	7.324	6.498		5.911	7.079	6.587	6.678	6.604	7.244	7.03	9.781	7.24	3.515	6.838	6.868
6.318	7.398	6.502		5.915	7.125	6.665	6.68	6.659	7.252	7.039	9.848	7.273	3.526	6.842	6.876
6.323	7.459	6.538		5.915	7.149	6.667	6.707	6.673	7.292	7.041	9.929	7.278	3.538	6.887	6.899
6.327	7.565	6.549		5.917	7.153	6.671	6.785	6.675	7.366	7.079	9.996	7.29	3.545	6.916	6.916
6.337	7.622	6.568		5.93	7.208	6.686	6.902	6.737	7.434	7.083	10.051	7.29	3.555	6.918	6.942
6.386	7.768	6.57		5.938	7.214	6.692	7.054	6.749	7.466	7.09	10.083	7.297	3.564	6.925	6.984
6.39	7.808	6.65		5.947	7.337	6.724	7.092	6.798	7.54	7.092	10.134	7.301	3.625	6.933	7.119
6.39	7.818	6.669		5.955	7.497	6.756	7.123	6.811	7.626	7.111	10.237	7.313	3.638	6.954	7.144
6.397	7.846	6.68		5.957	7.523	6.764	7.172	6.83	7.651	7.113	10.239	7.371	3.678	6.956	7.221
6.403	7.905	6.815		5.966	7.751	6.768	7.185	6.842	7.694	7.136	10.296	7.379	3.678	6.988	7.309
6.407	8.013	6.819		5.974	7.987	6.802	7.28	6.844	7.698	7.163	10.349	7.394	3.682	6.999	7.373
6.424	8.042	6.819		5.995	8.222	6.809	7.309	6.844	7.728	7.17	10.355	7.43	3.72	7.018	7.379
6.441	8.254	6.849		6.002	8.731	6.849	7.47	6.876	7.766	7.191	10.358	7.455	3.752	7.02	7.379
6.452	8.33	7.009		6.016	8.811	6.855	7.704	6.921	8.019	7.259	10.379	7.455	3.76	7.02	7.392
6.466	8.549	7.045		6.04	8.828	6.859	7.723	6.923	8.023	7.261	10.425	7.457	3.781	7.047	7.434
6.528	8.67	7.064		6.04	10.184	6.87	7.772	6.999	8.055	7.261	10.573	7.485	3.826	7.064	7.531
6.547	8.993	7.142		6.042	10.317	6.929	7.776	7.041	8.093	7.28		7.489	3.836	7.083	7.542
6.553	9.061	7.159		6.073		6.931	7.787	7.075	8.101	7.286		7.506	3.836	7.123	7.552
6.559	9.215	7.161		6.082		6.933	7.806	7.142	8.188	7.32		7.508	3.887	7.147	7.563
6.589	9.637	7.223		6.109		6.942	7.89	7.144	8.399	7.332		7.512	3.917	7.229	7.573
6.591	10.167	7.292		6.109		6.997	7.954	7.161	8.435	7.366		7.559	3.927	7.231	7.624
6.599	10.689	7.318		6.109		7.001	8.101	7.185	8.467	7.377		7.58	3.931	7.259	7.66
6.604		7.364		6.126		7.03	8.186	7.242	8.541	7.381		7.594	3.933	7.305	7.812
6.612		7.468		6.185		7.104	8.448	7.242	8.739	7.394		7.607	3.94	7.307	7.89
6.625		7.516		6.188		7.115	8.604	7.246	8.818	7.406		7.613	3.955	7.349	7.973
6.642		7.571		6.221		7.117	8.978	7.25	8.828	7.411		7.62	4.001	7.36	7.973
6.682		7.578		6.293		7.138	9.105	7.265	8.864	7.413		7.624	4.018	7.371	8.019
6.72		7.873		6.312		7.155	9.483	7.282	8.925	7.43		7.692	4.094	7.4	8.03
6.741		8.279		6.35		7.163	9.546	7.288	9.044	7.436		7.692	4.115	7.404	8.053
6.745		8.437		6.384		7.172	9.935	7.299	9.306	7.476		7.736	4.147	7.423	8.123
6.781		8.465		6.388		7.195	10.301	7.307	9.523	7.478		7.81	4.204	7.434	8.201
6.878		9.052		6.392		7.199		7.337	9.629	7.489		7.875	4.221	7.444	8.237
6.878		9.143		6.395		7.231		7.339	10.248	7.491		7.899	4.337	7.495	8.26
6.937		9.177		6.403		7.24		7.381	10.33	7.518		7.918	4.345	7.537	8.273
6.944		9.392		6.439		7.261		7.394	10.985	7.537		7.954	4.348	7.554	8.336
6.975				6.443		7.28		7.396		7.537		7.989	4.426	7.559	8.357
6.99				6.456		7.28		7.406		7.563		7.996	4.502	7.586	8.37
6.999				6.509		7.313		7.417		7.567		8.025	4.527	7.592	8.45
7.028				6.521		7.345		7.434		7.575		8.051	4.58	7.597	8.454
7.035				6.53		7.356		7.434		7.58		8.072	4.597	7.603	8.551
7.047				6.561		7.358		7.438		7.586		8.082	4.637	7.605	8.642
7.079				6.561		7.383		7.459		7.635		8.091	4.728	7.616	8.731
7.102				6.568		7.387		7.466		7.639		8.101	4.736	7.624	8.826
7.13				6.57		7.398		7.476		7.643		8.129	4.77	7.666	8.847
7.153				6.612		7.428		7.51		7.694		8.167	4.776	7.668	8.872
7.155				6.646		7.459		7.523		7.698		8.173	4.785	7.73	8.917
7.161				6.688		7.493		7.563		7.7		8.194	4.802	7.81	9.029
7.178				6.692		7.527		7.597		7.734		8.205	4.823	7.837	9.28
7.214				6.743		7.527		7.645		7.736		8.216	4.882	7.848	9.483
7.25				6.802		7.531		7.66		7.755		8.222	4.922	7.863	9.855
7.368				6.832		7.586		7.689		7.763		8.23	5.089	7.886	10.144
7.371				6.84		7.628		7.702		7.768		8.245	5.112	7.93	10.482
7.387				6.895		7.651		7.778		7.806		8.336	5.114	7.93	10.725
7.394				6.929		7.67		7.78		7.873		8.338	5.114	7.97	10.898
7.47				7.085		7.772		7.782		7.918		8.338	5.165	7.989	10.898
7.497				7.121		7.772		7.791		7.93		8.353	5.199	8.04
7.54				7.136		7.778		7.827		7.939		8.382	5.205	8.04
7.561				7.225		7.782		7.854		7.947		8.397	5.26	8.061
7.584				7.299		7.793		7.856		7.949		8.408	5.402	8.078
7.607				7.33		7.795		7.865		7.951		8.412	5.499	8.082
7.616				7.516		7.827		7.882		7.958		8.414	5.778	8.099
7.713				7.744		7.829		7.884		7.975		8.431	5.993	8.114
7.719				7.835		7.875		7.888		7.996		8.437	6.063	8.127
7.736				7.888		7.878		7.894		8.038		8.446	6.458	8.135
7.78				8.027		7.892		7.911		8.059		8.463	6.775	8.23
7.795				8.093		7.899		7.935		8.072		8.471	6.777	8.241
7.85				8.106		7.913		7.937		8.089		8.48	6.948	8.258
7.96				8.135		7.93		7.937		8.091		8.534	7.463	8.306
8.004				8.357		7.949		7.943		8.116		8.562	7.687	8.308
8.042				8.524		8.027		7.947		8.133		8.57	7.93	8.349
8.08				8.794		8.101		7.97		8.203		8.632	7.979	8.355
8.224				8.82		8.114		8.027		8.249		8.693	8.03	8.357
8.247				8.826		8.192		8.038		8.249		8.699	8.123	8.503
8.342				8.87		8.235		8.059		8.273		8.708	8.564	8.532
8.387				8.896		8.237		8.063		8.338		8.712	9.443	8.534
8.442				9.278		8.338		8.063		8.355		8.739		8.534
8.461				9.477		8.442		8.114		8.359		8.75		8.585
8.475				9.587		8.598		8.139		8.372		8.775		8.642
8.503				10.106		8.611		8.184		8.38		8.792		8.655
8.513						8.632		8.319		8.431		8.801		8.659
8.577						8.684		8.323		8.463		8.811		8.708
8.657						8.862		8.327		8.463		8.868		8.756
8.78						9.018		8.363		8.562		8.896		8.773
8.98						9.033		8.376		8.575		8.908		8.79
9.137						9.041		8.399		8.581		8.925		8.815
9.143						9.058		8.41		8.585		8.961		8.815
9.164						9.107		8.427		8.64		8.968		8.866
9.422						9.168		8.427		8.659		8.999		8.908
9.96						9.187		8.545		8.682		9.018		8.908
10.005						9.295		8.566		8.72		9.088		8.925
10.007						9.337		8.594		8.729		9.128		9.065
10.286						9.475		8.619		8.733		9.213		9.147
10.814						9.559		8.621		8.735		9.219		9.162
						9.709		8.623		8.754		9.242		9.166
						9.745		8.682		8.767		9.263		9.204
						9.935		8.718		8.813		9.27		9.47
						10.041		8.742		8.813		9.295		9.534
						10.138		8.799		8.841		9.301		9.574
						10.165		8.832		8.845		9.373		9.673
						10.269		8.834		8.856		9.447		9.772
						10.355		8.868		8.917		9.458		9.783
						10.662		8.868		9.006		9.614		9.91
								8.887		9.035		9.633		10.045
								8.889		9.052		9.637		10.087
								8.949		9.08		9.707		10.098
								9.025		9.111		9.707		10.136
								9.179		9.145		9.76		10.148
								9.219		9.21		9.806		10.355
								9.27		9.232		9.861		10.374
								9.282		9.272		9.906		10.624
								9.36		9.348		9.914		10.7
								9.367		9.413		10.039		10.729
								9.599		9.42		10.041		10.746
								9.637		9.441		10.157		10.835
								9.652		9.456		10.244		10.966
								9.743		9.47		10.26		10.97
								9.882		9.502		10.355		10.981
								9.908		9.504		10.366
								9.935		9.726		10.366
								10.165		9.829		10.467
								10.167		9.838		10.52
								10.178		9.861		10.554
								10.408		9.933		10.565
								10.543		9.979		10.71
								10.886		10.087		10.736
										10.102		10.755
										10.129		10.757
										10.284		10.843
										10.421		10.873
										10.427
										10.512
										10.603
										10.683
										10.78
										10.818
										10.854
										10.947
