# Supplementary material for: Heat Shock Factor 1 forms nuclear condensates and restructures the yeast genome before activating target genes
Source: eLife. 2024 Oct 15;12:RP92464. doi: 10.7554/eLife.92464 (PMC11479590; doi:10.7554/eLife.92464)
Supplement: Figure 4—source data 1. — Chromatin immunoprecipitation (ChIP) data for HSR genes in cells exposed to heat shock or ethanol stress (Figure 4B). [file elife-92464-fig4-data1.xlsx]

## Sheet: Hsf1 ChIP 
Hsf1 ChIP
		Strain: BY4741
		n=2, qPCR=2
HSP82 UAS				HSP104 UAS				SSA4 UAS				TMA10 UAS				HSP12 UAS
Treatment	AV %IP	St Dev		Treatment	AV %IP	St Dev		Treatment	AV %IP	St Dev		Treatment	AV %IP	St Dev		Treatment	AV %IP	St Dev
NHS	3.21202	1.71437		NHS	1.66131	1.12739		NHS	0.92827	0.573886		NHS	0.0543	0.028095		NHS	1.91694	1.74969
HS 2.5 min	15.8369	3.86043		HS 2.5 min	19.6782	3.97522		HS 2.5 min	18.7055	4.88845		HS 2.5 min	4.83857	1.91405		HS 2.5 min	4.45287	1.16722
HS 10 min	14.8291	1.61033		HS 10 min	20.3156	3.84614		HS 10 min	23.825	4.81512		HS 10 min	11.8248	2.29854		HS 10 min	6.10861	0.194922
HS 20 min	15.929	2.10358		HS 20 min	22.1491	3.92588		HS 20 min	19.6191	3.67142		HS 20 min	4.5035	1.06692		HS 20 min	8.53236	2.92562
HS 60 min	10.8859	0.00308376		HS 60 min	11.7292	0.280222		HS 60 min	6.53619	1.20011		HS 60 min	2.42291	0.890333		HS 60 min	5.76502	1.01077
NHS	3.21202	1.71437		NHS	1.66131	1.12739		NHS	0.928268	0.573886		NHS	0.0543025	0.0280946		NHS	1.91694	1.74969
ES 2.5 min	7.5776	2.4076		ES 2.5 min	8.01606	2.27658		ES 2.5 min	6.0549	1.82844		ES 2.5 min	0.57169	0.274392		ES 2.5 min	2.63524	1.07026
ES 10 min	20.3387	1.0447		ES 10 min	16.1238	3.06647		ES 10 min	13.1193	1.39596		ES 10 min	1.9637	0.348375		ES 10 min	6.17816	0.414862
ES 20 min	22.2415	7.3115		ES 20 min	19.4481	6.87341		ES 20 min	15.7557	4.75583		ES 20 min	4.33027	0.801062		ES 20 min	5.27294	1.4504
ES 60 min	15.3588	3.50187		ES 60 min	16.1174	3.1515		ES 60 min	15.4319	2.14709		ES 60 min	6.03172	2.59763		ES 60 min	5.41075	0.174222

## Sheet: Pol II ChIP
Pol II ChIP		Strain: BY4741
		n=2, qPCR=2
	HSP82						HSP104						SSA4						TMA10
	Prom		ORF				Prom		ORF				Prom		ORF				Prom		ORF			HSP12 ORF
Treatment	AV %IP	St Dev	AV %IP	St Dev		Treatment	AV %IP	St Dev	AV %IP	St Dev		Treatment	AV %IP	St Dev	AV %IP	St Dev		Treatment	AV %IP	St Dev	AV %IP	St Dev		Treatment	AV %IP	St Dev
NHS	0.511097	0.271315	0.520266	0.102702		NHS	0.75773	0.324049	0.524456	0.219283		NHS	0.847889	0.335678	0.42568	0.215111		NHS	0.30981	0.19384	0.468334	0.209633		NHS	0.219827	0.135655
HS 2.5 min	11.73	4.51154	9.80194	6.99585		HS 2.5 min	11.6316	2.92165	5.57539	1.42319		HS 2.5 min	7.70266	2.12342	5.51848	1.26175		HS 2.5 min	3.19778	1.22268	4.33716	1.35963		HS 2.5 min	2.45677	1.42348
HS 10 min	9.86834	2.21231	7.13024	3.81844		HS 10 min	9.48231	0.817027	7.12475	3.49696		HS 10 min	9.17163	2.66693	8.57752	3.83453		HS 10 min	5.50955	1.68271	9.30359	3.49009		HS 10 min	13.5966	5.87071
HS 20 min	6.28205	0.026245	4.52555	0.27021		HS 20 min	6.43015	0.302165	4.32402	0.46054		HS 20 min	5.02593	0.293898	4.91655	0.121331		HS 20 min	3.00761	0.747553	5.44155	0.464585		HS 20 min	10.5496	0.0395126
HS 60 min	4.29728	1.00305	3.95838	1.60613		HS 60 min	4.06137	0.414252	3.3397	1.36521		HS 60 min	2.98392	1.19786	2.69476	1.25561		HS 60 min	2.9718	0.733217	4.65576	1.11473		HS 60 min	3.93825	0.0454447
NHS	0.511097	0.271315	0.520266	0.102702		NHS	0.75773	0.324049	0.524456	0.219283		NHS	0.847889	0.335678	0.42568	0.215111		NHS	0.30981	0.19384	0.468334	0.209633		NHS	0.219827	0.135655
ES 2.5 min	0.75013	0.30293	0.634305	0.404349		ES 2.5 min	0.820621	0.479225	0.456658	0.283141		ES 2.5 min	1.07099	0.313368	0.4032	0.290517		ES 2.5 min	0.30103	0.244718	0.396541	0.277707		ES 2.5 min	0.29946	0.208768
ES 10 min	5.13199	1.87323	2.02063	0.129765		ES 10 min	4.14952	1.81452	1.3211	0.0690969		ES 10 min	3.03917	1.12501	0.64712	0.146462		ES 10 min	0.89169	0.165901	0.885639	0.0235869		ES 10 min	0.497362	0.226288
ES 20 min	7.47193	0.178426	3.64747	0.686473		ES 20 min	6.39267	0.542549	2.87949	0.599472		ES 20 min	6.05297	0.0016331	2.56082	0.721455		ES 20 min	1.82103	0.743226	2.36318	0.966092		ES 20 min	0.393081	0.182377
ES 60 min	8.58521	5.3504	5.45406	3.69436		ES 60 min	7.50697	5.72802	4.98946	3.79182		ES 60 min	7.49195	4.01446	5.66625	4.24447		ES 60 min	3.39603	2.94241	5.55587	4.20691		ES 60 min	1.9293	2.11917

## Sheet: H3 ChIP
H3 ChIP		Strain: BY4741
		n=2, qPCR=2
	HSP82						HSP104						SSA4						TMA10
	Prom		ORF				Prom		ORF				Prom		ORF				Prom		ORF			HSP12 ORF
Treatment	AV %IP	St Dev	AV %IP	St Dev		Treatment	AV %IP	St Dev	AV %IP	St Dev		Treatment	AV %IP	St Dev	AV %IP	St Dev		Treatment	AV %IP	St Dev	AV %IP	St Dev		Treatment	AV %IP	St Dev
NHS	9.91542	2.26931	13.3211	1.40616		NHS	7.88131	2.64402	13.2964	3.59199		NHS	11.3538	0.886952	10.8894	1.78791		NHS	9.5901	1.11208	11.5218	1.32762		NHS	10.9766	1.61379
HS 2.5 min	2.09749	1.23875	4.70984	2.57485		HS 2.5 min	1.64753	1.10279	6.07535	3.11332		HS 2.5 min	8.43082	3.63622	10.8026	4.48629		HS 2.5 min	11.7317	4.60401	15.4737	5.00984		HS 2.5 min	16.9092	4.53034
HS 10 min	0.879484	0.363286	1.42658	0.276927		HS 10 min	0.273221	0.191335	0.858204	0.198605		HS 10 min	1.03319	0.514843	1.28357	0.590375		HS 10 min	3.27125	0.617015	5.82321	1.02041		HS 10 min	2.21533	0.450836
HS 20 min	1.09717	0.573866	2.00533	1.56313		HS 20 min	0.467493	0.486582	1.79299	1.7888		HS 20 min	2.82466	2.52271	3.39197	3.1052		HS 20 min	3.06511	0.40067	6.30452	0.795648		HS 20 min	1.64195	0.628692
HS 60 min	4.19495	1.37866	6.71175	1.20745		HS 60 min	2.97801	0.407137	8.18197	1.27007		HS 60 min	8.07991	0.94994	9.9346	0.100699		HS 60 min	3.96845	0.126867	7.46997	0.00563743		HS 60 min	6.88776	1.06324
NHS	9.91542	2.26931	13.3211	1.40616		NHS	7.88131	2.64402	13.2964	3.59199		NHS	11.3538	0.886952	10.8894	1.78791		NHS	9.5901	1.11208	11.5218	1.32762		NHS	10.9766	1.61379
ES 2.5 min	12.4699	0.769569	20.6842	1.75531		ES 2.5 min	9.84968	2.65014	19.893	1.7714		ES 2.5 min	14.5431	0.321289	15.8355	0.253484		ES 2.5 min	13.4927	0.237573	15.3555	0.366525		ES 2.5 min	16.2396	0.348934
ES 10 min	3.77637	1.81953	8.73848	1.37785		ES 10 min	3.26583	2.09318	13.8354	1.37434		ES 10 min	14.0473	1.36148	17.8315	1.16184		ES 10 min	15.3761	0.901017	17.7605	1.78367		ES 10 min	20.1472	0.522619
ES 20 min	2.49169	0.980014	5.27339	1.08256		ES 20 min	2.2332	0.995025	8.95554	3.42312		ES 20 min	10.4706	3.53549	13.0618	3.51881		ES 20 min	12.882	3.45812	15.9043	3.4323		ES 20 min	18.4797	4.6122
ES 60 min	3.9295	2.72412	6.95992	4.0941		ES 60 min	2.99497	2.3023	6.88708	3.60772		ES 60 min	7.55097	5.04066	9.50668	4.89818		ES 60 min	8.74893	1.78098	12.3817	1.88488		ES 60 min	14.863	1.50983
