# Supplementary material for: Heat Shock Factor 1 forms nuclear condensates and restructures the yeast genome before activating target genes
Source: eLife. 2024 Oct 15;12:RP92464. doi: 10.7554/eLife.92464 (PMC11479590; doi:10.7554/eLife.92464)
Supplement: Figure 5—figure supplement 2—source data 1. — Also tabulated are intragenic interactions at SSA4, HSP82, MDJ1, and HSP12 under ES or HS (Figure 5—figure supplement 2B). [file elife-92464-fig5-figsupp2-data1.xlsx]

## Sheet: HSP104 mRNA
RT-qPCR HS vs ES
Strain: W303-1B
N=2, qPCR=4
Sample	HSP104	SCR1	HSP104	SCR1	HSP104/SCR1
	ng	ng	average biol rep
NS A	0.118278	37.7236	0.123543	41.7789	0.00295706
	0.128807	45.8341
NS B	0.202519	50.0668	0.205657	51.0186	0.00403102
	0.208795	51.9704
10 MIN ES A	1.54979	58.963	1.57921	61.9824	0.0254783
	1.60862	65.0018
10 MIN ES B	0.72777	51.2013	0.709974	51.4818	0.0137908
	0.692179	51.7624
20 MIN ES A	3.27659	61.9658	3.19664	64.1912	0.0497987
	3.11668	66.4165
20 MIN ES B	1.72221	53.8911	1.68962	58.3125	0.0289752
	1.65702	62.7339
10 MIN HS A	7.9383	72.2691	7.69191	78.7726	0.0976471
	7.44552	85.2761
10 MIN HS B	7.08051	60.2044	6.39647	60.2882	0.106098
	5.71243	60.3721
20 MIN HS A	10.091	55.8932	9.81253	59.069	0.16612
	9.53408	62.2447
20 MIN HS B	14.0506	54.2782	14.7384	59.0787	0.249471
	15.4262	63.8791

## Sheet: Fig5-FigSupp2
HSP104 F+782 / HSP104 F-63				HSP104 F+782 / HSP104 F+1550				HSP104 F+782 / HSP104 F+1922				HSP104 F+782 / HSP104 F+2756
Treatment	Biol. Rep.	Normalized frequency of interaction		Treatment	Biol. Rep.	Normalized frequency of interaction		Treatment	Biol. Rep.	Normalized frequency of interaction		Treatment	Biol. Rep.	Normalized frequency of interaction
0 min	Replicate 1	19.7224		0 min	Replicate 1	20.9405		0 min	Replicate 1	11.7392		0 min	Replicate 1	3.02116
	Replicate 2	11.3815			Replicate 2	23.4951			Replicate 2	14.1042			Replicate 2	4.14559
2.5 min HS	Replicate 1	584.791		2.5 min HS	Replicate 1	4447.13		2.5 min HS	Replicate 1	1418.27		2.5 min HS	Replicate 1	601.677
	Replicate 2	471.657			Replicate 2	3164.04			Replicate 2	945.567			Replicate 2	467.544
10 min ES	Replicate 1	491.888		10 min ES	Replicate 1	4142.75		10 min ES	Replicate 1	1618.31		10 min ES	Replicate 1	749.742
	Replicate 2	499.285			Replicate 2	4729.08			Replicate 2	2028.56			Replicate 2	959.795
20 min ES	Replicate 1	395.53		20 min ES	Replicate 1	6551.39		20 min ES	Replicate 1	1734.6		20 min ES	Replicate 1	871.833
	Replicate 2	454.168			Replicate 2	5747.91			Replicate 2	1679.04			Replicate 2	748.943
SSA4 +198 / SSA4 +1079				SSA4 +198 / SSA4 +2255				HSP82 +740 / HSP82 +1446				HSP82 +740 / HSP82 +2189
Treatment	Biol. Rep.	Normalized frequency of interaction		Treatment	Biol. Rep.	Normalized frequency of interaction		Treatment	Biol. Rep.	Normalized frequency of interaction		Treatment	Biol. Rep.	Normalized frequency of interaction
0 min	Replicate 1	1.07663		0 min	Replicate 1	0.119026		0 min	Replicate 1	9.5675		0 min	Replicate 1	2.98422
	Replicate 2	2.5036			Replicate 2	2.08552			Replicate 2	11.4585			Replicate 2	8.18928
2.5 min HS	Replicate 1	98.3952		2.5 min HS	Replicate 1	123.77		2.5 min HS	Replicate 1	1519.78		2.5 min HS	Replicate 1	1395.17
	Replicate 2	62.4361			Replicate 2	66.6213			Replicate 2	1019.83			Replicate 2	966.195
10 min ES	Replicate 1	181.171		10 min ES	Replicate 1	134.26		10 min ES	Replicate 1	1407.26		10 min ES	Replicate 1	1486.93
	Replicate 2	188.723			Replicate 2	143.614			Replicate 2	1675.6			Replicate 2	1789.3
20 min ES	Replicate 1	105.085		20 min ES	Replicate 1	83.3717		20 min ES	Replicate 1	2345.84		20 min ES	Replicate 1	1890.49
	Replicate 2	113.78			Replicate 2	50.9146			Replicate 2	2266.42			Replicate 2	1805.44
MDJ1 F+605 / MDJ1 F+1729				HSP12 F-47 / HSP12 F+279
Treatment	Biol. Rep.	Normalized frequency of interaction		Treatment	Biol. Rep.	Normalized frequency of interaction
0 min	Replicate 1	11.1432		0 min	Replicate 1	35.1288
	Replicate 2	13.5585			Replicate 2	29.8197
2.5 min HS	Replicate 1	82.5486		2.5 min HS	Replicate 1	78.7164
	Replicate 2	57.107			Replicate 2	72.9103
10 min ES	Replicate 1	40.5603		10 min ES	Replicate 1	81.0789
	Replicate 2	49.0064			Replicate 2	49.6604
20 min ES	Replicate 1	15.0062		20 min ES	Replicate 1	26.7173
	Replicate 2	23.2011			Replicate 2	56.2725
