# Supplementary material for: Heat Shock Factor 1 forms nuclear condensates and restructures the yeast genome before activating target genes
Source: eLife. 2024 Oct 15;12:RP92464. doi: 10.7554/eLife.92464 (PMC11479590; doi:10.7554/eLife.92464)
Supplement: Figure 5—source data 1. [file elife-92464-fig5-data1.xlsx]

## Sheet: Fig. 5
3C analysis		N=2; qPCR=4
Intrachromosomal interactions
HSP104 F+1550 / SSA2 F+1368				HSP104 F+1550 / TMA10 F+159				TMA10 F+812 / SSA2 F+198				HSP12 R-47 / MDJ1 F+799
Treatment	Biol. Rep.	Normalized frequency of interaction		Treatment	Biol. Rep.	Normalized frequency of interaction		Treatment	Biol. Rep.	Normalized frequency of interaction		Treatment	Biol. Rep.	Normalized frequency of interaction
0 min	Replicate 1	0.914576		0 min	Replicate 1	0.0233122		0 min	Replicate 1	0.0817499		0 min	Replicate 1	0.813745
	Replicate 2	0.788038			Replicate 2	0.0500538			Replicate 2	0.0792786			Replicate 2	2.39939
2.5 min HS	Replicate 1	321.12		2.5 min HS	Replicate 1	6.13494		2.5 min HS	Replicate 1	0.564773		2.5 min HS	Replicate 1	7.63416
	Replicate 2	262.729			Replicate 2	3.78379			Replicate 2	0.785984			Replicate 2	10.5353
10 min ES	Replicate 1	217.835		10 min ES	Replicate 1	2.82634		10 min ES	Replicate 1	0.308387		10 min ES	Replicate 1	4.36803
	Replicate 2	223.108			Replicate 2	6.59264			Replicate 2	0.408815			Replicate 2	7.6322
20 min ES	Replicate 1	168.574		20 min ES	Replicate 1	4.07073		20 min ES	Replicate 1	0.649281		20 min ES	Replicate 1	4.32758
	Replicate 2	132.835			Replicate 2	4.88516			Replicate 2	0.445171			Replicate 2	3.88055
Interchromosomal interactions
SSA4 F+198 / HSP82 F+740				SSA4 F+198 / HSP82 F+2189				HSP104 F+782 / HSP82 F+2189				HSP12 F-47/ HSP82 F+740
Treatment	Biol. Rep.	Normalized frequency of interaction		Treatment	Biol. Rep.	Normalized frequency of interaction		Treatment	Biol. Rep.	Normalized frequency of interaction		Treatment	Biol. Rep.	Normalized frequency of interaction
0 min	Replicate 1	0.00664974		0 min	Replicate 1	-0.0222872		0 min	Replicate 1	0.101103		0 min	Replicate 1	0.29285
	Replicate 2	0.124493			Replicate 2	-0.00392121			Replicate 2	0.169767			Replicate 2	0.21381
2.5 min HS	Replicate 1	7.78173		2.5 min HS	Replicate 1	0.0912144		2.5 min HS	Replicate 1	12.2901		2.5 min HS	Replicate 1	35.237
	Replicate 2	4.14668			Replicate 2	0.12465			Replicate 2	9.59666			Replicate 2	21.0984
10 min ES	Replicate 1	9.86293		10 min ES	Replicate 1	1.11957		10 min ES	Replicate 1	14.6296		10 min ES	Replicate 1	27.9386
	Replicate 2	7.99655			Replicate 2	1.78792			Replicate 2	10.0888			Replicate 2	29.0331
20 min ES	Replicate 1	11.1304		20 min ES	Replicate 1	0.863779		20 min ES	Replicate 1	24.2957		20 min ES	Replicate 1	14.5005
	Replicate 2	6.59389			Replicate 2	0.680779			Replicate 2	17.5237			Replicate 2	11.3573
HSP104 F+1550 / HSP12 F-47				HSP104 F+1550 / MDJ1 F+605				HSP104 F+1550 / HSP26 F+221				HSP82 F+740 / HSP12 F+279
Treatment	Biol. Rep.	Normalized frequency of interaction		Treatment	Biol. Rep.	Normalized frequency of interaction		Treatment	Biol. Rep.	Normalized frequency of interaction		Treatment	Biol. Rep.	Normalized frequency of interaction
0 min	Replicate 1	0.104728		0 min	Replicate 1	1.10035		0 min	Replicate 1	0.150092		0 min	Replicate 1	-0.072651
	Replicate 2	0.981983			Replicate 2	0.284772			Replicate 2	0.0134223			Replicate 2	0.496771
2.5 min HS	Replicate 1	28.7667		2.5 min HS	Replicate 1	22.199		2.5 min HS	Replicate 1	6.97495		2.5 min HS	Replicate 1	14.729
	Replicate 2	19.678			Replicate 2	13.0276			Replicate 2	4.73657			Replicate 2	10.0722
10 min ES	Replicate 1	31.7889		10 min ES	Replicate 1	14.0486		10 min ES	Replicate 1	4.10119		10 min ES	Replicate 1	4.37826
	Replicate 2	33.9392			Replicate 2	25.0135			Replicate 2	6.73788			Replicate 2	6.0557
20 min ES	Replicate 1	27.9559		20 min ES	Replicate 1	9.82989		20 min ES	Replicate 1	3.09317		20 min ES	Replicate 1	0.368282
	Replicate 2	33.2325			Replicate 2	7.7303			Replicate 2	3.49929			Replicate 2	-2.12568
