# Supplementary material for: Heat Shock Factor 1 forms nuclear condensates and restructures the yeast genome before activating target genes
Source: eLife. 2024 Oct 15;12:RP92464. doi: 10.7554/eLife.92464 (PMC11479590; doi:10.7554/eLife.92464)
Supplement: Figure 6—source data 1. [file elife-92464-fig6-data1.xlsx]

## Sheet: Fig. 6
3C analysis		N=2; qPCR=4
Intrachromosomal interactions
HSP104 F+1550 / SSA2 F+1368				HSP104 F+1550 / TMA10 F+159
Ethanol Stress	Biol. Rep.	Normalized frequency of interaction		Ethanol Stress	Biol. Rep.	Normalized frequency of interaction
0 min	Replicate 1	0.038498		0 min	Replicate 1	0.0096604
	Replicate 2	0.0270854			Replicate 2	0.0182168
2.5 min	Replicate 1	0.187558		2.5 min	Replicate 1	0.032453
	Replicate 2	0.294398			Replicate 2	0.0517676
10 min	Replicate 1	1.21858		10 min	Replicate 1	0.749976
	Replicate 2	0.941118			Replicate 2	0.882386
60 min	Replicate 1	0.0651159		60 min	Replicate 1	0.349312
	Replicate 2	0.0719523			Replicate 2	0.296513
120 min	Replicate 1	0.00852978		120 min	Replicate 1	0.00267772
	Replicate 2	0.0324742			Replicate 2	0.0073641
Interchromosomal interactions
HSP104 F+1550 / HSP12 F-47				HSP104 F+1550 / BTN2 F+1535
Ethanol Stress	Biol. Rep.	Normalized frequency of interaction		Ethanol Stress	Biol. Rep.	Normalized frequency of interaction
0 min	Replicate 1	0.512448		0 min	Replicate 1	0.427728
	Replicate 2	0.664368			Replicate 2	0.461916
2.5 min	Replicate 1	3.30793		2.5 min	Replicate 1	1.6317
	Replicate 2	5.58896			Replicate 2	1.41565
10 min	Replicate 1	8.45489		10 min	Replicate 1	10.8775
	Replicate 2	9.79754			Replicate 2	8.17312
60 min	Replicate 1	0.716018		60 min	Replicate 1	0.747314
	Replicate 2	1.29673			Replicate 2	0.740526
120 min	Replicate 1	0.644243		120 min	Replicate 1	1.06828
	Replicate 2	0.229934			Replicate 2	0.0423176
Intragenic interactions
HSP104 F-63 / HSP104 F+782				HSP104 F+782 / HSP104 F+1550
Ethanol Stress	Biol. Rep.	Normalized frequency of interaction		Ethanol Stress	Biol. Rep.	Normalized frequency of interaction
0 min	Replicate 1	7.57291		0 min	Replicate 1	11.2457
	Replicate 2	14.6425			Replicate 2	10.676
2.5 min	Replicate 1	21.2373		2.5 min	Replicate 1	34.3193
	Replicate 2	29.6478			Replicate 2	40.3967
10 min	Replicate 1	154.213		10 min	Replicate 1	766.206
	Replicate 2	150.797			Replicate 2	684.068
60 min	Replicate 1	14.2037		60 min	Replicate 1	78.2169
	Replicate 2	11.7908			Replicate 2	67.9268
120 min	Replicate 1	4.70977		120 min	Replicate 1	20.681
	Replicate 2	10.4287			Replicate 2	16.2618
SSA4 F+198 / SSA4 F+1079				HSP82 F+740 / HSP82 F+1445				MDJ1F+605 / MDJ1 F+1729
Ethanol Stress	Biol. Rep.	Normalized frequency of interaction		Ethanol Stress	Biol. Rep.	Normalized frequency of interaction		Ethanol Stress	Biol. Rep.	Normalized frequency of interaction
0 min	Replicate 1	0.0197867		0 min	Replicate 1	2.74371		0 min	Replicate 1	0.571247
	Replicate 2	0.175846			Replicate 2	2.68838			Replicate 2	0.658961
2.5 min	Replicate 1	0.227873		2.5 min	Replicate 1	15.7374		2.5 min	Replicate 1	1.36964
	Replicate 2	0.386528			Replicate 2	23.299			Replicate 2	1.19312
10 min	Replicate 1	12.8929		10 min	Replicate 1	142.714		10 min	Replicate 1	2.43988
	Replicate 2	12.6704			Replicate 2	110.938			Replicate 2	2.59378
60 min	Replicate 1	1.84555		60 min	Replicate 1	10.152		60 min	Replicate 1	0.73451
	Replicate 2	2.62503			Replicate 2	9.81816			Replicate 2	0.796583
120 min	Replicate 1	0.00656717		120 min	Replicate 1	2.97533		120 min	Replicate 1	0.840617
	Replicate 2	0.0180606			Replicate 2	5.88774			Replicate 2	0.976438
