# Supplementary material for: Heat Shock Factor 1 forms nuclear condensates and restructures the yeast genome before activating target genes
Source: eLife. 2024 Oct 15;12:RP92464. doi: 10.7554/eLife.92464 (PMC11479590; doi:10.7554/eLife.92464)
Supplement: Figure 7—figure supplement 1—source data 1. — Also tabulated is the percentage of cells exhibiting HSP104-HSP12 coalescence and HSP104 mRNA foci upon ES or HS treatment (Figure 7—figure supplement 1D). [file elife-92464-fig7-figsupp1-data1.xlsx]

## Sheet: Fig7-FigSupp1C
HS (min)		% Coalescence
0 min	Replicate 1	2.35294
	Replicate 2	3.50877
2.5 min	Replicate 1	6.38298
	Replicate 2	7.14286
ES (min)		% Coalescence
0 min	Replicate 1	1.28205
	Replicate 2	2.5641
20 min	Replicate 1	5.71429
	Replicate 2	6.32911

## Sheet: Fig7-FigSupp1D
	Related to Fig. 7C, F; Fig. 7-Fig. supp. 1D
	Coalescence				Transcription
	Replicate 1		Replicate 2		Replicate 1		Replicate 2
Heat Shock (min)	yes	no	yes	no	yes	no	yes	no
0	3	38	3	37	0	41	0	40
2.5	8	33	8	32	33	8	26	31
5	4	37	9	14	26	15	18	37
10	4	36	3	22	16	24	2	38
15	4	35	5	33	14	25	1	37
30	2	35	3	27	9	29	1	29
60	3	28	1	12	1	31	0	13
	Coalescence				Transcription
	Replicate 1		Replicate 2		Replicate 1		Replicate 2
Ethanol Stress (min)	yes	no	yes	no	yes	no	yes	no
0	1	50	2	49	0	51	0	51
2.5	2	41	4	34	0	43	0	38
5	6	36	3	29	3	39	1	31
10	6	36	3	35	14	28	6	32
15	8	33	2	36	21	20	10	28
30	9	32	3	35	17	24	23	15
60	5	36	2	36	13	28	20	18
90	0	42	2	36	9	33	16	22
120	2	38	1	37	3	37	12	26
150	4	33	3	35	2	37	10	28
180	4	36	5	33	5	35	12	26
