# Supplementary material for: Heat Shock Factor 1 forms nuclear condensates and restructures the yeast genome before activating target genes
Source: eLife. 2024 Oct 15;12:RP92464. doi: 10.7554/eLife.92464 (PMC11479590; doi:10.7554/eLife.92464)
Supplement: Figure 7—source data 1. — It also tabulates values used in creating the heat map for HSP104-HSP12 coalescence and HSP104 mRNA levels (A.U.) under HS (Figure 7D) or ES conditions (Figure 7E). [file elife-92464-fig7-data1.xlsx]

## Sheet: Fig. 7C, F
	Related to Fig. 7C, F; Fig. 7-Fig. supp. 1D
	Coalescence				Transcription
	Replicate 1		Replicate 2		Replicate 1		Replicate 2
Heat Shock (min)	yes	no	yes	no	yes	no	yes	no
0	3	38	3	37	0	41	0	40
2.5	8	33	8	32	33	8	26	31
5	4	37	9	14	26	15	18	37
10	4	36	3	22	16	24	2	38
15	4	35	5	33	14	25	1	37
30	2	35	3	27	9	29	1	29
60	3	28	1	12	1	31	0	13
	Coalescence				Transcription
	Replicate 1		Replicate 2		Replicate 1		Replicate 2
Ethanol Stress (min)	yes	no	yes	no	yes	no	yes	no
0	1	50	2	49	0	51	0	51
2.5	2	41	4	34	0	43	0	38
5	6	36	3	29	3	39	1	31
10	6	36	3	35	14	28	6	32
15	8	33	2	36	21	20	10	28
30	9	32	3	35	17	24	23	15
60	5	36	2	36	13	28	20	18
90	0	42	2	36	9	33	16	22
120	2	38	1	37	3	37	12	26
150	4	33	3	35	2	37	10	28
180	4	36	5	33	5	35	12	26

## Sheet: Fig. 7D
HSP104-HSP12 Coalescence								HSP104 Transcription
Heat Shock (min)								Heat Shock (min)
0	2.5	5	10	15	30	60		0	2.5	5	10	15	30	60
1	1	1	0	0	0	0		0	0	0	0	0	0	0
1	1	1	1	1	0	0		0	113	112	0	0	0	0
1	1	0	0	0	0	0		0	128	0	0	0	0	0
1	0	0	1	0	0	0		0	0	115	0	0	0	0
1	1	1	0	0	0	0		0	0	0	0	0	0	0
1	0	0	0	0	0	0		0	117	112	0	0	0	0
0	1	1	1	0	0	0		0	140	116	0	0	0	0
0	1	0	0	0	0	0		0	150	145	148	124	0	0
0	1	0	0	0	0	0		0	0	0	0	0	0	0
0	1	1	1	1	0	0		0	159	156	120	148	0	0
0	1	0	0	0	0	0		0	154	159	143	135	0	0
0	1	0	1	0	0	0		0	0	0	0	0	0	0
0	1	1	0	0	0	0		0	110	0	0	0	0	0
0	1	1	0	1	0	0		0	151	144	0	0	0	0
0	1	1	0	0	0	0		0	116	0	0	0	0	0
0	1	0	0	0	1	0		0	135	0	0	0	0	0
0	1	1	0	0	0	0		0	0	0	0	0	0	0
0	1	1	0	0	0	0		0	0	0	0	0	0	0
0	0	1	0	0	0	0		0	0	0	0	0	0	0
0	0	1	0	0	0	0		0	133	0	0	0	0	0
0	0	1	0	0	0	0		0	115	111	0	0	0	0
0	0	0	1	0	0	0		0	0	0	121	0	0	0
0	0	0	1	0	0	0		0	137	0	0	0	0	0
0	0	0	0	1	0	0		0	0	138	0	0	0	0
0	0	0	0	1	0	1		0	145	150	153	147	138	0
0	0	0	0	1	0	0		0	0	0	0	0	0	0
0	0	0	0	1	0	0		0	112	0	0	0	0	0
0	0	0	0	1	0	0		0	124	0	0	0	0	0
0	0	0	0	1	0	0		0	118	0	0	0	0	0
0	0	0	0	0	1	0		0	124	132	122	119	119	0
0	0	0	0	0	1	1		0	145	119	0	0	0	0
0	0	0	0	0	1	1		0	0	115	0	0	0	0
0	0	0	0	0	1	0		0	195	166	0	0	131	0
0	0	0	0	0	0	1		0	139	134	139	124	124	0
0	0	0	0	0	0	0		0	168	174	165	136	119	0
0	0	0	0	0	0	0		0	168	0	0	0	0	0
0	0	0	0	0	0	0		0	155	130	115	117	0	0
0	0	0	0	0	0	0		0	153	148	159	162	140	0
0	0	0	0	0	0	0		0	152	124	0	0	0	0
0	0	0	0	0	0	0		0	151	135	0	0	0	0
0	0	0	0	0	0	0		0	150	0	129	0	0	0
0	0	0	0	0	0	0		0	148	137	115	0	0	0
0	0	0	0	0	0	0		0	147	133	137	121	132	120
0	0	0	0	0	0	0		0	146	145	0	0	0	0
0	0	0	0	0	0	0		0	143	132	0	0	0	0
0	0	0	0	0	0	0		0	143	132	0	0	0	0
0	0	0	0	0	0	0		0	142	150	160	155	139	0
0	0	0	0	0	0	0		0	142	167	0	0	0	0
0	0	0	0	0	0	0		0	141	120	0	0	0	0
0	0	0	0	0	0	0		0	141	137	0	0	0	0
0	0	0	0	0	0	0		0	140	163	147	123	0	0
0	0	0	0	0	0	0		0	137	121	0	0	0	0
0	0	0	0	0	0	0		0	135	118	139	136	0	0
0	0	0	0	0	0	0		0	130	116	0	0	0	0
0	0	0	0	0	0	0		0	130	142	0	0	0	0
0	0	0	0	0	0	0		0	130	109	0	0	0	0
0	0	0	0	0	0	0		0	129	119	0	0	0	0
0	0	0	0	0	0	0		0	128	0	0	0	0	0
0	0	0	0	0	0	0		0	125	0	0	0	0	0
0	0	0	0	0	0	0		0	124	0	0	0	0	0
0	0	0	0	0	0	0		0	124	153	152	128	126	0
0	0	0	0	0	0	0		0	121	116	0	0	0	0
0	0	0	0	0	0	0		0	120	0	0	0	0	0
0	0	0	0	0	0	0		0	120	0	0	0	0	0
0	0	0	0	0	0	0		0	119	0	0	0	0	0
0	0	0	0	0	0	0		0	118	0	0	0	0	0
0	0	0	0	0	0	0		0	112	0	0	0	0	0
0	0	0	0	0	0	0		0	112	113	0	0	0	0
0	0	0	0	0	0	0		0	111	0	0	0	0	0
0	0	0	0	0	0	0		0	110	110	0	0	0	0
0	0	0	0	0	0	0		0	0	115	0	0	0	0
0	0	0	0	0	0	0		0	0	111	0	0	0	0
0	0	0	0	0	0	0		0	0	0	142	136	126	0
0	0	0	0	0	0	0		0	0	0	0	0	0	0
0	0	0	0	0	0	0		0	0	0	0	0	0	0
0	0	0	0	0	0	0		0	0	0	0	0	0	0
0	0	0	0	0	0	0		0	0	0	0	0	0	0
0	0	0	0	0	0	0		0	0	0	0	0	0	0
0	0	0	0	0	0	0		0	0	0	0	0	0	0
0	0	0	0	0	0	0		0	0	0	0	0	0	0
0	0	0	0	0	0	0		0	0	0	0	0	0	0

## Sheet: Fig. 7E
HSP104-HSP12 Coalescence												HSP104 Transcription
Ethanol Stress (min)												Ethanol Stress (min)
0	2.5	5	10	15	30	60	90	120	150	180		0	2.5	5	10	15	30	60	90	120	150	180
1	0	0	0	0	0	0	0	0	0	0		0	0	0	0	0	135	123	122	128	120	133
1	0	0	0	0	0	0	1	1	0	0		0	0	0	0	0	0	0	0	0	0	0
0	1	0	0	0	0	1	0	0	0	0		0	0	0	0	143	132	132	134	134	128	127
0	1	1	1	1	0	0	0	0	1	1		0	0	0	152	0	0	0	0	0	0	0
0	1	0	1	1	1	0	0	0	0	0		0	0	0	0	0	0	142	132	121	0	0
0	1	1	1	0	0	0	0	0	1	1		0	0	0	0	0	0	129	0	0	0	0
0	1	0	0	0	0	0	0	0	0	0		0	0	0	0	0	0	0	0	175	123	123
0	1	1	0	1	0	0	0	0	0	0		0	0	0	0	0	0	0	0	0	0	0
0	0	1	0	0	0	0	0	0	0	0		0	0	0	0	0	146	127	122	0	0	0
0	0	1	0	1	0	0	0	0	0	0		0	0	0	143	129	0	0	0	0	0	0
0	0	1	0	0	0	0	0	0	0	0		0	0	0	0	0	0	0	0	0	0	0
0	0	1	0	0	0	0	0	0	0	0		0	0	0	0	126	0	0	0	0	0	0
0	0	1	0	0	1	1	0	0	1	1		0	0	142	147	128	0	0	0	0	0	0
0	0	1	0	1	1	1	0	0	0	0		0	0	0	0	0	0	0	0	0	0	0
0	0	0	1	0	0	0	0	0	0	0		0	0	0	151	168	162	127	121	0	0	0
0	0	0	1	0	0	0	0	0	0	0		0	0	0	169	139	142	120	0	0	0	0
0	0	0	1	0	0	0	0	0	0	0		0	0	130	168	139	140	117	121	0	0	0
0	0	0	1	0	0	1	0	0	0	0		0	0	0	0	126	120	0	0	0	0	0
0	0	0	1	1	0	0	0	0	0	0		0	0	0	0	0	0	0	129	0	0	142
0	0	0	1	1	1	0	0	1	0	0		0	0	0	0	0	0	0	0	0	0	0
0	0	0	0	1	1	0	0	0	0	0		0	0	0	0	0	134	114	0	0	0	0
0	0	0	0	1	0	1	0	0	0	0		0	0	0	0	0	126	0	0	0	0	0
0	0	0	0	1	1	0	0	0	0	0		0	0	0	164	169	126	128	0	0	0	0
0	0	0	0	0	1	0	1	0	0	0		0	0	0	0	0	216	162	142	124	0	0
0	0	0	0	0	1	0	0	0	0	0		0	0	0	151	141	149	0	0	0	0	0
0	0	0	0	0	1	0	0	0	0	0		0	0	0	0	144	141	137	0	146	0	0
0	0	0	0	0	1	0	0	0	0	0		0	0	0	0	0	130	0	0	0	0	0
0	0	0	0	0	1	0	0	0	1	1		0	0	0	0	134	127	120	152	0	0	0
0	0	0	0	0	1	1	0	0	0	0		0	0	0	130	149	115	0	0	0	0	0
0	0	0	0	0	0	1	0	0	0	0		0	0	0	0	0	0	120	0	0	0	0
0	0	0	0	0	0	0	0	1	0	0		0	0	0	156	152	110	0	0	0	0	0
0	0	0	0	0	0	0	0	0	1	1		0	0	0	0	0	132	127	119	0	128	124
0	0	0	0	0	0	0	0	0	1	0		0	0	0	0	0	0	0	0	0	0	0
0	0	0	0	0	0	0	0	0	1	1		0	0	0	0	0	0	0	0	0	0	0
0	0	0	0	0	0	0	0	0	0	1		0	0	0	0	0	152	177	188	144	142	124
0	0	0	0	0	0	0	0	0	0	1		0	0	0	0	0	141	142	0	0	0	0
0	0	0	0	0	0	0	0	0	0	1		0	0	0	0	128	112	0	0	0	0	128
0	0	0	0	0	0	0	0	0	0	0		0	0	119	226	197	117	140	156	0	0	0
0	0	0	0	0	0	0	0	0	0	0		0	0	115	124	119	0	0	0	0	0	0
0	0	0	0	0	0	0	0	0	0	0		0	0	0	194	159	0	123	122	0	0	0
0	0	0	0	0	0	0	0	0	0	0		0	0	0	158	174	188	215	147	154	140	117
0	0	0	0	0	0	0	0	0	0	0		0	0	0	149	130	0	0	0	0	0	0
0	0	0	0	0	0	0	0	0	0	0		0	0	0	147	159	198	150	143	131	133	141
0	0	0	0	0	0	0	0	0	0	0		0	0	0	146	156	192	139	155	128	130	125
0	0	0	0	0	0	0	0	0	0	0		0	0	0	146	147	0	0	0	0	0	0
0	0	0	0	0	0	0	0	0	0	0		0	0	0	129	129	0	0	0	0	0	0
0	0	0	0	0	0	0	0	0	0	0		0	0	0	0	198	174	169	142	116	126	116
0	0	0	0	0	0	0	0	0	0	0		0	0	0	0	148	164	142	161	140	133	128
0	0	0	0	0	0	0	0	0	0	0		0	0	0	0	147	134	127	136	127	0	0
0	0	0	0	0	0	0	0	0	0	0		0	0	0	0	142	138	149	132	0	118	118
0	0	0	0	0	0	0	0	0	0	0		0	0	0	0	138	113	0	0	0	0	0
0	0	0	0	0	0	0	0	0	0	0		0	0	0	0	130	112	0	0	0	0	0
0	0	0	0	0	0	0	0	0	0	0		0	0	0	0	130	0	0	0	0	0	0
0	0	0	0	0	0	0	0	0	0	0		0	0	0	0	0	152	129	0	0	0	141
0	0	0	0	0	0	0	0	0	0	0		0	0	0	0	0	144	166	138	0	0	0
0	0	0	0	0	0	0	0	0	0	0		0	0	0	0	0	135	177	0	0	0	0
0	0	0	0	0	0	0	0	0	0	0		0	0	0	0	0	135	143	163	145	158	156
0	0	0	0	0	0	0	0	0	0	0		0	0	0	0	0	133	0	0	0	0	0
0	0	0	0	0	0	0	0	0	0	0		0	0	0	0	0	130	0	0	0	0	0
0	0	0	0	0	0	0	0	0	0	0		0	0	0	0	0	128	0	0	0	0	0
0	0	0	0	0	0	0	0	0	0	0		0	0	0	0	0	120	0	0	0	0	0
0	0	0	0	0	0	0	0	0	0	0		0	0	0	0	0	120	114	0	0	0	0
0	0	0	0	0	0	0	0	0	0	0		0	0	0	0	0	0	148	139	0	0	151
0	0	0	0	0	0	0	0	0	0	0		0	0	0	0	0	0	117	0	0	0	0
0	0	0	0	0	0	0	0	0	0	0		0	0	0	0	0	0	0	144	156	0	150
0	0	0	0	0	0	0	0	0	0	0		0	0	0	0	0	0	0	121	0	0	0
0	0	0	0	0	0	0	0	0	0	0		0	0	0	0	0	0	0	0	0	0	0
0	0	0	0	0	0	0	0	0	0	0		0	0	0	0	0	0	0	0	0	0	0
0	0	0	0	0	0	0	0	0	0	0		0	0	0	0	0	0	0	0	0	0	0
0	0	0	0	0	0	0	0	0	0	0		0	0	0	0	0	0	0	0	0	0	0
0	0	0	0	0	0	0	0	0	0	0		0	0	0	0	0	0	0	0	0	0	0
0	0	0	0	0	0	0	0	0	0	0		0	0	0	0	0	0	0	0	0	0	0
0	0	0	0	0	0	0	0	0	0	0		0	0	0	0	0	0	0	0	0	0	0
0	0	0	0	0	0	0	0	0	0	0		0	0	0	0	0	0	0	0	0	0	0
0	0	0	0	0	0	0	0	0	0	0		0	0	0	0	0	0	0	0	0	0	0
0	0	0	0	0	0	0	0	0	0	0		0	0	0	0	0	0	0	0	0	0	0
0	0	0	0	0	0	0	0	0	0	0		0	0	0	0	0	0	0	0	0	0	0
0	0	0	0	0	0	0	0	0	0	0		0	0	0	0	0	0	0	0	0	0	0
0	0	0	0	0	0	0	0	0	0	0		0	0	0	0	0	0	0	0	0	0	0
