# Supplementary material for: Heat Shock Factor 1 forms nuclear condensates and restructures the yeast genome before activating target genes
Source: eLife. 2024 Oct 15;12:RP92464. doi: 10.7554/eLife.92464 (PMC11479590; doi:10.7554/eLife.92464)
Supplement: Figure 8—figure supplement 1—source data 1. [file elife-92464-fig8-figsupp1-data1.xlsx]

## Sheet: Fig.8-Fig.Supp.1B
		Percentage with puncta
	min	Replicate 1	Replicate 2	Average	StDev
HS 39°C	0	0	0	0	0
	2.5	99.2701	64.4385	81.8543	24.6296
	10		89.1892	89.1892	#DIV/0!
	20	10.4651	70.235	40.3501	42.2637
	30	16.4502	36.2319	26.341	13.9877
	60		30.9134	30.9134	#DIV/0!
ES 8.5%	0	0	0	0	0
	2.5	98.0282	98.5401	98.2842	0.362025
	10		97.2603	97.2603	#DIV/0!
	20	97.1631	98.3333	97.7482	0.827463
	30	98.0392	98.7261	98.3827	0.485705
	60	97.2868	93.1217	95.2043	2.94519
	90	96.0318	94.6746	95.3532	0.959678
	120	95.2239	93.7107	94.4673	1.06999
	150	95.4819		95.4819	#DIV/0!
5% ethanol stress
	Total cells counted		Cells with puncta		Percentage with puncta
5% Ethanol Stress (min)	Replicate 1	Replicate 2	Replicate 1	Replicate 2	Replicate 1	Replicate 2	Average	StDev
0	333	189	11	21	3.3033	11.1111	7.20721	5.52095
2.5	133	189	124	189	93.2331	100	96.6165	4.78493
10	137	195	126	195	91.9708	100	95.9854	5.6775
15	143	192	129	192	90.2098	100	95.1049	6.92272
30	117	186	49	84	41.8803	45.1613	43.5208	2.31998
60	147	195	75	46	51.0204	23.5897	37.3051	19.3964
90	96	202	7	97	7.29167	48.0198	27.6557	28.7991
120	144	202	42	118	29.1667	58.4158	43.7913	20.6823
150	150	206	27	10	18	4.85437	11.4272	9.29536
180	138	202	25	57	18.1159	28.2178	23.1669	7.14311
