# Supplementary material for: Heat Shock Factor 1 forms nuclear condensates and restructures the yeast genome before activating target genes
Source: eLife. 2024 Oct 15;12:RP92464. doi: 10.7554/eLife.92464 (PMC11479590; doi:10.7554/eLife.92464)
Supplement: Figure 8—source data 1. [file elife-92464-fig8-data1.xlsx]

## Sheet: Fig. 8
	Hsf1-GFP Heat stress		Hsf1-GFP Ethanol stress
Time	Replicate 1	Replicate 2	Replicate 1	Replicate 2
0 min	8	9	14	11
2.5 min	91	94	95	100
10 min	95	100	100	100
15 min	98	96	100	100
30 min	52	46	100	100
60 min	16	15	100	100
