# Supplementary material for: Heat Shock Factor 1 forms nuclear condensates and restructures the yeast genome before activating target genes
Source: eLife. 2024 Oct 15;12:RP92464. doi: 10.7554/eLife.92464 (PMC11479590; doi:10.7554/eLife.92464)
Supplement: Figure 9—figure supplement 1—source data 3. — Also tabulated is the optical density (OD600) of cells in liquid culture at 25°C +/-1 mM auxin. Cells bear Hsf1-mAID-9xMyc or Rpb1-mAID-9xMyc (Figure 9—figure supplement 1B). [file elife-92464-fig9-figsupp1-data3.xlsx]

## Sheet: Fig.9-Fig.Supp.1A
	Hsf1/Pgk1		Normalize to 0 min auxin
Auxin Treatment (min)	Replicate 1	Replicate 2	Replicate 1	Replicate 2	Average	St dev
0	1.85038	2.17672	100	100	100	0
10	0.0591031	0.088852	3.19411	4.08192	3.63801	0.62778
20	0.0278288	0.0335215	1.50395	1.54	1.52197	0.0254936
30	0.0112805	0.0237079	0.609631	1.08916	0.849393	0.339075
60	0.0131182	0.0194212	0.708944	0.892224	0.800584	0.129599
	Rpb1/Pgk1		Normalize to 0 min auxin
Auxin Treatment (min)	Replicate 1	Replicate 2	Replicate 1	Replicate 2	Average	St dev
0	1.7309	1.58946	100	100	100	0
20	0.590587	0.561709	34.1202	35.3396	34.7299	0.862253
30	0.257922	0.103766	14.901	6.52836	10.7147	5.92033
40	0.035539	0.0713889	2.05321	4.49139	3.2723	1.72405
60	0.0373145	0.0295136	2.15578	1.85683	2.00631	0.211394

## Sheet: Fig.9-Fig.Supp.1B
Analysis of growth of strains harboring Hsf1 or Rpb1 fused to mAID-cMYC9
				T= 30°C
		N=2		OD readings in 1:2 diluted samples and supp with Aux or EtOH
			OD600				Auxin		Vehicle
	Time (min)	Time (hr)	A + Aux	B + Aux	A + Veh	B + Veh	Average	St dev	Average	St dev
Hsf1	0	0	0.4	0.4	0.4	0.4	0.4	0	0.4	0
	6	0.1	0.427	0.441	0.447	0.435	0.434	0.00989949	0.441	0.00848528
	14	0.233333	0.451	0.46	0.47	0.452	0.4555	0.00636396	0.461	0.0127279
	22	0.366667	0.483	0.506	0.498	0.477	0.4945	0.0162635	0.4875	0.0148492
	50	0.833333	0.57	0.611	0.609	0.571	0.5905	0.0289914	0.59	0.0268701
	76	1.26667	0.692	0.736	0.726	0.697	0.714	0.0311127	0.7115	0.0205061
	108	1.8	0.828	0.881	0.867	0.85	0.8545	0.0374767	0.8585	0.0120208
Rpb1	0	0	0.4	0.4	0.4	0.4	0.4	0	0.4	0
	6	0.1	0.451	0.433	0.467	0.444	0.442	0.0127279	0.4555	0.0162635
	16	0.266667	0.49	0.479	0.496	0.466	0.4845	0.00777817	0.481	0.0212132
	24	0.4	0.499	0.515	0.523	0.488	0.507	0.0113137	0.5055	0.0247487
	32	0.533333	0.538	0.534	0.558	0.513	0.536	0.00282843	0.5355	0.0318198
	50	0.833333	0.608	0.583	0.624	0.59	0.5955	0.0176777	0.607	0.0240416
	78	1.3	0.687	0.685	0.771	0.731	0.686	0.00141421	0.751	0.0282843
	126	2.1	0.799	0.8	0.976	0.915	0.7995	0.000707107	0.9455	0.0431335
