# Supplementary material for: Heat Shock Factor 1 forms nuclear condensates and restructures the yeast genome before activating target genes
Source: eLife. 2024 Oct 15;12:RP92464. doi: 10.7554/eLife.92464 (PMC11479590; doi:10.7554/eLife.92464)
Supplement: Figure 9—source data 1. [file elife-92464-fig9-data1.xlsx]

## Sheet: Fig. 9
HSP104 F+1550 / HSP12 F-47			Normalized Interaction Frequency		HSP82 F+740 / HSP12 F-47			Normalized Interaction Frequency
2.5 min Heat shock	LRY016	Replicate 1	67.0808		2.5 min Heat shock	LRY016	Replicate 1	21.4589
		Replicate 2	60.9909				Replicate 2	30.5978
	Hsf1-mAID	Replicate 1	1.63519			Hsf1-mAID	Replicate 1	1.60423
		Replicate 2	1.9206				Replicate 2	0.438317
	Rpb1-mAID	Replicate 1	2.15726			Rpb1-mAID	Replicate 1	1.27991
		Replicate 2	0.85193				Replicate 2	1.41242
10 min Ethanol Stress	LRY016	Replicate 1	71.441		10 min Ethanol Stress	LRY016	Replicate 1	18.7203
		Replicate 2	98.0239				Replicate 2	21.8815
	Hsf1-mAID	Replicate 1	2.97333			Hsf1-mAID	Replicate 1	1.24754
		Replicate 2	0.751556				Replicate 2	0.743343
	Rpb1-mAID	Replicate 1	8.99309			Rpb1-mAID	Replicate 1	7.3622
		Replicate 2	18.8975				Replicate 2	5.34277
HSP104 F+782 / HSP82 F+2189			Normalized Interaction Frequency		SSA4 F+198 / HSP82 F+740			Normalized Interaction Frequency
2.5 min Heat shock	LRY016	Replicate 1	6.54915		2.5 min Heat shock	LRY016	Replicate 1	6.78884
		Replicate 2	2.96262				Replicate 2	3.01957
	Hsf1-mAID	Replicate 1	0.0967437			Hsf1-mAID	Replicate 1	0.0111955
		Replicate 2	0.100998				Replicate 2	0.130713
	Rpb1-mAID	Replicate 1	0.0672321			Rpb1-mAID	Replicate 1	0.718943
		Replicate 2	0.0171545				Replicate 2	0.203183
10 min Ethanol Stress	LRY016	Replicate 1	3.05495		10 min Ethanol Stress	LRY016	Replicate 1	5.45828
		Replicate 2	3.18101				Replicate 2	5.0559
	Hsf1-mAID	Replicate 1	0.266059			Hsf1-mAID	Replicate 1	0.144636
		Replicate 2	-0.165984				Replicate 2	0.299586
	Rpb1-mAID	Replicate 1	1.55039			Rpb1-mAID	Replicate 1	0.852463
		Replicate 2	0.654579				Replicate 2	0.957671
HSP104 F+1550 / HSP26 F+221			Normalized Interaction Frequency		HSP12 F-47 / HSP26 F+221			Normalized Interaction Frequency
2.5 min Heat shock	LRY016	Replicate 1	5.00032		2.5 min Heat shock	LRY016	Replicate 1	8.95328
		Replicate 2	4.33491				Replicate 2	9.77889
	Hsf1-mAID	Replicate 1	0.356743			Hsf1-mAID	Replicate 1	0.497351
		Replicate 2	0.682475				Replicate 2	0.244332
	Rpb1-mAID	Replicate 1	0.899379			Rpb1-mAID	Replicate 1	1.38292
		Replicate 2	0.331867				Replicate 2	0.568925
10 min Ethanol Stress	LRY016	Replicate 1	20.0737		10 min Ethanol Stress	LRY016	Replicate 1	1.87779
		Replicate 2	16.3561				Replicate 2	3.20939
	Hsf1-mAID	Replicate 1	1.79098			Hsf1-mAID	Replicate 1	0.777061
		Replicate 2	1.74977				Replicate 2	1.78043
	Rpb1-mAID	Replicate 1	3.59592			Rpb1-mAID	Replicate 1	3.69156
		Replicate 2	5.10562				Replicate 2	1.95996
